# Supplementary material
Source: Research Square preprint supplement (doi:10.21203/rs.3.rs-9153530/v1)
Supplement: Supplementary file 1 [file 40e49b16a32cc54cc7c23184.xlsx]

## Sheet: TableS1
Table S1 Detailed information of recovered MAGs.
Bacterial MAGs
Bin	Completeness	Contamination	Completeness Model Used	Coding Density	Contig N50	Average Gene Length	Genome Size	GC Content	Total Coding Sequences	Additional Notes	Phylum	Class	Order	Family	Genus	Relative abundances			Group
																T3	T4	T5
RD12_bin.1	75.04	0.3	Gradient Boost (General Model)	0.94	8949	268.763	2666513	0.72	3120	None	Actinobacteriota	Thermoleophilia	Gaiellales	Gaiellaceae	AC-32	3.35613	3.01767	2.9084	NA
RD1_bin.1	79.6	3.43	Neural Network (Specific Model)	0.872	8093	253.123	2916173	0.6	3356	None	Proteobacteria	Gammaproteobacteria	Acidiferrobacterales	Sulfurifustaceae	Sulfuricaulis	13.6018	15.8874	19.193	NA
RD1_bin.2	85	1.86	Neural Network (Specific Model)	0.933	7026	280.993	2490165	0.59	2762	None	Proteobacteria	Gammaproteobacteria	Burkholderiales	Methylophilaceae	CAIJXJ01	2.43114	1.49641	1.33636	MAG group 1
RD2_bin.10	84.41	1.66	Neural Network (Specific Model)	0.884	10257	303.725	3805269	0.54	3699	None	Proteobacteria	Gammaproteobacteria	Methylococcales	Methylomonadaceae	Methylomonas	4.77353	1.12808	1.14383	MAG group 1
RD2_bin.3	83.97	1.37	Neural Network (Specific Model)	0.947	9901	291.102	2749307	0.66	2988	None	Proteobacteria	Gammaproteobacteria	Burkholderiales	Rhodocyclaceae	Fen-999	9.83914	7.61379	3.39889	MAG group 1
RD2_bin.4	93.15	2.39	Gradient Boost (General Model)	0.918	33565	320.727	4485562	0.54	4291	None	Spirochaetota	Leptospirae	Leptospirales	Leptonemataceae	Leptonema	1.83902	0.759692	0	MAG group 2
RD2_bin.5	85.5	4.07	Gradient Boost (General Model)	0.917	3562	263.339	2531426	0.33	2946	None	Bacteroidota	Ignavibacteria	Ignavibacteriales	Ignavibacteriaceae	Ignavibacterium	0.818105	1.63306	0.319608	NA
RD2_bin.7	91.05	2.15	Gradient Boost (General Model)	0.843	9426	284.265	4114339	0.56	4074	None	Cyanobacteria	Cyanobacteriia	unclassified	unclassified	unclassified	3.59704	5.92006	0.139484	NA
RD2_bin.8	75.76	7.09	Gradient Boost (General Model)	0.876	3577	235.473	4094333	0.55	5091	None	Desulfobacterota	Binatia	UBA9968	UBA9968	DP-20	1.7571	1.37656	1.31333	NA
RD8_bin.2	91.52	9.39	Gradient Boost (General Model)	0.855	5392	266.167	4659208	0.54	5000	None	Desulfobacterota	SM23-61	SM23-61	SM23-61	unclassified	1.30925	0.921148	1.20727	NA
RE10_bin.2	89.25	0.97	Gradient Boost (General Model)	0.903	5329	280.428	3769535	0.47	4055	None	Bacteroidota	Bacteroidia	Cytophagales	Cyclobacteriaceae	Mariniradius	1.56239	2.79234	0.105768	MAG group 2
RE10_bin.3	70.74	0.27	Gradient Boost (General Model)	0.905	4380	301.573	2820358	0.61	2824	None	Bacteroidota	Bacteroidia	Chitinophagales	Saprospiraceae	unclassified	0.852969	3.53178	0.188693	MAG group 2
RE10_bin.4	78.95	0.6	Gradient Boost (General Model)	0.913	12408	303.509	3298363	0.69	3312	None	Proteobacteria	Gammaproteobacteria	Burkholderiales	Burkholderiaceae	DSNY01	4.42829	9.14752	2.18015	MAG group 2
RE10_bin.6	82.79	5.92	Gradient Boost (General Model)	0.905	11275	292.787	3620003	0.66	3737	None	Proteobacteria	Gammaproteobacteria	Burkholderiales	Burkholderiaceae	unclassified	3.77519	8.82739	2.36412	MAG group 2
RE10_bin.7	94.05	2.65	Gradient Boost (General Model)	0.934	32297	322.549	3967853	0.71	3838	None	Proteobacteria	Alphaproteobacteria	Acetobacterales	Acetobacteraceae	Elioraea_A	1.69786	3.12835	0.183312	MAG group 2
RE10_bin.8	78.3	2.01	Gradient Boost (General Model)	0.916	12637	310.989	3461377	0.72	3402	None	Proteobacteria	Gammaproteobacteria	Steroidobacterales	Steroidobacteraceae	unclassified	5.77137	11.0177	3.67238	MAG group 2
RE12_bin.1	100	0.75	Gradient Boost (General Model)	0.92	98378	350.365	2892696	0.47	2537	None	Goldbacteria	PGYV01	PGYV01	DSBP01	unclassified	0.0571485	2.34266	0	NA
RE12_bin.15	99.45	1.23	Gradient Boost (General Model)	0.898	314157	364.542	6086025	0.43	5001	None	Bacteroidota	Bacteroidia	Bacteroidales	UBA4181	JAAUTT01	0	2.57191	0	NA
RE12_bin.16	83.89	3	Neural Network (Specific Model)	0.943	9766	321.227	1914353	0.42	1876	None	Bacteroidota	Bacteroidia	Bacteroidales	UBA932	Bact-08	0.638827	1.96436	0	NA
RE12_bin.2	75.04	0.38	Neural Network (Specific Model)	0.946	8338	288.591	1752476	0.63	1918	None	Proteobacteria	Gammaproteobacteria	Burkholderiales	Gallionellaceae	Sideroxydans	2.37939	3.63596	1.99996	NA
RE12_bin.20	78.71	0.98	Gradient Boost (General Model)	0.92	5464	270.748	3265220	0.55	3707	None	Spirochaetota	Leptospirae	Leptospirales	Leptonemataceae	Leptonema	0.506413	0.833493	0	NA
RE12_bin.21	93.58	2.84	Gradient Boost (General Model)	0.863	35016	332.346	2760892	0.41	2393	None	Bacteroidota	Bacteroidia	Bacteroidales	UBA7960	unclassified	0	2.04829	0	MAG group 2
RE12_bin.22	85.51	3.38	Gradient Boost (General Model)	0.919	6363	284.694	2742419	0.64	2955	None	Proteobacteria	Alphaproteobacteria	Dongiales	Dongiaceae	Dongia	1.51593	2.63574	1.46125	NA
RE12_bin.3	97.07	1.12	Neural Network (Specific Model)	0.926	23075	330.453	2889550	0.33	2703	None	Bacteroidota	Ignavibacteria	Ignavibacteriales	Ignavibacteriaceae	Ignavibacterium	0.837475	2.08965	0.417648	NA
RE12_bin.4	98.94	0.09	Gradient Boost (General Model)	0.895	180804	298.485	988563	0.56	989	None	Patescibacteria	Paceibacteria	Moranbacterales	UBA1568	UBA1568	1.4695	3.83215	0.234842	NA
RE12_bin.7	97.53	0.03	Gradient Boost (General Model)	0.91	48517	275.216	587331	0.5	649	None	Patescibacteria	Paceibacteria	UBA6257	unclassified	unclassified	0.443695	2.25265	0	MAG group 2
RE12_bin.8	99.86	2.76	Gradient Boost (General Model)	0.91	22909	364.703	4385469	0.36	3653	None	Bacteroidota	Bacteroidia	Bacteroidales	UBA4181	JAAUTT01	0.0985	2.15756	0	NA
RE12_bin.9	76.11	0.71	Gradient Boost (General Model)	0.895	7177	321.575	2940249	0.4	2732	None	Bacteroidota	Bacteroidia	Bacteroidales	UBA10428	UBA10428	0.0503821	1.13682	0	NA
RE1_bin.5	96.82	1.96	Gradient Boost (General Model)	0.915	14976	311.549	4396728	0.75	4313	None	Myxococcota	Myxococcia	Myxococcales	Anaeromyxobacteraceae	unclassified	1.38045	1.34485	1.77036	NA
RE1_bin.6	80.81	5.18	Gradient Boost (General Model)	0.914	19515	292.085	2480071	0.69	2595	None	Actinobacteriota	Thermoleophilia	Solirubrobacterales	1970-09-01	unclassified	11.6336	13.0868	12.0164	NA
RE2_bin.1	79.81	3.24	Neural Network (Specific Model)	0.917	8970	283.123	2349885	0.56	2543	None	Proteobacteria	Gammaproteobacteria	Burkholderiales	Sulfuricellaceae	unclassified	4.4567	7.02952	7.78456	MAG group 3
RE2_bin.6	85.85	0.36	Gradient Boost (General Model)	0.924	14911	337.607	3037757	0.5	2778	None	Bacteroidota	Bacteroidia	Bacteroidales	VadinHA17	SR-FBR-E99	1.27242	4.90812	0.0641505	NA
RE3_bin.6	76.02	2.11	Neural Network (Specific Model)	0.891	7915	269.795	2446817	0.63	2698	None	Proteobacteria	Gammaproteobacteria	Acidiferrobacterales	Sulfurifustaceae	Sulfuricaulis	15.6838	16.4989	26.6311	MAG group 3
RE4_bin.1	94.42	6.36	Gradient Boost (General Model)	0.875	7555	270.933	5926202	0.55	6396	None	Desulfobacterota	Binatia	UBA9968	UBA9968	DP-20	1.90357	1.66213	1.46229	NA
RE5_bin.1	90.66	1.15	Gradient Boost (General Model)	0.913	21547	316.871	3577386	0.69	3439	None	Proteobacteria	Gammaproteobacteria	Burkholderiales	Casimicrobiaceae	CAIWHR01	4.48927	5.47991	6.15616	MAG group 3
RE5_bin.6	75.76	1.5	Gradient Boost (General Model)	0.958	3842	288.75	3186206	0.71	3531	None	Acidobacteriota	Thermoanaerobaculia	UBA5066	UBA5066	Fen-183	4.75308	4.934	4.83056	NA
RE6_bin.1	82.69	0.23	Neural Network (Specific Model)	0.905	54773	348.011	3445598	0.46	2990	None	Bacteroidota	Bacteroidia	Bacteroidales	Prolixibacteraceae	UBA1413	1.54715	4.33606	0.0882655	MAG group 2
RE6_bin.10	82.2	1.87	Gradient Boost (General Model)	0.926	23624	348.573	2965209	0.5	2630	None	Bacteroidota	Bacteroidia	Bacteroidales	VadinHA17	SR-FBR-E99	1.23415	6.12405	0.11906	NA
RE6_bin.13	92.4	1.77	Gradient Boost (General Model)	0.924	43962	324.475	3020254	0.51	2870	None	Chloroflexota	Anaerolineae	Anaerolineales	Anaerolineaceae	unclassified	0.559946	4.0706	0.092102	MAG group 2
RE6_bin.14	91.99	3.2	Neural Network (Specific Model)	0.872	16559	344.395	4150944	0.4	3507	None	Bacteroidota	Bacteroidia	Bacteroidales	Marinilabiliaceae	unclassified	0.418825	3.25494	0	NA
RE6_bin.2	96.74	4.23	Gradient Boost (General Model)	0.932	31306	362.018	4889485	0.72	4205	None	Acidobacteriota	Vicinamibacteria	Vicinamibacterales	Fen-181	FEN-299	2.063	2.81227	1.31388	NA
RE6_bin.3	82.9	0.45	Gradient Boost (General Model)	0.911	7292	277.487	3492322	0.66	3827	None	Proteobacteria	Gammaproteobacteria	Burkholderiales	Burkholderiaceae	Hydrogenophaga	2.96081	5.2335	1.60255	MAG group 2
RE6_bin.4	77.57	3.15	Neural Network (Specific Model)	0.904	7349	282.62	3025409	0.69	3230	None	Proteobacteria	Gammaproteobacteria	Pseudomonadales	Pseudomonadaceae	Pseudomonas_K	2.10172	6.22061	2.00003	MAG group 2
RE6_bin.5	82.33	4.45	Gradient Boost (General Model)	0.873	3984	267.248	3023816	0.57	3301	None	Desulfobacterota	Syntrophobacteria	Syntrophobacterales	Syntrophobacteraceae	JAAYUU01	1.67999	3.91388	0.665317	MAG group 2
RE6_bin.6	92	0.74	Gradient Boost (General Model)	0.899	6404	295.345	3454923	0.7	3512	None	Desulfobacterota	Desulfarculia	Desulfarculales	Desulfarculaceae	unclassified	1.32199	3.28089	0	MAG group 2
RE6_bin.7	74.67	2.6	Gradient Boost (General Model)	0.927	3402	257.479	1804165	0.62	2169	None	Proteobacteria	Gammaproteobacteria	Burkholderiales	Gallionellaceae	Sideroxydans	4.66737	5.48723	3.57408	NA
RE6_bin.9	100	0.37	Gradient Boost (General Model)	0.926	38942	369.649	4305475	0.45	3599	None	Bacteroidota	Bacteroidia	Bacteroidales	VadinHA17	LD21	1.05131	3.80888	0.0912429	MAG group 2
RE7_bin.4	90.87	1.53	Gradient Boost (General Model)	0.931	13378	306.938	3483678	0.66	3529	None	Proteobacteria	Gammaproteobacteria	Burkholderiales	Rhodocyclaceae	Fen-999	3.65275	5.09445	2.37054	MAG group 2
RE7_bin.5	87.37	1.35	Gradient Boost (General Model)	0.931	9450	338.72	3360465	0.65	3084	None	Acidobacteriota	Aminicenantia	Aminicenantales	RBG-16-66-30	unclassified	1.95321	1.55805	1.47044	NA
RE8_bin.2	75.23	2.47	Gradient Boost (General Model)	0.943	4877	256.203	2659207	0.73	3271	None	Actinobacteriota	Thermoleophilia	Gaiellales	Gaiellaceae	Gaiella	1.84833	2.06674	1.84994	NA
RE8_bin.4	76.39	1.51	Gradient Boost (General Model)	0.924	4406	267.623	3187479	0.7	3676	None	Proteobacteria	Gammaproteobacteria	Burkholderiales	Burkholderiaceae	Aquabacterium_A	6.10401	7.40706	7.85778	NA
RE9_bin.2	96.97	5.94	Gradient Boost (General Model)	0.905	9612	335.385	6157299	0.62	5548	None	Chloroflexota	Anaerolineae	Caldilineales	Caldilineaceae	Caldilinea	0.93284	3.0053	0.0680375	MAG group 2
RE9_bin.3	91.08	3.12	Gradient Boost (General Model)	0.93	6488	303.945	4063667	0.46	4152	None	Bacteroidota	Bacteroidia	Cytophagales	Cyclobacteriaceae	ELB16-189	0.423815	2.47041	0.0682999	NA
RE9_bin.7	86.01	2.57	Neural Network (Specific Model)	0.949	8682	288.901	3083157	0.71	3384	None	Proteobacteria	Gammaproteobacteria	Burkholderiales	UKL13-2	2023-02-07	4.42724	9.85539	7.25781	MAG group 3
RE9_bin.8	70.31	2.1	Gradient Boost (General Model)	0.929	5995	289.876	2314165	0.72	2477	None	Proteobacteria	Gammaproteobacteria	GCA-2729495	GCA-2729495	SHZI01	3.36868	7.1992	1.98332	MAG group 2
RF10_bin.2	90.28	2.36	Gradient Boost (General Model)	0.925	5197	283.153	3425021	0.75	3736	None	Myxococcota	Myxococcia	Myxococcales	Anaeromyxobacteraceae	unclassified	1.35966	1.24013	1.70787	MAG group 3
RF1_bin.1	92.11	4.28	Gradient Boost (General Model)	0.953	5937	262.195	3788695	0.68	4611	None	Proteobacteria	Gammaproteobacteria	Burkholderiales	SG8-39	SCGC-AG-212-J23	13.3715	14.1269	19.4089	MAG group 3
RF3_bin.5	75.6	2.51	Neural Network (Specific Model)	0.925	5165	273.205	3428386	0.7	3874	None	Proteobacteria	Gammaproteobacteria	Burkholderiales	Burkholderiaceae	Aquabacterium_A	6.36393	7.71535	8.2692	MAG group 3
RF4_bin.1	96.57	0.02	Gradient Boost (General Model)	0.956	51806	325.061	3098938	0.7	3049	None	Gemmatimonadota	Gemmatimonadetes	Gemmatimonadales	GWC2-71-9	AG41	1.32815	1.14324	1.71127	MAG group 3
RF5_bin.2	89.41	2.14	Neural Network (Specific Model)	0.861	9797	274.509	3307495	0.61	3465	None	Proteobacteria	Alphaproteobacteria	Rhizobiales	Beijerinckiaceae	Methylosinus	1.44408	1.29776	3.10477	NA
RF5_bin.3	83.4	1.71	Gradient Boost (General Model)	0.943	14220	307.608	2432830	0.71	2493	None	Gemmatimonadota	Gemmatimonadetes	Gemmatimonadales	GWC2-71-9	unclassified	10.0065	9.65414	13.8391	MAG group 3
RF5_bin.4	80.67	3.52	Neural Network (Specific Model)	0.921	12114	279.994	1965211	0.65	2160	None	Proteobacteria	Gammaproteobacteria	Burkholderiales	Thiobacillaceae	UBA6918	7.94451	11.2961	13.4181	NA
RF5_bin.6	88.92	1.3	Gradient Boost (General Model)	0.909	18469	305.601	3049861	0.73	3031	None	Chloroflexota	Ellin6529	CSP1-4	CSP1-4	unclassified	4.02305	5.02354	4.78003	NA
RF6_bin.1	93.13	0.69	Neural Network (Specific Model)	0.83	7445	270.323	667688	0.28	685	None	Proteobacteria	Gammaproteobacteria	Enterobacterales	Enterobacteriaceae	Buchnera	0	0	3.20406	MAG group 3
RF6_bin.2	98.69	0.01	Gradient Boost (General Model)	0.938	54474	341.029	3554419	0.71	3266	None	Proteobacteria	Gammaproteobacteria	Nevskiales	Nevskiaceae	unclassified	0.583866	0.795332	3.5967	NA
RF8_bin.2	74.72	5.78	Gradient Boost (General Model)	0.85	4276	258.627	3692699	0.69	4055	None	Proteobacteria	Alphaproteobacteria	DSM-16000	Inquilinaceae	unclassified	11.4712	11.631	13.821	NA
RF8_bin.8	90.37	2.54	Gradient Boost (General Model)	0.922	10602	305.599	4036257	0.75	4064	None	Myxococcota	Myxococcia	Myxococcales	Anaeromyxobacteraceae	unclassified	1.69679	1.51053	2.10128	MAG group 3
Archaeal MAGs
Bin	Completeness	Contamination	Completeness Model Used	Coding Density	Contig N50	Average Gene Length	Genome Size	GC Content	Total Coding Sequences	Additional Notes	Phylum	Class	Order	Family	Genus	Relative abundances
																T3	T4	T5
RD1_bin.4	81.57	1.37	Neural Network (Specific Model)	0.85	5703	236.479	1980827	0.52	2380	None	Halobacteriota	Methanomicrobia	Methanomicrobiales	Methanoregulaceae	Methanoregula	2.66097	1.96999	2.59301
RE1_bin.2	78.27	2.34	Neural Network (Specific Model)	0.851	8714	247.079	1941642	0.52	2236	None	Halobacteriota	Methanomicrobia	Methanomicrobiales	Methanoregulaceae	Methanoregula	2.25078	1.88899	2.35293
RF5_bin.5	87.39	2.84	Neural Network (Specific Model)	0.852	9876	251.243	2113382	0.52	2397	None	Halobacteriota	Methanomicrobia	Methanomicrobiales	Methanoregulaceae	Methanoregula	2.47377	1.94519	2.77915

## Sheet: TableS2
Table S2.METABOLIC HMM hits in two representative MAGs.
Category	Function	Gene.abbreviation	RE10_bin.6	RE6_bin.6
Thermophilic specific	Thermophilic specific	rgy	Absent	Absent
Amino acid utilization	4-aminobutyrate aminotransferase and related aminotransferases	4-aminobutyrate aminotransferase and related aminotransferases	Absent	Present
Amino acid utilization	Aminotransferase class I and II	aminotransferase class I and II	Absent	Absent
Amino acid utilization	Phosphoserine aminotransferase	phosphoserine aminotransferase	Present	Present
Amino acid utilization	Ornithine/acetylornithine aminotransferase	ornithine/acetylornithine aminotransferase	Present	Present
Amino acid utilization	Branched-chain amino acid aminotransferase/4-amino-4-deoxychorismate lyase	branched-chain amino acid aminotransferase/4-amino-4-deoxychorismate lyase	Present	Present
Amino acid utilization	Aspartate/tyrosine/aromatic aminotransferase	aspartate/tyrosine/aromatic aminotransferase	Absent	Present
Amino acid utilization	Histidinol-phosphate/aromatic aminotransferase	histidinol-phosphate/aromatic aminotransferase	Present	Present
Amino acid utilization	Serine-pyruvate aminotransferase/archaeal aspartate aminotransferase	serine-pyruvate aminotransferase/archaeal aspartate aminotransferase	Present	Absent
Ethanol fermentation	Acetate => Acetaldehyde	acetate => acetaldehyde	Absent	Absent
Ethanol fermentation	Acetaldehyde => Ethanol	acetaldehyde => ethanol	Absent	Present
Fatty acid degradation	acyl-CoA dehydrogenase	acyl-CoA dehydrogenase	Present	Present
Aromatics degradation	Protocatechuate/Catechol degradation	catA	Absent	Absent
Aromatics degradation	Phenol => Benzoyl-CoA	ubiX||bsdC	Present	Present
Aromatics degradation	Benzoyl-CoA reduction	bcrABCD	Absent	Absent
Complex carbon degradation	Cellulose degrading	cellobiosidase	Absent	Absent
Complex carbon degradation	Cellulose degrading	cellulase	Absent	Absent
Complex carbon degradation	Cellulose degrading	beta-glucosidase	Absent	Absent
Complex carbon degradation	Hemicullulose debranching	arabinosidase	Absent	Absent
Complex carbon degradation	Hemicullulose debranching	beta-glucuronidase	Absent	Absent
Complex carbon degradation	Hemicullulose debranching	alpha-L-rhamnosidase	Absent	Absent
Complex carbon degradation	Endohemicellulases	mannan endo-1,4-beta-mannosidase	Absent	Absent
Complex carbon degradation	Endohemicellulases	alpha-D-xyloside xylohydrolase	Absent	Absent
Complex carbon degradation	Other oligosaccharide degrading	beta-xylosidase	Absent	Absent
Complex carbon degradation	Other oligosaccharide degrading	beta-mannosidase	Absent	Absent
Complex carbon degradation	Other oligosaccharide degrading	beta-galactosidase	Absent	Absent
Complex carbon degradation	Amylolytic enzymes	alpha-amylase	Absent	Absent
Complex carbon degradation	Amylolytic enzymes	glucoamylase	Absent	Present
Complex carbon degradation	Amylolytic enzymes	pullulanase	Absent	Absent
Complex carbon degradation	Amylolytic enzymes	isoamylase	Absent	Present
Complex carbon degradation	Chitin degrading	chitiniase	Absent	Absent
Complex carbon degradation	Chitin degrading	hexosaminidase	Present	Absent
Fermentation	Pyruvate oxidation	porA	Absent	Present
Fermentation	Alcohol utilization	adh	Absent	Absent
Fermentation	Lactate utilization	ldh	Absent	Absent
Fermentation	Acetogenesis	acdA||ack||pta	Present	Present
Fermentation	Acetate to acetyl-CoA	acs	Present	Absent
Fermentation	Pyruvate <=> acetyl-CoA + formate	pflD	Absent	Absent
C1 metabolism	Methanol oxidation	mxaF or mdh	Absent	Absent
C1 metabolism	Methyl amine -> formaldehyde	mauAB	Absent	Absent
C1 metabolism	Formaldehyde oxidation	fdhA||fghA||frmA||mycoS_dep_FDH||fae	Absent	Absent
C1 metabolism	Formate oxidation	fdoG||fdwB||fdoH||fdhAB	Present	Present
C1 metabolism	Aerobic CO oxidation	coxS||coxM||coxL	Present	Present
Methane metabolism	Methane oxidation - Partculate methane monooxygenase	pmoABC	Absent	Absent
Methane metabolism	Methane oxidation - Soluble methane monoxygenase	mmoBD	Absent	Absent
Methane metabolism	Methane production	mcrABC	Absent	Absent
Carbon fixation	CBB cycle - Rubisco (Form I)	Form I	Present	Absent
Carbon fixation	CBB cycle - Rubisco (Form II)	Form II	Absent	Absent
Carbon fixation	3 Hydroxypropionate cycle	mcr||K14469	Absent	Absent
Carbon fixation	3HP/4HB	K14466||K18861	Absent	Absent
Carbon fixation	DC/4-HB	K18861||4hbl	Absent	Absent
Carbon fixation	Wood Ljungdahl pathway	cdhD||cdhE||cooS	Absent	Present
Carbon fixation	Reverse TCA cycle	aclAB	Absent	Absent
Nitrogen cycling	Ammonia oxidation	amoABC	Absent	Absent
Nitrogen cycling	N2 fixation	anfDKG||nifDK||vnfDKG||nifH	Absent	Present
Nitrogen cycling	Nitrite oxidation	nxrAB	Absent	Absent
Nitrogen cycling	Nitrate reduction	napAB||narGH	Present	Absent
Nitrogen cycling	Nitrite reduction to ammonia	nrfADH||nirBD	Absent	Present
Nitrogen cycling	Nitrite reduction	nirKS||octR	Present	Absent
Nitrogen cycling	Nitric oxide reduction	norBC	Absent	Present
Nitrogen cycling	Nitrous oxide reduction	nosDZ	Absent	Present
Nitrogen cycling	Anammox	hzoA||hzsA	Absent	Absent
Sulfur cycling	Sulfide oxidation	fccB||sqr	Absent	Absent
Sulfur cycling	Sulfite reduction	dsrABD||asrABC	Absent	Present
Sulfur cycling	Sulfur oxidation	sdo||sor	Present	Present
Sulfur cycling	Sulfur reduction	sreABC||sor	Absent	Absent
Sulfur cycling	Thiosulfate oxidation	soxBCY	Absent	Present
Sulfur cycling	Sulfate reduction	aprA||sat	Present	Present
Sulfur cycling	Thiosulfate disproportionation	phsA	Absent	Present
Hydrogenases	FeFe hydrogenase	fefe-group-a13	Absent	Absent
Hydrogenases	FeFe hydrogenase	fefe-group-a2	Absent	Absent
Hydrogenases	FeFe hydrogenase	fefe-group-a4	Absent	Absent
Hydrogenases	FeFe hydrogenase	fefe-group-b	Absent	Absent
Hydrogenases	FeFe hydrogenase	fefe-group-c1	Absent	Absent
Hydrogenases	FeFe hydrogenase	fefe-group-c2	Absent	Absent
Hydrogenases	FeFe hydrogenase	fefe-group-c3	Absent	Absent
Hydrogenases	Fe hydrogenase	fe	Absent	Absent
Hydrogenases	Ni-Fe Hydrogenase	nife-group-1	Absent	Present
Hydrogenases	Ni-Fe Hydrogenase	nife-group-2ade	Absent	Absent
Hydrogenases	Ni-Fe Hydrogenase	nife-group-2bc	Absent	Absent
Hydrogenases	Ni-Fe Hydrogenase	nife-group-3abd	Absent	Absent
Hydrogenases	Ni-Fe Hydrogenase	nife-group-3c	Absent	Present
Hydrogenases	Ni-Fe Hydrogenase	nife-group-4a-g	Absent	Absent
Hydrogenases	Ni-Fe Hydrogenase	nife-group-4hi	Absent	Absent
Oxidative phosphorylation	Complex I (NADH-quinone oxidoreductase)	nuoABC	Absent	Present
Oxidative phosphorylation	Complex I (NAD(P)H-quinone oxidoreductase)	NdhABC	Absent	Absent
Oxidative phosphorylation	Complex II (Succinate dehydrogenase/Fumarate reductase)	sdhCD	Present	Absent
Oxidative phosphorylation	Complex III (Cytochrome c reductase)	petAB||fbcH	Present	Absent
Oxidative phosphorylation	Complex V (ATP synthase: V/A-type H+/Na+-transporting ATPase)	atpAB (V/A-type)	Absent	Absent
Oxidative phosphorylation	Complex V (F-type H+-transporting ATPase)	atpAD (F-type)	Absent	Present
Oxygen metabolism (Oxidative phosphorylation Complex IV)	Oxygen metabolism - cytochrome c oxidase, caa3-type	coxAB	Present	Absent
Oxygen metabolism (Oxidative phosphorylation Complex IV)	Oxygen metabolism - cytochrome c oxidase, cbb3-type	ccoNOP	Absent	Present
Oxygen metabolism (Oxidative phosphorylation Complex IV)	Oxygen metabolism - cytochrome (quinone) oxidase, bo type	cyoABCD	Absent	Absent
Oxygen metabolism (Oxidative phosphorylation Complex IV)	Oxygen metabolism - cytochrome (quinone) oxidase, bd type	cydAB	Present	Present
Oxygen metabolism (Oxidative phosphorylation Complex IV)	Oxygen metabolism - cytochrome (quinone) oxidase, aa3 type, QoxABCD	qoxAB	Absent	Absent
Urea utilization	Urease	ureABC	Present	Absent
Halogenated compound utilization	Halogenated compounds breakdown	E3.8.1.2||pcpC||cprA||pceA	Present	Absent
Perchlorate reduction	Perchlorate reduction	pcrAB	Absent	Absent
Chlorite reduction	Chlorite reduction	cld	Absent	Absent
As cycling	Arsenite oxidation	arxA||aioA	Absent	Absent
As cycling	Arsenate reduction	arrA	Absent	Present
Selenate reduction	Selenate reduction	ygfMK||xdhD	Absent	Absent
Nitrile hydration	Nitrile hydratase	nthAB	Absent	Absent
Metal reduction	Metal (Iron/Manganese) reduction	Iron reduction series genes	Present	Present

## Sheet: TableS3
Table S3. Detailed information of identified vOTUs.
vOTUs	Contig length	Gene count	Viral genes	Host genes	Checkv quality	Miuvig quality	Completeness	Completeness method	Lifestyle	T4												T5												T6
										RD10	RD11	RD12	RD1	RD2	RD3	RD4	RD5	RD6	RD7	RD8	RD9	RE10	RE11	RE12	RE1	RE2	RE3	RE4	RE5	RE6	RE7	RE8	RE9	RF10	RF11	RF12	RF1	RF2	RF3	RF4	RF5	RF6	RF7	RF8	RF9
RE12|255814_extended_circular	39229	76	7	3	Low-quality	Genome-fragment	45.95	HMM-based (lower-bound)	Virulent	0	0.534978	2.39251	0.171589	11.3007	0	0.403379	0	0.29536	26.3439	0.932417	0.211814	1.2943	10.2643	59.1414	0	3.84694	0	0	0	2.48067	0	0	0.393587	0	0	0.40921	0.468671	0	0.30138	4.69431	0.0907117	0.333316	3.05557	0	0
RE12|1723525_extended_circular	40052	69	31	0	Medium-quality	Genome-fragment	57.47	HMM-based (lower-bound)	Virulent	0.141197	1.04797	15.3991	0.0840316	0.153729	1.66663	0.197545	0.129182	0	0	0.684943	0.622384	2.17321	0.688585	52.8445	0	17.6956	0.544342	1.56569	1.10483	8.06784	1.75515	3.50234	3.75862	1.05277	0.42011	4.40882	0.22952	1.57442	0.295187	4.08698	0.0888477	0.4897	1.28262	0.646925	0.64837
RE1|870736_extended_circular	54921	89	8	0	Low-quality	Genome-fragment	33.7	HMM-based (lower-bound)	Virulent	0.41188	0.127375	0.244132	0.122563	0.504492	3.5247	0.432189	0.282624	0	3.10738	0.666007	0.302589	0	0	0.082966	478.527	0.88322	0.317576	0.999081	0	0	0.182853	0.785889	0.140566	0.682442	0.510619	0	0.251072	0.082012	0.753445	0.124187	0.518349	0	2.3904	0.188712	0.472834
RE8|119328_extended_circular	36354	57	7	1	Medium-quality	Genome-fragment	67.98	AAI-based (medium-confidence)	Virulent	37.9565	3.07886	3.87258	0.185159	3.30265	5.69209	2.61168	0.284646	63.7436	3.12961	0.503078	0.114282	3.59141	2.57934	12.6801	0.186826	8.22821	30.4654	5.82174	1.49812	25.8419	155.938	781.517	7.22012	0.902111	0.308563	22.9617	0.252867	43.7359	0.813036	14.8214	1.27251	4.31611	1.88413	1.14037	1.02046
RE12|210521_extended_partial	14072	23	12	0	Low-quality	Genome-fragment	22.32	HMM-based (lower-bound)	Virulent	0	0	3.81125	0	25.3777	0	0.562257	0	0	7.41136	0	0	46.133	34.2976	361.312	0	32.1728	0	1.67112	0	21.101	0.71365	0.766803	0.548608	2.66347	0	0.570385	0	0.320081	0	88.2127	0	0	1.21688	0	2.63629
RF8|1164987_extended_partial	21791	29	4	0	Low-quality	Genome-fragment	27.38	HMM-based (lower-bound)	Virulent	0	0	0	0	0	0	0	0	0	0	0.839286	0	0	0	0	0	0	0	4.31663	0	0	0	2.22831	0	0.429998	0.257388	0	0	0	34.4523	18.7797	0	0	0	387.393	2.04293
RE12|1216174_extended_partial	14584	18	8	0	Low-quality	Genome-fragment	23.54	HMM-based (lower-bound)	Virulent	0.775537	0	22.0647	0	39.2633	0.457705	0.542518	0	1.9862	24.379	0	18.5169	4.97356	12.8592	94.46	0	2.77172	0.59797	2.14993	0.4668	11.891	3.44298	0	0.794022	0.642491	0	0.55036	0	0	0	30.8662	0	0.896575	1.56554	0	1.27187
RD6|1633373_extended_partial	16491	26	5	0	Low-quality	Genome-fragment	34.17	AAI-based (medium-confidence)	Virulent	21.6044	2.96943	157.731	2.65316	48.5374	14.5719	10.5552	3.76496	662.558	14.6607	1.66353	14.864	5.71795	40.1371	22.2427	1.64742	89.3872	241.671	5.70395	8.2564	75.4275	17.3556	23.8828	19.6617	13.3526	0	19.4687	0.55744	6.28198	18.6401	50.0442	1.72629	12.6863	3.11513	25.1392	1.79967
RE12|1419896_extended_partial	7740	18	2	0	Low-quality	Genome-fragment	6.18	HMM-based (lower-bound)	Virulent	0	0	0	0	0	0	0	0	0	0	0	0	0	0.356321	69.8597	0	0	0	1.01275	0.879563	0.483573	0	0	0	0	0	0	0	0	0	0	0	0	0	0	0
RF11|2068551_extended_partial	68728	89	21	2	Medium-quality	Genome-fragment	88.61	AAI-based (medium-confidence)	Virulent	38.4266	59.8502	45.4554	12.1446	29.8326	68.0842	71.2603	20.7779	49.3118	42.6271	34.9929	17.0469	20.8438	19.422	17.5029	23.2727	20.9776	30.6436	21.2139	3.61549	13.0338	70.2833	9.42014	12.5245	44.7863	554.852	103.823	37.4515	40.8947	49.2848	78.6965	8.12899	59.1684	87.7854	13.7229	53.546
RF5|642127_extended_partial	14592	16	8	0	Low-quality	Genome-fragment	15.43	AAI-based (medium-confidence)	Virulent	3.488	3.83528	2.75657	82.3417	2.95368	5.9469	7.04887	67.7244	1.19107	3.57362	8.14678	59.2215	7.7048	0.945011	0.520442	97.2796	2.40084	2.09175	8.59501	18.895	2.73601	2.75287	8.13425	8.46492	40.7758	9.99365	47.8551	148.991	33.9542	20.6608	34.5886	228.993	15.2334	8.99692	19.5324	161.947
RE12|839428_extended_partial	26352	37	10	0	Medium-quality	Genome-fragment	70.16	AAI-based (high-confidence)	Virulent	0	0	0	0	0	0	0	0	0	0	1.04103	0	0	0.941913	98.848	0	0	0	0	0	1.2783	0	0.409474	0	0	0	0.609172	0	0	0.224325	0.776468	0.270077	0	1.29963	0	0
RE12|996032_extended_partial	80471	109	15	15	Low-quality	Genome-fragment	43.15	HMM-based (lower-bound)	Virulent	0.98387	1.21706	0.833093	0.250945	1.64505	0.331805	1.17987	0	0.143986	0.942565	0	0.722803	1.71261	4.96947	57.4071	0.0844017	0.837212	0.216744	0.681867	0.422998	1.27132	2.87031	0.402274	0.575612	0.116441	0	0.199487	0.571183	0.111945	0.146921	0.678057	0.176885	0	0	0.386385	0.184404
RE6|1213723_extended_partial	7721	14	3	0	Low-quality	Genome-fragment	7.78	AAI-based (high-confidence)	Virulent	0	0.906042	0	0	1.19618	0	0	0	0	0	0	0	0	15.0023	0	2.19916	1.39612	1.12949	6.09143	0	79.5011	26.6638	6.98773	1.99974	0	0	0	0	0	0	0	0	0	0	0	0
RF10|1135599_extended_partial	8197	12	4	0	Low-quality	Genome-fragment	14.18	AAI-based (medium-confidence)	Virulent	12.4184	8.53428	18.8107	125.231	3.00459	41.5315	109.072	62.4895	26.857	25.4465	14.5026	34.4655	5.75179	3.02809	0.0926472	119.73	9.2053	11.7029	9.56283	7.88999	1.97866	0	27.6442	0	229.766	84.162	5.87517	100.933	128.581	87.9826	29.1225	69.8942	90.1274	86.347	38.5641	97.7571
RD1|754095_extended_partial	107755	183	25	3	High-quality	High-quality	91.86	HMM-based (lower-bound)	Virulent	102.078	113.676	34.4049	278.546	40.3697	201.763	10.7203	30.1062	24.6239	3.56351	1.01836	150.099	26.2862	9.26516	39.7422	41.0016	25.4592	20.7185	2.76431	9.22408	22.9482	18.1269	13.9694	3.36727	53.1745	63.1898	38.9572	79.5956	114.198	19.4752	20.1915	62.8452	95.4388	100.381	25.9695	82.3174
RE1|1726560_extended_partial	6731	14	1	0	Low-quality	Genome-fragment	3.65	HMM-based (lower-bound)	Virulent	21.0044	6.23582	3.98395	31.0012	16.4654	20.8258	7.05281	79.943	18.0746	5.63431	6.79278	47.5272	17.2419	4.50708	0.225651	112.004	32.8299	1.94342	1.16456	32.8709	3.52173	8.95185	11.2217	26.3795	84.2209	19.1652	23.8492	103.113	32.1201	17.5648	9.11966	162.304	52.4503	19.5042	6.15912	117.395
RE12|1277686_extended_partial	14056	17	3	0	Low-quality	Genome-fragment	13.31	HMM-based (lower-bound)	Virulent	0	5.9723	0	0	84.7617	0	2.25159	0	0	2.69811	0	0	3.35425	47.4827	78.4499	0	79.9483	0.620432	2.23069	0	3.8167	0	0.767676	0	0	0	0	0	2.56356	0	50.9499	0	0	0	0	0
RE1|1637419_extended_partial	15899	18	10	0	Low-quality	Genome-fragment	39.59	AAI-based (medium-confidence)	Virulent	0	2.64	3.79495	7.40909	14.1353	3.35879	3.98117	0.650859	0	0	2.30063	2.61313	4.5622	105.12	3.29584	303.945	25.0857	30.9909	66.5588	30.6157	181.348	142.751	593.173	20.6365	0	0	0	0	0	0	0	0	0.82242	0	0	0
RE6|1261166_extended_partial	14946	19	3	0	Low-quality	Genome-fragment	27.16	HMM-based (lower-bound)	Virulent	30.2701	8.42499	2.24274	22.7438	17.3023	3.57295	21.1751	2.42326	26.7457	11.7357	4.89466	26.9636	113.32	4.05957	1.52435	15.6778	2.52428	22.1725	2.62232	74.701	124.211	48.0421	3.97079	223.914	34.7946	6.00428	0.53703	1.53766	1.20545	10.679	0.912685	8.09514	29.3078	1.14572	7.97463	2.97856
RE12|1379371_extended_partial	51918	71	19	5	Medium-quality	Genome-fragment	59.76	HMM-based (lower-bound)	Temperate	0	0	1.03301	0.129652	1.00805	0	0	0.199314	0.111586	0	0.176132	0.0800227	0.209564	0.159362	70.5045	0.0654098	0.155718	0	0	0.0655632	0.720917	0.19343	0	0.0743481	0.180479	0	0	0	0	0	0	0	0	0	0.199627	0
RE12|1900113_extended_partial	52807	66	11	0	Medium-quality	Genome-fragment	50.54	AAI-based (medium-confidence)	Virulent	0	1.45721	1.90429	0	7.75373	0	0	0	0.877662	0	0	0.157351	0	0	78.7372	0	4.64392	0.165145	0.296879	0	3.16589	0.380347	0	0.146193	0	0	0	0	0	0	0.516635	0	0	0	0	0
RE6|1740713_extended_partial	8297	19	1	0	Low-quality	Genome-fragment	8.16	HMM-based (lower-bound)	Virulent	2.72639	21.9217	0	0	76.4358	0	0	0	8.37894	0	0	0	0.874225	2.9916	33.4087	0	53.9165	1.05108	0	0	73.0797	6.05187	0	10.7003	0	0	0	0	7.05729	1.42495	3.28817	0	0	0	0	0
RE6|148214_extended_partial	8390	16	8	0	Low-quality	Genome-fragment	9.46	AAI-based (medium-confidence)	Virulent	0	0	0	0	0	0	0	0	0	0	0	0	0	18.4081	0.181032	2.83333	4.81797	0	7.47428	0	88.3296	37.1057	21.2208	1.84029	0	0	0	0	0	0	0	0	0	0	0	0
RE1|1293730_extended_partial	10294	17	1	0	Low-quality	Genome-fragment	14.66	HMM-based (lower-bound)	Virulent	7.69118	0	0	40.8689	4.78505	0	0	11.0577	0	0	0.888328	184.04	0.704629	0	0	103.587	0.523577	1.69434	1.52296	4.96004	0	0	0	58.4963	1.36537	0	0	20.9859	4.37554	0	0	49.0879	0	0	0	87.2129
RE10|1679135_extended_partial	37431	53	2	1	Low-quality	Genome-fragment	33.41	HMM-based (lower-bound)	Virulent	8.76285	12.7087	0.895513	7.37308	25.003	8.02496	9.93475	3.04101	11.1437	7.3456	6.59614	11.4324	460.135	2.35776	2.96216	12.3387	3.16779	31.3362	83.7664	59.8373	26.2316	15.6951	5.3331	365.159	4.50594	3.74606	1.50103	1.71914	0.240666	1.26343	0.36443	0.855621	1.22264	0.152493	0.415334	0.792881
RE12|640922_extended_partial	31988	33	5	0	Medium-quality	Genome-fragment	71.97	AAI-based (medium-confidence)	Temperate	1.59113	7.43556	17.395	0.631293	4.1384	1.66942	0.989381	0	0.36222	2.66757	0.285871	2.72749	3.17457	6.72495	61.5131	0	5.30748	1.49945	3.9208	0.212824	1.52111	2.04064	1.18065	1.32737	1.31816	1.05203	4.51657	0.431071	4.22425	0	11.7271	0.333737	0	4.10413	0.972013	2.43546
RE6|199616_extended_partial	8343	11	4	0	Low-quality	Genome-fragment	20.82	AAI-based (medium-confidence)	Virulent	0	10.0619	1.60709	0	15.4981	0	0.94835	0	4.16637	50.0024	0	0	120.847	67.4357	23.1206	0	22.9335	1.04528	0	0	97.7997	15.0463	0	4.62664	0	0	0	0	0	0	6.54009	0	0	5.47329	0	6.22523
RE12|1546587_extended_partial	58879	83	26	1	High-quality	High-quality	100	AAI-based (high-confidence)	Virulent	0.288144	1.06931	2.27721	0	0.732012	1.13371	0	0	0.688758	0.161028	0	0.423372	0.985539	3.37251	142.615	0	77.0298	1.92548	6.78971	0.751555	5.14906	1.87617	0.916325	4.65464	0.159142	0.571553	3.81699	0	2.67746	0.401598	4.28605	0	4.77465	0.581663	0.792118	0.756084
RE12|1809392_extended_partial	25419	41	2	0	Low-quality	Genome-fragment	14.32	HMM-based (lower-bound)	Temperate	0.44496	11.2836	11.077	0.529625	30.6417	0	0	0	2.96288	98.657	0.719497	0.490336	1.71213	65.316	133.966	0	13.1461	0.343082	0	0	74.9975	1.97539	0	0.607421	0	0	0.315766	0	0	0	6.43974	0	0	0.898219	0	0
RE12|341058_extended_partial	37717	47	13	2	Medium-quality	Genome-fragment	81.1	AAI-based (high-confidence)	Virulent	0	7.41899	0	0	0	0	0.209775	0	0	0	0	0	7.98096	0	225.833	0	4.14406	0.462433	0	0	0	15.5761	1.43045	0.102341	0	0	0	0	0	0.156731	1.44667	0	0.693356	0	0	0
RE8|610244_extended_partial	13075	26	7	0	Low-quality	Genome-fragment	26.17	AAI-based (medium-confidence)	Temperate	0	0	5.12733	6.69265	7.53458	0.510529	0.605131	0	0	0	0	1.58876	3.05116	20.4603	1.39398	98.9564	10.3054	11.0052	16.1869	12.4962	54.2941	75.2706	269.039	9.74227	0	0.428967	0	0	0	0	0	0	0	0	0	0
RE6|1722009_extended_partial	7441	3	1	0	Low-quality	Genome-fragment	16.26	HMM-based (lower-bound)	Virulent	0	0	0	4.9754	0	0	0	0	0	0	0	0	0	1.48255	0	2.28191	0	0	0	12.8087	202.711	0	0	1.0375	0	0	0	0	0	1.58888	0	0	0	0	0	0
RE6|1770060_extended_partial	46606	84	19	0	Complete	High-quality	100	DTR (medium-confidence)	Virulent	0.242682	1.2008	0.143844	0	3.96333	0	0.509296	0	0.621523	37.6349	0.392415	0.178287	3.57957	0.946804	8.96207	0.14573	49.1487	0.280676	0.336379	0.292143	101.831	3.55536	0	0.662577	0.201049	0.240688	0	0	0.193288	0	2.78053	0	0	0	0	0
RF9|68006_extended_partial	29089	38	3	0	Low-quality	Genome-fragment	23.09	HMM-based (lower-bound)	Temperate	2.72175	1.20244	1.38279	16.661	3.06916	0.458948	0	31.6605	2.19075	0	0	30.8501	5.85981	0.18962	0.0522142	59.1888	3.70566	0.449695	1.07788	13.925	0.0857794	3.79756	0.185473	10.3503	9.34143	0.771253	8.82968	78.6893	4.33556	0.406437	0.703409	78.1704	7.19208	1.37357	0.356295	218.208
RF3|1919519_extended_partial	14224	29	7	0	Low-quality	Genome-fragment	32.94	AAI-based (medium-confidence)	Virulent	11.1323	16.2298	10.3689	12.7773	8.87386	25.8109	17.8	8.00253	4.88752	13.3312	22.5011	10.223	7.64916	5.81676	1.65511	16.2348	32.3973	10.7293	40.2293	4.30753	4.12247	16.2385	35.6546	6.51295	53.6883	78.4688	129.222	39.1002	349.91	1164.08	271.4	75.3035	62.9698	128.413	36.7966	87.1112
RD9|1149591_extended_partial	31765	40	12	1	Low-quality	Genome-fragment	49.79	HMM-based (lower-bound)	Virulent	146.699	41.8434	26.1701	347.106	19.8681	29.2098	12.205	31.4366	79.3358	6.86499	0	165.583	52.4057	5.55665	26.0833	55.6992	11.2833	7.82442	7.64987	19.9316	13.4718	11.8556	42.462	7.77712	118.583	31.7826	50.2838	39.937	44.8078	19.9126	28.3427	38.2011	51.4547	43.8452	22.5132	54.0731
RF11|1036507_extended_partial	44493	68	17	1	High-quality	High-quality	100	AAI-based (medium-confidence)	Virulent	2.03365	5.50298	0.452025	2.49625	8.16471	1.05019	2.84524	3.72122	3.12499	4.47495	1.23315	1.49403	5.70586	0.619855	1.79219	3.20566	20.3508	2.35204	6.34238	0.994556	0.785142	1.69282	0.606301	6.07287	390.447	480.159	173.182	283.367	122.088	342.784	194.836	155	403.352	484.162	93.9918	213.284
RD2|1317352_extended_partial	22928	34	10	1	Low-quality	Genome-fragment	47.27	AAI-based (medium-confidence)	Virulent	4.43972	9.15329	2.92393	17.4682	193.888	16.0125	1.72542	3.15928	3.53745	0.620277	0.398833	14.4962	1.89815	1.08258	2.61667	2.96227	3.52606	0.570533	1.02564	1.03923	2.06776	35.6971	1.17656	0	5.72145	4.89248	2.45051	7.21691	8.25085	0.515651	2.08232	3.72491	5.70292	4.97903	0.904069	5.01585
RF5|721019_extended_partial	21921	32	6	0	Low-quality	Genome-fragment	49.92	AAI-based (medium-confidence)	Virulent	4.64367	4.14863	3.6699	11.0545	3.93231	19.7932	4.33123	48.6221	8.72133	2.81134	6.25732	15.7307	6.61781	2.89367	0.588947	65.9948	7.00728	2.7848	8.93966	18.4784	6.94355	2.29061	5.90691	6.8674	28.2116	13.3048	39.9108	168.162	102.531	128.093	46.9821	633.915	15.2105	26.0388	15.8388	297.176
RE12|1160719_extended_partial	70539	105	16	2	Medium-quality	Genome-fragment	64.94	HMM-based (lower-bound)	Virulent	0.641371	1.98346	0.0950394	0.0954261	17.021	0	0.448664	0	2.54602	0.201615	0	12.4864	0.154243	0.0781956	73.5001	0	9.47452	0.247262	0.22225	0	2.38774	0	0.152971	4.37773	0	0	0	0	0.51083	0	0	0	0	0	0	1.78813
RE12|959150_extended_partial	29335	34	6	0	Medium-quality	Genome-fragment	59.27	AAI-based (medium-confidence)	Virulent	8.48234	21.4624	104.668	9.52267	145.035	0.910198	0	0	8.88701	7.27206	1.2469	26.3426	23.119	62.8958	203.041	0	17.638	0.743207	0.267211	0	264.324	27.7294	0	0.657918	2.55534	0.191196	3.00975	0	3.2244	0.403029	14.1827	0	2.89728	0.389157	0.353307	0.379389
RD8|674489_extended_partial	8176	7	0	6	Low-quality	Genome-fragment	24.59	AAI-based (medium-confidence)	Virulent	453.053	555.298	260.747	201.707	149.862	298.815	296.122	376.533	341.535	363.544	581.594	292.185	210.701	223.305	28.1442	228.03	151.948	267.725	489.916	267.7	69.736	297.246	452.682	213.868	285.939	321.049	262.116	213.628	242.948	420.075	254.434	205.434	358.237	292.519	313.108	186.941
RE12|1539148_extended_partial	21087	29	6	0	Low-quality	Genome-fragment	12.69	AAI-based (medium-confidence)	Virulent	0	2.32223	3.1792	0.159607	4.9638	0	0	0	1.09894	0	0	0	0	0	69.9034	0	4.21729	1.65425	0	0.161422	3.37242	0.23812	0	0	0	0	0	0	0	0	0	0	0	0.541372	0	0
RE12|1295336_extended_partial	22592	20	5	0	Low-quality	Genome-fragment	30.49	AAI-based (medium-confidence)	Virulent	1.00128	3.71577	11.5729	0	3.54298	0	0	0	1.02573	1.67867	0	0.367796	0	0.24415	45.7836	0.901897	0	0.386012	0.693931	0	1.82239	3.55612	0	0.683429	0	0	0	0	0	0	0.603797	0	0	0	0	0
RE11|795487_extended_partial	12084	15	0	0	Low-quality	Genome-fragment	34.83	AAI-based (medium-confidence)	Virulent	0.467992	4.05237	8.87651	0.835559	41.2719	0	0.654757	0	0.479422	24.3227	0	0	9.60403	90.3787	32.3028	0	8.25136	0	0	0	14.2479	0.415528	0	1.27772	0.775413	0	0	0	0	0	6.20866	0	0	0	0	0
RE11|262904_extended_partial	26672	64	1	0	Low-quality	Genome-fragment	7.47	HMM-based (lower-bound)	Virulent	30.7441	9.4421	316.951	42.3985	11.6578	50.0537	28.4778	39.1852	18.6798	30.926	3.77133	29.9073	56.0217	726.601	0.768769	27.247	17.7825	32.0425	22.0418	39.1797	1.63717	24.4737	9.10262	20.6951	29.6855	50.2583	19.8615	58.4197	14.6919	58.0681	16.3659	54.568	31.8655	23.7546	12.8232	49.2376
RE11|1254408_extended_partial	65038	101	14	3	Medium-quality	Genome-fragment	81.41	AAI-based (medium-confidence)	Virulent	5.99972	26.2449	46.5912	0.465738	251.681	5.95282	8.75903	0.397768	9.62023	51.2412	4.07745	93.9673	11.3757	192.899	43.776	0.0522148	111.543	1.87723	5.42359	0.418698	146.98	30.3414	1.49319	27.0042	2.66532	0.344952	9.99635	0.35336	5.54037	1.72694	28.7342	0.0547146	2.11099	7.98647	2.31067	4.79139
RE12|1902858_extended_partial	15302	25	12	0	Low-quality	Genome-fragment	33.33	AAI-based (high-confidence)	Virulent	0	0	0	0	0.201188	0	0	0	0	0	0	0	0	0	50.0761	0	0	0	0	0	0.407665	0	0	0	0.306172	0	0	0	0	0	0	0	0	0	0	0
RE12|1145771_extended_partial	15715	20	2	0	Low-quality	Genome-fragment	45.29	AAI-based (medium-confidence)	Virulent	2.15916	0	6.82557	0.642501	51.9137	0	0.503473	0	0	38.009	0	1.58624	5.76952	100.208	45.6189	0	6.85931	0	0	0	23.0232	0.319519	0	0.245626	0	0	0	0	0	0	15.6244	0	0	0.363217	0	0
RE6|692975_extended_partial	12372	21	2	0	Low-quality	Genome-fragment	14.33	HMM-based (lower-bound)	Virulent	0	0	0	0	0	0	0	0	0	0	0	0	0	0	0	0	0	0	0	0	109.615	0	0	0	0	0	0	0	0	0	0	0	0	0	0	0
RF10|2516989_extended_partial	18027	27	3	1	Low-quality	Genome-fragment	45.29	AAI-based (medium-confidence)	Virulent	149.952	53.5522	36.8167	381.427	19.1269	41.4722	14.9227	38.4599	97.0538	12.3596	1.01453	200.736	78.0589	6.27252	28.1411	59.9051	13.0056	9.19149	5.21794	19.4487	15.5719	12.8128	57.1636	7.06608	148.917	33.6021	60.9987	38.5007	42.4758	23.2824	29.1328	42.441	55.4883	45.9119	22.9972	64.8241
RE6|818694_extended_partial	11681	14	9	0	Low-quality	Genome-fragment	27.84	AAI-based (medium-confidence)	Virulent	0.968275	0	0	3.74567	1.31777	1.14291	0	0	0	0	0	1.06702	1.86288	0	0.520113	12.7918	1.84563	1.49316	0	6.70233	336.123	2.57918	0	3.63497	0	0	0	0	0	0	0	0	0	0	0	0
RE6|1041352_extended_partial	8351	20	3	0	Low-quality	Genome-fragment	9.14	AAI-based (medium-confidence)	Virulent	0	0	3.21111	0	3.31783	0	0	0	0	0	0	0	1.73714	12.2193	0.545632	0.813302	2.25889	2.6107	15.0184	0	95.3156	45.0956	31.0108	5.08443	0	0	0	0	0	0	0	0	0	0	0	0
RE12|2079218_extended_partial	14852	16	2	0	Low-quality	Genome-fragment	39	AAI-based (medium-confidence)	Virulent	6.09234	0.942035	27.9859	0	2.48741	0	0	0	9.75178	0	0	0	2.93029	5.01373	145.218	0	0	0.58718	0	1.83351	9.66039	5.07128	0	2.33908	0	0	0	0	0	0	1.83692	0	0	0	0	0
RE12|2049878_extended_partial	18483	24	3	4	Low-quality	Genome-fragment	1.07	AAI-based (medium-confidence)	Temperate	5.8134	19.3028	59.1219	2.18512	30.6476	11.5569	20.9756	1.11973	5.32851	2.05186	2.96849	15.7346	4.90548	8.65441	122.401	1.46987	38.6374	8.4929	8.48201	4.97243	11.7452	11.4101	16.9303	5.01218	5.32305	2.73109	8.25097	0.248681	5.11756	2.55864	35.4254	1.73277	6.7207	36.1322	6.44857	1.60571
RE12|634961_extended_partial	8113	11	4	0	Low-quality	Genome-fragment	11.39	AAI-based (high-confidence)	Virulent	0	0	11.5686	0	20.1115	0	0	0	1.42816	5.84318	0	0	1.34108	0	49.8923	0	0.332165	0	0	0	0	0	0	0.951561	4.61979	0	0	1.13309	0	0	0.840687	0	0	0	0	0.91453
RE12|1413833_extended_partial	23000	23	0	4	Low-quality	Genome-fragment	24.22	AAI-based (medium-confidence)	Temperate	0.737636	3.64985	26.5245	0	13.9205	0.870674	0	1.79965	2.01507	0	0	1.98699	1.8922	0.959277	119.528	0	26.7142	1.13749	0.340811	0.147996	3.3089	2.61978	0.46915	5.53827	1.22219	0	0.697953	0	0	0.514037	14.5306	0.154719	1.13701	7.19699	0	1.29036
RE12|771875_extended_partial	11555	16	2	0	Low-quality	Genome-fragment	17.47	HMM-based (lower-bound)	Temperate	0	0	0	0	0	0	0	0	0	0	0	0	0	0	55.0102	0	0	0	0	0	0	0	0	0	0	0	1.38926	0	0	0	8.85395	0	0	0	0	0
RE12|409803_extended_partial	37021	53	17	0	High-quality	High-quality	96.41	AAI-based (high-confidence)	Temperate	0.611028	1.51169	2.17303	0	1.16421	0	0	0	0.625952	0.384153	0	0	2.54706	1.19194	92.5978	0	0.436755	0.471127	0.846941	0	2.08942	2.17012	0.291468	0	0	0	0	0	0	0	1.1054	0	0	0	0	0
RE12|903016_extended_partial	28373	33	16	0	Medium-quality	Genome-fragment	73.95	AAI-based (medium-confidence)	Virulent	2.3918	9.61571	64.7408	0	5.85921	3.29371	3.62517	0.364713	0.204185	0	1.28918	6.15	1.40605	1.65244	92.6101	0.239378	32.293	2.30522	4.69661	3.47913	5.05678	5.48615	13.8812	5.84994	1.65123	0.395358	2.82891	0.323996	3.49247	1.87512	30.2887	0	0.691273	14.4847	3.65286	0.261501
RD7|111993_extended_partial	25850	37	5	1	Low-quality	Genome-fragment	21.65	HMM-based (lower-bound)	Virulent	53.38	29.2271	57.5739	46.4809	9.88481	32.2784	59.991	20.4158	19.2738	521.738	26.1775	22.983	17.6776	7.14819	10.5468	29.6899	25.6454	60.3877	40.0271	9.61258	28.7652	32.6332	25.8804	19.1134	34.798	36.2344	56.5112	18.1365	11.8485	31.3294	75.1969	32.7632	16.6923	36.8754	22.2521	36.8826
RE12|966508_extended_partial	11659	9	2	4	Low-quality	Genome-fragment	9.48	HMM-based (lower-bound)	Virulent	1.94021	7.80017	0.575005	2.30938	5.01699	1.7176	2.7145	0.887555	1.98759	1.62641	0.784325	0.356344	2.17747	4.73097	40.7756	1.45636	2.54253	3.73994	2.01698	0.291955	3.85233	3.87607	0.462752	1.98645	2.0092	0	0	0	0	0.507027	1.17	0	0	0	0.444474	0
RF7|447476_extended_partial	18109	25	8	0	Low-quality	Genome-fragment	21.41	HMM-based (lower-bound)	Virulent	34.0393	27.8138	50.3475	13.3815	19.5503	39.4413	66.8479	37.1429	27.5127	45.0261	35.8526	51.3907	31.643	15.5342	6.54211	21.9408	41.5188	26.2457	31.1659	15.4134	19.2217	63.7741	45.2855	57.5516	39.3245	50.7943	128.537	64.2157	47.7554	49.9447	70.8075	34.1921	95.672	555.383	35.7704	47.7321
RE9|1469381_extended_partial	37503	53	2	1	Low-quality	Genome-fragment	33.48	HMM-based (lower-bound)	Virulent	9.80158	9.88625	1.25131	7.7179	28.1565	5.33971	11.6035	2.89721	17.3014	6.82588	6.58347	12.7398	434.012	3.08862	3.40197	13.311	5.02999	35.6942	96.1464	62.1731	29.8406	21.1545	5.46673	402.335	5.12191	3.43976	0	2.08352	0.600509	0.788127	0.36373	0.853979	1.91761	0.1522	0.829074	0.593519
RE12|1309747_extended_partial	12243	17	8	0	Low-quality	Genome-fragment	33.23	AAI-based (medium-confidence)	Virulent	0.923828	1.14278	0	0	4.27476	0	0	0	0	1.54883	0	1.01804	1.77737	2.02739	41.4979	0	0	0	0	0	17.0181	0	0	1.26113	0	0	0	0	0	0	0	0	0	0	0	0
RF5|2355205_extended_partial	7627	17	5	0	Low-quality	Genome-fragment	14.81	AAI-based (medium-confidence)	Virulent	3.70736	7.33767	1.75796	26.0354	1.61457	16.6288	6.22427	73.265	12.9129	0.621551	2.39791	20.1548	3.80409	0.723199	0.79657	85.4885	1.76665	1.14341	5.13875	19.1908	2.12653	2.6334	4.9517	7.59146	19.6567	8.08918	44.1997	172.959	46.654	11.626	22.3564	666.728	14.5723	17.2129	16.9861	322.485
RE12|1400573_extended_partial	24799	28	12	0	Medium-quality	Genome-fragment	55.87	AAI-based (medium-confidence)	Virulent	0	0	0	0	0.744848	0	0	0.417275	0.934447	0.38232	0	0	0.292489	29.0261	75.5785	0	1.73868	0.351659	0.632175	0.27452	0.251546	1.61982	0	0.311303	0.377842	0	0.647321	0	0	0	0	0	0	0	0	0
RE6|288722_extended_partial	7076	16	5	0	Low-quality	Genome-fragment	8.53	HMM-based (lower-bound)	Virulent	0	6.92041	3.7897	0.475641	53.9491	0	0	0	2.45619	16.7488	0	0	3.07523	27.283	17.4939	0	94.0684	0	0	0	171.733	0.709616	1.52494	0	0.662104	0	0	0	2.54617	0	7.71113	0	0	1.61333	0	0
RE6|1060051_extended_partial	8593	10	5	0	Low-quality	Genome-fragment	22.13	AAI-based (medium-confidence)	Virulent	0	1.6282	0	0	0	0	0	0	0	0	0	0.483489	1.68822	21.8246	4.24213	102.752	5.95859	6.08923	26.4542	8.71476	120.943	54.928	159.477	8.53486	0	0	0	0	0	0	1.58745	0	0	0	0	0
RF2|1756151_extended_partial	31407	44	5	0	Medium-quality	Genome-fragment	81.63	AAI-based (medium-confidence)	Temperate	0	0	0	0.107162	3.23473	0.212538	0.251921	0.329481	1.29122	0.15094	0.582319	1.05827	0	0.175625	0.096721	0.216254	2.23091	0.27767	0.499166	0.108381	0.834209	0	0.515353	0.368708	6.26523	62.5039	31.6898	50.0512	333.006	4.14084	84.0427	0.113304	57.8698	279.519	11.0549	13.3475
RE12|1745862_extended_partial	18810	40	3	0	Low-quality	Genome-fragment	17.79	HMM-based (lower-bound)	Temperate	2.40519	1.48762	4.98968	0	81.179	0	0	0	0	2.52024	0	2.20873	0.385616	0.29324	118.335	0	13.1806	0	0	0	2.05615	0	0	0	0	0	0.853424	0	1.6762	0	0	0	0	0.303453	0	0
RD2|1253050_extended_partial	41138	59	20	0	Medium-quality	Genome-fragment	61.48	HMM-based (lower-bound)	Virulent	1.23722	1.19036	3.74816	0	207.145	0	0.19233	0	2.95737	17.6311	0.666861	16.3607	2.6448	46.5263	3.30444	0	2.94784	0.105994	0	0	32.4506	0.854409	0.262299	0.469153	3.64436	0.13634	0.975552	0	1.0949	0	2.48693	0	0.476773	0.555006	0	1.17233
RE12|1546794_extended_partial	8045	7	1	0	Low-quality	Genome-fragment	14.13	HMM-based (lower-bound)	Virulent	0	15.6519	44.1655	0	43.6244	0	0	0	0	2.35703	4.54665	1.03284	1.80322	20.2259	440.743	0	15.0737	0	1.9487	0	20.7807	4.36901	0	0.959604	3.49413	0	0	0	1.11975	0	36.4551	0	0	2.83801	0	0
RE12|977355_extended_partial	12203	19	9	0	Low-quality	Genome-fragment	30.07	AAI-based (medium-confidence)	Virulent	0	4.01285	4.39497	0	4.28877	0	0	0	0.474747	2.33086	0	1.36183	1.7832	4.29407	83.2678	0	12.5876	0.714643	0	0.55788	3.37388	20.1623	0	0.632632	0.383926	0	0.657744	0	0.738209	0	5.03027	0	0	0	0	0.912019
RE11|1852210_extended_partial	302736	404	17	15	Medium-quality	Genome-fragment	70.91	AAI-based (medium-confidence)	Virulent	20.922	7.18651	197.508	38.2105	12.5895	42.3791	21.065	31.4642	13.2425	21.359	6.91718	22.7125	43.8461	445.615	0.755075	22.9959	12.6582	26.1996	22.3454	31.5839	2.05645	18.6429	9.44543	12.5846	24.9468	41.741	16.8093	45.9279	12.4531	46.122	11.6252	39.848	22.8052	20.3064	12.4616	38.7111
RE5|1989535_extended_partial	13005	21	3	0	Low-quality	Genome-fragment	29.13	HMM-based (lower-bound)	Virulent	14.35	4.3033	18.5577	87.4728	5.44463	2.56638	29.2026	122.139	7.57299	5.83231	8.43778	129.383	9.7605	3.18099	4.26285	115.157	1.2433	3.35286	13.863	214.364	1.82274	10.4247	8.71202	82.8098	8.64599	3.88148	23.4529	89.418	3.46342	4.5455	18.8803	198.38	5.02716	4.82795	7.17249	72.741
RE5|2000429_extended_partial	10705	16	3	0	Low-quality	Genome-fragment	28.2	AAI-based (medium-confidence)	Virulent	23.2442	19.6045	8.14123	41.815	12.3661	41.7782	11.8256	25.6163	12.4472	24.356	13.6676	13.5835	45.3976	17.7764	0.283766	55.8324	4.78301	8.55379	24.8962	519.887	6.87618	22.5147	13.6078	47.2359	11.3789	8.38299	5.2485	5.58177	16.8302	23.1929	5.09705	8.97527	12.8253	8.53128	31.9496	3.11893
RE6|2142234_extended_partial	7403	11	5	0	Low-quality	Genome-fragment	12.71	AAI-based (medium-confidence)	Virulent	0	0	0	0	0	0	0	0	2.3477	0	0	0	20.0859	11.1762	4.41111	15.1379	7.28043	56.5444	78.3547	30.8067	2095.15	21.0264	29.1516	18.7708	1.89857	6.06105	8.67373	4.96704	13.9938	0	0	2.88412	12.3639	1.54207	0	1.00224
RE6|539626_extended_partial	10648	18	3	0	Low-quality	Genome-fragment	18.46	AAI-based (medium-confidence)	Virulent	0	0	0	0	0	3.76136	0	0	0.544078	0	0	0	27.9293	11.1374	3.99399	9.88676	9.61724	82.7198	51.5313	19.5002	2188.72	27.3509	42.5619	23.2006	4.83993	1.05348	14.3222	3.02166	1.69203	7.21718	3.84325	4.34456	4.29797	0	0	0.696805
RE5|430769_extended_partial	67282	92	16	7	Medium-quality	Genome-fragment	76.36	AAI-based (medium-confidence)	Virulent	16.054	43.7729	29.4935	155.371	10.2037	3.27399	4.35104	85.2055	29.448	3.17062	3.39781	208.404	25.658	3.52518	0.361192	66.0695	8.25093	5.18462	2.6796	211.726	4.61724	13.6572	1.44339	204.182	21.9344	1.25043	7.27704	73.8485	7.09615	3.16297	3.64938	94.4611	13.5067	11.2832	2.46467	63.7946
RE12|2004408_extended_partial	13916	13	5	0	Low-quality	Genome-fragment	4.73	HMM-based (lower-bound)	Virulent	1.21915	0	1.92699	0	0	0.959351	0	0	0	0	2.62847	0	0.521231	2.3782	52.6624	0	0	0	0	0.489208	0.717228	1.4433	0	0.277379	0	0	4.03745	0	1.94201	0	0	0.51143	0	0	0	0
RD7|1437584_extended_partial	12622	11	2	0	Low-quality	Genome-fragment	15.32	HMM-based (lower-bound)	Virulent	56.9016	28.266	57.3626	53.3296	6.34155	43.3658	76.4755	22.9555	35.801	541.587	23.908	21.066	19.5387	9.39555	9.68691	37.936	21.5639	70.1284	40.988	12.4053	21.0539	27.8472	40.6074	16.514	58.6466	70.6537	72.4937	31.6815	7.13703	34.6574	98.8869	35.5233	34.704	49.2923	28.7394	34.0941
RE12|2131001_extended_partial	19505	26	7	0	Low-quality	Genome-fragment	30.89	HMM-based (lower-bound)	Virulent	0	0.717308	5.15559	0	52.8749	0	0.811287	0.265265	0	0.243044	0	0.426005	0	0.706978	135.105	0	2.62508	0	0	0	0.767568	0	0	0	0	0	0	0	0	0	0	0	0	0	0	0
RE12|1809238_extended_partial	6768	9	5	0	Low-quality	Genome-fragment	8.34	HMM-based (lower-bound)	Virulent	7.52023	23.7733	31.6973	18.8969	18.6498	10.8491	22.2118	28.2858	6.84792	21.0132	9.45791	20.2574	86.8099	74.9789	42.1905	40.6429	134.981	41.2331	91.4972	50.2941	19.3558	53.4174	35.0754	148.857	76.8381	56.3526	136.383	45.5019	39.2652	77.7359	29.2249	98.848	83.0752	32.8916	13.0166	57.0062
RE12|68775_extended_partial	9631	12	3	0	Low-quality	Genome-fragment	23.04	AAI-based (medium-confidence)	Virulent	2.34875	50.1187	0	0	62.652	0	0	0	13.2337	3.93776	0	0	3.38911	8.3044	47.7847	0	45.3292	0	0	0	61.0143	6.25635	0	3.20632	0.97291	0	0	0	0.93535	0	1.41636	0	0	0	1.07613	0
RE8|369017_extended_partial	8129	15	0	1	Low-quality	Genome-fragment	11.49	AAI-based (medium-confidence)	Virulent	13.218	8.60567	15.6693	1.65611	6.43817	30.3827	38.9326	0	0.712676	19.8277	87.7435	0	0.892293	88.8886	3.08293	0.835513	6.29871	39.6936	113.785	1.25621	0.460433	54.9748	371.009	0	15.5611	34.4984	32.5837	11.874	18.2849	57.4489	51.181	2.62654	13.6724	16.15	110.285	2.73819
RE6|812405_extended_partial	29453	36	13	0	Medium-quality	Genome-fragment	64.47	AAI-based (medium-confidence)	Virulent	0	0	0	0	0	0	0	0	0	0	0	0	1.23136	0	0.0515689	0	0	0	0	0	116.447	0	0	0	0	0	0	0	0	0	0	0	0	0	0	0
RF5|1483159_extended_partial	6479	8	3	0	Low-quality	Genome-fragment	6.3	HMM-based (lower-bound)	Virulent	38.4055	4.31891	3.10418	99.7378	16.6307	24.7267	2.44238	194.055	16.9893	6.58514	12.7026	67.9718	36.3848	8.08774	0	139.423	5.82311	6.05704	14.5183	315.751	8.08766	6.97502	19.9854	42.2998	77.3731	9.52249	3.71652	163.877	16.6847	25.5471	4.21083	246.609	41.3723	9.69093	31.1935	117.953
RD1|454594_extended_partial	46787	73	21	1	High-quality	High-quality	100	AAI-based (medium-confidence)	Virulent	33.7231	0.897115	0.573149	761.29	4.60599	25.5382	1454	13.3809	27.1174	5.77538	2.34538	10.2118	27.9831	2.65258	1.62316	8.41963	0.921573	5.12582	3.68586	48.4537	4.07989	5.68803	0.576573	6.35263	0.600814	0	0	4.71554	3.36945	4.16947	9.47554	3.42261	5.86891	0	1.88292	10.4664
RD2|2073538_extended_partial	19259	19	5	0	Low-quality	Genome-fragment	24.11	AAI-based (medium-confidence)	Virulent	6.16644	21.0677	19.8415	0	461.971	3.466	12.3248	0.268654	8.12193	4.43067	2.84888	45.5177	12.2404	22.4827	25.4734	0	170.151	2.94331	3.66311	0.353488	55.5822	21.1185	0.560281	24.2516	1.70286	0.582454	2.50058	0	14.9679	0.613887	8.14535	0	2.37628	5.92757	1.88353	1.54101
RE6|1444408_extended_partial	33901	31	10	1	Low-quality	Genome-fragment	44.53	HMM-based (lower-bound)	Virulent	0.333631	5.15881	0.395504	0	0	0	0	0	0	0	0.539479	0.367654	0	0	2.66577	0	10.5724	2.05794	2.081	0	238.181	0.888689	0.636586	11.7277	0	0	0	0	0	0	0.201188	0	0.385701	0	2.44577	0.43772
RE8|528290_extended_partial	28419	43	24	0	Low-quality	Genome-fragment	30.82	AAI-based (medium-confidence)	Virulent	0	0.98463	2.35898	0	3.35818	0.469768	0	0	0.407709	0	0	0	3.82848	55.1215	1.60336	12.6665	4.55163	14.4226	24.8242	11.1391	89.6456	52.8291	296.919	10.051	0	0	0	0	0	0	0	0	0.920205	0	0	0
RE6|720901_extended_partial	16864	26	11	0	Low-quality	Genome-fragment	36.72	AAI-based (high-confidence)	Virulent	18.4438	9.12608	0	30.3354	16.6124	4.74988	29.5577	0.613615	28.5132	7.87097	2.71123	21.6797	114.841	3.10724	1.8013	12.0823	3.99498	17.0651	3.25371	92.243	120.441	42.8759	2.23948	212.181	34.4489	1.33035	0	2.453	0.534177	12.6193	1.21332	5.27533	36.0542	0.33847	9.52597	3.51973
RE12|1420388_extended_partial	8054	21	3	0	Low-quality	Genome-fragment	8.88	HMM-based (lower-bound)	Virulent	0	0	0	0	0	0	0	0	0	0	0	0	0	0	86.6545	0	0	0	0	0	1.54907	0	0	0	1.16341	0	0	0	0	0	3.38738	0	0	0	0.643423	0
RE12|1644107_extended_partial	40963	65	24	1	High-quality	High-quality	100	AAI-based (medium-confidence)	Virulent	3.45142	4.26943	18.4935	0.657302	18.413	2.28138	1.15891	0	3.67714	8.2167	0.223237	3.44841	16.5563	29.5566	808.485	0.248708	12.6312	3.6192	4.97534	0.58168	26.5282	17.6515	1.44881	12.627	1.48684	0	4.11482	0	0	0	19.1479	0.0868718	0.319207	0.97541	0.50603	0.0905644
RE1|1213652_extended_partial	19197	25	4	0	High-quality	High-quality	100	AAI-based (medium-confidence)	Virulent	0	1.82204	0.698441	3.68174	0.962207	10.7793	0	1.61713	0.603567	0.493887	2.38174	2.38062	1.13353	0.287328	0	542.551	0	0	5.30825	0.177315	0	5.7544	16.5817	0.60322	5.36912	5.25902	2.50866	18.1968	1.64241	6.15869	0	9.26845	5.78961	7.73073	0	3.28522
RE3|1236075_extended_partial	9554	15	2	0	Low-quality	Genome-fragment	19.72	AAI-based (medium-confidence)	Virulent	12.4303	4.39327	14.0339	1.4091	27.3895	25.1524	4.14072	8.1233	19.4041	10.4199	0	3.044	3.79603	14.722	19.3951	0.355447	34.1299	937.891	4.92274	7.4819	32.1242	8.40903	45.7414	29.0894	9.31714	1.17411	5.04069	0	14.6148	7.42486	55.6833	0.372465	4.10582	0.597442	13.0177	1.55319
RD2|467277_extended_partial	20087	39	8	0	Low-quality	Genome-fragment	44.39	AAI-based (medium-confidence)	Virulent	11.8245	9.40309	3.00373	1.34042	200.927	11.6309	15.3617	1.03032	23.9382	4.24804	2.73145	11.7894	2.34716	1.64759	0	0.338123	14.0867	2.38783	0.78047	2.0335	37.8254	8.49914	0	1.92164	0	0	0	0	4.7089	0	0	0	0	0	0.515968	0
RF3|1729140_extended_partial	16886	23	5	0	Low-quality	Genome-fragment	37.58	AAI-based (medium-confidence)	Virulent	5.69339	24.0283	5.5582	6.77671	7.29262	62.8539	5.6227	7.66019	4.8032	7.29923	15.1631	18.2069	12.0275	7.51299	2.60849	16.0888	26.4921	7.23031	38.0652	5.84587	10.1961	15.4628	31.6314	5.48621	45.5021	60.1198	120.734	45.4574	245.135	751.618	218.517	111.27	57.689	99.3805	26.6993	96.0073
RE6|164667_extended_partial	11219	12	9	0	Low-quality	Genome-fragment	12.52	AAI-based (high-confidence)	Virulent	0	1.24709	3.58534	0	1.92085	0	0	0	0	0	0	0	0	44.0028	0.676914	5.44852	6.96592	2.33197	17.4674	1.21362	104.756	77.4289	49.0519	4.47278	0	0	0	0	0	0	0	0	0	0	0	0
RE10|1924363_extended_partial	11101	15	8	0	Low-quality	Genome-fragment	24.77	AAI-based (high-confidence)	Virulent	5.60376	23.3164	21.7407	46.9933	14.6982	10.8236	17.1057	22.372	20.3531	36.7255	2.47125	8.98215	323.762	13.9126	1.98392	2.75322	4.36963	43.9928	23.302	15.3315	3.14686	13.5697	3.8881	160.645	6.75261	0.505247	29.6446	0	8.52065	11.1828	31.3346	25.3242	8.24517	0	14.0045	9.35719
RE6|1642950_extended_partial	59653	83	25	0	High-quality	High-quality	97.2	AAI-based (medium-confidence)	Virulent	2.84405	2.11087	1.12383	0	2.21915	2.0142	0.53054	0	16.8984	21.6951	0	1.39293	7.72122	0.554793	0.292808	0.0569283	0.632456	10.2334	3.81072	0.741803	178.464	5.63967	2.0802	7.76492	0	0.376091	1.07642	0	0.226519	0.594581	0	0	0.986379	0	0	0.124379
RE6|618869_extended_partial	20429	39	14	0	Low-quality	Genome-fragment	27.65	HMM-based (lower-bound)	Virulent	0	0	0	0	0	0	0	0	0	0	0	0	0.887641	21.465	1.78436	124.009	12.136	2.77474	16.1155	6.66485	132.28	49.158	113.826	4.91263	0	0	0	0	0	0	0	0	1.28011	0	0	0.363189
RE12|1784617_extended_partial	14944	26	1	7	High-quality	High-quality	100	HMM-based (lower-bound)	Temperate	1.51371	13.5754	66.3939	0.675649	19.7767	0.893357	6.88283	1.03868	2.32602	0.317222	3.67149	3.61416	3.39763	4.24466	138.887	1.81796	31.5577	2.62604	6.81895	1.13889	4.42477	11.0881	8.30368	5.68256	3.76208	0.375318	2.14841	0.922719	2.41123	1.18672	23.733	0	0.874977	19.4798	3.81447	3.72369
RD2|679997_extended_partial	31807	46	7	0	Low-quality	Genome-fragment	30.98	AAI-based (high-confidence)	Virulent	91.2103	57.1837	35.831	83.699	105.017	108.29	72.6358	80.033	52.2743	80.3335	146.624	61.7831	36.1452	46.3888	7.92689	62.5656	50.9198	57.8516	98.3312	47.1947	14.4739	33.6254	174.543	46.6011	82.1912	98.925	32.553	92.9187	86.6651	123.406	67.1177	46.6535	76.4634	61.1945	117.957	55.2847
RE6|731689_extended_partial	17152	34	7	0	Low-quality	Genome-fragment	37.31	AAI-based (medium-confidence)	Virulent	0	0	0	0	0	0	0	0	2.70212	0.552772	0	0	32.9856	11.7379	3.32073	12.8694	13.0406	65.3347	67.1806	31.7529	2341.25	26.3475	31.7699	22.0546	2.73149	1.96201	17.3145	2.41181	5.25207	3.44649	3.1812	12.8632	12.1974	0.665574	3.0213	1.08145
RD9|822194_extended_partial	14501	28	4	0	Low-quality	Genome-fragment	24.05	AAI-based (high-confidence)	Virulent	39.7788	28.9451	3.23618	32.2614	71.5455	19.3336	24.0074	13.9153	33.1596	12.0958	7.56729	124.057	123.8	2.85282	0.942675	7.72816	2.23007	34.5801	18.379	109.387	28.9944	38.7821	1.86029	88.3747	41.0317	3.09427	1.66053	0	2.7955	26.9053	4.70346	5.64417	40.5768	3.54263	26.0875	28.9088
RE12|881180_extended_partial	10504	17	5	0	Low-quality	Genome-fragment	21.21	AAI-based (high-confidence)	Virulent	0	0	1.27646	0	7.62025	0	0	0	0	4.0618	0	0	0.690541	30.7194	228.248	0	15.3933	0	0	0	1.18776	0	0.513636	0.36748	0	0	0	0	0	0	13.6358	0.677557	0	0	0	0
RF5|640359_extended_partial	10525	19	1	0	Low-quality	Genome-fragment	9.61	HMM-based (lower-bound)	Temperate	1.07462	0	0	21.4249	0.292502	0	3.00697	45.718	0	0	0	30.3948	0.689164	1.04814	0	32.2655	0.512086	0	0	41.0733	0.237077	0	0	13.9364	0.445135	0.532897	0	125.336	0	0	0	379.689	3.10586	0	0	138.17
RE12|449597_extended_partial	17185	24	12	0	Low-quality	Genome-fragment	46.7	AAI-based (medium-confidence)	Virulent	0.658157	0	1.56043	0	1.79143	0	0	0	1.68558	0	0	0	8.86368	3.85162	123.427	0	11.9179	1.26866	8.2104	0.594223	0.725993	0	1.2558	1.34769	1.63575	0	0.934123	0	2.3589	0.687975	21.035	0.414144	1.52175	1.32859	0	0.431748
RE6|2025951_extended_partial	10469	16	6	1	Low-quality	Genome-fragment	25.63	AAI-based (medium-confidence)	Temperate	0	0	0	1.60743	0	0	0	0	0	0	0	4.36535	0	1.05375	0	14.9215	0	0	1.4975	8.77882	402.804	2.87778	0	0.737416	0	0	0	0	0	0	0	0	0	0	0	0
RD6|497640_extended_partial	20022	38	4	0	Low-quality	Genome-fragment	20.29	HMM-based (lower-bound)	Virulent	61.0092	1.04818	6.69662	2.85764	4.92032	20.6703	5.92754	0.516832	1118.91	9.47073	0.45672	0	3.80388	3.03038	15.2478	1.18727	14.1324	152.664	14.0941	22.9511	39.5061	109.594	28.0244	14.0735	33.9293	0	152.736	3.44349	46.792	3.54296	29.2959	1.95504	7.18371	1.71051	5.17643	0.926429
RF5|605921_extended_partial	10397	14	1	1	Low-quality	Genome-fragment	7.19	HMM-based (lower-bound)	Virulent	41.8824	29.6051	14.1856	93.5527	35.8284	42.3739	24.3519	142.326	17.8308	32.8288	69.4827	109.889	32.4406	13.5283	3.65216	199.243	26.1787	18.4532	49.7596	149.619	7.43987	20.7669	59.676	53.0904	67.1417	51.788	25.4759	153.404	48.5206	54.5827	34.1123	182.427	55.9649	38.43	45.8551	135.946
RE8|1463640_extended_partial	27774	39	16	0	Medium-quality	Genome-fragment	67.39	AAI-based (medium-confidence)	Temperate	0	3.27436	1.44826	0.242358	5.5422	2.16305	0	0	0	0	0	1.04711	4.43971	75.9635	4.89443	18.2183	20.4729	15.2286	33.0209	8.82413	117.826	72.1349	315.664	6.11508	0	0	0	0	0	0	0	0	0	0	0	0
RE6|2265257_extended_partial	25116	41	4	0	Medium-quality	Genome-fragment	56.19	AAI-based (medium-confidence)	Virulent	0	1.94971	0	0	0	0	0	0	0	0	0.728177	0.165417	0	0	2.93298	0	11.2661	2.43054	1.24839	0	227.508	0	0	8.14542	0	0	0	0	0	0	0.27156	0	0	0	1.44429	0
RE12|585452_extended_partial	23055	32	11	0	Low-quality	Genome-fragment	38.71	HMM-based (lower-bound)	Virulent	0	26.3983	105.845	0	140.342	0	1.37273	0	0	13.5709	0	0.720819	1.25846	16.7473	105.803	0	28.2869	0.37826	0.679996	0	29.3303	7.84058	0.234015	0.669704	0.203212	0	0.348144	0	1.95367	0	0	0	0.283575	0.24758	1.12386	0
RE12|1483675_extended_partial	14011	32	3	0	Low-quality	Genome-fragment	17.01	HMM-based (lower-bound)	Virulent	7.26528	1.49787	0.47848	0	1.31836	2.38212	0	0.369281	19.8473	2.36843	0	0	2.07079	4.33047	313.452	0	5.77015	23.3409	3.35678	3.15829	27.1589	48.7395	6.93127	2.47948	1.67192	0	5.15581	0	18.324	0	4.38116	0.507962	2.33311	1.22217	5.54792	0
RD10|406302_extended_partial	10531	8	0	2	Low-quality	Genome-fragment	16.87	AAI-based (medium-confidence)	Temperate	7398.34	6058.91	3500.64	2664.13	2353.01	5248.98	6188.57	4243.95	4764.06	5257.8	9656.76	2840.89	3141.48	3686.04	548.857	2623.95	2810.77	3699.15	7924.25	3011.19	1332.92	3463.52	6785.15	3099.44	5320.34	6042.28	4568.47	3222.39	4576.03	7693.1	4455.89	2656.65	5759.32	5423.94	6852.26	3450.52
RE5|2203965	7914	10	0	0	Low-quality	Genome-fragment	17.78	AAI-based (medium-confidence)	Temperate	1109.03	766.381	528.593	535.847	148.6	517.043	695.831	736.154	535.851	1310.04	635.512	740.209	746.058	548.517	144.132	956.906	445.056	818.194	1607.55	1030.12	213.454	751.854	910.112	582.854	1194.05	1414.59	1002.04	866.538	852.004	1221.28	965.245	976.639	1221.82	1068.89	1113.82	1021.9
RE6|1214315	9661	23	5	0	Low-quality	Genome-fragment	7.12	HMM-based (lower-bound)	Virulent	0	0	0	0	0	0	0	0	0	0	0	0	0	1.71282	0.471647	0	1.11576	0	3.24548	0	77.2255	17.1515	1.11691	0	0	0	0	0	0	0	0	0	0	0	0	0
RE5|2469590	8095	8	1	0	Low-quality	Genome-fragment	15.37	AAI-based (medium-confidence)	Virulent	0	5.18509	0	170.049	1.52123	0	0	121.44	11.4507	5.85617	0	74.932	7.16832	3.74764	0	71.3169	0	1.07731	4.84166	269.958	0.616488	1.24058	1.99947	268.46	16.784	0	1.98306	68.7042	1.66925	0	0	101.986	42.8048	0.705121	6.40164	123.736
RE2|2114317	5301	3	0	0	Low-quality	Genome-fragment	7.8	AAI-based (medium-confidence)	Virulent	3.20046	47.508	56.9099	0	141.123	2.51846	7.46282	0	9.83589	12.5199	0	52.5107	11.6307	13.0066	23.6382	0	144.884	1.64512	2.95742	0.642126	131.799	10.4195	0	24.7576	2.65141	0	6.05656	0	0	3.34546	18.013	0	3.69996	9.69093	0	0.699828
RE12|1242308	7367	20	1	0	Low-quality	Genome-fragment	4.07	HMM-based (lower-bound)	Virulent	0	0	0.910002	0	0.417888	0	0	0	0	0.643487	0	2.2558	0.984586	1.12308	26.6991	0	1.4632	0	0	0	4.40316	0.681585	0	1.04792	0	0	0	0	0	0	0	0	0	0	1.40685	0
RE2|1240620	5342	12	1	0	Low-quality	Genome-fragment	3.82	HMM-based (lower-bound)	Virulent	4.23453	14.4049	8.78471	1.26006	508.871	2.49913	19.2544	3.87421	4.33796	2.66225	0	12.4436	8.8258	5.67898	13.3632	0	214.398	4.08124	0	0.637197	27.7923	15.0393	1.00996	8.67092	0	0	1.50252	0	21.9223	0	5.10707	0	1.22385	4.27402	0	0.694457
RE9|2404567	5321	9	4	0	Low-quality	Genome-fragment	11.79	AAI-based (high-confidence)	Virulent	6.37686	13.1471	10.0793	21.5056	6.94286	2.50899	19.3304	19.4475	2.17754	18.7093	0	4.68478	163.581	9.32956	0.713615	5.10572	1.51937	36.0566	16.2047	14.7134	1.64129	7.54932	3.04185	136.381	6.16338	0	13.576	4.31908	0.846491	5.5548	15.3817	18.7256	8.60079	2.14545	5.8434	10.458
RE10|1037496	16457	26	20	0	Low-quality	Genome-fragment	37.72	AAI-based (high-confidence)	Virulent	12.0272	26.355	13.8504	23.9277	17.5844	19.875	20.6732	13.8334	27.4583	20.1641	5.55657	9.84567	364.281	14.5798	3.46097	7.01598	13.4276	43.7179	21.9103	18.2016	2.19851	4.57669	6.55676	213.676	4.83963	2.38568	39.0178	1.11718	7.11604	9.69851	30.2544	36.1107	10.7262	0.693681	14.17	20.9644
RE6|1807175	6532	8	1	2	Low-quality	Genome-fragment	3.75	HMM-based (lower-bound)	Virulent	0	2.14193	15.3949	0	8.01223	0	0	0	0	3.62873	0	0	1.11045	4.64439	281.356	0	8.66379	0	0	0	58.8283	0	0	0	0	0	1.22879	0	0	0	24.0158	0	0	0	0	0
RD5|2272752	5675	6	1	0	Low-quality	Genome-fragment	2.52	HMM-based (lower-bound)	Virulent	76.7315	34.5155	36.6209	51.5965	9.76466	47.0496	23.7014	227.018	41.855	35.0844	24.1703	101.029	34.5098	9.71954	0.401461	41.2899	45.5869	4.61011	9.66882	61.1804	3.07783	33.6224	6.65491	45.5719	43.7546	33.6031	56.5741	59.1251	22.2233	19.7916	15.624	53.2996	54.1459	42.2439	7.3052	62.1022
RE5|769077	30511	35	0	30	Low-quality	Genome-fragment	17.48	AAI-based (medium-confidence)	Virulent	32.9923	19.9473	10.327	89.6811	13.4198	11.8141	26.1912	273.36	22.9751	16.1587	24.5762	100.628	33.5202	14.0106	0.796491	159.162	9.53898	11.2901	18.4977	438.221	4.4162	15.3051	14.5	91.2151	41.1521	15.2576	32.3573	107.863	20.9627	26.5434	13.4125	309.889	36.2129	14.4051	17.6638	110.159
RD5|641983	15620	17	0	12	Low-quality	Genome-fragment	21.45	AAI-based (medium-confidence)	Virulent	175.232	268.267	256.228	158.801	94.6043	338.459	414.346	304.411	196.202	152.354	680.857	177.143	148.598	115.826	7.00114	229.585	119.733	159.118	458.175	54.48	17.2526	214.737	429.339	83.0321	258.847	344.353	375.116	276.9	229.534	337.201	439.708	221.212	200.488	353.733	357.64	279.541
RE5|631115	13498	24	3	0	Low-quality	Genome-fragment	16.32	HMM-based (lower-bound)	Virulent	35.6122	3.62786	0	94.7503	5.01769	19.2867	0.586167	46.7646	5.5796	18.9651	1.35493	66.7915	42.7211	0.612962	0	79.7536	2.79507	0.64608	60.9763	109.193	2.58804	0.743998	0.799411	22.0196	38.8743	0.831048	8.91961	22.4745	6.00646	3.06564	1.51589	95.6991	30.03	10.5719	2.30351	21.4375
RE6|311226	5017	7	2	0	Low-quality	Genome-fragment	12.61	AAI-based (medium-confidence)	Virulent	51.8517	12.5493	10.69	38.909	69.3402	23.9492	45.7346	10.3129	70.4393	11.3388	10.9362	33.1243	316.624	19.7897	4.38977	16.2453	5.90858	102.557	70.3088	151.3	107.926	125.106	21.5078	358.533	87.7804	5.58974	1.59985	0.916159	8.08005	29.457	0	1.41859	16.9408	1.13772	17.5595	2.21833
RD12|1516752	21307	23	5	1	Low-quality	Genome-fragment	18.3	HMM-based (lower-bound)	Virulent	165.089	171.384	168.646	124.314	68.9202	156.329	50.5018	170.467	231.386	61.1845	26.1797	89.1097	163.064	29.1234	3.56422	99.4541	118.256	113.374	14.7156	36.2645	15.8682	140.219	16.7121	56.5223	239.233	119.772	233.934	181.421	145.651	86.8388	75.865	95.197	221.538	164.753	16.052	130.932
RE1|300337	17658	34	12	0	Low-quality	Genome-fragment	33.25	AAI-based (medium-confidence)	Temperate	0	1.18851	1.13897	3.24022	6.6251	2.26815	0	0	0.656172	0	1.03573	1.17641	0.616161	26.8639	2.36542	208.472	20.7555	16.7916	22.6397	11.7589	74.5406	85.8769	308.901	10.2741	0	0.317632	0	0	0	0	0	0	0	0.323251	0	0
RE3|1452312	19420	19	5	0	Low-quality	Genome-fragment	21	HMM-based (lower-bound)	Virulent	219.278	230.183	216.447	146.272	100.664	216.548	78.2245	220.335	309.953	70.5471	23.5439	122.371	203.56	37.6338	4.73177	136.397	151.395	141.006	12.5128	51.8824	20.9435	173.235	14.1687	85.6675	316.036	152.204	319.901	216.564	174.647	122.673	71.6468	124.237	279.423	234.843	22.1481	191.985
RE12|1554446	6572	15	3	0	Low-quality	Genome-fragment	8.44	HMM-based (lower-bound)	Virulent	0	6.38669	0	5.12117	14.0532	3.04709	8.42735	0	16.7489	3.60664	0	2.52868	36.9736	3.35718	69.7954	1.03346	2.05025	12.6061	1.19273	19.1638	103.082	43.55	1.64188	33.4784	0	0	0	0	0	1.79897	0	0	0	0	0	0
RE12|690349	8811	10	1	0	Low-quality	Genome-fragment	17.36	AAI-based (medium-confidence)	Virulent	0.641836	6.35165	8.36952	0.381981	4.89163	0.757595	0	0	0.657512	1.07606	0	3.30068	2.05807	0.939027	108.428	0.385421	2.75266	0	3.55857	0	2.97355	2.84942	0	1.31427	0	0	0	0	0	0	0.774088	0.403873	0	1.94347	0	0
RD9|356491	25492	43	6	2	Low-quality	Genome-fragment	30.81	HMM-based (lower-bound)	Temperate	22.4061	1.64653	0.525968	66.9377	10.3859	0	0	15.6284	0	0	0.717437	295.152	1.70723	0	0	189.433	1.26856	0	3.68993	18.8275	0.195766	0	0	104.026	2.02164	0	1.88917	42.0114	11.1315	0	0.535108	77.335	0	1.34347	0	170.995
RF5|76700	6578	7	5	0	Low-quality	Genome-fragment	11.48	HMM-based (lower-bound)	Virulent	6.01801	1.06348	2.0383	30.1873	2.34006	5.07386	6.01405	88.8815	4.40357	4.32402	9.73109	26.5269	7.16744	2.93485	0.11545	45.9469	3.68709	5.303	4.76659	123.675	1.89665	3.05335	4.92116	34.0347	11.3957	0.852652	3.66059	39.8287	8.90154	3.59466	8.29491	104.949	6.95725	4.33867	3.15119	37.7859
RD2|639818	5756	13	0	0	Low-quality	Genome-fragment	13	AAI-based (medium-confidence)	Temperate	3.92996	6.07675	2.32939	11.6943	202.172	15.0759	9.62206	1.79778	18.1168	0	3.17736	10.105	0	1.91655	0	1.17997	17.7909	2.27262	5.44729	2.36547	45.5177	11.3405	0	4.02363	0	0	0	0	2.34756	0	0	0	0	0	0	0
RD2|488108	5128	4	0	3	Low-quality	Genome-fragment	2.6	AAI-based (medium-confidence)	Virulent	792.921	843.068	448.414	318.317	250.345	456.9	484.476	628.589	588.598	609.212	1050.33	436.689	338.768	346.354	44.4284	353.634	309.004	488.929	907.987	393.627	119.701	471.965	689.133	373.355	494.269	462.656	505.567	301.166	387.352	687.053	317.882	299.782	535.47	519.816	531.552	310.355
RD2|38209	8102	12	4	0	Low-quality	Genome-fragment	16.37	AAI-based (high-confidence)	Virulent	0	34.5374	109.223	0	169.85	0.823891	0	0	1.4301	0.585111	0	3.07674	1.79053	9.5312	213.15	0	15.6329	1.07638	0.967496	0	28.7959	14.8741	0	3.81141	0.578258	0	0	0	2.77967	0	0.841828	0	2.42082	0	0.639611	0
RE5|1867470	19794	33	8	0	Low-quality	Genome-fragment	32.63	AAI-based (medium-confidence)	Virulent	27.4275	16.6106	2.37081	32.6463	56.6133	13.4893	20.7855	8.88734	35.7072	8.62184	2.3099	91.3034	119.828	4.31927	0.6906	10.1223	2.58675	35.0259	13.4644	128.803	26.2836	31.963	2.18055	75.0784	34.7935	1.41678	2.0275	0.928841	2.95819	14.9324	2.75659	4.1349	34.0202	0.865104	20.1588	17.2426
RE8|1474489	34904	82	18	1	Low-quality	Genome-fragment	35.92	AAI-based (medium-confidence)	Virulent	0	0.601268	7.68277	0.192851	6.3505	4.58985	3.17354	0	0	0.54327	0	0.476119	4.05232	53.9669	2.17577	13.3293	5.79056	16.4901	32.5637	8.58194	85.822	70.4907	359.228	7.29889	0	0	1.14979	0	0	0	0	0	0	0	0.296936	0
RF5|2194299	42228	43	0	33	Low-quality	Genome-fragment	20.89	AAI-based (medium-confidence)	Temperate	36.5604	21.2047	13.4943	89.1859	12.1749	15.1751	17.9871	262.327	23.1854	16.8392	35.5141	101.534	35.642	13.5845	1.09703	132.692	9.89159	7.64112	21.1615	463.011	6.44077	10.7017	14.9484	83.2733	44.4895	16.0713	29.6516	119.949	17.8128	19.3184	12.2752	326.713	37.0025	17.1666	19.6348	104.982
RE12|620582	5513	9	5	0	Low-quality	Genome-fragment	7.94	HMM-based (lower-bound)	Virulent	0	0	6.08016	0	6.70106	0	0	0	0	11.1786	0	12.8113	8.55204	20.0103	315.04	0	16.6198	0	0	0	21.0464	10.0188	0	3.50082	0	0	1.45591	0	0.817011	0	11.1345	0	0	3.10609	1.87997	8.075
RD2|1542836	8591	11	5	0	Low-quality	Genome-fragment	16.53	AAI-based (medium-confidence)	Virulent	7.24099	13.0286	1.5607	2.74234	200.317	4.66197	4.60487	0	16.1844	3.31084	0	25.1473	3.37723	0.963073	0.795584	1.58116	11.92	4.06043	1.82485	1.98109	41.3888	10.5206	0	1.79723	0	0	0	0	5.7672	0	0	0	0	0	0	0.431823
RD7|588574	5439	5	3	0	Low-quality	Genome-fragment	12.44	AAI-based (medium-confidence)	Virulent	36.3913	9.00328	39.4425	24.7518	2.26408	12.2728	24.7298	15.2204	21.303	289.368	26.9004	19.0964	17.3368	4.05651	6.00395	11.2386	27.7462	42.4896	7.20597	16.2717	27.5261	23.0798	7.93562	2.83876	15.5048	13.4057	32.4659	20.2818	0	31.5189	33.8579	5.23409	3.60608	28.3351	4.76386	18.4159
RE8|1596350	9610	17	1	0	Low-quality	Genome-fragment	4.12	HMM-based (lower-bound)	Virulent	94.1555	52.412	113.71	22.4142	92.2613	442.464	117.734	9.15276	31.9508	71.0346	188.408	43.6646	23.3982	88.3912	6.63809	15.1952	81.0418	53.9945	166.398	10.9803	6.7509	124.355	317.763	8.83664	96.041	117.311	33.4088	32.5237	63.7428	160.55	83.0382	21.8474	38.778	88.5001	200.598	58.6772
RE12|940730	9038	10	1	1	Low-quality	Genome-fragment	9.66	HMM-based (lower-bound)	Virulent	15.6429	43.3449	11.8681	19.3641	103.55	5.16997	0	9.73202	28.8449	41.9612	3.03533	30.7988	29.6943	49.1287	48.4832	9.01777	53.0741	2.89471	4.3365	9.03892	56.8731	4.44456	4.77559	26.9064	21.2533	0.620574	2.66424	12.714	12.9574	2.61625	10.565	6.29967	13.0207	15.7888	5.16034	6.56745
RE3|1745530	53608	91	9	0	Complete	High-quality	100	DTR (high-confidence)	Temperate	1.47689	0.782967	1.25056	0	1.0337	0.249036	7.37957	0	0.648411	1.41488	0.682319	0	1.08244	0.102892	0.169996	0.886868	0	746.444	2.0471	1.6509	0	8.2426	9.76229	0	0.174789	5.02201	1.7967	0.514442	0.504124	0.88217	6.10699	0.265522	0	0	25.0368	1.17644
RE9|378359	5156	6	4	0	Low-quality	Genome-fragment	3.35	AAI-based (medium-confidence)	Virulent	40.5824	65.1254	65.0115	31.3325	141.51	33.6607	87.4687	19.0663	92.1361	33.0994	49.6595	57.2106	68.9331	47.0708	80.126	18.4419	44.4264	74.421	48.6495	68.6591	147.12	58.4318	28.2527	171.439	22.7165	26.1074	32.6911	7.13168	11.3565	12.6116	46.2989	11.0428	17.7521	15.4987	12.0608	16.5487
RD1|714333	18874	28	7	1	Low-quality	Genome-fragment	46.34	AAI-based (medium-confidence)	Virulent	135.732	35.9526	25.5742	371.978	12.5596	25.4642	15.5106	32.6219	72.4398	3.51637	0.4845	173.237	52.6503	5.1143	22.774	50.9194	8.56687	10.3962	6.64504	11.7227	13.4849	12.2378	40.5914	7.56703	124.362	40.4148	35.297	33.8506	45.3425	18.1659	27.8255	32.2406	55.4229	42.9443	24.4362	55.4287
RD6|1855763	13325	22	2	0	Low-quality	Genome-fragment	24.07	HMM-based (lower-bound)	Virulent	30.5572	3.14997	66.9141	3.53612	44.8214	11.5219	20.7822	4.27122	602.594	12.4518	2.05879	9.35374	6.53218	56.9177	47.475	1.52913	141.973	257.206	1.7648	12.5172	77.5256	12.0585	33.2014	20.8571	17.5799	0.841838	10.8425	2.06966	19.2674	16.8581	112.608	1.60234	11.2848	1.28509	26.0565	2.78408
RF9|1272508	23966	51	6	0	Low-quality	Genome-fragment	23.58	HMM-based (lower-bound)	Virulent	1.88775	0.58379	1.11892	24.1546	0.770737	0.278527	1.98083	66.278	2.90078	0	0	15.9486	15.8894	0	0.0316878	124.553	11.2445	0.363882	0.327074	26.7018	0.208231	0	0	7.24778	16.03	0.468058	11.7219	160.334	7.8935	0	2.27672	199.263	8.45668	1.19084	0.216228	315.16
RE12|1016023	5666	7	1	0	Low-quality	Genome-fragment	3.16	HMM-based (lower-bound)	Virulent	0	0	0	0	31.5139	0	0	0	0	4.18335	0	0	1.92026	22.3905	58.4383	0	93.6967	0.769572	0	0	8.14717	0	0	0	1.65374	0	0	0	0	0	16.8526	0	0	0	0	0
RD7|525008	5803	4	1	0	Low-quality	Genome-fragment	10.6	HMM-based (lower-bound)	Virulent	27.2869	15.6716	20.7947	17.3994	2.12206	6.90177	24.542	8.91608	0.998335	366.796	9.45488	19.3305	3.74984	3.80206	6.28168	17.5561	16.2536	12.0225	12.1571	7.03893	6.23487	14.7098	8.36758	2.6607	40.3675	3.8661	19.3642	13.4652	0.776181	20.3737	16.4547	8.58511	10.1397	9.83622	8.93008	7.03217
RE8|1148403	23238	37	1	1	Low-quality	Genome-fragment	12.49	HMM-based (lower-bound)	Temperate	133.605	58.7027	201.079	38.5256	133.805	580.249	156.28	17.8122	36.1492	106.488	239.649	62.3962	36.2079	120.462	10.5231	14.0292	128.608	103.578	269.519	22.1185	13.9591	202.898	466.667	28.5705	124.394	177.159	56.9914	55.7783	141.882	252.605	126.795	44.4089	75.1183	166.292	365.947	88.1231
RF10|1609308	18454	22	5	0	Low-quality	Genome-fragment	28.42	HMM-based (lower-bound)	Virulent	144.644	42.457	16.3476	46.5068	39.8711	62.5774	30.0122	128.972	140.956	64.2215	147.171	64.3882	85.4896	37.661	0.740746	91.459	59.7266	29.7719	75.1838	16.9697	22.6483	22.0397	59.3493	32.8395	259.716	155.005	52.1933	165.633	167.436	132.297	157.817	89.4742	227.8	94.6481	95.7573	200.426
RD1|1411521	30164	46	6	5	Low-quality	Genome-fragment	23.65	AAI-based (medium-confidence)	Virulent	11.2489	35.4833	19.5581	124.298	9.49171	1.32777	3.93453	74.2721	22.0871	2.04308	1.51579	167.209	21.0409	2.01148	0.327297	53.9271	7.77258	4.77036	2.33881	157.421	3.43298	10.6537	1.78863	165.078	17.3957	1.30159	7.18453	52.1137	5.67428	2.15574	5.42673	70.0758	10.8371	6.05539	1.37439	52.5156
RE12|718097	9629	28	3	0	Low-quality	Genome-fragment	5.11	HMM-based (lower-bound)	Virulent	0	0	2.78491	0	1.91832	0	0	0	0	0	0	0	0	0	40.8541	0	0.559736	0	0	0	2.98008	0	0	0	0	0	0	0	0	0	0	0	0	0	0	0
RE12|211179	6333	11	4	0	Low-quality	Genome-fragment	11.99	AAI-based (high-confidence)	Virulent	0	4.41847	5.2929	0	7.29176	0	0	0	0	39.6732	1.44394	4.59219	0.572671	11.3226	57.2	0	11.9147	0	0	0	12.2142	0	0	0	1.47957	0	0	0	0	0	7.53883	0	0	1.80261	1.63655	0
RD9|1031211	5616	11	1	0	Low-quality	Genome-fragment	11.51	AAI-based (medium-confidence)	Virulent	92.6424	149.478	76.3987	100.681	76.1971	118.86	74.6689	177.81	133.074	76.8148	52.1051	128.722	110.429	38.3045	5.54427	220.107	107.487	60.561	39.0816	68.4903	29.1022	75.9981	40.3489	39.8647	140.151	112.854	134.346	150.593	111.482	48.4198	75.2974	122.926	133.876	116.883	41.5234	162.501
RF9|126152	5326	2	1	0	Low-quality	Genome-fragment	8.35	HMM-based (lower-bound)	Virulent	23.3599	1.31347	0	46.7624	7.51437	6.26659	0	65.0879	1.08775	13.3512	0	32.7627	16.3427	8.28515	0	65.0368	6.57774	0	0	88.8365	0.937002	0	0	49.2828	69.4928	1.05309	3.01406	114.78	93.0266	18.8686	0	114.252	98.2024	6.43029	5.83792	167.867
RE12|1387973	7674	12	3	0	Low-quality	Genome-fragment	20.91	AAI-based (medium-confidence)	Virulent	1.47386	0	0	0	0.40117	0	0	0	0	0	0	0	5.19859	1.43754	36.4178	0	18.6118	1.13641	6.12873	0	1.30062	0	0	0	7.32611	0	12.5511	0	8.21716	0	36.44	0	8.51945	4.46283	0	3.86739
RE12|2117442	8351	13	4	0	Low-quality	Genome-fragment	19.83	AAI-based (high-confidence)	Virulent	0	5.02614	0	0	0	0	0	0	0	0	0	0	8.68572	1.65125	102.306	0	14.1987	0	9.38648	0	0.298795	0.601274	1.29212	0.924441	0.561016	0	0	0	1.07872	0	11.4342	0	2.34864	0	0	0
RE5|995615	11465	14	0	12	Low-quality	Genome-fragment	3.41	AAI-based (medium-confidence)	Virulent	668.859	662.64	597.014	491.415	285.168	772.608	714.261	798.777	654.372	439.118	870.178	502.25	372.953	267.252	89.7538	454.668	304.625	416.453	748.654	382.105	169.759	407.305	525.641	422.193	656.275	607.594	704.984	582.514	568.473	655.335	629.401	409.394	705.39	589.963	533.806	621.912
RF3|1973272	7320	11	6	0	Low-quality	Genome-fragment	18.01	AAI-based (medium-confidence)	Virulent	85.7553	52.5622	49.4556	29.4263	20.1874	52.8907	62.6913	48.7713	59.358	55.0476	83.6992	32.9191	35.1772	42.1977	5.7061	33.8666	30.9245	36.3366	103.873	34.8761	16.5327	45.9594	76.6535	31.6394	52.4828	77.3884	47.1499	40.1868	44.3034	96.101	39.134	34.5158	66.9859	53.0247	72.9179	40.5442
RF8|2415628	5961	6	2	1	Low-quality	Genome-fragment	6.54	HMM-based (lower-bound)	Temperate	560.683	464.727	214.806	206.082	157.002	329.223	339.791	386.249	371.256	378.546	685.718	219.545	257.965	257.239	33.6335	227.308	177.668	244.317	566.76	243.259	86.4396	246.808	441.683	260.96	395.333	429.994	319.119	260.623	332.468	528.567	290.623	198.791	434.32	398.341	446.84	274.454
RF9|798741	56493	82	6	1	Medium-quality	Genome-fragment	79.14	HMM-based (lower-bound)	Virulent	57.6603	32.4436	7.47617	47.363	24.7952	35.6841	10.6441	92.2277	41.8403	11.4123	15.0538	26.181	54.3113	5.07716	0.0672145	79.2886	38.5912	23.6957	7.909	25.4873	4.59357	20.1763	6.97169	16.8085	141.647	63.9377	48.8751	138.722	119.993	38.4029	36.0988	89.7616	100.915	62.0375	12.934	136.918
RE8|1194224	8049	17	7	0	Low-quality	Genome-fragment	18.26	AAI-based (medium-confidence)	Virulent	131.386	158.18	173.243	63.9759	59.6669	159.229	95.35	33.4263	127.397	188.469	138.604	50.5842	43.2557	146.308	47.081	22.7831	42.5203	169.562	254.179	10.1496	57.1961	109.795	233.934	58.5067	112.921	127.519	269.244	61.6732	110.8	199.03	132.19	15.9159	190.067	113.464	231.132	31.8022
RD12|716470	13440	29	6	0	Low-quality	Genome-fragment	18.61	HMM-based (lower-bound)	Virulent	19.3556	322.191	408.524	9.51592	102.848	28.8065	22.9592	20.7884	20.2594	3.52721	3.40195	175.891	1.61907	0.410405	2.48623	4.04279	5.61427	1.62217	0	1.01307	1.11395	19.4274	10.0358	0.574406	2.44013	5.00781	16.1246	1.36797	11.0594	3.5187	11.1645	3.7068	5.83735	15.7139	1.92787	8.83283
RE3|182239	5631	7	6	0	Low-quality	Genome-fragment	8.3	HMM-based (lower-bound)	Virulent	5.0215	0	15.4771	0.597697	22.9622	22.5232	2.81019	2.75653	220.17	11.7862	19.4874	5.90249	14.1694	10.2853	13.082	1.80924	27.7573	638.843	0	10.2764	35.45	1.78343	22.9951	12.3389	23.2963	0.996048	7.12702	0	11.9983	12.5976	50.8721	1.26391	12.7715	0	55.2171	1.97645
RF5|1233446	5503	7	0	2	Low-quality	Genome-fragment	4.22	AAI-based (medium-confidence)	Virulent	38.0234	57.2051	15.8371	101.526	21.2586	54.5852	46.0088	283.005	47.3742	38.7654	56.4985	116.266	57.3369	20.5478	4.9681	136.998	9.30441	21.3939	47.0063	483.091	11.3358	33.7608	46.0795	86.2767	76.6226	43.8263	80.2208	105.241	38.4693	39.7461	61.9707	309.1	67.7187	41.4898	42.3761	138.199
RE12|1975020	5449	8	4	0	Low-quality	Genome-fragment	6.44	HMM-based (lower-bound)	Virulent	0	0	0	0	74.5775	0	0	0	0	0	0	0	0.665576	3.54293	52.8214	0	95.9444	0	0	0	10.5323	0	0	1.41678	0	0	0	0	0	0	20.0271	0	0	0	0	1.36164
RE7|609402	20708	32	4	0	Low-quality	Genome-fragment	23.02	HMM-based (lower-bound)	Virulent	36.0483	1.35128	5.50356	0.650112	31.6659	13.5386	9.93404	0.249855	63.2265	6.18097	0.44159	1.20377	3.32759	7.59134	39.7538	0.819959	37.9996	160.872	3.40679	3.78066	130.136	4445.84	50.805	16.9626	5.2036	0.270849	54.2642	0.221961	114.41	1.99826	160.071	2.57765	10.7343	2.20512	9.25916	5.91187
RD4|544976	9243	26	1	0	Low-quality	Genome-fragment	0.78	HMM-based (lower-bound)	Virulent	15.9078	2.27055	5.07713	49.5214	0	34.6649	2144.3	3.35865	3.13391	0	0	3.14642	4.31613	1.19352	0.985952	15.4311	0.291556	15.096	2.54419	13.9942	1.48478	1.62974	0	11.2756	2.0275	0	0	8.95106	1.94923	6.39557	45.7503	1.53999	2.82931	2.47018	0	6.82316
RF2|120307	6788	10	3	0	Low-quality	Genome-fragment	18.47	AAI-based (medium-confidence)	Virulent	95.8087	72.1403	39.5049	55.0361	88.4389	94.4042	88.5855	80.7961	105.83	61.457	118.549	80.179	77.4712	21.9399	7.60772	58.0332	181.033	52.6742	81.9894	42.6241	15.6228	54.7395	114.454	121.691	412.737	191.695	328.721	188.92	352.345	233.392	254.211	245.343	260.049	169.019	132.072	549.801
RF5|564380	8210	11	0	1	Low-quality	Genome-fragment	9.44	AAI-based (medium-confidence)	Virulent	173.583	150.818	138.816	102.486	57.3718	172.367	61.6776	163.854	246.27	45.6157	25.6178	67.8098	123.688	31.9126	5.27253	90.5861	107.663	97.1927	12.412	38.1437	18.6915	134.552	11.8288	55.9489	233.396	116.137	201.395	168.515	116.308	79.923	68.9526	97.5236	218.989	164.078	24.6167	126.07
RF5|396372	11485	18	6	0	Low-quality	Genome-fragment	19.88	AAI-based (medium-confidence)	Virulent	13.7872	0	11.6743	132.457	13.4026	1.16241	2.75562	276.157	15.1328	3.3021	0	138.909	33.7884	3.36185	1.32247	147.547	1.87713	0.37966	4.09507	107.882	2.06398	11.3672	0	53.1024	64.4526	2.93012	26.5568	166.886	26.6682	6.1765	0.593861	278.547	25.6162	5.96391	2.70725	107.24
RE9|75156	11687	15	7	0	Low-quality	Genome-fragment	19.27	HMM-based (lower-bound)	Virulent	10.1617	0.598575	0	57.3082	11.0636	0	4.73899	7.08343	15.3669	2.83939	0	26.6618	91.2344	0.707946	0.129961	13.3664	2.53644	13.8046	0	193.976	44.6226	0	0	280.079	7.21578	0.959826	0	0	0	0	0	0	0	0	0	0
RD5|1053325	25680	32	6	0	Low-quality	Genome-fragment	25.02	AAI-based (high-confidence)	Virulent	110.77	59.3859	41.5083	85.8446	109.213	130.488	80.7229	97.3147	58.4297	90.4548	162.378	68.9201	37.0016	45.1062	7.77765	60.6985	55.4082	65.8814	120.876	53.8157	16.2268	39.4973	199.8	50.9557	95.7808	97.192	31.2557	96.8316	92.6093	141.34	81.5378	58.2002	88.5967	61.7918	122.288	60.3852
RE11|84313	92781	132	4	8	Low-quality	Genome-fragment	21.73	AAI-based (medium-confidence)	Virulent	22.0647	8.74623	180.712	31.3053	12.5757	37.3397	21.4045	32.1211	12.1136	21.153	8.279	26.8225	39.5581	397.959	0.957666	24.633	10.6887	22.4644	20.6989	29.0565	1.3178	17.6429	10.8741	11.3577	21.9657	44.19	19.0321	39.5329	14.7581	42.8793	9.99759	38.0089	20.153	18.7023	11.059	28.269
RE6|109102	6085	13	4	0	Low-quality	Genome-fragment	9.37	AAI-based (high-confidence)	Virulent	36.2454	10.3467	2.20345	14.9338	32.3795	12.0669	27.3055	9.35317	41.891	14.0231	3.00557	23.214	149.599	4.98556	1.37284	7.81318	6.64302	25.0803	1.28819	95.0969	135.116	62.7139	1.77329	236.612	45.4261	2.7652	0	0	2.22063	15.5436	0	1.75441	47.2744	1.87607	14.4776	2.43865
RF9|1191360	5574	8	2	0	Low-quality	Genome-fragment	10.81	HMM-based (lower-bound)	Virulent	9.13113	1.25503	0	36.8324	4.9708	5.98777	1.41946	51.0531	8.3148	4.2524	0	37.2678	11.061	6.43218	0	31.0716	4.35121	1.56455	0	59.2356	1.11914	1.80166	0.967927	27.0076	63.0389	1.00623	1.43998	83.2855	37.9793	10.6054	0	97.0392	80.9311	4.09613	1.85939	168.385
RD9|730147	5768	6	0	5	Low-quality	Genome-fragment	1.38	AAI-based (medium-confidence)	Virulent	951.033	1016.34	653.197	410.201	353.332	675.849	732.499	758.878	889.892	833.381	1368.18	480.432	475.976	437.021	50.9534	494.555	429.831	650.884	1286.96	553.548	170.444	646.807	1051.36	494.546	666.043	805.139	656.811	419.953	506.798	866.011	462.346	396.695	759.422	672.922	788.819	476.587
RE6|1509438	9641	15	1	0	Low-quality	Genome-fragment	3.71	HMM-based (lower-bound)	Temperate	1.17316	2.17681	6.95362	2.09457	11.1763	0	0	0	0.600907	132.27	0	0.861865	1.50471	88.9652	75.4625	0	10.9013	0	0	0	109.867	3.12493	1.11923	0.800748	0	0	0.832534	0	0	0	6.36702	0	0	1.1841	0	0
RF2|413931	14867	19	8	0	Low-quality	Genome-fragment	15.58	AAI-based (medium-confidence)	Virulent	7.98813	26.8209	11.7242	11.0928	14.2882	19.7557	25.5452	13.2247	5.84517	27.1036	19.6827	9.78083	4.14706	9.0898	2.80949	23.9843	12.3259	6.45246	31.1078	2.06062	1.67837	12.4965	37.3787	4.15417	21.4289	70.1706	103.658	29.6799	323.567	83.8979	77.9904	40.2121	32.1021	38.0095	56.4676	72.3642
RE6|966614	21742	27	12	0	Medium-quality	Genome-fragment	52.75	AAI-based (medium-confidence)	Temperate	0	0.643506	2.1584	0	5.52224	0	0.727815	0	0	0	0	2.10196	4.00337	57.9694	3.45799	60.6028	22.0625	13.437	25.2371	9.23699	118.381	68.8221	226.807	5.68118	0	0	0	0	0.41433	0	0	0	0	0	0	0
RD11|522541	7455	14	2	1	Low-quality	Genome-fragment	4.36	HMM-based (lower-bound)	Virulent	127.441	146.386	116.904	82.1657	51.2064	120.878	44.5751	137.418	181.066	49.5995	3.67986	71.8908	101.188	16.6474	1.73176	66.0512	86.3943	66.0932	13.669	37.4407	13.0536	94.2956	19.5401	44.5286	154.597	89.5293	176.571	151.054	112.982	85.6383	49.404	63.4855	177.148	130.927	26.4146	104.501
RD9|51687	15493	17	6	2	Low-quality	Genome-fragment	26.57	AAI-based (medium-confidence)	Virulent	195.649	213.574	161.834	125.128	76.1051	164.154	70.4749	181.005	245.3	74.9655	18.8874	106.728	178.609	34.0001	3.18614	112.884	144.718	112.859	12.6487	39.3274	18.6019	133.528	18.1083	70.7572	274.275	127.43	294.264	203.518	170.655	87.376	79.6817	93.4823	230.826	184.211	14.3827	165.699
RE11|1938990	9278	9	5	0	Low-quality	Genome-fragment	12.74	AAI-based (medium-confidence)	Virulent	34.7432	6.78594	18.0642	1.45102	4.64541	34.5342	48.6084	0.557663	1.87325	24.0145	122.215	0	2.34537	196.485	3.76522	1.83011	6.09958	37.5977	125.04	0	1.34471	73.603	348.905	1.66415	6.56452	37.4803	39.7949	17.8346	20.8752	78.3687	87.4799	2.30127	19.7305	27.0694	130.14	3.99848
RE12|617016	9533	23	2	0	Low-quality	Genome-fragment	12.77	HMM-based (lower-bound)	Virulent	0	8.8059	23.2069	0	2.58351	7.70238	3.31987	0	2.43086	0	0	1.74326	1.52176	2.60372	54.171	0.35623	2.82687	2.7444	1.64453	0	2.22485	3.16033	0	2.83437	2.94873	0	5.05179	0.964307	1.41745	1.2402	13.5938	0	5.48648	5.98758	0.543599	0
RD7|124084	5135	6	0	0	Low-quality	Genome-fragment	8.12	AAI-based (high-confidence)	Temperate	1536.32	1536.71	1233.74	614.138	497.609	2098.1	1440.66	467.524	1037.95	1602.65	2286.56	461.984	451.31	792.734	158.541	300.245	607.719	815.186	2311.14	331.442	246.851	731.429	1929.04	516.421	1188.83	1934.39	1767.85	692.812	1254.33	2240.24	1973.76	269.575	1734.08	1748.51	1674.23	621.309
RE9|1666469	12598	15	5	1	Low-quality	Genome-fragment	33.94	AAI-based (high-confidence)	Virulent	10.7735	7.77407	1.06429	17.098	21.5046	4.23887	17.5852	5.7498	5.51834	8.2785	2.90346	3.29784	140.198	8.09994	6.57071	27.4953	13.2625	21.1132	44.1772	42.4205	19.6086	56.9961	20.5565	308.543	30.1229	8.90418	12.7424	3.28364	11.7985	13.1386	9.20371	1.69481	43.0735	4.07776	13.9857	7.65634
RD5|533772	9051	13	1	0	Low-quality	Genome-fragment	11.35	HMM-based (lower-bound)	Temperate	319.281	179.314	114.807	98.1689	79.5921	174.051	166.966	204.079	168.98	162.366	283.901	126.69	108.189	124.931	14.5996	88.5474	84.8561	122.848	275.405	123.731	48.7965	114.838	209.824	120.692	200.84	154.301	144.549	101.058	138.345	267.781	147.698	103.795	184.917	158.292	249.631	127.062
RF2|2269886	6676	15	2	1	Low-quality	Genome-fragment	7.3	HMM-based (lower-bound)	Virulent	32.1897	96.4036	90.3773	24.7028	29.0519	123.985	68.7389	10.8502	43.3893	50.4165	93.1429	18.0473	25.5327	32.2226	3.86768	10.1736	49.6505	56.8236	90.4098	15.2962	5.41955	85.7432	94.5539	32.3787	48.4225	68.051	127.442	21.3432	116.72	79.6926	57.212	7.9955	99.8889	82.9347	44.2452	29.4516
RF5|692413	6438	16	1	0	Low-quality	Genome-fragment	15.32	HMM-based (lower-bound)	Virulent	29.866	30.4249	7.2892	82.0758	13.8675	40.4367	12.2897	141.445	32.3952	25.0356	19.8854	51.6262	36.6165	7.71087	2.00533	144.003	41.4399	10.1594	20.6985	44.4126	4.45717	19.4984	23.4648	34.7748	98.2419	47.9157	61.0898	107.092	34.9812	17.446	20.1288	251.496	61.9459	36.3508	11.269	157.312
RE4|2017868	5094	9	3	0	Low-quality	Genome-fragment	6.43	HMM-based (lower-bound)	Virulent	157.644	124.97	76.3312	57.4813	44.7222	87.7966	96.2994	84.3035	88.7084	128.425	210.031	58.7225	68.3481	82.8351	8.94499	63.9989	75.6505	77.8948	183.117	54.794	34.0438	71.9573	115.446	79.5643	122.323	124.419	99.2671	68.5756	104.337	164.786	64.2685	70.5558	120.643	117.655	140.387	62.6309
RF5|1619526	24268	52	6	0	Low-quality	Genome-fragment	33.74	HMM-based (lower-bound)	Temperate	20.7398	7.78308	7.18245	124.54	10.0218	0.825181	5.21647	246.889	11.4587	4.10219	5.27535	117.27	40.0512	1.59102	0.719749	121.883	5.77436	1.43741	2.58403	117.4	4.21562	13.0352	0.889274	58.056	61.7775	4.62234	34.3972	133.906	16.3329	6.33332	1.1242	272.447	19.1275	5.17451	1.06769	95.5422
RE12|1060690	9765	14	8	1	Low-quality	Genome-fragment	22.01	AAI-based (medium-confidence)	Virulent	0	3.58195	1.37306	0	1.57633	0	2.43075	0	0.593276	0.485466	0	0	2.9712	0.564858	71.0823	0	1.93179	0	5.6191	0	0.89435	0	2.21003	0.39529	0	0	1.64392	0	0.461258	0.605368	9.08002	0	1.33903	4.09173	0	0
RF3|2144912	16520	19	6	0	Low-quality	Genome-fragment	16.09	AAI-based (high-confidence)	Virulent	106.463	60.5547	41.3926	71.917	95.9727	124.856	66.0937	67.3372	58.2139	93.8358	179.346	55.8308	36.6624	48.7478	8.27465	49.7469	47.1436	58.0682	110.083	44.9184	13.7449	39.5134	196.932	41.1235	80.2584	102.872	30.6094	76.7917	97.3361	170.329	75.9667	51.4823	80.3377	58.7381	127.044	49.6286
RE7|1601379	14993	18	1	0	Low-quality	Genome-fragment	13.33	HMM-based (lower-bound)	Virulent	101.841	35.9273	29.5113	5.16305	162.42	30.2749	62.7985	23.1213	19.7066	19.9197	6.09914	278.489	68.9399	2.94316	7.54719	1.35901	10.9642	13.669	13.5933	15.8923	19.3887	392.174	7.197	45.3119	53.4345	1.49636	31.5855	1.83941	12.3172	19.7139	24.1103	7.59507	42.7338	15.2283	13.4798	50.4767
RE8|2434752	5168	10	2	0	Low-quality	Genome-fragment	3.57	HMM-based (lower-bound)	Virulent	108.333	253.128	284.089	14.3274	79.2282	183.412	274.045	14.0163	104.253	113.744	422.895	18.49	19.6494	92.322	40.8517	10.5138	50.0592	117.278	332.172	13.173	23.417	183.633	243.245	26.1417	58.0192	154.11	260.922	19.5666	127.247	169.29	211.161	8.26284	75.9036	227.523	197.538	17.2281
RF12|112148	14594	14	6	0	Low-quality	Genome-fragment	13.45	AAI-based (medium-confidence)	Virulent	62.7754	107.852	54.6645	11.9921	44.0882	85.9895	45.5403	23.0444	62.7208	50.9983	127.198	17.0808	26.8388	31.559	7.33723	13.729	48.0102	55.2743	63.9166	6.76397	9.14727	71.9089	54.3441	13.2246	79.6144	117.986	230.993	41.8883	100.614	107.34	142.074	10.9726	91.388	135.326	87.3512	57.9575
RE12|1545579	26012	37	5	0	Medium-quality	Genome-fragment	56.4	AAI-based (medium-confidence)	Virulent	9.34854	6.99232	86.3384	0.258775	62.2533	0.513238	0.608341	0.397817	6.2361	0.182246	0.703094	5.74989	7.11068	8.80007	86.1847	0.391659	5.90522	1.6763	0.602695	0.130859	22.111	17.1802	0.829652	9.05199	0.720444	0	9.56559	0	0.346316	0	4.98191	0	0.502678	0.438871	0.199221	0.855711
RF8|2260737	35899	66	3	3	Low-quality	Genome-fragment	35.7	HMM-based (lower-bound)	Temperate	106.491	55.5373	167.324	27.0946	114.485	570.473	147.446	12.6831	30.8234	92.9654	247.849	53.9305	31.318	107.016	7.7849	15.6085	107.121	90.6113	249.141	21.7136	12.546	175.958	386.243	18.1716	116.673	154.362	52.5423	46.3491	97.8651	219.667	125.964	30.9274	54.8173	127.041	303.43	71.3044
RE6|828008	21389	34	3	0	Low-quality	Genome-fragment	13.84	HMM-based (lower-bound)	Temperate	13.7487	12.7555	156.089	17.3089	184.954	0.624168	6.65844	0.4838	32.2319	19.2823	0	61.7686	51.3767	121.978	227.982	0	31.3721	3.87337	0	0.954857	592.049	30.049	0	3.97027	5.91408	0	0.750522	0	2.94818	2.21101	24.5536	0.332744	10.0869	2.13491	0	3.12199
RE12|1773677	7435	15	1	0	Low-quality	Genome-fragment	7.31	HMM-based (lower-bound)	Virulent	0	5.64537	11.7218	0	16.1486	0	0	0.695898	0	0	0	1.11758	3.41453	0.741875	64.7583	0	5.07437	1.75941	0	0	0.671214	1.3507	0	1.03833	1.26027	0	7.55685	0	0	0	0.917349	0	0	6.14172	0	0
RE4|1330326	56278	86	18	0	High-quality	High-quality	100	AAI-based (medium-confidence)	Virulent	40.9987	7.3339	0.357368	174.746	9.95596	21.8243	1.12471	38.3375	4.42648	23.0804	4.87461	54.9244	65.7963	2.7443	0	65.049	6.41654	1.39463	365.622	86.1894	4.34509	1.87366	2.87602	22.5655	45.7033	2.49154	4.27865	32.0157	5.44234	6.93262	1.45431	99.6525	23.0017	8.11395	4.3278	16.6116
RD12|1242299	6731	8	1	0	Low-quality	Genome-fragment	10.79	AAI-based (medium-confidence)	Virulent	69.7345	5.19652	668.307	2.5001	59.0012	23.8009	47.0188	16.1423	223.781	15.4944	1.35856	45.0583	9.69856	73.7522	26.514	2.52261	254.231	309.652	22.1266	12.6427	74.327	30.5855	30.4589	18.9244	49.4189	4.99962	33.3889	0.682866	14.7217	28.1036	72.9573	5.81545	21.3686	0.84801	22.3268	3.3069
RF1|265422	24617	27	6	0	Low-quality	Genome-fragment	23.98	AAI-based (high-confidence)	Virulent	108.432	63.9395	47.1134	92.9695	118.931	143.715	80.6732	85.5433	63.5415	92.0499	170.133	68.1832	32.2644	47.8382	8.57624	67.3201	53.6409	68.7262	131.191	52.6827	16.1166	45.4863	193.086	45.7863	86.7848	103.667	30.9751	113.523	100.817	139.039	85.3358	57.0995	99.8588	66.0831	126.938	65.5546
RE10|485042	10527	11	0	7	Low-quality	Genome-fragment	7.16	AAI-based (medium-confidence)	Virulent	453.943	648.585	735.547	336.02	300.05	738.726	937.995	536.225	598.761	350.803	988.542	429.393	365.876	175.53	23.3737	521.957	423.67	364.091	581.551	92.1548	54.5174	509.899	477.15	207.906	731.663	744.849	1226.8	705.589	711.974	650.835	1045.72	472.916	732.843	846.949	585.801	748.865
RD2|811699	12679	10	0	10	Low-quality	Genome-fragment	12.41	AAI-based (medium-confidence)	Virulent	26.3158	230.629	236.879	30.2612	207.116	71.074	68.6433	10.2019	38.8385	20.564	16.5882	88.1452	16.0183	5.22045	7.24749	10.9814	25.5053	5.84642	1.23648	0.536936	7.97043	6.73248	26.8081	0.608882	8.12927	15.4828	29.1204	10.8756	18.4729	19.1157	26.3589	6.45525	15.4693	30.1627	14.7138	18.726
RF2|836414	15118	29	1	0	Low-quality	Genome-fragment	27.69	AAI-based (medium-confidence)	Virulent	0.374071	1.85092	0	0	1.62909	1.76615	0	0	0	0.313571	0	0.549625	0.239894	0	0	0	4.99113	2.30739	0.518498	0	0.495152	0.664273	3.92562	0.765975	35.9482	184.757	37.1644	48.6453	240.731	21.115	79.4025	0.235384	122.817	533.87	34.9634	12.2694
RD2|1172415	5675	15	1	0	Low-quality	Genome-fragment	6.91	HMM-based (lower-bound)	Virulent	51.8187	3.69809	318.956	17.7919	137.248	45.8734	52.9796	4.55859	82.6891	25.0603	0	26.3553	4.47349	313.455	20.2068	0.598404	1018.11	179.026	11.0501	2.39923	32.9767	15.9264	22.8168	22.4458	23.9412	0	18.3866	0	23.017	8.33328	56.4869	2.50821	14.9765	0	27.3945	6.53708
RE12|875398	25338	32	2	2	Medium-quality	Genome-fragment	51.71	AAI-based (medium-confidence)	Virulent	4.01744	6.35005	32.0145	0.796977	36.3287	3.42478	2.49809	0.204199	4.57285	3.74187	0	1.96761	16.7466	29.7147	140.059	1.34026	52.7526	3.44178	4.33109	0.80604	35.6983	28.3384	0.638791	9.14043	1.47922	0.442714	2.85098	0	0	0.466605	11.5748	0.280885	0	2.478	0.20452	2.34259
RE12|1912800	5425	4	0	2	Low-quality	Genome-fragment	5.13	AAI-based (medium-confidence)	Virulent	0	5.15801	9.88606	0	15.322	0	0	0	0	0	0	9.18994	0	0	61.7343	0	0.993494	0	0	0	0	2.77672	0	0	3.45441	0	0	0	0	0	0	0	0	4.20863	0	0
RE2|282283	17699	38	1	0	Low-quality	Genome-fragment	10.51	HMM-based (lower-bound)	Virulent	0	3.16201	0	0	65.5757	0	1.78814	0	0	0	0	3.28632	12.4996	0.934941	0	0	215.6	0.492728	0.885773	0	1.76227	0	3.04832	0.436183	6.35297	0	0	1.03879	20.6135	2.67198	0	0	0	0	7.61259	0
RE1|2384085	76452	137	9	2	Complete	High-quality	100	DTR (high-confidence)	Temperate	40.9699	42.7669	25.3916	45.5572	13.2254	42.2506	27.2522	86.9359	41.5288	23.0765	9.8791	49.4252	45.6342	17.0006	5.04813	120.94	25.7912	18.2886	13.6491	77.3114	12.2258	35.4197	10.2173	42.5842	65.3819	44.6253	41.7242	109.01	42.4204	28.6258	38.7493	90.683	53.347	40.6991	9.41857	76.9032
RD11|2095319	5215	6	1	1	Low-quality	Genome-fragment	2.2	HMM-based (lower-bound)	Virulent	640.888	591.57	344.519	222.654	221.965	444.158	526.461	391.895	472.132	495.419	789.07	218.287	311.557	307.787	55.9196	239.637	283.179	340.303	736.517	289.805	127.274	281.151	616.597	273.864	452.783	550.657	410.942	341.973	403.346	665.389	419.823	269.534	580.444	459.701	572.369	350.705
RE6|576930	11115	17	9	0	Low-quality	Genome-fragment	30.86	AAI-based (medium-confidence)	Virulent	0	2.51752	1.80944	0	59.2727	0	1.42368	0	1.04244	121.553	3.29085	0.74757	10.4413	59.3021	31.0194	0	108.618	1.56919	0	0	158.941	3.61403	0	0	0	0	0	0.413529	2.43141	0	1.84089	0	1.1764	11.2978	0	0
RE5|1902867	29434	26	3	5	Low-quality	Genome-fragment	24.35	HMM-based (lower-bound)	Temperate	19.5975	15.2108	3.87198	57.5156	4.70667	9.29815	7.52661	186.506	16.5333	9.18029	11.495	59.142	18.7287	6.1841	0.490221	93.6844	5.95112	3.40725	7.72307	329.474	3.17902	8.87085	7.14867	49.4402	32.7893	8.00324	11.9985	89.0104	12.5482	9.43932	4.63443	248.809	13.105	6.20557	13.3805	74.3622
RE12|1038407	8065	11	6	0	Low-quality	Genome-fragment	20.26	AAI-based (high-confidence)	Virulent	0.701204	0	0	0	1.90861	0	0	0	3.59166	0	0	0	0	0	66.3853	0	0.668283	0	1.94387	0	0.773477	0	0.668968	0.957224	0	0	0	0	0	0	1.69138	0	0	0.707744	0	0
RE12|244500	10434	19	6	0	Low-quality	Genome-fragment	14.73	HMM-based (lower-bound)	Virulent	0.541999	0	2.57005	0	6.19611	1.2795	4.54979	0.991758	3.33142	0	1.75282	3.18545	2.08552	1.58592	44.3983	0	2.32448	0.417903	2.25378	0.652465	3.82632	0.481238	0	1.10983	0	0	1.53852	0	0	1.13311	1.96104	0.682103	0	3.28232	0	2.13329
RE8|691156	16141	30	1	2	Low-quality	Genome-fragment	7.13	HMM-based (lower-bound)	Virulent	101.956	65.8772	196.871	26.4813	115.583	540.514	108.821	13.7837	23.6888	89.8714	232.279	51.7365	32.5801	89.1912	6.11646	14.0963	102.011	71.0479	242.818	24.2519	8.03868	171.097	421.497	18.1749	96.3655	146.291	51.7162	43.2841	111.063	207.29	122.964	29.7628	48.6054	114.576	296.654	88.0274
RD1|2438449	5446	5	1	2	Low-quality	Genome-fragment	0.45	HMM-based (lower-bound)	Virulent	285.564	150.29	73.8596	167.478	48.6151	153.213	98.792	243.214	184.034	203.69	248.509	203.688	137.85	120.02	7.25125	206.401	101.44	140.116	200.068	195.634	23.3671	125.393	194.173	155.931	203.024	154.483	163.595	183.99	124.886	209.494	90.1718	148.326	218.488	114.243	159.86	189.372
RF1|863040	8153	10	1	0	Low-quality	Genome-fragment	4.87	HMM-based (lower-bound)	Virulent	49.2481	31.7473	14.8009	81.3234	35.4945	36.0245	27.1726	118.038	35.5289	37.7943	30.2833	88.6672	74.2871	28.0765	0.652031	94.9681	58.1741	21.3928	31.7276	78.0732	11.0179	29.5621	36.3961	59.1808	143.086	73.6092	63.9911	214.794	141.981	59.455	30.9528	104.316	118.68	74.9113	44.4927	208.4
RE12|1382122	8064	5	0	5	Low-quality	Genome-fragment	2.67	AAI-based (medium-confidence)	Virulent	0	8.67504	4.98808	0	8.01714	0	5.88697	0	10.0579	0	2.26797	0	1.79897	0	35.3157	0	5.68111	1.08145	1.94411	0	9.90174	1.24535	0	2.87203	1.16197	0	0	0	0	0	14.3785	0	0	0.707832	3.21312	0.920087
RD12|1504448	9885	15	5	0	Low-quality	Genome-fragment	17.95	AAI-based (medium-confidence)	Virulent	19.4514	220.093	290.269	10.2144	65.7138	15.5315	23.212	13.6089	7.61896	2.87743	0.925083	119.784	1.10067	1.953	1.4597	1.71773	2.99882	1.76445	0.792984	0.344351	0.883493	19.8107	6.54959	0.780982	5.21351	3.4044	15.4277	2.32492	11.3915	1.79406	15.1796	1.79996	5.9525	9.23898	5.76666	4.12824
RE12|785025	6340	9	1	0	Low-quality	Genome-fragment	4.02	HMM-based (lower-bound)	Virulent	0	0	0	0	4.37022	0	0	0	0	0	1.44234	0	0	0.870007	60.8502	0	7.22594	0	0	0	8.65855	0	0	0	0	0	0	0	0	0	0	0	0	0	0	0
RD1|1035772	28226	35	7	1	Low-quality	Genome-fragment	40.51	HMM-based (lower-bound)	Virulent	17.8316	251.558	49.1648	90.9791	78.7478	7.0947	19.3415	30.0622	56.6486	8.56548	5.50753	148.81	8.09479	15.4379	82.9491	0.842188	85.9267	4.94341	7.22047	0.24119	106.038	17.9673	50.0797	4.51287	43.6536	25.0373	123.414	37.1279	267.13	57.8032	100.038	5.92542	97.9771	100.303	192.039	48.2354
RE1|406891	6093	10	0	9	Low-quality	Genome-fragment	4.1	AAI-based (high-confidence)	Virulent	170.779	252.588	145.237	191.122	75.2845	115.032	215.56	211.444	187.311	137.712	196.606	190.923	118.45	71.9694	30.1628	212.351	88.8996	108.062	205.84	162.011	48.9383	158.227	162.043	95.6607	149.171	108.622	206.82	132.015	120.496	127.096	116.417	161.194	133.053	137.71	115.669	115.075
RD6|1734730	6285	8	2	0	Low-quality	Genome-fragment	10.68	HMM-based (lower-bound)	Temperate	565.971	488.631	282.666	213.13	164.093	343.051	372.629	343.287	393.597	432.95	747.851	221.447	247.552	278.205	41.3246	236.662	207.527	288.612	604.892	222.053	95.6805	264.444	496.172	222.941	395.825	490.821	295.006	182.831	341.128	567.158	276.726	220.816	488.907	437.746	517.8	273.291
RF2|1623917	6108	13	2	1	Low-quality	Genome-fragment	13.28	AAI-based (medium-confidence)	Virulent	24.0726	12.5984	5.48787	241.347	1.51207	64.4785	248.71	84.7086	60.703	56.6571	65.8735	48.9739	16.6255	1.8061	1.492	150.671	10.5888	18.5609	10.2667	2.78643	4.28945	4.93246	40.632	4.42371	176.418	210.282	9.19862	124.918	288.332	168.4	92.6819	99.0422	98.4742	106.534	63.6312	142.731
RF5|1837856	7097	19	3	1	Low-quality	Genome-fragment	12.49	AAI-based (medium-confidence)	Virulent	5.57792	15.7713	15.114	27.0313	7.80815	18.8112	42.3642	99.8786	11.4283	6.67968	30.9239	14.0497	4.5992	5.05185	1.92613	128.718	17.8467	3.072	26.508	35.972	8.96556	6.36764	34.9698	12.5095	79.2174	26.0798	108.573	277.842	133.279	199.074	137.429	1042.94	46.0605	67.5593	59.8752	535.795
RF9|841942	7077	11	1	0	Low-quality	Genome-fragment	10.59	HMM-based (lower-bound)	Virulent	15.1829	3.95396	4.73646	84.6521	6.09017	1.88644	4.472	133.791	11.4606	3.34928	11.6292	104.497	13.8366	1.16911	0.321929	159.792	6.09264	1.23227	0	118.802	0.352584	6.38564	3.8118	44.7252	27.8044	3.96266	24.9515	134.442	3.81872	6.68241	11.5651	123.696	7.39051	4.8393	0	123.188
RE12|350148	10957	18	1	1	Low-quality	Genome-fragment	6.43	HMM-based (lower-bound)	Temperate	475.87	508.21	436.245	384.266	234.047	612.87	454.203	599.234	549.355	319.297	657.646	359.079	285.981	186.009	61.7552	293.507	205.367	290.905	437.825	290.468	124.682	251.131	381.61	340.661	517.378	518.541	503.256	455.568	460.818	482.862	429.51	318.926	636.061	523.025	400.117	415.773
RE7|1384805	24836	23	8	2	Low-quality	Genome-fragment	25.47	HMM-based (lower-bound)	Virulent	185.35	167.875	161.418	132.262	72.3905	167.981	57.3432	158.328	222.067	67.3789	24.6689	94.3471	165.887	29.2049	3.66933	97.3551	129.556	108.325	18.3058	40.4313	18.2853	137.277	13.2513	61.2354	248.627	124.659	250.14	174.15	146.355	93.5412	68.6553	86.2552	231.125	165.934	18.1529	148.923
RE12|1136588	5389	10	1	0	Low-quality	Genome-fragment	6.59	HMM-based (lower-bound)	Virulent	103.891	2.59623	34.8324	1.24907	1.71381	52.0239	0	2.88031	32.2509	25.5106	0	1.54189	0	13.306	107.805	0	26.5035	437.739	4.36369	4.42148	75.0099	93.1757	9.0104	7.87902	2.60812	1.04078	113.196	0	30.925	10.9694	74.6723	0.660332	3.63954	4.23675	1.92322	0
RF5|35636	5668	15	1	0	Low-quality	Genome-fragment	3.07	HMM-based (lower-bound)	Virulent	15.9639	7.40531	4.73111	27.3146	7.06097	7.06616	1.39592	53.8578	14.3096	11.7092	0	36.6498	8.95803	2.43289	0.267971	71.298	19.9689	13.8474	2.76593	24.0219	2.42128	5.31536	5.71125	18.3875	53.7276	10.885	19.8254	72.1731	11.92	3.12884	4.81333	126.193	33.4504	20.141	1.82856	64.1425
RE3|2046179	7581	17	3	0	Low-quality	Genome-fragment	8.02	HMM-based (lower-bound)	Virulent	32.0768	19.3783	0	24.8616	68.6295	42.2646	27.1355	7.50746	74.8908	5.00258	18.0935	12.6047	40.1853	4.36553	1.60281	8.95909	15.2854	128.839	34.1215	81.7189	20.4069	13.9093	2.13503	99.797	4.94399	14.7968	8.47008	3.03151	2.9707	4.67861	3.59873	6.57161	12.9359	0	2.0507	3.42548
RE11|2087450	6776	11	5	0	Low-quality	Genome-fragment	13.37	HMM-based (lower-bound)	Virulent	0.834595	0	17.8087	0	69.0591	0	2.33532	0	6.83983	60.1666	0	0	9.09892	135.942	65.7888	0	19.0899	0	0	0	39.2182	2.96413	0	3.41795	0	0	0	0	0	0	9.05909	0	0	1.68476	0	1.09498
RE12|643998	8216	13	5	0	Low-quality	Genome-fragment	23.35	AAI-based (high-confidence)	Virulent	0	0	17.1353	0	61.8264	0	0	0	0.705129	2.30797	0	4.55107	0.441422	1.67838	40.5781	0	13.776	0	0	0	17.1593	0	0	1.40945	1.14047	0	0	2.23777	0	2.87801	9.13162	0	0.795743	0	0	0.451532
RE3|538006	11056	26	3	0	Low-quality	Genome-fragment	11.61	HMM-based (lower-bound)	Virulent	13.8107	2.53095	77.6149	13.6988	4.73371	69.4324	5.00946	0.467981	106.896	2.57267	0.827103	2.25468	1.96819	2.74395	5.56384	2.45727	5.3624	1163.85	3.54498	5.8497	56.9869	18.1666	13.1758	15.7109	5.93259	2.53652	10.8897	0.831471	24.8512	0	3.70142	0.965592	3.54803	0.516277	5.62459	0
RE8|1184063	5377	12	7	0	Low-quality	Genome-fragment	6.04	AAI-based (high-confidence)	Virulent	2.10348	5.20406	2.49358	1.25186	6.87055	0	0	0	0	0	0	1.54533	2.69795	111.302	1.5536	23.368	6.51535	15.4078	24.7828	12.661	150.355	102.722	385.302	10.7681	0	0	0	0	0	0	0	0	0	0	0	0
RD7|1977793	9013	11	2	2	Low-quality	Genome-fragment	8.53	HMM-based (lower-bound)	Virulent	53.9608	45.7936	63.2241	46.304	2.73257	45.9181	52.6711	19.518	25.0683	562.263	28.4084	16.1335	16.4979	18.6656	12.5546	29.7658	23.0227	62.8926	56.5308	18.8833	23.809	39.5549	31.1275	11.9916	33.7876	52.8951	46.3082	31.6182	6.49665	32.138	84.7548	51.3268	24.6628	41.798	29.898	45.6881
RE6|802404	16896	39	10	0	Low-quality	Genome-fragment	31.8	AAI-based (high-confidence)	Virulent	1.00412	7.03861	9.12593	0.398394	111.329	0	0.936563	0	5.14323	149.546	0	9.58985	17.6013	185.265	42.2954	0	50.4009	0.516145	3.24755	0.201462	84.105	22.2889	0	5.25451	2.2183	2.3237	0	0	7.7309	34.6372	15.7433	0	11.6084	4.05395	2.14695	9.22178
RE1|1018597	83780	111	13	1	Medium-quality	Genome-fragment	81.61	AAI-based (high-confidence)	Virulent	153.902	89.2605	61.3745	133.613	163.299	188.192	118.143	124.626	89.756	139.309	234.996	104.783	54.5437	76.3383	11.5755	102.146	83.8241	96.1806	168.319	80.8926	22.9033	65.5674	286.827	75.5138	132.7	149.424	55.9495	151.42	140.265	208.078	127.487	74.5855	132.192	97.6307	191.747	87.0105
RE3|842317	31168	42	31	0	Low-quality	Genome-fragment	33.62	AAI-based (medium-confidence)	Virulent	0.181443	0.897786	0	0	5.33378	1.285	0.507705	0	0.557624	0	0	0	14.0796	0.530914	0.146194	21.9002	1.90217	302.044	27.9161	6.44349	62.7252	47.3641	2.25032	22.5398	0	0	0	0	0	0.379326	0	0	0	0.36627	0	0
RD12|2184701	8889	12	7	0	Low-quality	Genome-fragment	20.15	AAI-based (medium-confidence)	Virulent	112.608	11.0179	929.915	7.95121	93.5107	39.0492	97.9108	22.1186	380.618	24.5322	7.20116	67.304	10.2	44.988	42.2048	4.58447	72.1537	541.554	9.70021	40.974	136.004	57.0531	47.3425	48.2012	71.1533	1.26195	33.4097	1.03417	30.4028	74.483	191.057	5.60461	15.4454	13.4849	38.4768	5.4255
RF10|1438266	21117	21	1	1	Low-quality	Genome-fragment	18.79	HMM-based (lower-bound)	Virulent	159.611	150.73	129.21	113.319	68.374	147.304	52.455	152.4	212.343	47.3676	12.125	87.1571	162.814	29.516	2.62529	86.8404	103.368	92.5064	10.0224	29.3371	15.4202	120.793	10.9862	52.2783	256.916	107.038	225.016	168.47	109.208	85.3807	63.9512	78.1909	225.389	175.155	17.6688	135.975
RF6|1184345	8294	19	1	0	Low-quality	Genome-fragment	4.5	HMM-based (lower-bound)	Virulent	70.9118	58.1979	58.1971	71.0135	61.9873	126.357	56.2832	118.527	90.1062	61.7292	17.6406	72.6332	62.0924	15.961	2.74691	79.8419	98.7744	64.1389	23.6275	71.8211	14.7416	60.5406	59.8458	72.602	216.911	150.802	111.29	129.678	124.905	103.347	119.239	153.17	172.629	110.801	37.4883	234.378
RE1|1745460	8513	19	1	1	Low-quality	Genome-fragment	13.5	AAI-based (medium-confidence)	Temperate	37.8653	60.8094	50.4	69.9773	41.9494	77.6273	49.2588	49.2299	93.2324	17.8196	3.22252	65.8843	11.9286	5.18345	2.05179	130.843	72.4916	47.635	4.60393	23.1912	8.20705	50.1357	3.16882	38.9945	47.8796	57.3195	32.9996	81.5285	94.1788	18.7488	30.445	52.2514	85.246	74.4254	7.30477	94.5641
RE7|1237174	15902	15	0	12	Low-quality	Genome-fragment	22.57	AAI-based (medium-confidence)	Virulent	381.946	616.323	471.328	187.097	201.728	821.908	704.037	278.19	458.673	347.3	557.223	221.552	227.611	183.665	15.1867	389.737	218.781	451.889	464.345	63.7885	48.1724	486.589	370.494	107.533	460.786	807.699	759.136	378.358	499.929	610.399	793.479	256.227	535.706	710.354	364.984	371.166
RE6|758100	6881	8	0	0	Low-quality	Genome-fragment	8.83	AAI-based (medium-confidence)	Temperate	3.28744	11.1831	8.76847	0	71.5845	0	0	0	0	41.3362	0	4.22647	0	53.7075	70.9654	0	59.9204	0	0	0	135.079	1.45945	0	0	2.0426	0	0	0	2.61833	0	16.8505	0	0	0	1.50621	0
RE5|1744379	11185	15	2	0	Low-quality	Genome-fragment	12.01	HMM-based (lower-bound)	Virulent	17.6962	16.2614	7.19247	48.1449	11.0097	20.8879	12.0255	18.5034	11.913	22.4631	1.63513	15.9722	50.2586	17.9998	0	25.8073	4.09588	15.5937	14.7172	489.664	4.46176	23.7931	1.92945	38.6518	5.44529	10.029	2.87044	8.21881	11.2756	14.7984	5.4881	6.99934	27.4723	2.04129	27.3353	1.99005
RD9|136365	6452	9	1	1	Low-quality	Genome-fragment	1.19	HMM-based (lower-bound)	Virulent	188.449	139.868	85.2025	70.9433	261.002	130.358	264.881	56.1345	246.926	115.355	181.415	271.093	623.94	51.2942	12.359	55.792	39.2616	325.746	374.195	238.463	281.159	343.206	97.0004	629.973	127.074	50.4196	49.761	11.3983	47.4712	186.908	87.7404	33.0923	82.0775	56.6195	146.982	36.2239
RE12|593666	19886	19	0	11	Low-quality	Genome-fragment	9.09	AAI-based (medium-confidence)	Virulent	21.8974	101.313	133.837	1.69246	60.5313	21.1473	2.7851	3.1222	29.1328	21.9316	5.05828	82.1063	16.0491	29.2629	75.1181	0.683082	24.5282	3.06977	16.5555	1.02703	10.9165	45.7027	2.71308	9.70533	22.146	3.66658	56.1037	1.38682	19.932	10.4043	31.8971	0.357893	15.452	83.2399	13.0296	5.96969
RE12|523627	5577	13	3	0	Low-quality	Genome-fragment	7.7	AAI-based (high-confidence)	Virulent	0	0	2.40415	0	0	0	0	0	0	0	0	0	0	8.40679	66.588	0	1.93283	0	0	0	1.11854	4.50174	0	0	0	0	0	0	0	0	0	0	0	0	0	0
RE1|1103886	8542	14	1	0	Low-quality	Genome-fragment	4.28	HMM-based (lower-bound)	Virulent	33.1024	0	0	47.6752	4.32486	6.25162	3.70503	44.8228	11.5297	16.0942	5.35264	125.971	14.4356	0.968598	0.177811	164.192	4.41675	0	9.1766	148.637	1.31451	9.9931	1.26322	34.7952	48.814	1.31322	10.3361	33.8997	21.6192	6.92042	0	119.562	84.1912	4.00934	3.03332	31.7039
RD1|1619389	32838	59	5	0	Low-quality	Genome-fragment	28.13	HMM-based (lower-bound)	Virulent	198.909	221.767	198.641	126.475	85.7818	195.551	77.5836	215.229	289.332	74.3466	23.9485	125.253	179.47	37.2056	4.0934	122.857	147.061	120.038	19.3352	50.5849	22.074	162.39	15.7726	74.4072	289.766	147.23	304.799	220.454	173.375	106.39	72.0723	104.79	256.432	214.844	25.0916	169.12
RE1|1153114	6873	2	0	2	Low-quality	Genome-fragment	2.36	AAI-based (high-confidence)	Virulent	314.316	317.563	280.918	165.025	88.6889	290.394	300.459	271.008	279.004	233.132	413.782	215.196	132.447	130.011	23.8668	226.297	93.318	192.865	330.745	230.79	38.8463	226.478	288.091	130.296	162.917	238.288	260.425	137.764	201.846	238.246	206.411	188.463	232.101	215.097	208.853	172.184
RF11|2283491	5219	7	0	0	Low-quality	Genome-fragment	10.53	AAI-based (medium-confidence)	Temperate	374.919	209.102	151.575	181.856	64.8867	225.106	234.982	267.672	124.325	507.756	222.522	331.955	284.217	256.821	50.4928	394.317	174.528	309.965	626.311	448.071	104.944	348.283	419.709	238.153	498.218	559.907	384.482	384.866	296.021	484.784	368.534	379.786	422.159	400.29	420.011	457.06
RE3|1258062	17899	16	2	10	Low-quality	Genome-fragment	1.93	HMM-based (lower-bound)	Virulent	338.7	581.953	396.643	239.744	282.42	699.253	657.314	428.397	444.397	455.544	678.975	358.617	404.838	143.605	27.2392	370.729	522.589	442.641	488.739	127.416	60.9206	416.87	577.834	260.295	802.785	997.096	944.394	586.776	731.781	828.636	936.25	464.822	869.689	959.884	548.352	742
RE12|682738	6302	5	0	1	Low-quality	Genome-fragment	15.67	AAI-based (medium-confidence)	Virulent	0	2.22011	17.0206	0	13.6782	0	0	0	0	3.76117	0	1.97776	0	0.437626	233.661	0	3.42095	0	0	0	39.0005	0	0	0.612505	0	0	0	0	0	0	17.3164	0	0	0	0	0
RF5|505456	7391	22	3	0	Low-quality	Genome-fragment	10.06	HMM-based (lower-bound)	Virulent	0	0.946496	0	0.910738	1.24959	0	0	1.40008	0	5.77258	0	0.562119	0.981389	0	0	0.91894	13.126	0.58996	2.12113	0	0.337605	0	0	2.08903	100.154	97.8931	69.5025	140.547	74.9579	85.5801	40.6037	136.255	138.877	131.288	23.8388	155.599
RE1|376482	17261	21	6	5	Low-quality	Genome-fragment	18.27	HMM-based (lower-bound)	Virulent	35.384	28.3697	22.915	80.7237	20.1541	44.8595	10.5427	86.9278	32.2206	16.4784	2.1191	118.903	46.6446	5.43244	2.28784	170.968	72.5975	18.4409	2.72475	60.1467	6.28833	35.4899	11.8776	62.3916	72.7416	31.194	79.5159	137.67	38.8809	14.0414	20.9424	109.265	72.7225	56.8779	6.00443	181.61
RE6|2097791	12337	19	15	0	Low-quality	Genome-fragment	13.29	AAI-based (medium-confidence)	Virulent	0	1.13408	0	0	4.74127	0	1.28266	0	0	0	0	0.673522	0.881914	38.0033	2.1545	7.15689	6.77153	9.18945	23.509	7.17367	70.3852	38.2586	211.226	6.88337	0	0	0	0	0.73019	0	0	0	0	0	0	0
RE9|340093	5967	8	1	0	Low-quality	Genome-fragment	0.28	HMM-based (lower-bound)	Virulent	74.8721	45.7226	5.61755	33.8425	105.767	39.1538	14.5857	23.4118	72.8172	25.4229	6.13001	29.9394	80.837	18.95	1.27272	6.82945	3.61301	180.496	23.646	182.546	11.2907	12.6225	1.80836	432.124	6.28128	12.2195	5.38056	1.5406	0	1.98137	3.42911	2.98184	2.19133	0	0	1.24344
RE6|999136	23360	17	1	1	Low-quality	Genome-fragment	30.47	HMM-based (lower-bound)	Virulent	6.05224	20.0643	31.2814	0	223.513	2.28602	7.11274	1.10745	14.3841	14.8143	0	53.7112	16.6121	18.8899	28.6737	0.581497	94.0199	1.49329	2.68447	0.582861	625.785	20.4203	0.92384	23.9598	1.80503	0.720301	3.77958	0	5.78448	0.253057	19.2702	0	3.91822	6.35304	0.443675	1.27048
RE3|177337	24176	51	3	0	Low-quality	Genome-fragment	23.55	AAI-based (medium-confidence)	Virulent	89.8247	43.9826	33.5532	70.4422	86.2094	101.884	67.0904	69.1265	48.8849	90.1995	127.468	50.5236	27.3024	42.4366	5.71708	51.2707	40.1285	57.1743	84.949	43.5063	11.6629	31.9851	163.356	37.3611	72.4772	82.5907	23.2401	81.562	76.0136	125.926	71.0938	38.7117	78.9645	47.4561	102.031	50.6383
RE12|1817512	50256	75	11	4	High-quality	High-quality	97.15	AAI-based (high-confidence)	Temperate	0	0	0.266793	0	0	0	0	0	0	0	0	0	0.28866	0	274.631	0	0	0	0	0	0.0496505	0	0.21471	0	0	0	0.638845	0	0	0	0	0	0	0	0	0
RE1|430932	36083	75	3	0	Low-quality	Genome-fragment	44.85	AAI-based (medium-confidence)	Virulent	211.112	213.455	195.455	139.166	79.603	207.379	80.2545	207.344	279.367	72.653	21.5414	107.426	186.447	37.6813	4.1883	117.079	153.253	127.248	17.8136	42.6396	21.299	161.702	18.3913	75.7388	316.163	145.026	301.857	224.195	166.895	111.24	82.2247	104.341	279.574	208.494	27.5744	164.295
RD9|2176606	24461	27	3	2	Low-quality	Genome-fragment	49.47	HMM-based (lower-bound)	Virulent	12.2532	1.42994	0	57.651	5.16013	0	0.323457	11.2106	0.47368	0	0.747676	246.957	1.03786	0	0.0310465	164.098	0.440677	1.42607	2.88409	14.194	0	0	0	94.3659	3.0645	0	0.656265	40.2119	2.57792	0	0	62.8463	0	0.933397	0	129.671
RE3|539247	11084	28	4	0	Low-quality	Genome-fragment	11.31	HMM-based (lower-bound)	Virulent	191.84	11.3605	8.46768	0.303648	9.72125	38.543	3.56915	0.933598	86.2415	38.4926	4.12507	0.74966	1.63602	20.6521	182.184	2.45106	27.9599	553.507	9.90086	9.52013	112.223	99.2107	32.126	10.7958	3.80417	0	185.382	0	53.2342	15.4666	106.455	2.24736	13.5664	22.6588	6.07792	7.02865
RE12|1398828	12474	13	2	0	Low-quality	Genome-fragment	25.12	AAI-based (high-confidence)	Virulent	0	2.24324	7.52411	0	8.39119	0	0	0	0.928866	0	0	0	0.290743	0.442187	70.1958	0	4.75282	0.699117	0	0	0.600105	0	0	0.309444	2.25351	0	0	0	3.61085	0	1.09355	0	0	4.57588	0.830868	0
RE6|368322	10374	23	2	0	Low-quality	Genome-fragment	11.23	HMM-based (lower-bound)	Virulent	2.18053	60.0158	131.185	0	351.066	0	5.33879	0	2.23379	11.8811	0	0.400484	4.54477	14.3559	138.504	0	74.0344	3.36256	0	0	113.289	7.26032	0	0.744169	0.451614	0	0.773709	0	2.1709	0	5.25968	0	1.26043	4.40174	0	0
RD6|1825189	17345	18	4	1	Low-quality	Genome-fragment	30.26	AAI-based (medium-confidence)	Virulent	159.435	162.537	145.327	114.29	64.9617	142.008	42.4228	147.36	222.114	54.1155	15.2891	96.5299	150.547	25.2816	3.54649	86.7341	108.447	94.0206	9.49044	31.792	17.1192	116.086	10.2648	54.9681	222.03	115.764	214.255	168.538	138.41	79.4097	64.0957	80.2182	198.264	162.896	17.0298	129.613
RE12|1656258	5095	14	2	0	Low-quality	Genome-fragment	3.19	HMM-based (lower-bound)	Virulent	0	0	0	0	16.9186	0	0	0	0	0	0	0	4.27092	1.0826	72.1421	0	42.8426	0	0	0	27.9153	0	0	0	0	0	0	0	0	0	14.7253	0	0	1.12031	0	1.45625
RE12|839934	15106	23	3	0	Low-quality	Genome-fragment	24.28	HMM-based (lower-bound)	Virulent	17.9697	26.3966	1.33139	13.8137	37.9065	15.4661	9.42787	3.42513	47.9391	28.5577	0.605352	7.9759	96.2741	4.56428	92.6538	3.14731	9.63339	47.9164	30.0968	44.391	256.527	151.575	8.92895	92.2456	1.24058	1.11388	1.59403	3.34702	1.78903	0.782659	0.451509	0.471141	0.865594	0.755721	0.686102	0
RE11|2004408	5194	7	2	0	Low-quality	Genome-fragment	3.22	HMM-based (lower-bound)	Virulent	0	2.6937	0	0	10.6689	0	0	0	0	1.8254	0	0	4.88777	252.747	67.8428	0	26.9796	0	1.50917	0	9.12775	1.93348	0	0	0	0	1.54533	0	0.867189	0	11.8183	0	0	4.39581	0	0
RE12|1294683	5087	14	3	0	Low-quality	Genome-fragment	4.35	HMM-based (lower-bound)	Virulent	1.1117	0	1.31787	1.32323	0	0	0	0	3.41656	0	0	0.816713	7.12939	0.542151	58.6703	0	0	5.14299	4.62275	1.33828	15.4511	7.89658	0	0.758798	0	0	0	0	0	0	0	0.699534	0	0	0	0
RE12|2013935	5851	5	1	0	Low-quality	Genome-fragment	7.63	AAI-based (medium-confidence)	Virulent	0	0	2.29157	0	0	0	0	0	0	0	0	0	0	9.89854	81.7707	0	0.921159	0	0	0	1.91908	0	0	0	0	0	0	0	0	0	0	0	0	0	0	0.634044
RE9|2168230	5014	5	2	0	Low-quality	Genome-fragment	10.26	AAI-based (medium-confidence)	Virulent	62.0337	20.9281	0	11.4112	53.4177	33.2826	25.248	0	45.0619	2.8364	10.9427	4.14302	107.051	1.10009	0.908771	4.74105	2.68733	102.618	37.5205	62.457	19.9062	38.0549	2.15207	98.5402	7.47515	3.35585	0	0	0	1.17898	0	0	1.30391	0	0	0.739886
RD12|821765	10054	17	2	1	Low-quality	Genome-fragment	10.59	AAI-based (medium-confidence)	Virulent	39.3739	4.17479	562.111	4.01707	44.7059	18.5901	62.1697	5.14621	256.995	13.6738	0.909533	33.4717	6.13231	57.0566	16.8443	2.02662	181.462	216.849	7.01689	12.1883	61.1772	29.9656	18.7819	30.7142	38.2111	1.11572	24.7484	0	10.752	28.2224	56.306	3.18547	11.7049	0.56773	18.5555	0.737973
RE12|974161	5698	5	3	0	Low-quality	Genome-fragment	10.77	HMM-based (lower-bound)	Virulent	0	1.22772	8.23585	0	3.24175	0	0	0	0	11.6476	0	2.91655	0	3.38811	64.3742	0	14.1884	0	0	0	3.28436	0	0	0	0	0	0	0	0	0	0	0	0	0	0	0
RE2|311648	43619	72	9	0	Low-quality	Genome-fragment	42.49	AAI-based (high-confidence)	Virulent	93.7371	55.0098	33.9664	77.2369	98.1047	117.989	73.6446	80.4231	48.7438	81.2937	138.155	58.768	32.9256	42.2992	6.58118	55.6661	54.5531	56.8804	93.4478	46.7443	12.7282	37.1824	164.013	45.2203	86.3564	95.6672	30.7301	88.8315	86.8432	125.089	71.1461	46.8281	81.0877	59.6719	109.775	55.1974
RD2|1037218	20447	25	11	0	Low-quality	Genome-fragment	34.34	HMM-based (lower-bound)	Virulent	0	28.739	118.362	0	168.18	0	0.773911	0	0	6.02802	0	0	0.177372	8.09289	89.325	0.166085	37.9575	0.853014	0.766729	0	29.0442	10.3141	0.527728	0	0	0	0	0	1.32171	0.867329	0	0	0.959235	0	0.253442	0
RF5|1293237	7763	13	2	1	Low-quality	Genome-fragment	8.99	AAI-based (medium-confidence)	Virulent	145.697	135.171	143.355	100.15	50.7611	133.28	68.2867	142.63	207.465	41.525	18.8472	81.8829	138.285	28.0659	2.83698	68.2426	104.142	87.6236	20.1949	35.0783	13.0178	125.482	15.2898	58.176	170.793	108.375	230.568	149.798	130.548	68.5338	58.8655	83.4281	210.544	147.791	16.021	118.037
RE11|297250	27956	30	24	0	Medium-quality	Genome-fragment	61.82	AAI-based (high-confidence)	Virulent	176.599	208.946	235.968	82.7082	85.2347	250.474	110.377	43.8632	161.847	316.083	204.438	82.1829	60.3243	211.905	72.0149	32.4337	63.6215	190.444	390.306	11.8107	77.8311	176.2	284.081	82.7065	169.765	174.145	320.128	69.0541	187.379	357.358	214.696	16.9296	261.223	183.555	341.261	48.4359
RE5|750457	21329	20	1	8	Low-quality	Genome-fragment	19.7	HMM-based (lower-bound)	Temperate	9.01483	5.24773	1.88588	49.2324	1.1547	2.5037	0.741908	152.341	7.33369	2.22259	4.71606	45.9698	9.18201	1.03443	0.071211	76.1058	0.758081	1.22661	0	275.134	1.28687	0	1.26476	33.2993	12.0811	2.62963	6.7737	69.3906	1.90059	2.21723	1.91865	185.025	7.35655	0.53523	0.971846	47.6573
RD1|2209902	16767	23	7	1	Low-quality	Genome-fragment	37.28	AAI-based (medium-confidence)	Virulent	172.689	45.8944	30.3872	394.835	21.4823	33.0434	23.1223	37.3385	73.9413	6.22011	0	190.795	58.4013	3.61867	30.1652	63.5967	11.8935	9.62215	3.27253	19.8952	14.9562	15.872	47.9447	8.51793	142.784	41.8139	54.5724	32.8958	45.1304	30.673	32.9492	42.8713	61.2178	48.6812	21.6347	66.3766
RE12|791941	5546	6	5	0	Low-quality	Genome-fragment	9.47	HMM-based (lower-bound)	Virulent	1.01969	36.5797	31.4287	0.606858	180.407	0	11.413	0	4.17839	0	0	0	1.30787	19.394	148.298	9.18484	67.5413	11.7934	14.1339	0	395.702	40.7421	61.2873	0	9.29238	27.3055	69.4681	9.94526	35.7346	5.32945	63.9498	0	18.8614	9.26282	12.1471	0
RE3|314894	31919	66	3	0	Low-quality	Genome-fragment	18.14	HMM-based (lower-bound)	Virulent	219.518	215.002	209.191	142.875	80.0533	212.474	79.5695	209.917	294.395	77.0813	18.6218	131.072	189.977	40.4369	3.90195	115.01	152.139	137.018	20.3831	43.51	21.2633	161.245	17.41	75.8239	330.84	152.348	322.627	232.562	179.919	117.788	90.1735	109.257	269.755	219.062	34.4187	166.202
RE12|1251967	21076	30	9	0	Medium-quality	Genome-fragment	53.94	AAI-based (high-confidence)	Virulent	0	0	0.636173	0	0	0	0	0	0	0	0	0	0	0	82.9477	0	0	0	0	0	0.355177	0	0	0	0	0	0	0	0	0	0	0	0	0	0	0
RE10|932490	12845	6	1	2	Low-quality	Genome-fragment	1.96	HMM-based (lower-bound)	Virulent	27.2965	10.3476	0	11.7908	14.62	8.8344	16.0151	0.805606	31.1203	5.16684	22.781	4.85164	193.124	8.3736	3.36999	3.96568	4.19595	34.9646	36.0047	138.859	12.2382	13.2909	2.94018	183.008	6.20053	3.49318	0	0.715667	0	4.60212	5.30984	0	1.01796	0	8.06871	0
RF9|2199257	5410	9	1	0	Low-quality	Genome-fragment	7.09	HMM-based (lower-bound)	Virulent	26.1331	27.1546	2.47837	57.8565	25.0384	41.9511	17.5499	76.5102	20.3463	32.4217	23.664	69.1157	54.3003	19.3717	1.54413	94.7851	46.8237	14.5078	27.5295	72.3566	7.84086	13.9221	21.9399	47.0906	95.2597	26.9552	83.0834	151.23	81.5914	37.1513	25.2144	74.3279	108.762	80.1857	32.5679	170.746
RE10|1252955	15780	23	2	1	Low-quality	Genome-fragment	25.95	HMM-based (lower-bound)	Virulent	6.80919	7.5364	0	8.3181	46.0421	11.8444	7.01959	2.62307	4.40558	3.605	3.47698	7.63523	204.089	0.873866	1.25128	12.6971	4.78174	162.755	55.1388	73.9886	5.45537	16.8647	0.683806	112.522	2.37518	2.84347	0	1.45639	1.14174	1.49846	0.864448	0.451018	0.828622	0	0.656797	1.41057
RF9|192275	9317	12	6	0	Low-quality	Genome-fragment	9.78	AAI-based (medium-confidence)	Virulent	4.24885	9.01005	2.87817	70.0797	2.64341	5.01515	9.3413	53.3116	4.35262	4.57928	4.9074	50.8347	7.39592	1.77606	0.815101	90.0288	2.60316	1.40401	10.0959	21.1899	4.15114	2.15573	9.26518	4.97156	25.6453	16.8557	57.7195	133.693	25.1387	20.9377	22.6935	215.414	14.0342	15.316	17.7984	142.945
RE12|1019810	5825	11	1	0	Low-quality	Genome-fragment	3.46	HMM-based (lower-bound)	Temperate	0	34.8276	19.5653	1.15558	26.4256	0	0	0	5.96739	4.88299	1.56986	2.85296	0.622613	22.7262	33.115	0	2.77581	0	2.69138	0.584362	13.0652	0.862015	0	3.31331	0	0	0	0	0	0	2.3418	0	0	5.87944	0	0
RE6|689561	37399	45	8	1	Low-quality	Genome-fragment	46.81	AAI-based (medium-confidence)	Virulent	6.50216	19.6404	27.2469	0.539955	151.134	1.60637	3.5965	0	12.5474	13.8165	1.46706	42.5471	13.0915	17.8458	30.0125	0.544818	79.4066	2.09864	1.88636	0	672.498	24.167	0.721306	20.4359	5.63724	0.449911	1.93155	0.368703	3.73351	0.316127	27.538	0.285451	1.3985	6.25755	1.10851	2.08309
RF2|1119219	7094	12	2	1	Low-quality	Genome-fragment	4.15	HMM-based (lower-bound)	Virulent	109.214	82.8343	123.798	70.2162	42.963	110.092	47.9588	116.696	134.748	29.403	11.6014	57.9796	115.54	18.6609	3.53273	54.0938	79.7743	63.3099	13.2596	24.9511	10.5522	92.7238	6.08427	34.8238	163.125	67.2037	157.271	104.316	91.4296	56.6643	52.8795	54.1755	160.358	98.1634	10.9574	86.8093
RE12|1411767	10071	22	5	0	Low-quality	Genome-fragment	9.52	HMM-based (lower-bound)	Virulent	1.12307	0	6.65672	0	117.384	0	3.14252	1.0275	1.1505	8.47287	0	7.01306	0.720231	1.91693	62.8145	0	44.4192	0	0	0	32.4572	0	0	0	0.930404	0	0	1.36919	2.23621	5.86975	7.44965	0	0	0	0	2.57855
RF5|679227	7898	10	0	8	Low-quality	Genome-fragment	3.54	AAI-based (medium-confidence)	Virulent	143.922	107.174	89.1262	133.381	44.0465	103.111	149.266	341.309	100.492	82.831	149.358	144.659	94.5942	52.0296	8.36546	188.759	33.0971	78.3966	146.888	486.149	19.5878	94.0926	125.01	128.537	123.978	110.783	154.472	171.68	99.2311	135.473	120.037	345.13	119.201	105.516	87.9216	182.718
RE11|844109	33526	53	16	0	Low-quality	Genome-fragment	48.45	HMM-based (lower-bound)	Virulent	0.168681	0	2.39957	0	26.3543	0.398208	0.707995	0	0	6.08019	0	0.495689	33.3183	287.424	155.46	0	31.2682	0.13006	1.40285	0	12.4293	0.898629	0.48278	0.690808	0.838462	0	0.71823	0	0.537395	0.176324	48.215	0.106142	0	1.70255	0	0.774579
RE11|311694	5122	10	2	1	Low-quality	Genome-fragment	5.5	AAI-based (medium-confidence)	Virulent	16.5615	2.73157	64.1342	19.7128	94.966	26.0647	6.1789	6.06092	36.1942	11.1064	0	4.05566	1.41614	344.067	15.7164	0	651.352	241.771	9.18233	7.97479	30.6911	34.3115	9.48009	17.3331	10.0616	0	6.26822	0	27.2608	17.3119	73.2384	0	16.5935	2.2288	16.1878	2.89714
RE12|602999	9036	13	1	0	Low-quality	Genome-fragment	16.88	HMM-based (lower-bound)	Virulent	1.25171	0	0	0	2.72561	1.47746	1.75124	0.572599	1.92342	0	0	0	0	37.2362	66.3114	0.751648	3.28058	2.89535	0	1.50682	2.4853	0	0	2.1359	0	0	0	0	0	0	0	0	0	0	0	0
RE6|2024510	6866	17	2	1	Low-quality	Genome-fragment	4.12	HMM-based (lower-bound)	Virulent	6.58924	24.4528	37.1033	0.490188	260.509	0.972206	1.15236	1.50714	4.21886	7.59486	1.33184	37.5162	11.6207	6.82852	42.0308	0.494603	126.775	1.90521	0	0	603.639	27.0588	0	30.3583	4.77648	0	4.67606	0	7.87215	0	13.9072	0	5.71322	9.14471	1.5095	0
RE11|1427388	11757	23	2	1	Low-quality	Genome-fragment	17.95	HMM-based (lower-bound)	Virulent	0	0	15.9659	0	11.5214	0	0	0	0	4.83855	0	0.706748	0	357.964	13.6939	0	1.37528	0	0	0	1.06117	0	0	0	0	0	0	1.56379	0	0	45.2495	0	0	0	0	0.315539
RE9|2421122	8057	9	2	0	Low-quality	Genome-fragment	10.21	HMM-based (lower-bound)	Virulent	19.6532	10.4191	6.65656	23.3928	50.0551	10.7704	10.8021	3.85305	12.9428	2.35352	6.80981	15.9853	107.582	6.16142	0.6598	15.1736	5.68605	74.1435	22.3767	90.8328	19.2013	64.1911	6.69632	231.878	29.6559	9.04973	0	3.99337	13.976	25.6795	5.92571	0.883338	28.4006	1.41689	4.50228	1.84177
RF5|2417142	18251	19	0	15	Low-quality	Genome-fragment	10.08	AAI-based (medium-confidence)	Virulent	19.8309	11.1156	3.67322	57.9042	6.57852	4.38891	6.50272	157.621	8.5705	6.49358	17.5363	62.3728	25.6341	6.19554	0.457713	89.6852	4.42965	5.01717	9.44881	272.484	3.8281	12.9307	12.4157	57.5268	27.9804	3.68774	18.031	62.9605	9.87163	12.308	5.60558	201.411	22.2095	4.69122	14.4808	61.9958
RF5|2106295	9661	14	1	2	Low-quality	Genome-fragment	16.17	AAI-based (medium-confidence)	Virulent	7.02438	2.17231	2.77569	0	1.5933	2.07282	1.63794	1.60667	1.19933	1.96277	4.73266	4.3004	0.375398	1.42735	0.157215	6.6787	0.557882	0	0	3.17101	0.258279	3.6382	1.11691	0.79909	49.9493	49.9278	3.32324	101.814	16.784	36.1012	55.0666	244.577	20.3017	8.86237	6.43676	113.279
RF2|160195	7952	14	1	0	Low-quality	Genome-fragment	8.2	HMM-based (lower-bound)	Virulent	152.901	47.505	18.5472	48.673	42.1989	49.5265	33.8293	97.5981	149.35	54.2495	200.092	65.3078	71.148	31.9075	0.955017	105.91	53.5446	21.9336	88.7171	12.8417	19.2979	29.0464	53.5995	31.5519	245.682	122.021	29.2715	154.33	178.423	136.04	186.98	114.56	256.514	109.106	112.088	185.676
RE12|1274967	16049	18	0	12	Low-quality	Genome-fragment	12.43	AAI-based (medium-confidence)	Virulent	16.9138	108.1	135.759	4.82332	64.261	8.31848	11.8319	5.1582	32.488	34.5596	7.97696	65.4943	26.8914	26.9795	81.0582	0.846394	33.9186	2.71693	12.6989	1.69676	10.4946	57.2551	1.34469	4.32925	23.0618	2.79581	56.0136	1.71838	19.0843	12.1551	36.1232	0.665187	18.3315	67.5751	13.8844	7.16577
RE12|302692	5322	4	0	0	Low-quality	Genome-fragment	6.6	AAI-based (medium-confidence)	Virulent	0	7.88675	15.1161	0	92.5541	0	0	0	0	182.604	1.71823	0.78065	0	8.80959	42.0954	0	50.1297	0	0	0	48.7607	5.66092	0	4.35175	0.880317	0	0	0	0	0	20.505	0	0	0	0	1.39413
RE12|624818	9298	16	2	0	Low-quality	Genome-fragment	25.45	AAI-based (medium-confidence)	Virulent	1.21644	12.0379	4.32608	4.34368	10.2641	2.15374	5.95661	1.66939	0	0	0	3.1278	1.95027	0.593229	53.1715	0	2.02882	0	2.52914	4.02699	0	4.86031	0	1.24543	0	0	1.72649	0	1.45327	0	0	0.76544	2.10943	1.22778	0.557338	0
RE3|2204484	6499	11	5	0	Low-quality	Genome-fragment	7.44	AAI-based (medium-confidence)	Virulent	0	0	0	0	1.8948	0	0	0	0	0	0	0	20.0896	0	0.116853	13.0633	1.24397	205.306	15.6797	5.23759	44.9212	32.4499	0	13.6606	0	0	0	0	0	0	0	0	0	0	0	0
RD5|502369	7075	10	2	0	Low-quality	Genome-fragment	3.08	HMM-based (lower-bound)	Virulent	148.674	120.63	67.2767	149.372	59.1784	95.2921	107.358	292.523	144.117	83.7557	103.4	156.789	109.186	45.608	12.2367	192.477	78.084	54.2353	50.9651	131.826	20.103	66.0036	62.5313	96.5683	186.74	137.147	184.92	211.141	141.333	99.4289	96.4027	267.078	161.713	108.915	49.807	205.022
RD11|1440548	6118	6	2	1	Low-quality	Genome-fragment	6.01	HMM-based (lower-bound)	Temperate	621.168	505.399	310.106	243.703	221.911	418.971	407.373	454.142	431.802	447.867	886.345	270.953	292.248	325.92	44.8111	269.211	262.526	332.126	643.184	275.962	120.724	293.001	571.446	271.298	429.603	546.39	379.151	278.727	395.349	664.769	337.792	294.896	538.585	413.309	565.816	297.729
RE12|170255	5704	10	6	0	Low-quality	Genome-fragment	12.37	AAI-based (medium-confidence)	Virulent	0	0	0	0	0	0	0	0	0	0	0	0	3.81493	0	44.0693	0	9.92144	9.17334	17.8651	0	3.06218	13.2045	13.2421	3.3836	0	0	0	0	0	0	0	0	0	0	0	0
RF11|1211287	6387	12	2	1	Low-quality	Genome-fragment	3.74	HMM-based (lower-bound)	Virulent	104.48	95.2893	123.856	69.0305	39.0426	93.0155	45.8348	109.361	167.805	45.2755	15.749	63.7471	99.9379	17.7039	3.56707	58.4866	82.2759	70.3179	12.2728	20.7848	8.00882	85.6921	12.6708	37.4699	157.709	103.622	134.465	127.377	79.6888	41.6493	43.7827	47.9151	177.085	134.053	18.6612	91.191
RE6|2118931	9154	10	6	0	Low-quality	Genome-fragment	22.54	AAI-based (medium-confidence)	Virulent	0	0	0	3.67668	0.67262	0	0	0	0	0	0	0.907716	0	0	0	3.70979	0	0	0	7.43698	159.598	0	0	0	0	0	0	0	0	0	0	0	0	0	0	0
RE12|951185	8326	12	4	0	Low-quality	Genome-fragment	18.29	HMM-based (lower-bound)	Virulent	0	1.68041	1.61037	0	9.24388	0	0	0	0	0	0	0	0.43559	0	72.331	0	2.26567	1.04742	0	0	2.39754	0.603079	0	0	0	0	0	0	0	0	0	0	0	0	0	0
RF10|26141	12768	11	1	2	Low-quality	Genome-fragment	6.65	HMM-based (lower-bound)	Virulent	146.607	128.208	117.614	134.699	63.1726	142.726	145.005	177.086	152.456	85.3956	185.496	112.586	110.779	52.0566	15.762	100.272	62.0525	84.6944	128.311	90.1097	38.8904	79.44	130.148	108.23	164.388	154.188	138.3	155.516	118.178	108.339	114.85	101.449	179.729	121.598	109.99	145.567
RE6|2141759	5641	8	3	0	Low-quality	Genome-fragment	7.26	HMM-based (lower-bound)	Virulent	0	0	0	0	1.0915	0	0	0	0	0	0	0	7.07214	1.95563	0.673134	1.20402	1.9109	13.1407	11.1167	1.81027	314.061	8.90133	2.86929	2.05283	1.66107	0	0	0	0	0	0	1.26167	0	0	1.83731	0
RD2|676734	16457	33	5	0	Low-quality	Genome-fragment	34.05	AAI-based (medium-confidence)	Virulent	5.84181	2.1254	12.6283	0	252.916	1.21684	0.480773	0	7.04058	2.59252	3.33394	21.9634	150.517	0.335167	61.836	0	27.5102	0.264957	0	5.58458	63.6053	4.57669	0.983514	11.0239	3.98558	0	0.487723	0.279296	0.273694	0	150.028	0	1.1918	0	0.629778	5.861
RF1|937159	23241	52	3	0	Low-quality	Genome-fragment	22.64	AAI-based (medium-confidence)	Virulent	85.6519	58.6951	36.3453	67.918	93.1217	109.716	56.172	70.1265	48.8574	72.207	136.925	61.3155	31.3657	38.2105	5.48961	58.0091	40.5834	57.223	86.3429	46.2818	11.0048	38.8892	157.393	45.8397	80.0294	83.9828	23.8297	96.3139	86.4362	124.124	70.7258	43.7907	77.0778	49.8565	103.683	52.1966
RE6|1388665	6809	14	4	0	Low-quality	Genome-fragment	12.34	AAI-based (high-confidence)	Virulent	0	1.0274	1.96915	0	8.13841	2.94103	0	0	0	0	0	2.44066	6.39164	75.3375	5.79973	18.4535	9.10289	14.0885	31.0829	14.4975	131.56	79.6437	358.942	5.10208	0	0	0	0	0	0	0	0	0	0	0	0
RE12|950725	6358	9	4	0	Low-quality	Genome-fragment	7.56	HMM-based (lower-bound)	Virulent	6.22625	0	0	0	2.42103	2.09977	2.48886	0.813778	0.911189	0.745607	0	3.26724	2.28168	1.30132	62.3501	0	11.8679	5.4865	0	0	7.84913	0	0	1.82133	0	0	1.26242	0	0	0	12.8729	0	0	1.79552	0	0
RE2|2162457	54577	86	1	3	Low-quality	Genome-fragment	25.48	HMM-based (lower-bound)	Virulent	32.1219	31.5317	25.6726	7.27678	14.9481	29.843	46.5357	4.55049	11.0396	32.0514	5.02654	3.04496	14.2206	99.6504	0.751401	0.933345	84.731	9.02806	7.46853	0.686058	5.00629	158.429	1.18626	1.41452	13.9924	23.2255	19.2657	23.9179	129.653	31.8442	32.6172	0.65202	36.5362	18.1979	64.5665	5.50585
RF9|1417991	17141	27	7	0	Low-quality	Genome-fragment	39.31	AAI-based (medium-confidence)	Virulent	4.61892	5.30553	1.56443	9.03209	2.87365	9.73567	2.76953	44.9756	11.8293	3.31876	5.33484	11.8766	5.28954	1.44807	0.575963	58.2467	2.98712	2.03507	8.68878	15.688	4.87664	2.3435	6.60987	7.20612	24.0525	6.21703	29.0322	153.65	84.0871	101.047	33.8219	595.614	12.5867	23.31	7.86041	280.923
RE9|124393	40692	40	5	2	Low-quality	Genome-fragment	28.6	HMM-based (lower-bound)	Temperate	11.2571	31.4604	24.7124	23.0761	85.037	51.0168	20.8049	8.77337	9.11171	6.75693	12.5845	35.4284	69.3402	5.82869	4.12449	7.84475	5.09937	143.375	46.0394	81.0574	14.9314	29.3683	0.795522	333.05	2.87836	12.4051	0.394498	0.564776	1.32827	0.435817	0.335225	1.0494	1.92799	0	0.89145	0.273503
RF8|639134	6984	8	0	8	Low-quality	Genome-fragment	4.88	AAI-based (high-confidence)	Virulent	228.346	311.514	190.061	133.97	142.821	393.781	356.859	221.51	306.091	268.795	445.176	192.74	224.333	159.141	14.6797	141.011	191.773	267.218	481.498	273.424	45.3744	233.663	379.304	271.372	342.121	399.133	372.361	233.636	386.312	471.458	530.287	215.02	401.593	375.954	472.654	227.878
RF6|1901567	5724	9	1	0	Low-quality	Genome-fragment	7.18	HMM-based (lower-bound)	Temperate	274.659	216.319	121.805	88.7859	86.054	160.932	150.667	167.224	179.144	178.89	300.342	135.729	134.957	155.145	16.9824	87.8057	96.5137	131.025	283.473	133.801	56.4523	129.829	216.789	113.292	221.811	187.154	165.465	125.268	142.428	355.264	168.01	150.448	256.99	185.479	270.695	123.141
RE1|1013544	9100	20	3	1	Low-quality	Genome-fragment	4.15	AAI-based (medium-confidence)	Virulent	14.2934	0	5.89361	139.063	4.05967	0.733535	6.95568	183.08	12.096	3.12565	4.01954	119.16	15.9416	4.84909	0.166908	194.054	2.96137	1.91666	1.72278	169.447	2.46782	4.96606	4.74306	70.4133	40.1575	4.31442	7.05622	135.871	11.8792	2.59843	8.99405	154.464	14.3689	13.1722	6.83357	152.468
RE11|49381	11905	24	6	0	Low-quality	Genome-fragment	30.96	AAI-based (medium-confidence)	Virulent	3.3252	6.46376	6.19436	0	106.024	0	0	0	1.94652	137.777	0	6.63064	11.5763	179.537	54.3498	0	54.5535	1.0988	2.63373	0.285923	95.4709	8.01374	0	5.83621	1.96768	4.24013	0	0	7.18853	31.2826	17.7602	0	8.2375	6.23297	0	13.7111
RE6|1939265	5851	16	2	0	Low-quality	Genome-fragment	9.73	HMM-based (lower-bound)	Virulent	2.89961	23.9123	0	2.30089	17.3634	2.28172	0	1.76859	13.862	1.62043	0	2.84028	24.174	6.12767	22.8439	2.32162	11.9751	1.49048	0	3.49059	92.969	20.5964	0.922103	98.2979	0	0	0	0	0	0	0	0	0	0	0	2.53618
RE5|182315	71981	65	2	44	High-quality	High-quality	94.03	HMM-based (lower-bound)	Temperate	30.5619	15.161	12.0145	75.5597	9.02433	12.7047	17.8069	243.674	18.4309	15.1475	25.9161	83.9801	32.9514	11.3028	1.01284	136.676	8.53595	10.7827	18.7306	392.12	4.38515	13.1145	16.04	75.5045	36.514	15.0385	19.9599	93.1011	16.0191	23.9804	13.0761	290.047	29.1555	13.3221	16.3424	91.9962
RD11|185028	29840	29	12	0	Low-quality	Genome-fragment	47.01	AAI-based (medium-confidence)	Virulent	10.4235	256.238	56.3908	4.73715	101.003	25.949	9.01511	0.520174	19.0264	0.953198	4.90319	27.9852	0.486156	25.6938	4.81006	0.569025	11.3791	12.2746	0.262689	0	3.93017	8.58188	20.0694	0.258713	1.25604	6.39066	2.95881	0.770169	8.151	5.1507	14.6284	0.357761	7.88746	25.2497	6.77289	0.497291
RF5|1131585	8256	7	1	0	Low-quality	Genome-fragment	18.75	AAI-based (medium-confidence)	Virulent	210.975	107.611	62.5251	132.489	29.4583	129.364	88.1676	184.249	108.765	198.098	157.281	118.761	109.821	87.5212	8.09469	150.547	74.0953	82.9193	277.239	143.066	29.4677	102.785	247.673	93.0403	251.39	199.73	202.217	209.331	163.669	300.01	156.138	279.734	214.602	178.374	232.869	202.655
RE5|1421088	6644	5	0	5	Low-quality	Genome-fragment	3.21	AAI-based (medium-confidence)	Virulent	88.5223	92.6563	77.6952	78.0113	34.7522	75.3518	128.613	194.687	53.1899	56.3674	130.753	85.0434	60.0451	34.0382	5.02933	98.648	36.099	51.847	110.902	244.381	10.328	67.2622	73.0841	87.1464	82.5031	75.9764	102.686	107.922	64.4035	88.9739	71.8595	163.894	80.6896	83.3341	69.4174	107.765
RE6|2182159	27996	41	16	0	Low-quality	Genome-fragment	40.92	HMM-based (lower-bound)	Virulent	0.808003	14.4929	62.0207	0	231.586	0	0	0.369624	1.24161	9.31317	0	1.1872	2.84998	13.496	73.9193	0.121301	55.0598	0.311501	0	0	100.982	3.94582	0.192714	0.413631	0.669388	0	0.5734	0.328359	0.643546	0.422305	0.730871	0	0	0.815539	0.370205	0.132511
RF7|47295	53058	80	9	0	High-quality	High-quality	100	AAI-based (medium-confidence)	Temperate	0.319756	0.263694	0.126352	0.317165	0.870344	4.52912	0	0	0.87351	0.268041	0.86174	0	0.136708	0	0.0858792	0	7.00911	2.62981	2.06832	0	0.258657	0.378547	4.37247	0.654756	78.8523	443.875	72.1591	60.034	328.021	49.2452	165.698	0.536549	239.91	1191.23	76.1819	25.0312
RE1|410988	5529	19	1	0	Low-quality	Genome-fragment	2.8	HMM-based (lower-bound)	Virulent	52.1642	48.0794	18.1877	120.527	55.1238	49.4993	41.4994	188.094	35.6255	40.2979	59.5406	130.748	32.7973	31.425	3.43385	234.012	30.7064	15.7728	51.0384	192.697	9.25165	16.347	54.6451	81.6821	70.3308	32.4615	42.0993	143.818	55.396	67.3575	34.5404	235.562	63.8529	39.23	65.6084	146.271
RF9|2113926	20889	26	4	0	Low-quality	Genome-fragment	36.88	AAI-based (medium-confidence)	Virulent	1.35363	0	0.320934	13.0507	1.03165	0	0	37.1535	1.10936	0.453882	0.875527	8.75117	8.3337	0.132027	0	94.4537	6.57942	0	0.750505	14.9916	0.0597261	0.480754	0.516562	5.91317	16.5969	0.805507	2.30546	97.0367	3.88124	0	1.30604	118.737	5.63363	0	0	206.011
RF11|1297530	7137	5	1	0	Low-quality	Genome-fragment	3.98	HMM-based (lower-bound)	Virulent	152.929	57.8307	52.6024	62.7195	17.6856	62.6644	47.6698	121.792	60.88	105.612	116.596	58.7945	69.6176	41.3476	4.14989	87.5513	43.4227	53.1532	208.679	92.0491	14.3344	44.3237	128.512	63.2788	141.792	189.394	97.8424	135.244	103.501	158.201	88.8757	146.091	141.987	113.567	174.262	131.509
RF9|1445483	9392	10	0	0	Low-quality	Genome-fragment	20.09	AAI-based (medium-confidence)	Virulent	11.4405	8.9381	4.99658	24.3679	7.53911	31.2721	13.4788	72.7181	23.4398	4.03797	11.6837	23.0026	4.24765	5.28562	1.61718	108.112	11.4772	6.03547	22.5344	31.5311	7.83747	11.2272	12.6379	15.2066	57.8647	28.6648	59.8224	276.507	202.381	424.852	98.0373	999.889	64.7379	66.8521	28.1397	473.994
RF9|134838	9831	15	4	1	Low-quality	Genome-fragment	25.66	AAI-based (high-confidence)	Virulent	18.4078	14.2316	14.3204	48.2712	12.8392	23.7647	20.1202	52.1032	20.6253	12.5374	1.86033	62.1228	22.5033	1.96373	1.54497	101.212	46.3259	4.87889	4.78404	37.0479	4.44173	25.027	9.32956	27.4845	30.0232	10.2693	61.2333	107.534	27.4897	8.41826	13.8755	77.8236	35.9112	27.8692	6.85257	129.433
RF1|265721	7218	13	5	0	Low-quality	Genome-fragment	7.38	AAI-based (medium-confidence)	Virulent	0.783488	1.93836	0.928787	63.8808	0.853029	0.924794	4.38464	50.1773	2.40787	0	3.80068	50.0764	7.03438	1.52836	0.94692	106.329	2.24011	0.6041	1.08599	29.7099	5.53114	0.695655	4.48481	4.81297	18.1742	3.88525	15.5681	163.019	21.8407	27.0265	12.2841	269.182	17.2096	7.11715	4.30767	176.804
RE6|811387	5871	14	2	0	Low-quality	Genome-fragment	5.62	AAI-based (medium-confidence)	Temperate	0	0	0	0	0	0	0	0	0	0	0	0	0	0	0	0	0	0	0	0	47.1762	0	0	0	0	0	0	0	0	0	0	0	1.11358	0	0	0
RE8|59243	7889	10	8	0	Low-quality	Genome-fragment	20.85	AAI-based (high-confidence)	Virulent	0	4.43374	5.09873	0	6.63403	3.38454	0	0	2.93743	0	0	1.05327	1.83888	87.7472	2.59914	6.02652	1.70798	18.7924	25.8341	6.04065	26.0942	44.554	343.314	16.6358	0	0	0	0	0	0	0	0	0	0	0	0
RD1|1412449	39129	67	8	0	Low-quality	Genome-fragment	44.78	HMM-based (lower-bound)	Virulent	27.0266	1.07269	1.54197	234.732	1.02281	1.87653	0.202205	106.841	1.18446	17.2036	2.1033	66.4671	27.9913	3.17172	0	52.6806	0.482097	0.668618	6.41051	45.9317	5.80303	0.128325	0	21.2094	55.7958	0.43002	0	22.0838	3.22311	8.15806	1.74308	87.4877	4.51127	1.60463	3.17849	31.3819
RE5|878599	24801	34	5	0	Low-quality	Genome-fragment	26.64	HMM-based (lower-bound)	Virulent	2.28024	1.6924	0.540622	34.0621	0	0	0	108.274	3.73749	0	0.368713	59.469	3.21712	0	0	51.074	0.651954	0	0	293.026	0.301831	0	0	134.939	1.32234	0.9046	1.29454	24.2782	1.08968	0.953417	0	87.9553	1.05445	0	0	25.429
RF4|441281	7277	6	0	4	Low-quality	Genome-fragment	3.7	AAI-based (medium-confidence)	Virulent	831.535	920.948	480.896	289.989	229.297	592.574	556.683	533.967	665.553	779.129	1234	343.126	358.336	447.589	45.188	297.734	324.775	582.425	1132.12	293.287	136.986	556.152	923.053	308.185	497.026	608.892	484.212	248.862	418.418	790.41	460.198	248.417	624.404	651.823	617.411	298.231
RD7|1725540	6902	7	5	0	Low-quality	Genome-fragment	8.29	HMM-based (lower-bound)	Virulent	0	0	6.79917	1.95053	29.8848	0.967135	0	0	0	309.078	2.6498	1.20389	16.2893	25.9729	6.93191	0	12.4942	0	1.13571	0.986354	10.8457	2.91002	0	5.03333	0	0	0	1.99784	0	0	29.6457	0	0	0	0	0
RF10|559793	8116	6	0	5	Low-quality	Genome-fragment	11.63	AAI-based (medium-confidence)	Virulent	70.3766	25.8584	44.6051	19.4905	13.6556	268.125	187.176	55.4631	162.036	102.218	94.6443	13.8214	33.5146	8.15551	0	16.3186	4.98063	76.8281	92.7194	5.03288	12.2979	17.3232	89.0784	7.13407	199.732	235.656	226.473	75.8888	159.833	136.205	172.277	14.9076	117.61	191.297	68.3203	81.8202
RE2|2253572	20228	49	2	0	Low-quality	Genome-fragment	33.98	AAI-based (medium-confidence)	Virulent	0	0	0	0	0	0	0	0	0	0	0	0	0	0	0	0	143.882	0	0	0	0	0	0	0	0	0	0	0	1.33602	0	0	0	0	0	0	0
RF5|559879	30584	47	7	1	Medium-quality	Genome-fragment	71.72	AAI-based (medium-confidence)	Virulent	0	0	0	0	0	0	4.9153	76.1281	0	0	0	0.271686	23.2421	0	0	15.5451	0	0	0	6.01004	0	0	0	0	2.14461	0	0	65.8256	0.294545	1.15971	0	226.073	1.06883	0	9.82747	25.594
RF5|2074099	6144	12	2	0	Low-quality	Genome-fragment	10.45	HMM-based (lower-bound)	Virulent	0	0	2.18229	48.7535	0	0	0	193.688	3.77171	0	0	36.5152	1.18057	0	0	161.396	0	0	0	74.7929	0	0	0	18.2194	3.05016	0	13.0639	54.6118	1.4662	1.92429	0	236.309	2.1282	0	0	71.2492
RE6|1013520	5403	9	1	0	Low-quality	Genome-fragment	4.91	AAI-based (high-confidence)	Virulent	0	0	0	0	1.13958	0	0	0	0	8.77396	0	0	42.2883	3.06265	0	0	0	0	0	0	43.6424	0	0	0.714419	3.46848	0	0	0	0	0	7.57412	0	0	2.11288	0	0
RE6|359910	16650	12	2	0	Low-quality	Genome-fragment	8.91	HMM-based (lower-bound)	Virulent	33.2859	0.840306	62.0068	0	33.282	4.81093	1.9008	0	28.8797	3.70135	0	2.99432	0	0.331282	0.638559	2.85545	0	14.1418	0.941579	0	67.2141	0	2.5923	2.31832	2.81384	0	0	3.3127	4.32834	2.13024	0.819278	0	0	0.685641	0.622478	0.891241
RD2|386006	26974	28	15	0	Low-quality	Genome-fragment	43.33	AAI-based (medium-confidence)	Virulent	19.0785	0.518688	2.48535	128.516	110.251	0.494933	3.22655	5.3708	10.3092	0.527238	4.74613	4.92874	0	0	0.0844624	5.16177	1.09896	4.6879	0.871801	1.13573	3.05267	0	0.400032	1.71721	0	0	0	0	2.33775	0	1.76998	0.395773	0.48475	0.423219	0.960578	0
RE12|1100643	6201	13	4	0	Low-quality	Genome-fragment	13.84	AAI-based (medium-confidence)	Virulent	3.64794	2.25627	0	4.34205	3.97172	4.30586	7.65562	0	0	1.52897	0	0	16.3761	13.7874	50.2122	2.19058	25.2058	12.6572	12.6409	0.548929	4.42632	4.85848	1.74012	16.1845	0	0	0	0	0	0	0	0	0	0	0	0
RE12|736548	7368	18	3	0	Low-quality	Genome-fragment	10.05	HMM-based (lower-bound)	Virulent	7.67537	2.84835	70.0606	0.913581	23.3986	3.62387	0	0	11.7943	1.2868	0	10.1497	8.86007	10.4807	52.051	0	4.38901	0	1.06388	0	22.8595	2.72597	1.4645	10.4778	0	0	8.71494	0	0	0	11.1083	0	0	0	0	2.014
RE12|1969494	10442	14	5	0	Low-quality	Genome-fragment	28.53	AAI-based (high-confidence)	Virulent	2.16633	0	0	1.28927	3.53792	1.91778	6.06174	0	4.43849	0	0	0.397876	16.3241	14.7906	50.8371	0	114.329	4.59341	12.011	6.19367	12.665	4.32783	0	16.6348	8.97347	0	0	0.440181	17.6854	2.26448	5.22543	1.02237	1.25222	0.546635	0	1.06583
RE6|1621212	5570	12	2	0	Low-quality	Genome-fragment	6.75	HMM-based (lower-bound)	Virulent	1.0153	0	0	0	0	0	0	0	0	0	0	0	0	1.98055	0	4.87748	0.967631	84.5463	0	1.83334	59.5811	1.80296	0	99.0989	0	6.04174	0	0	0	6.36778	0	0	2.34751	0	0	0
RD10|1887824	5222	4	3	0	Low-quality	Genome-fragment	7.24	HMM-based (lower-bound)	Virulent	283.735	215.681	133.515	122.457	67.7972	155.95	119.696	172.401	126.473	131.632	211.888	116.953	106.26	58.0948	13.234	77.3874	79.9889	107.716	87.0627	64.5322	37.9876	114.425	105.384	43.6117	115.736	127.813	113.741	125.868	93.1542	93.9579	91.4275	49.0644	151.489	135.539	64.5037	93.7749
RF9|2641414	5028	3	0	0	Low-quality	Genome-fragment	12.28	AAI-based (medium-confidence)	Virulent	282.311	296.351	190.666	235.621	110.212	308.003	245.482	375.599	282.293	207.424	400.115	265.241	202.687	104.766	44.5568	181.009	144.712	168.241	307.123	198.358	75.4328	125.831	237.141	211.118	315.877	315.687	317.674	277.903	198.872	265.708	290.291	188.259	327.672	280.403	234.989	284.063
RE6|1695225	10380	25	7	0	Low-quality	Genome-fragment	8.12	HMM-based (lower-bound)	Virulent	1.08964	0	0	0	0	0	0	0	0	0	0	0	0	0.531391	0	0	2.5962	0	0	0	98.92	10.6423	0	1.11561	0	0	0	0	0	0	0	0	0	0	0.998483	0
RD2|1105296	10345	11	2	1	Low-quality	Genome-fragment	3.42	HMM-based (lower-bound)	Virulent	9.29324	0	0.648041	3.90407	126.774	0	0	0	22.4005	0	0	4.01606	8.41386	1.06638	1.46821	1.31308	58.091	5.05797	1.51545	3.29039	2.17082	0	0	38.059	14.4922	0	0	1.77723	24.8176	0	0	0	1.26396	0	0	0
RD2|183654	7848	14	2	0	Low-quality	Genome-fragment	17.4	AAI-based (high-confidence)	Virulent	0	1.78276	18.793	0	145.534	0	19.1551	2.63711	4.42916	0	0	6.35263	0	0.702834	6.48341	0.432715	13.0485	2.77803	1.99762	1.73492	28.6151	2.55925	0.687465	5.4103	0	1.42934	14.3183	0	2.29571	0	3.4763	0	1.66611	0	0	0
RE1|660649	6112	8	0	7	Low-quality	Genome-fragment	3.5	AAI-based (medium-confidence)	Virulent	105.48	141.925	93.2328	74.8897	32.2364	90.6477	106.15	118.514	115.639	61.2738	88.2726	81.5697	66.4583	33.8423	5.09434	194.467	50.2639	67.7745	93.6226	29.5169	10.8187	75.5815	57.3773	47.3659	96.5831	91.7661	52.5292	136.116	67.0616	47.392	56.9118	108.293	91.9917	125.142	43.2409	143.245
RF2|2333913	8531	23	3	0	Low-quality	Genome-fragment	17.31	AAI-based (medium-confidence)	Virulent	1.9887	18.0403	14.9309	9.46843	6.49566	15.6492	18.549	8.49092	0	15.0036	17.1505	12.1751	2.12561	6.78893	1.42432	16.719	13.8991	11.2447	16.5392	3.19204	0.877472	14.7147	13.2809	2.71481	19.7704	57.856	71.5052	17.7799	434.526	94.932	83.947	47.9699	16.0936	28.1015	35.2319	61.3153
RE12|951252	8199	20	1	0	Low-quality	Genome-fragment	4.48	HMM-based (lower-bound)	Virulent	0	0	0	0	1.50193	0	0	0	0	0	0	0	0	0	44.6451	0	0	0	0	0	0	0	0	0	0	0	0	0	0	0	0	0	0	0	0	0
RD3|804010	8375	11	4	0	Low-quality	Genome-fragment	17.05	AAI-based (high-confidence)	Virulent	1.3505	0	0	0.803733	0.735183	349.101	0	0	0	1.13208	0	0.992148	0.866083	0	0	0	0	0	0	0.812874	0	0	0	0	0	0	5.7503	2.19528	0.537813	1.41168	0	0	1.56127	0	0	0
RE2|1699156	6155	13	0	1	Low-quality	Genome-fragment	6.15	AAI-based (medium-confidence)	Virulent	38.5896	185.26	111.098	37.1833	69.5244	149.663	51.4189	44.5527	108.243	56.2245	19.314	46.5749	36.5324	23.3001	11.228	73.9328	129.16	87.8455	19.1031	18.8031	11.7566	114.212	3.50624	83.4087	59.3718	134.865	95.196	77.6641	139.04	27.8524	86.4335	24.8606	122.153	205.876	18.5226	137.422
RF9|54780	15338	14	0	11	Low-quality	Genome-fragment	20.93	AAI-based (medium-confidence)	Virulent	143.058	202.961	209.8	113.665	67.0391	273.308	335.301	221.965	155.995	136.611	533.595	124.871	129.576	91.8827	6.58522	204.58	90.8357	125.371	375.119	42.166	14.8042	151.901	331.002	76.7572	198.239	254.511	267.932	243.334	155.347	253.985	336.622	175.63	180.304	222.543	308.806	223.245
RE12|1954117	7164	10	6	0	Low-quality	Genome-fragment	16.47	AAI-based (medium-confidence)	Virulent	0	0	0	0	5.15675	0	0	0	0	0	0	0	0	0.769939	48.1269	0	22.1938	0	0	0	2.61227	0	0	0	0	0	4.48155	0	0	0	7.61641	0	0	1.59351	0	2.58919
RE12|81968	16000	26	4	1	Low-quality	Genome-fragment	18.68	AAI-based (high-confidence)	Virulent	2.82761	0	4.18999	0	19.2411	0	0	0	0.724167	6.51829	0	0	0.906681	0.17237	46.7049	0	2.52642	0	0	0	0.623809	0.313827	0	3.61876	1.17126	0	0	0	0	0.738928	0	0	0	0	0	0
RE6|809218	42140	75	11	0	Medium-quality	Genome-fragment	56.07	HMM-based (lower-bound)	Virulent	1.61041	40.5058	3.18177	1.11815	83.8683	0.633618	3.19187	0.122781	75.8881	0.562479	0.434003	28.9857	37.6098	1.24349	2.82939	3.06231	53.2064	2.27643	2.04616	4.92735	102.883	19.065	1.40834	22.0755	6.00362	0	3.61895	0.218148	33.8829	0.280561	1.78038	0.844454	11.6359	2.16724	1.35271	2.90515
RE12|1386349	7195	20	1	0	Low-quality	Genome-fragment	9.52	HMM-based (lower-bound)	Virulent	0	0	0	0	0	0	0	0	0	0	0	0	0	0	63.2242	0	0	47.2704	130.735	0	0	1.39576	5.99886	0	1.30231	3.11814	4.46224	0	0	0	0	0	0	0	0	0
RE6|2202174	6206	7	5	0	Low-quality	Genome-fragment	7.41	AAI-based (medium-confidence)	Virulent	0	0	0	2.16928	0	0	2.54982	0	0	0	0	0	0.58439	7.11033	0	0	0	0	2.52615	2.19395	68.9548	4.04547	4.34678	1.24396	0	0	0	0	1.45156	0	1.09902	0	0	0	0	0
RE12|428979	7044	14	3	0	Low-quality	Genome-fragment	7.18	HMM-based (lower-bound)	Virulent	0	1.98624	0	0	0	0	0	0	0	0	0	0	2.05947	0	45.8202	0	0.765148	0	0	0	0	0	0.765932	0	2.66045	1.59249	2.27895	0	0	1.67843	1.93654	0	0	0	8.09247	0
RE12|760810	5455	14	1	0	Low-quality	Genome-fragment	3.24	HMM-based (lower-bound)	Virulent	4.14681	0	7.37377	1.85094	3.38616	2.44736	2.90085	0	4.2481	1.73806	1.67634	1.52323	5.31875	9.10038	30.9062	0	0.98803	14.3881	2.87393	0	34.9928	11.0458	0	8.4913	8.58854	2.05637	0	0	0	0	5.00128	0	0	0	0	0
RE7|373158	7475	5	0	0	Low-quality	Genome-fragment	17.2	AAI-based (medium-confidence)	Virulent	48.4192	8.42274	262.778	11.7065	76.1923	87.5139	266.735	22.8417	50.3769	99.5679	13.4567	616.94	12.1295	23.9819	18.2873	0	5.40773	1.16666	8.38919	1.82149	2.00287	240.482	3.60885	33.5653	45.7536	3.00134	35.4345	0	8.43592	132.859	170.626	26.6592	105.83	8.39967	180.248	9.42957
RE6|2198767	5826	12	1	0	Low-quality	Genome-fragment	8.12	HMM-based (lower-bound)	Virulent	0	0	0	0	22.1937	2.29151	0	0	0	1.62738	0	0	1.86752	7.57411	24.5061	0	15.7269	0	0	0	41.3303	4.30934	0	0	0	0	0	0	0	0	9.36559	0	4.48872	0	0	0
RF12|750992	7114	14	1	1	Low-quality	Genome-fragment	15.11	AAI-based (medium-confidence)	Virulent	66.7751	148.486	143.239	41.6328	31.5907	193.293	147.921	22.5463	87.9506	78.6319	205.666	52.5605	61.6859	61.2527	6.19158	12.4114	98.8693	93.7785	120.103	14.8329	10.1718	116.461	133.478	59.1426	96.8094	144.279	262.885	34.8895	166.517	142.094	103.544	9.50408	101.091	154.855	101.982	35.4605
RD12|1971047	5368	5	2	0	Low-quality	Genome-fragment	7.52	HMM-based (lower-bound)	Virulent	35.8192	212.421	427.117	11.2857	7.45558	46.0099	5.89574	0	4.31694	5.2987	17.0351	129.251	1.35124	0	14.7132	40.4881	11.5465	1.62459	18.9833	0	0.464836	1.8708	63.3195	4.31446	78.5496	51.1976	198.867	27.4001	62.931	68.2765	57.1763	9.28081	18.2689	138.233	105.226	46.9944
RE9|872539	9537	7	1	0	Low-quality	Genome-fragment	13.54	HMM-based (lower-bound)	Virulent	0	0	0	0	0	0	0	0	0	0	0	2.61379	0.380279	4.33772	0	6.40946	0.565136	3.65767	0	45.6852	0	0	0	160.277	0	1.17621	0	0.963903	0	0	0	0.746258	0	0	0	0
RE3|25288	5328	11	2	0	Low-quality	Genome-fragment	6.38	HMM-based (lower-bound)	Virulent	97.6501	0	5.03302	0	0	27.5626	4.455	0	25.0088	19.5744	0	0	1.36138	4.65865	94.7862	0.637377	16.1853	274.161	1.47122	8.30533	119.891	98.0122	5.06309	5.07133	0	0	93.4009	0	19.4437	1.1095	56.3254	0.667892	4.90828	9.64182	0.972621	2.08885
RE12|657544	40836	79	18	0	High-quality	High-quality	100	AAI-based (high-confidence)	Virulent	0	0	0.656674	0	0.226167	0	0	0	0	0	0	0	0.0888119	0	123.949	0	0	0	0	0	0.122208	0	0	0	0	0	0.786214	0	0.220598	0	5.51171	0	0	0.279555	0	0.0908461
RE6|2257382	11927	20	2	0	Low-quality	Genome-fragment	20.59	HMM-based (lower-bound)	Temperate	0	0	0	0	0.258119	0.559669	0	0	0	0	0	0	0.608153	1.84987	0.254693	0	30.9545	3.29031	7.88663	0.57079	90.9014	0.841996	1.35706	0	0	0	0	0	0	0	0	0	0	0	0	0
RE6|1169915	5385	6	5	0	Low-quality	Genome-fragment	5.78	AAI-based (medium-confidence)	Virulent	0	0	4.97975	0	1.14339	0	0	0	0	0	0	0	1.34697	30.2168	0.846161	6.93693	4.00349	9.71676	17.4677	17.6991	79.236	55.947	92.1747	2.86723	0	0	2.98104	0	0	0	0	0	0	0	0	0
RF11|1204778	10179	22	1	0	Low-quality	Genome-fragment	6.09	HMM-based (lower-bound)	Virulent	87.7811	94.841	38.858	4.29838	20.5662	129.844	34.9783	9.65773	132.611	120.156	135.653	15.1018	21.3777	43.6217	1.86519	5.00434	12.4431	59.5437	39.2741	0.66881	10.2957	43.9032	117.668	9.48032	80.5465	128.386	35.4839	3.61243	86.287	130.087	40.2033	1.04879	89.2777	93.6466	91.1288	9.11138
RD10|1097336	6197	14	1	0	Low-quality	Genome-fragment	3.53	HMM-based (lower-bound)	Virulent	164.263	13.5463	6.49087	0	2.48393	23.6975	2.55352	1.66984	72.9192	22.1844	0	1.34085	4.09667	10.681	78.4307	0.547998	21.3083	209.682	7.58946	3.84498	101.066	123.971	12.1887	7.47459	0	0	93.2556	2.96684	39.9758	1.90783	42.9239	0	6.32999	8.28976	2.50869	2.39457
RE6|1864113	8626	10	1	4	Low-quality	Genome-fragment	3.98	HMM-based (lower-bound)	Virulent	3.93361	11.3538	4.6631	0	33.5482	0	5.50342	0	10.7458	0.549568	2.12021	0.963278	10.511	18.5439	24.9152	0	11.2468	11.6264	5.45234	0.39461	61.6144	5.82105	0	4.02736	0	0	0	0	0	0	1.58138	0	0	0	0	0
RD7|84887	5212	3	0	2	Low-quality	Genome-fragment	2.15	AAI-based (medium-confidence)	Virulent	201.817	228.174	253.393	118.817	82.1034	274.076	300.574	182.659	208.969	275.594	249.139	177.759	95.3302	105.83	32.0557	105.553	130.296	169.831	281.241	92.0858	45.0024	149.327	218.418	128.864	243.601	300.238	417.339	183.431	264.443	310.769	293.129	119.482	263.42	261.743	254.533	167.268
RE6|562224	7089	11	4	0	Low-quality	Genome-fragment	3.79	AAI-based (medium-confidence)	Virulent	0	0	0	0	0	0	0	0	0	0	0	0	0	29.1782	0	6.70662	3.42131	0	13.269	0	57.7259	61.6233	85.2399	0	0	0	0	0	0	0	0	0	0	0	0	0
RF5|2200495	17481	19	2	0	Low-quality	Genome-fragment	17.03	AAI-based (high-confidence)	Virulent	175.017	96.8436	75.1663	146.709	178.047	202	117.226	138.814	95.114	157.829	275.155	111.94	60.1653	76.0436	13.5977	94.0242	94.1911	105.761	184.745	85.8717	25.5505	64.3417	285.486	80.3754	130.788	168.124	55.0984	149.084	152.278	242.463	131.096	97.3043	155.956	113.304	193.874	102.289
RE9|2120318	7329	15	1	0	Low-quality	Genome-fragment	1.87	HMM-based (lower-bound)	Virulent	9.25946	0	1.82944	6.4291	6.72088	12.751	25.9094	0	20.5522	1.94047	22.4587	9.06998	146.969	2.25781	1.96878	0	3.30927	75.5588	59.8942	22.7577	5.10691	2.74048	4.41689	208.037	2.55699	9.18337	0	0	1.22914	2.41974	3.72247	0	3.5682	0	0	0
RF1|2049027	5454	8	0	0	Low-quality	Genome-fragment	1.97	AAI-based (medium-confidence)	Temperate	1.03689	10.2612	7.37512	7.40513	16.9339	17.1346	8.70416	0	10.6222	1.73838	43.5929	0	1.32993	2.02268	0	6.22652	6.91748	9.59383	25.8701	0	1.37252	3.68261	14.8384	7.78512	214.753	208.76	582.779	210.688	317.952	257.961	546.49	26.0985	478.29	303.503	460.823	232.627
RD2|2026395	10456	34	3	0	Low-quality	Genome-fragment	7.48	HMM-based (lower-bound)	Virulent	2.16343	9.36665	0	9.97844	196.386	3.19203	0	0.989671	2.21627	0	0	2.38406	1.04057	0.263764	2.54208	1.29914	3.35052	0.834047	0.74968	0	0.596604	41.7796	1.03199	0.369167	3.58458	3.7549	3.07056	4.39592	1.7231	0	0	3.063	1.87581	2.72951	1.98245	3.1932
RE11|2170682	5792	7	4	0	Low-quality	Genome-fragment	7.09	HMM-based (lower-bound)	Virulent	0	0	5.78728	0.581083	4.25218	0	0	0	0	0	0	0	0	68.0909	1.96675	0	1.86109	4.51698	13.5336	0.587691	9.69317	21.6732	168.601	3.33219	0	0	0	0	0	0	0	0	0	0	0	0
RD2|724900	14385	26	6	1	Low-quality	Genome-fragment	29.14	AAI-based (medium-confidence)	Virulent	0	1.94523	18.6416	0	142.105	3.71229	15.4006	0.719361	3.22188	0.659099	0	5.77632	0.504237	0	4.27625	0	14.987	4.54681	3.26951	0.473258	27.4068	6.98122	1.50024	5.09837	0	0	7.25366	0	3.13116	0	0.948278	0	0.908979	0.793599	0	1.03157
RD12|74984	10362	2	1	0	Low-quality	Genome-fragment	17.22	AAI-based (high-confidence)	Virulent	14.1899	254.519	362.955	6.49611	93.5874	32.2098	24.4341	20.4723	14.5365	6.86244	4.41249	149.152	0	1.06463	1.4658	0.655461	4.94134	2.94564	0	0	0.481613	9.20706	7.81011	2.98012	2.71282	0	9.29526	1.77432	14.7792	4.56393	11.1898	4.80789	5.04754	15.4239	2.00043	8.59245
RF1|943320	5499	8	1	1	Low-quality	Genome-fragment	4.67	HMM-based (lower-bound)	Virulent	50.392	50.886	54.8608	122.409	17.3552	70.4055	53.2364	115.731	43.1946	31.0348	51.5508	80.8409	60.6762	26.0796	1.10483	63.6083	21.0727	40.4401	19.9566	36.5213	4.7645	62.0921	48.0753	49.1363	124.389	67.3172	110.931	132.065	82.7282	47.3	50.8529	106.775	109.38	55.014	55.6002	150.442
RE8|506441	6750	13	1	1	Low-quality	Genome-fragment	3.96	HMM-based (lower-bound)	Virulent	172.589	286.04	396.28	39.3904	109.005	295.685	438.388	21.4625	180.237	174.874	505.315	43.0849	47.2817	91.1135	27.1144	15.0931	98.6116	173.77	373.933	8.5728	26.8007	209.032	332.506	37.7423	52.7502	202.746	285.385	27.2377	112.771	203.178	276.861	11.071	116.228	213.943	224.943	21.9839
RD2|380190	30138	51	6	0	Low-quality	Genome-fragment	40.33	HMM-based (lower-bound)	Virulent	0	0	0	0	275.395	0	0	0	0	0	0	0	0	0	0	0	0	0	0	0	0.0413969	0	0.895087	0	0	0	0	0	0	0	0	0	0	0	0	0
RF4|438006	7100	14	2	0	Low-quality	Genome-fragment	8.34	HMM-based (lower-bound)	Virulent	0	0	0	0	0	0	0	0	0	0	0	0	0	1.9422	1.60443	0	0	0	0	0	0	0	0	0	0	0	0	0	0	0	339.103	0	0	0	0	0
RD2|1846647	8286	21	4	0	Low-quality	Genome-fragment	8.21	HMM-based (lower-bound)	Virulent	0	1.68852	0	0	147.501	0	0.954873	0	0	0	0	0	0	1.99705	0	0	4.87844	4.20989	0	0	1.50569	0	3.90675	0	1.13083	0	0	0	1.08718	0	0	0	0	0	0	0.895436
RE12|1057232	5208	6	2	0	Low-quality	Genome-fragment	7.33	AAI-based (medium-confidence)	Virulent	0	0	0	0	2.3645	0	0	0	0	65.5379	0	1.59548	0	4.23644	31.4971	0	0	0	0	0	0.479116	0	0	0	0	0	0	0	0	0	2.61924	0	0	0	0	0
RF8|2215985	15718	38	2	0	Low-quality	Genome-fragment	8.4	HMM-based (lower-bound)	Temperate	0	0	0	0	0	0	0	0	0	0	2.32713	0	0	0	0	0	0	0	2.99223	0	0	0	0.686503	0	0	0.713672	0	0	0	42.8746	16.4893	0	0	0	384.753	0.944087
RE6|927579	5253	6	5	0	Low-quality	Genome-fragment	14.29	AAI-based (high-confidence)	Virulent	22.6079	14.649	1.27622	45.4902	69.1552	13.9781	48.1985	10.8346	25.3659	30.6833	15.6672	30.8453	316.898	18.9007	4.62626	36.8492	10.7732	114.551	73.1189	228.094	57.9514	94.6322	26.704	606.961	80.2692	20.2867	1.52798	6.99999	9.43194	50.6404	12.984	10.8388	69.697	14.1259	25.6492	12.712
RF5|1044814	5522	12	2	0	Low-quality	Genome-fragment	9.58	AAI-based (high-confidence)	Virulent	0	0	0	0	0	0	1.43283	66.5255	0	0	0	0.752376	9.85166	0	0	17.2196	0	0	0	2.46571	0	0	0	0	5.0906	0	0	69.9194	0	1.07052	0	172.707	0	0	2.81535	20.1546
RD5|1841932	5528	6	0	1	Low-quality	Genome-fragment	12.46	AAI-based (medium-confidence)	Virulent	254.73	241.706	225.568	113.852	61.2597	166.638	233.298	286.405	254.664	196.38	340.766	160.082	135.805	90.7999	28.5748	97.0621	65.3238	150.658	171.577	96.6739	49.8777	113.541	108.334	99.1535	216.116	228.286	252.642	147.17	144.218	191.415	194.942	151.92	250.727	231.292	176.237	150.995
RE12|1411832	5466	12	2	0	Low-quality	Genome-fragment	3.36	HMM-based (lower-bound)	Virulent	0	2.55966	9.81191	0	13.5174	0	0	0	0	3.46913	0	0	0.663506	3.02736	320.528	0	7.88833	0	0	0	6.84752	0	0	0.706185	0.857125	3.07835	0	0.840902	0	0	24.9561	0	0	0	0	0
RE1|2172647	5643	8	3	0	Low-quality	Genome-fragment	10.67	AAI-based (medium-confidence)	Virulent	46.0996	3.71906	5.94009	143.142	23.459	17.7437	2.80421	245.726	15.3996	13.4413	30.7894	81.7229	46.9167	15.1507	0	226.276	5.73068	5.40896	15.28	397.515	5.96947	3.55927	17.2097	69.7715	81.3636	6.95751	2.84475	189.785	12.771	51.3308	2.41733	242.154	44.0258	10.1151	32.1415	155.807
RE11|929954	7694	15	1	0	Low-quality	Genome-fragment	3.4	HMM-based (lower-bound)	Virulent	73.5016	44.5519	129.828	18.8097	82.8264	399.955	89.466	6.72472	12.0475	71.4721	165.204	41.0386	21.683	87.1035	3.15853	10.593	58.1421	55.5392	166.064	14.5996	6.8105	119.429	286.1	18.5625	72.4617	77.2715	44.858	17.9219	70.8352	149.053	66.4852	18.0378	40.7871	77.8965	204.079	49.181
RE6|1580305	15156	13	1	4	Low-quality	Genome-fragment	35.2	AAI-based (medium-confidence)	Temperate	0.746267	20.7706	21.2319	0.888264	18.8907	0.880861	1.04409	0	2.29348	91.9588	1.20671	6.57897	1.43576	64.417	73.4075	0	4.8008	0	1.0344	0	73.0165	3.31304	0	1.27342	0	0	0	0	0	0.780077	7.20031	0	0	3.01291	0	0
RE12|1083246	15017	26	1	1	Low-quality	Genome-fragment	16.6	HMM-based (lower-bound)	Temperate	1.50635	5.59011	37.4998	0	81.5925	0	0	0	7.71571	1.89408	0	12.1731	3.38111	6.97882	69.0298	0	37.6852	0	0	0	6.56335	12.0373	0	3.34155	0	0	0	0	1.79963	0	8.17532	0	0.435362	1.5204	0	2.47039
RE6|2203896	11855	15	3	1	Low-quality	Genome-fragment	11.7	HMM-based (lower-bound)	Virulent	3.81625	5.31084	0	1.1356	34.0189	1.12614	0	0	1.46605	0.799759	1.54272	4.90634	32.122	9.53815	31.8377	2.29165	26.1415	5.88497	0	1.14851	95.8735	39.8141	1.82041	134.148	0	0	0	0.775431	0.759879	0	0	0	0	0.962962	0	0
RE8|1555234	21692	28	5	0	Low-quality	Genome-fragment	36.25	HMM-based (lower-bound)	Virulent	0	0	0	0	0	0	0	0	0	0	0	0	0	0	0	0.313106	0	0	6.14314	0	0	0	317.366	1.06768	0	0	0	0	0	0	0	0	0	0.526273	2.38896	0
RE8|735928	5547	8	3	0	Low-quality	Genome-fragment	8.37	HMM-based (lower-bound)	Virulent	8.15607	0	0	0	0	0	0	0	0	0	0	2.99594	0	0	0	0	0	0	0	0	0	0	270.394	0	0	0	0	0	0	0	2.45916	0	0	0	0	0
RE9|1859750	130750	148	32	2	Complete	High-quality	100	DTR (medium-confidence)	Virulent	11.7213	8.34651	1.02547	3.62948	15.8226	9.95532	3.14668	0.197859	8.99463	2.03038	8.60242	10.5494	168.175	4.8725	2.66018	3.35049	10.8206	65.631	28.0573	10.9602	36.8894	33.795	4.86912	410.651	4.94483	9.43728	0.245551	0.281231	0.172244	0.949445	0.260822	0.136081	0.60003	0.349244	0.317071	0.53909
RD1|244576	12072	11	1	0	Low-quality	Genome-fragment	17.93	HMM-based (lower-bound)	Virulent	2.81074	0	0	165.048	2.04015	14.3766	8.5203	5.14314	7.67838	0	0	0	0	0	0	0	0	0	0	0	0	0	0	0	0	0.929216	0	0	0	0	2.25994	0.589551	0	0	0	0
RE12|1458940	5161	6	0	0	Low-quality	Genome-fragment	13.7	AAI-based (high-confidence)	Virulent	1.09576	4.06639	19.4846	0	31.615	0	1.53305	0	0	0	10.631	8.05003	0.702717	1.06875	48.5588	0.658001	4.69941	0.844874	1.51882	0.659544	1.69218	5.83752	13.59	0	0	0	9.33128	0	0	0	7.92927	0	0	0	0	0
RE5|1776303	6650	7	3	0	Low-quality	Genome-fragment	14.33	AAI-based (high-confidence)	Virulent	20.4098	24.1951	30.2435	58.2027	15.7401	16.0605	21.4162	206.182	20.0371	27.089	41.2531	81.2181	27.814	15.7595	1.142	111.326	7.29433	7.86838	25.9324	297.906	8.44253	17.3667	17.0376	77.7806	38.044	17.7118	25.3467	93.3098	10.8371	25.7791	19.4871	260.067	30.4771	23.1752	31.95	85.3531
RE9|402607	12114	22	3	0	Low-quality	Genome-fragment	22.5	AAI-based (medium-confidence)	Temperate	16.3392	1.73243	0	41.9523	10.1654	3.30617	1.95941	5.12531	13.3906	0	1.50973	17.8339	79.3364	0.227664	0.12538	13.4559	1.33475	8.99867	1.29415	180.395	36.0464	2.90149	0	245.353	10.4422	0	0	0	0	0	0	3.52504	1.07938	0	0.42778	0.30624
RE4|682083	5233	4	0	4	Low-quality	Genome-fragment	4.68	AAI-based (medium-confidence)	Virulent	292.865	255.332	247.252	102.262	69.4196	190.063	335.655	122.602	192.632	170.309	300.563	105.592	71.384	80.1078	24.0904	72.0332	67.9764	120.821	402.942	44.2319	23.3645	141.051	225.789	87.7777	144.142	157.555	151.848	84.3209	148.045	196.558	264.582	99.9625	181.155	164.705	194.095	85.0707
RD2|661974	26167	39	5	1	Medium-quality	Genome-fragment	52.87	AAI-based (medium-confidence)	Virulent	0	18.9813	60.9756	0	140.005	0.765296	1.81421	0	2.21399	1.26816	0	1.90528	0.138599	14.1232	182.493	0	8.4449	0.333274	0.299562	0	10.5371	28.9757	0.824738	1.62266	0.179044	0.214344	2.14718	0	1.37706	0	0	0	0.9994	2.18136	0	1.13419
RE12|1262400	18718	40	13	0	Low-quality	Genome-fragment	18.55	HMM-based (lower-bound)	Temperate	0	2.2424	0	0	0	0	0.845398	0	0	0	0	0	2.71258	0	51.3238	0	0	0	0	0	0	1.60954	0	0	4.00474	2.6968	3.43048	0	0	2.84233	4.37258	0	0	0	6.64446	0
RE6|1241841	7818	13	3	0	Low-quality	Genome-fragment	6.9	HMM-based (lower-bound)	Virulent	0	0	0	0.860996	0	0	0	0	0	0	0	0	0	0.705531	0	4.34375	0	11.7125	0	5.22472	66.3864	14.1299	1.38021	0	0	0	0	0	0	0	0	0	0	0	0	0
RF5|1010705	5689	6	3	0	Low-quality	Genome-fragment	12.87	AAI-based (medium-confidence)	Virulent	15.905	17.2153	37.7092	24.8473	1.08229	28.1603	50.0677	77.3054	8.14672	53.3304	11.2517	21.9087	21.0374	5.81738	0	105.06	1.89478	3.06584	30.3129	11.9666	1.75443	1.76525	55.9533	1.35701	58.4704	53.2382	33.8609	31.5097	14.2512	161.06	15.5856	185.151	19.5365	40.1333	80.1595	73.6872
RE6|239923	5593	12	2	0	Low-quality	Genome-fragment	5.06	HMM-based (lower-bound)	Virulent	2.02225	12.5077	41.9524	0.601758	31.9252	3.58046	5.65856	0	6.21492	15.2566	0	10.3995	30.4767	14.7931	307.954	1.21435	42.8825	7.79617	12.6136	0	59.3361	35.0131	3.85856	15.1833	1.67533	0	8.61054	1.64362	0	0	18.292	0	0	2.04111	0	1.32658
RE3|1445689	6102	8	8	0	Low-quality	Genome-fragment	13.87	AAI-based (medium-confidence)	Virulent	0	0	0	0	0	6.56359	0	1.69584	0	0	0	1.36172	5.34915	17.1749	0	32.2787	0.883268	237.957	1.2846	68.0558	13.4944	0	5.30504	0	0	0	0	0	0	0	0	0	0	0	0	0
RE2|275915	15255	27	8	1	Low-quality	Genome-fragment	22.23	AAI-based (medium-confidence)	Virulent	0.370712	0	15.3812	0	49.8466	0	1.03731	0	1.89883	0.932266	0.599439	2.4511	0	2.53103	25.2396	0.222612	33.3875	0.285834	0	0	23.881	2.63323	0	1.51819	0.921347	0	0	0	4.42889	0.387507	4.91809	0	0.42857	0	0	0.243185
RE10|1160939	5255	2	1	0	Low-quality	Genome-fragment	4.68	HMM-based (lower-bound)	Virulent	106.54	30.618	6.37867	57.6417	9.37341	78.7555	66.2477	111.258	51.8148	31.5737	151.392	36.3677	135.269	18.8935	0.867094	52.9909	19.9998	24.8928	43.258	12.9549	3.32382	27.71	72.8946	22.7707	156.911	48.0292	21.3835	112.832	40.2848	95.6177	11.6811	56.2051	59.7176	36.9307	68.0431	62.8299
RE12|975973	22983	49	6	0	Low-quality	Genome-fragment	21.1	HMM-based (lower-bound)	Virulent	0.246061	0.913138	0.583387	0	0.13395	0	0	0	0	0	0	0	0	0	43.8482	0	0	0	0	0	0.217138	0	0	0	0.815394	0	0.698469	0	0	0	2.3741	0	0	0	0	0.161415
RE6|2025626	5096	5	1	0	Low-quality	Genome-fragment	9.76	HMM-based (lower-bound)	Virulent	0	0	0	0	0	0	0	0	0	0	0	0	0	0	0	0	0	0	0	0	57.0438	1.97066	0	1.51492	0	0	0	0	0	0	0	0	0	0	0	0
RF4|337920	11152	10	1	0	Low-quality	Genome-fragment	9.92	HMM-based (lower-bound)	Virulent	3.54972	1.88187	4.80917	0	0	0	0	0	1.03898	0.850174	0	0	0	0	5.58404	0	0.241647	1.56399	0	0	0	1.80102	0	0	0	0	1.43946	0	0	0	348.608	0	0	0	0	0
RD6|742683	24050	32	11	0	Medium-quality	Genome-fragment	65.99	AAI-based (medium-confidence)	Virulent	1.64601	1.1635	0	0	4.22425	1.11021	0	0	360.608	1.18268	0	0	0	0	0.0315771	0.847221	0.448208	0	0	0	11.2571	4.59323	0	0.320998	0	0	0	0.191117	0	0	0.567193	0.147964	0	0	0	0
RE1|331169	8283	26	3	0	Low-quality	Genome-fragment	9.68	HMM-based (lower-bound)	Virulent	1.3655	0	0	13.4089	0	0	0	46.849	0	0	2.208	15.5491	5.25422	0	0	109.467	4.55486	0	0	20.5476	0	0	0	5.12617	14.7062	0	3.87611	113.203	3.26272	1.42736	0.823433	128.456	4.73584	6.20205	0.625634	199.307
RE6|1771279	8283	11	3	0	Low-quality	Genome-fragment	7.07	AAI-based (medium-confidence)	Virulent	0	0	0	0.40633	0.371675	1.61177	8.59697	0	0	2.2893	0	0	1.31355	3.66258	0	0.819979	0	3.68499	1.89271	1.6438	65.6721	2.42484	0	2.79609	0	0	0	0	0	0	2.4703	0	0	0	0	0
RD3|1799920	8754	21	2	0	Low-quality	Genome-fragment	9.15	HMM-based (lower-bound)	Virulent	10.3362	2.39738	258.847	6.53595	1.05503	166.231	7.2306	4.13731	48.3109	2.16613	3.13381	0.474597	0.828587	4.41066	4.94488	1.93965	4.30979	627.112	1.79087	3.11072	34.6323	44.1667	1.84895	6.17319	1.07038	0	7.33512	0	24.6974	0	17.92	0.406503	1.49368	0	2.95986	0
RE3|2055825	31097	54	7	1	Low-quality	Genome-fragment	38.13	HMM-based (lower-bound)	Virulent	3.63714	0.224959	0.215583	0	0	0.429313	4.83421	0.665531	0.931495	6.86001	7.64561	0.534408	0	250.188	0.610533	0.21841	0	164.197	19.1574	0	0.240721	0.16147	9.19533	0	1.35593	4.68944	0	0	0.144843	17.2988	14.9144	0.114433	0.42048	0.183553	12.8316	0
RE9|1778082	5299	3	1	2	Low-quality	Genome-fragment	1.87	HMM-based (lower-bound)	Virulent	462.107	326.081	198.627	153.705	106.899	273.356	273.242	289.994	317.054	307.748	521.159	235.995	177.948	214.43	13.4717	156.371	144.939	245.216	473.366	176.651	49.2078	200.887	423.554	211.976	322.71	335.53	192.368	193.431	275.402	365.908	172.475	171.916	303.511	220.821	293.383	200.226
RD2|345772	10387	3	0	0	Low-quality	Genome-fragment	13	AAI-based (medium-confidence)	Virulent	3.81116	13.4698	21.9443	0.648047	656.499	2.57058	3.04692	0.996246	3.34649	11.4099	0	48.3979	13.2681	27.3482	32.1699	0	240.505	5.87711	5.28262	0.327708	51.7689	34.8059	0	19.6958	1.8042	0.539977	8.50015	0	24.7173	0	10.5062	0	0.629424	7.69341	0.99781	1.07147
RD7|3544	7338	9	3	0	Low-quality	Genome-fragment	9.89	HMM-based (lower-bound)	Virulent	0	0	0	0	0	0	0	0	0	189.933	0	0	0	4.88593	10.8667	0	0	0	0	0	2.21028	0	0	0	0	0	0	0	0	0.805591	17.66	0	0	0	0	0
RE12|1682496	7006	7	1	0	Low-quality	Genome-fragment	7.15	AAI-based (medium-confidence)	Virulent	4.84317	0	18.1809	0.960786	10.9855	0	0	0	0	4.05987	2.61046	3.55805	11.9062	11.8095	42.3832	0.969439	5.76974	0	2.2377	1.94342	6.58891	8.60047	3.08035	2.20383	0	0	1.14565	0	0	0	3.89409	1.01585	0	1.62945	4.43802	0
RE5|41541	7311	11	4	0	Low-quality	Genome-fragment	19.01	AAI-based (medium-confidence)	Virulent	0	0	0	3.68281	0	0	0	2.8308	1.58483	0	7.50467	2.27308	144.355	0.754458	0.20775	22.2959	0	3.57849	6.43303	198.34	2.21844	0	2.95184	29.0385	0	0	0	2.51477	0	6.46852	1.86582	2.92042	0	0	2.83525	0
RE6|2209641	5182	3	0	0	Low-quality	Genome-fragment	5.73	AAI-based (medium-confidence)	Virulent	0	0	0	0	71.2909	0	0	0	0	0	0	0	0	0	0	0	36.9229	0	0	0	49.115	0	0	0	0	0	0	0	0	0	0	0	0	0	0	0
RE6|180299	15919	24	3	0	Low-quality	Genome-fragment	29.12	AAI-based (medium-confidence)	Virulent	20.2492	1.31834	9.26488	0.422845	9.08935	4.61253	0.994042	0.325021	65.1428	5.95587	2.29774	1.04394	2.05041	4.15793	9.11182	0.639979	22.3456	78.8865	1.47723	4.70419	229.633	254.232	16.9459	5.33451	10.595	0	12.6051	0	16.6937	1.85672	32.9906	2.01186	5.74971	1.07569	6.83615	0.932167
RE11|2109236	9296	17	4	1	Low-quality	Genome-fragment	12.04	HMM-based (lower-bound)	Virulent	125.928	87.2939	58.4147	38.3775	30.7991	82.5779	99.5819	74.0256	77.2778	73.944	123.946	38.4356	44.8659	59.039	7.43417	34.7047	40.5851	61.9161	105.404	43.5741	20.5342	50.234	111.433	49.828	107.853	78.4356	75.1185	58.3446	70.2567	125.91	61.6309	39.8114	110.417	76.7529	100.342	54.274
RF5|1586581	7116	9	1	0	Low-quality	Genome-fragment	6.91	HMM-based (lower-bound)	Virulent	39.7359	18.6784	1.8842	40.6751	22.9293	43.1503	5.55936	109.064	37.4499	1.99855	8.99538	64.8064	55.5527	10.8519	0.426886	136.964	37.8703	14.0935	14.3202	28.2224	5.96108	23.2857	7.58183	23.3249	108.633	31.5275	27.0707	192.484	96.8437	26.5831	32.5881	151.022	78.0938	24.0639	2.91294	204.362
RF5|283416	11600	15	2	0	Low-quality	Genome-fragment	6.81	HMM-based (lower-bound)	Virulent	0.487518	0	0	14.2169	0	0	0.682076	110.171	1.49828	0	0	21.4894	2.18854	0	0	104.513	0.232315	0	0.675746	40.2013	0	0	0.930212	4.32587	0.403883	0	0	32.8878	1.16487	0	0	148.17	0	0	0	39.6564
RE10|2232015	8172	14	1	0	Low-quality	Genome-fragment	10.81	HMM-based (lower-bound)	Virulent	0	1.71208	1.64072	21.0043	8.66463	0	0	5.0651	12.0517	0	0	0	251.634	0	1.02224	7.06449	0	14.4066	15.3473	73.3098	21.2211	6.14444	0	59.5155	0	2.74535	0	0	0	0	0	0	0	0	0	0
RE9|730726	5673	6	3	0	Low-quality	Genome-fragment	2.95	HMM-based (lower-bound)	Virulent	48.8464	16.0307	0	25.5107	77.0595	35.2997	20.9204	10.0324	97.0152	10.0277	25.7908	10.9852	52.4222	8.75067	1.33867	11.9723	14.2509	146.807	42.8342	133.804	33.6481	15.932	2.85311	100.702	2.47755	4.94337	2.8297	4.86131	3.17587	3.12608	1.20227	0.627275	5.76223	4.02465	3.65389	6.53938
RE2|466608	6465	10	1	1	Low-quality	Genome-fragment	15.38	HMM-based (lower-bound)	Virulent	65.6057	27.0516	38.3677	31.2356	60.4764	20.6502	34.2673	40.0155	173.845	13.1988	0	61.0501	86.3906	1.70637	0.117468	79.8427	117.965	15.5126	9.6998	2.63257	20.2629	38.834	0	94.9328	106.528	12.1458	42.2118	44.7906	87.0878	1.82875	31.6496	3.30258	167.87	46.7938	0	132.554
RE10|1644174	5141	7	1	0	Low-quality	Genome-fragment	0.42	HMM-based (lower-bound)	Virulent	8.80018	2.72147	0	14.4026	11.9766	7.79051	7.69508	6.03852	4.50756	2.76633	1.77873	5.65694	50.087	4.29165	0.443161	1.32112	2.62094	31.382	9.1484	184.729	5.09628	0	0	55.5613	0	0	0	0	0	1.14986	0	0	0	0	2.016	0
RE12|1002803	9189	8	1	2	Low-quality	Genome-fragment	6.57	HMM-based (lower-bound)	Temperate	0	0	0	0	15.4113	0	1.72208	0	0	0.515896	0	0	0.394681	3.30146	47.4385	0	5.57212	0.949047	0	0	5.29515	0	0	0	1.01971	0	0	0	0	0	0	0	0	0	0	0
RF1|723836	13424	20	5	0	Low-quality	Genome-fragment	27.19	AAI-based (medium-confidence)	Virulent	36.651	7.81684	9.98806	24.821	5.50402	11.4369	21.2183	67.4501	3.88409	5.65026	19.0736	62.2079	5.94368	16.6412	0.67887	14.6726	21.4801	5.84678	23.3571	1.01428	1.76585	20.5727	26.526	9.20144	114.823	66.4326	53.8126	291.724	129.851	110.091	133.626	124.591	43.3453	69.3085	42.4638	98.3824
RE6|165154	12128	12	1	3	Low-quality	Genome-fragment	8.59	HMM-based (lower-bound)	Virulent	16.7866	13.2666	36.4828	3.88513	38.5838	0	3.26191	0	23.4065	6.25405	1.50799	16.4431	14.0547	40.9322	29.8061	0.560017	3.55521	13.6622	0	0	67.6891	8.28041	0	35.3282	0.7726	0	0	0	0	0	0	0	0	0	0	0
RE6|1209433	5132	7	1	1	Low-quality	Genome-fragment	0.63	HMM-based (lower-bound)	Temperate	5.50976	16.3575	18.2883	9.18138	28.7942	2.60139	9.25029	1.00818	39.5103	1.84746	10.6911	31.5725	33.921	13.9723	29.2999	0	6.8264	17.8426	10.6918	9.2858	57.6161	26.4173	0	39.1115	0	1.0929	6.25601	0	0	0	0	0	1.27393	0	0	1.44575
RF5|1977117	6209	4	1	0	Low-quality	Genome-fragment	3.46	HMM-based (lower-bound)	Virulent	40.9864	2.25336	1.07972	21.6823	17.3539	19.3514	6.37146	61.6647	31.7239	21.378	10.3094	38.8094	18.6914	15.9905	0.122311	47.5837	21.2671	6.32043	1.26247	32.8933	2.81312	8.08703	11.2962	14.2986	66.4011	23.4865	18.098	70.3262	65.2885	35.2267	12.0833	92.8461	60.0187	31.2563	18.3615	65.7235
RE6|2009355	15203	18	7	0	Low-quality	Genome-fragment	16.41	AAI-based (medium-confidence)	Virulent	0.74396	0	0	0.442759	0.809993	0	0	0	0	0	0	0	0.477106	0	0	1.78699	0.354516	20.0768	0	8.95589	65.2409	7.26615	0.709758	1.52339	0	0	0	0	0	0	0	0	0	0	0	0
RE12|1624469	7562	9	8	0	Low-quality	Genome-fragment	10.47	HMM-based (lower-bound)	Virulent	0	0	2.65961	0	0	0	0	0	0	0	0	0	0.959197	0.364708	38.7648	0	10.3347	0	2.07317	0	0.164985	0.664009	0	0	1.2391	0	0	0	4.16943	0	5.41166	0	1.72913	0	0	1.47175
RE3|554545	6212	13	0	0	Low-quality	Genome-fragment	12.02	AAI-based (medium-confidence)	Virulent	33.6837	123.875	113.316	23.839	31.2219	116.052	80.2416	29.9846	83.9344	58.7611	117.765	36.7843	34.4457	37.7372	3.54531	11.4802	52.0577	77.9143	107.258	8.21935	6.22604	84.8729	92.9313	42.8751	54.3019	100.221	165.387	19.9778	116.012	53.2904	83.4445	8.59271	69.4618	92.8049	77.5817	28.0683
RD5|1884592	27103	38	1	2	Low-quality	Genome-fragment	43.22	HMM-based (lower-bound)	Virulent	22.3262	7.48519	34.382	119.088	4.99788	0.985155	4.96275	398.22	8.1226	6.29674	4.04875	202.956	33.8546	2.64568	1.03674	469.49	1.59088	1.93059	9.54416	254.072	1.65717	18.7118	4.9766	121.342	22.8176	3.9319	78.4788	143.303	2.659	6.54329	6.29127	444.307	7.96031	9.47711	3.44162	168.907
RE6|1113685	6284	8	3	0	Low-quality	Genome-fragment	16.47	AAI-based (medium-confidence)	Virulent	6.29957	31.1705	0	0	11.7578	1.06225	7.5545	4.94017	3.68768	2.26316	0	0	2.30854	0	0.725108	0	4.71728	5.55111	0	0	57.5763	0.799052	2.5757	0	0	1.78509	2.55457	0	0	0	0	0	2.08079	0	0	0
RE5|350952	10426	25	3	0	Low-quality	Genome-fragment	20.17	HMM-based (lower-bound)	Virulent	162.182	10.0646	5.14405	10.9756	17.4215	26.2499	49.3272	22.3317	48.3427	10.4578	9.64789	10.3606	114.444	8.99379	18.5013	6.51437	16.2839	42.6588	31.5771	142.999	22.8559	56.8297	12.4195	105.885	26.9617	12.911	71.5961	7.0537	10.3683	5.66989	22.8963	37.2031	30.0993	7.66463	12.923	22.7725
RE12|490677	47754	66	19	0	High-quality	High-quality	100	AAI-based (medium-confidence)	Virulent	29.0138	5.42018	94.1989	2.88962	57.5695	23.0641	14.9116	9.64288	149.826	11.7139	4.40429	9.83105	12.9868	37.2505	2128.63	2.20451	847.664	433.446	6.40171	15.5391	53.0618	19.5575	39.8818	31.0391	22.3686	1.29196	18.1526	1.15501	16.9777	18.8159	95.9788	3.20427	12.3216	4.18349	33.7488	3.57353
RD2|1823168	66051	91	25	0	High-quality	High-quality	100	AAI-based (high-confidence)	Virulent	9.84617	370.372	87.8965	5.50315	178.28	32.3394	13.7756	0.861668	24.4711	2.512	8.30671	42.0173	1.15307	38.9986	7.02505	0.51414	14.4022	18.6164	1.06808	0.206138	5.51551	17.9409	32.9181	0.350639	2.83723	8.91611	7.04811	1.183	15.2751	12.0822	19.6196	0.754257	11.6798	48.2209	8.86558	0.786318
RE12|1492744	7664	15	1	1	Low-quality	Genome-fragment	5.35	AAI-based (medium-confidence)	Virulent	0	0.912781	12.2463	0	2.41016	0.870977	0	0	1.51183	0	0	0	0.473215	0	39.6362	0	0.351625	0	0	0	0.976737	4.58621	0	0	1.22261	0	0	0	0	0	0	0	0	0	0	0
RF9|332012	34008	50	17	1	Low-quality	Genome-fragment	36.15	HMM-based (lower-bound)	Virulent	2.49436	1.23422	0	21.1787	2.80628	0.392564	0	28.2982	1.02211	0.418187	0	19.7909	4.37237	0.973155	0	32.0542	4.83374	0	0.691483	97.8894	0.330174	0.590595	0.158646	52.3248	65.0242	2.30894	3.30423	193.137	41.8525	2.60737	0.401111	202.37	68.8233	1.00705	1.06666	230.171
RD12|2215916	5350	8	1	0	Low-quality	Genome-fragment	2.34	AAI-based (medium-confidence)	Virulent	39.1108	146.449	315.777	5.66181	43.1577	41.1739	50.2824	3.86841	11.9115	0	6.83697	47.3704	21.6926	0	3.69069	0.634756	3.52597	0	0	0	0	36.6034	21.1775	2.16449	11.3842	10.4836	30.0054	6.01394	12.6285	2.20988	104.538	2.66058	3.66607	42.6763	34.8704	0
RF2|24678	11449	23	1	0	Low-quality	Genome-fragment	6.85	HMM-based (lower-bound)	Virulent	104.717	103.262	49.7719	5.58538	25.545	182.49	54.5947	12.2018	121.443	146.577	147.762	13.7895	32.6275	54.4406	1.45929	2.37292	16.2411	66.6494	49.98	0.29731	10.0254	66.2248	132.418	14.8345	98.2104	139.129	49.0743	9.63515	99.9268	174.518	49.4454	0.932447	142.189	92.2327	88.7149	12.9611
RE5|186932	6363	11	2	1	Low-quality	Genome-fragment	6.36	HMM-based (lower-bound)	Virulent	0	0	0	0	0	0	2.4869	0	0	0	0	0	5.69971	0	0	0	0	0	0	142.833	0.392148	0	0	2.42653	0	0	0	0	0	0	0	1.11851	0	0	0	0
RE6|1232819	6671	13	1	0	Low-quality	Genome-fragment	11.33	AAI-based (medium-confidence)	Virulent	3.39092	0	0	0	0	0	0	0	0	0	0	0	2.17462	0	0	0	0	0	0	1.02051	59.6598	25.5917	1.61752	0	0	0	0	0	0	0	0	0	0	0	0	0
RD7|1507149	11068	23	2	0	Low-quality	Genome-fragment	11.03	HMM-based (lower-bound)	Temperate	1.0219	15.8013	15.1427	0	20.5832	0	0	0	0	301.961	1.65241	0.750744	4.25979	29.9016	286.399	0	19.235	0.787928	0	0.307545	15.2176	0	0	0.697507	0	0	0	0	0	0	5.54612	0	0	10.3143	0	0
RD11|1703609	6088	8	0	5	Low-quality	Genome-fragment	1.95	AAI-based (medium-confidence)	Virulent	306.541	604.412	728.981	80.1604	103.664	398.01	820.06	148.727	400.624	321.593	656.393	133.756	111.995	115.517	75.8432	82.5558	99.5962	305.829	648.929	77.7173	39.3467	409.089	421.834	88.7649	176.228	358.377	619.651	83.8037	254.507	309.748	571.362	54.3599	347.94	342.215	325.16	101.763
RE3|555574	6303	6	0	5	Low-quality	Genome-fragment	3.23	AAI-based (medium-confidence)	Virulent	218.026	198.668	199.96	90.2415	40.5398	159.916	208.378	130.52	155.335	198.558	303.219	79.0979	86.8849	100.201	14.6994	101.83	64.1326	202.005	274.844	86.4073	20.3879	121.09	242.242	79.0006	152.377	180.64	240.679	75.1112	111.479	185.699	143.92	94.2844	188.781	164.818	173.477	72.3948
RE3|2111811	5944	4	1	0	Low-quality	Genome-fragment	3.08	AAI-based (high-confidence)	Virulent	1.90283	0	2.25572	0	0	2.24602	10.6488	0	0	0	3.07687	4.19376	52.4728	0.927968	0	9.14117	0	170.924	43.5187	76.1642	1.46927	15.2056	1.81535	64.9395	4.72919	0	0	0	0	9.94519	0	0	0	0	0	0
RE12|1683196	12629	20	8	0	Low-quality	Genome-fragment	25.1	AAI-based (high-confidence)	Virulent	0	16.0639	0	0	5.60673	0	2.506	0	0.917466	0	0	0	0	0	51.5948	0	18.3512	0	17.3792	0	0	1.59038	0	8.25245	0	0	0	0	0	0	0	0	0	0	0	0
RE12|1081801	46970	73	12	0	Medium-quality	Genome-fragment	72.98	HMM-based (lower-bound)	Virulent	0	0.297873	7.42191	0	11.5357	0	0	0	0	0.403711	0	0	0	0.234867	319.277	0	9.69619	0	0	0.14494	0.823423	2.88638	0.229731	0	0	0	1.70885	0	0	0	2.32335	0	0.278383	0	0	0
RE8|329431	12774	25	5	1	Low-quality	Genome-fragment	15.5	HMM-based (lower-bound)	Virulent	7.0834	2.7382	8.92185	0	1.68703	5.74815	19.8205	0.405042	1.8141	8.53555	59.4167	1.30096	2.27132	20.5106	1.12957	0	0.210964	8.19238	52.7731	0.266472	0.293006	8.25474	305.366	0.604353	5.86823	10.9769	13.8235	1.43929	5.99429	15.2714	23.4932	0.557152	5.62988	5.3621	44.6245	1.16167
RE12|866815	6006	9	4	1	Low-quality	Genome-fragment	6.42	HMM-based (lower-bound)	Virulent	1.88319	4.65904	0	0	2.05034	0	0	0	0.964592	1.57861	0	0	0.60385	0	28.9559	0	0.448693	2.90403	0	0	1.66183	3.34415	0	0	0	0	0	0	0.749947	0	0	0	0	0	0	0
RF4|2214778	5115	5	0	0	Low-quality	Genome-fragment	9.05	AAI-based (high-confidence)	Virulent	18.7954	6.83827	7.86391	7.89591	9.62997	3.91505	15.4684	6.06921	7.92832	4.63399	21.4532	13.8081	5.67229	2.15673	2.22707	11.2866	12.6445	6.81978	21.4548	3.99285	0.487827	11.78	10.5479	10.565	20.1507	25.2202	18.8304	71.8885	149.699	27.7369	285.354	29.2196	28.1197	42.4052	28.3675	138.528
RF3|2367401	5206	10	3	0	Low-quality	Genome-fragment	12.35	AAI-based (medium-confidence)	Virulent	1002.64	683.968	508.658	390.481	304.546	616.741	720.385	555.564	580.892	674.753	1259.43	458.875	437.492	504.86	70.8956	320.286	367.527	510.081	1082.59	396.883	185.01	383.875	832.187	444.13	782.041	761.695	601.29	451.161	617.746	1081	581.694	384.152	776.1	719.251	919.763	448.225
RD2|1941074	9327	12	4	0	Low-quality	Genome-fragment	18.09	AAI-based (medium-confidence)	Virulent	3.03164	18.0008	1.43754	0	166.356	2.14705	5.08979	0	1.24227	0	3.92171	28.9536	5.83262	0.591384	2.60553	0.728196	43.0506	0	0	0	1.73893	10.7671	3.47072	2.48312	0	0	0	0	0	0	0	0	0	0	0	0
RF9|532107	14600	20	1	5	Low-quality	Genome-fragment	23.31	HMM-based (lower-bound)	Temperate	95.2865	170.576	123.978	120.333	83.7121	207.57	195.634	212.276	152.373	110.722	186.647	164.193	150.037	36.6463	6.2939	177.008	168.336	117.97	119.19	76.7045	14.5271	116.933	137.098	106.547	255.431	233.186	256.187	254.689	202.38	198.397	220.031	293.213	219.42	244.738	120.68	320.922
RE12|984803	8101	10	5	0	Low-quality	Genome-fragment	16.25	HMM-based (lower-bound)	Virulent	0	0	4.9653	0	0	0	0	1.27737	0.715139	0	0	0	7.6107	0	39.7479	0	3.32657	0	0.967615	0	0	0	0	0.95297	0	0	7.92638	2.26953	1.11201	0	1.68386	4.83197	4.84224	3.523	0	0
RD1|2340819	5620	12	5	0	Low-quality	Genome-fragment	5.21	HMM-based (lower-bound)	Virulent	179.115	60.9932	42.9437	108.994	39.4409	91.4569	70.3922	167.557	90.7142	83.5083	78.102	110.149	56.1432	31.4069	4.45928	97.2859	42.197	58.9662	29.2903	47.8485	21.0896	30.3776	68.1603	52.1994	106.706	48.9019	59.9842	74.4252	36.0655	88.3558	54.6125	50.022	88.4119	72.1112	42.416	58.7493
RE6|256084	5183	13	3	1	Low-quality	Genome-fragment	7.39	AAI-based (medium-confidence)	Virulent	0	0	0	0.64936	1.18795	0	0	0	2.23552	0	0	0	1.39947	0	0	5.89687	1.03988	16.8258	4.53713	5.25396	45.4949	23.251	8.32757	14.1501	0	0	0	0	0	0	0	0	0	0	3.99933	0
RE12|1803320	16974	23	4	0	Low-quality	Genome-fragment	31.6	AAI-based (medium-confidence)	Virulent	0	0	0	0	0	0	0	0	0	0.558569	0	0	0.427327	0	56.3286	0	0	0	0	0	0.44101	0	0.635705	0	0	0	0	0	0	0	13.2601	0	0	0	0	0
RF7|2059963	5035	9	1	3	Low-quality	Genome-fragment	6.57	HMM-based (lower-bound)	Virulent	80.869	56.9648	33.2869	15.3743	7.94867	176.325	139.856	44.1871	131.17	80.0295	132.581	15.6778	35.2948	14.7892	0	19.5596	17.1272	88.3337	57.6028	1.3521	6.69031	11.9672	114.655	6.13308	200.987	177.118	229.555	62.989	135.081	153.803	132.752	17.669	161.011	231.266	58.6656	103.889
RE12|1215162	5920	15	3	0	Low-quality	Genome-fragment	3.37	HMM-based (lower-bound)	Virulent	0	0	2.26486	0	1.04006	0	0	0	0	48.8471	0	2.80717	0	11.6466	34.5079	0	3.64169	0	7.94458	0	1.68597	0	0	0	0	0	0	0	0	0	2.30422	0	0	0	0	0
RE6|1534455	15391	14	8	0	Low-quality	Genome-fragment	22.2	HMM-based (lower-bound)	Virulent	67.9757	13.6357	0	0	0.200025	30.3594	0	0	55.3324	34.8051	5.94142	0.539876	10.8394	9.3179	0	0	0	37.68	1.0186	0	81.5479	1.30498	0	2.50796	0	0.728834	0	0	0	0	0	0	0	0	0	0
RE6|440289	5726	8	1	0	Low-quality	Genome-fragment	2.46	HMM-based (lower-bound)	Virulent	29.6291	7.3303	0	29.9768	20.4307	3.49729	1.38178	1.8072	12.1411	5.79532	0	34.8274	321.756	5.29814	1.45891	19.5715	9.41268	62.4437	27.3791	119.487	88.6798	65.7689	0.942233	400.427	45.0013	10.7747	2.80351	0	6.29295	4.12953	4.76458	0	7.99245	0	2.71505	1.94366
RD2|2047567	9222	13	1	6	Low-quality	Genome-fragment	7.58	HMM-based (lower-bound)	Virulent	125.712	56.8929	13.0852	29.9265	154.897	57.9065	52.3354	11.221	108.052	21.5901	45.6131	20.7235	316.974	7.17741	2.30579	9.20609	2.33776	192.44	101.999	136.939	53.3032	89.84	2.34016	220.165	17.273	12.1638	0	0	0	7.69216	1.47918	1.5435	1.41788	0	4.49545	2.41366
RF11|712882	12532	18	1	0	Low-quality	Genome-fragment	15.35	AAI-based (high-confidence)	Virulent	3.61009	0	0	1.61138	0.98263	4.2612	4.41945	0.825726	2.7737	1.51311	7.29688	0.663042	0.578794	2.64084	0.181798	7.58749	4.30075	2.08765	51.2902	0	0	1.60269	9.90187	5.54421	5.23386	443.078	21.1357	83.6237	6.11004	7.5473	21.7698	2.27164	0	0	25.2242	8.88076
RE12|1196230	58088	92	10	3	Medium-quality	Genome-fragment	85.96	HMM-based (lower-bound)	Virulent	0	0.361291	1.0387	0	4.02789	0	0	0	0	0	0	0	0	0.427305	55.472	0	0.927851	0.150131	0	0	1.09538	0	0.371521	0.199353	0.161309	0	0.276355	0	0	0	0	0	0	0	0	0
RF10|437305	18865	28	5	0	Low-quality	Genome-fragment	18.55	HMM-based (lower-bound)	Virulent	42.268	9.64136	25.231	61.9069	19.746	26.1841	18.4538	48.8191	43.3003	45.9859	4.36258	41.403	83.2426	11.9878	19.0008	59.4043	66.1392	61.4824	19.5291	66.2197	28.9006	59.6214	8.00776	44.81	111.756	42.5153	43.3977	53.602	91.922	30.082	31.4542	26.597	81.4413	38.1236	7.69147	49.5556
RE12|400708	6397	8	4	0	Low-quality	Genome-fragment	13.11	AAI-based (high-confidence)	Virulent	0	0	0	0	0.962508	0	0	0	0	0	0	1.29893	0	0	53.5411	1.06173	60.2413	4.08979	0	1.59633	2.73045	4.70962	0	2.41363	0	0	0	4.31112	2.81643	0	22.3902	0	4.08806	0	1.62017	0
RE12|2001171	7470	16	1	0	Low-quality	Genome-fragment	17.77	HMM-based (lower-bound)	Virulent	0	0	0	0	8.24252	0	0	0	0	0	0	0	0	0	41.1739	0	0	0	0	0	0.501052	0	2.88901	0	0	0	0	0	0	0	0	0	0	0	0	0
RE12|1849312	6798	9	4	0	Low-quality	Genome-fragment	17.2	AAI-based (medium-confidence)	Virulent	0	0	0	0	0	0	0	0	0	0	0	0	0	0.811392	34.8547	0	0	0	126.839	0	0	4.43181	15.873	0	0	0	0	0	0	0	0	0	0	0	0	0
RE10|1001314	36356	36	7	0	Low-quality	Genome-fragment	23.93	HMM-based (lower-bound)	Virulent	11.6663	5.77254	0.553195	3.42525	12.4478	6.97701	1.30577	0.142315	4.78051	1.04314	4.77898	5.7138	155.519	4.62738	1.90087	2.3352	6.30054	41.258	28.6759	7.30292	26.3896	27.7607	2.5228	256.831	5.02577	5.24528	0.441548	0	0	0.812991	0	0.0978801	0.539484	0	0.285077	0
RF11|580508	17948	41	1	1	Low-quality	Genome-fragment	22.13	AAI-based (medium-confidence)	Virulent	2.52071	0	1.49409	0.562564	0.514583	2.2315	8.37584	0	1.61392	1.58477	24.9653	0.925923	0.202068	3.53422	0.211564	6.24393	3.4534	0.485892	59.8337	0	0.139026	1.11906	2.70543	3.44106	1.56621	440	16.0994	32.5239	4.26627	5.59919	30.4011	0	0	0.318028	17.3238	11.1616
RE2|1083670	6832	6	1	0	Low-quality	Genome-fragment	6.18	AAI-based (medium-confidence)	Virulent	18.2106	86.0109	47.1006	38.9176	52.7216	88.911	33.5847	12.1171	73.7735	31.9184	10.7078	27.365	18.5795	20.1838	5.89136	39.2681	103.739	63.8231	22.9469	10.4628	8.40024	80.1105	1.5794	59.3239	74.0611	84.5581	27.0211	54.4944	110.759	27.6882	47.9191	17.7093	121.532	128.663	5.30955	80.9073
RE1|1916582	5694	7	5	0	Low-quality	Genome-fragment	14.77	AAI-based (medium-confidence)	Virulent	22.8433	19.6573	18.838	23.6434	32.4403	84.4067	6.94774	12.7215	150.582	31.6371	9.63588	21.8895	33.7577	15.4994	1.33374	128.228	24.1372	20.6763	24.7797	0.597806	20.5964	31.7465	1.89506	6.77907	102.028	86.6824	25.3734	26.6386	156.626	45.6801	28.7481	28.7482	72.3363	32.0784	150.167	36.4855
RE6|403454	5155	6	0	0	Low-quality	Genome-fragment	11.78	AAI-based (medium-confidence)	Virulent	4.38814	51.5676	81.9304	5.2231	274.713	1.29489	6.13934	0	20.2289	204.153	5.3217	36.2673	75.9818	293.18	195.934	0	116.576	5.07515	3.04118	2.64125	263.077	9.74052	10.466	8.23667	1.81767	0	10.8992	5.3498	19.2225	4.58694	68.8003	0.690306	2.5365	9.9654	6.03157	3.59824
RE1|1349228	8704	27	3	0	Low-quality	Genome-fragment	9.55	HMM-based (lower-bound)	Virulent	56.5261	2.41115	1.54044	95.1224	11.3183	13.8043	0	30.9109	7.32155	11.9821	1.0506	99.7605	38.7506	0.633713	0	146.31	5.8826	0	199.929	142.351	3.01011	4.61511	0.619856	24.8346	56.5177	1.28877	8.29941	28.5161	6.20981	3.39581	1.56721	114.066	60.8415	9.83678	5.95373	36.6546
RE5|1985674	5335	7	3	0	Low-quality	Genome-fragment	8.25	AAI-based (high-confidence)	Virulent	0	0	5.02642	20.1875	15.5804	2.50241	1.48305	5.81893	5.42956	7.10864	0	0	10.8768	1.0339	0.284697	19.0962	0	17.1637	8.81573	152.49	2.80626	0	2.02258	1.44705	0	0	0	0	0	0	0	0	0	0	5.82807	0
RE12|1940546	6585	13	1	0	Low-quality	Genome-fragment	5.4	HMM-based (lower-bound)	Virulent	1.7176	0	2.03614	0	14.9605	0	0	0	0	1.43981	0	0	0	0.837637	28.4858	0	0	0	0	0	7.57855	0	0	0	0	0	0	0	0	0	4.14305	0	0	0	0	0
RE6|97905	7476	16	4	0	Low-quality	Genome-fragment	9.6	HMM-based (lower-bound)	Virulent	40.8482	14.036	0	0.900383	0	30.3579	0	0	43.3958	20.9255	4.89269	0	10.6725	12.1738	0.101582	0	0	25.0799	1.04851	0	71.9266	0	0	1.03264	0	0	0	0	0	0	0	0	0	0	0	0
RE6|297126	7183	11	0	0	Low-quality	Genome-fragment	17.11	AAI-based (medium-confidence)	Virulent	0	0	0	0	0	0	0	0	0	0	0	0	0	0	0	0	0	0	0	0	85.1083	9.08758	1.50222	0	0	0	0	0	0	0	0	0	0	0	0	0
RF8|785995	46813	56	15	2	Medium-quality	Genome-fragment	72.75	HMM-based (lower-bound)	Virulent	20.1743	262.858	59.7176	107.699	90.1616	6.27405	27.3804	31.8312	71.5304	7.79749	7.03224	167.559	8.7544	22.0337	97.7737	2.46645	101.892	5.5887	6.1955	0.50899	122.968	29.3897	65.2319	7.91576	52.2418	31.7501	136.309	44.0854	296.635	60.992	113.935	7.2215	104.744	112.908	230.474	53.0955
RE12|217550	6060	13	4	0	Low-quality	Genome-fragment	8.39	AAI-based (high-confidence)	Virulent	0	1.15438	0	0	0.508017	0	0	0	0	3.91136	0	0	0.598469	6.37143	38.4727	0	2.66817	1.43907	0	0	1.02939	0	0	0	0.77311	0	2.649	0	0.743264	0	3.37648	0	0	0	0	0
RE5|1721798	8440	10	1	0	Low-quality	Genome-fragment	20.08	HMM-based (lower-bound)	Virulent	83.7561	17.406	14.2976	55.4293	17.8733	21.3542	99.3697	162.454	39.1256	17.9737	21.6693	44.3028	24.4933	16.3384	0.539879	28.9701	7.02449	32.548	13.0025	189.151	10.791	134.455	3.83547	93.7561	19.4285	14.62	3.80401	17.9716	9.60607	4.20243	12.9298	37.5248	25.5626	47.3409	10.4379	15.8238
RE12|1536251	7348	14	2	0	Low-quality	Genome-fragment	5.81	HMM-based (lower-bound)	Virulent	0	0	0	0	0	0	0	0	1.57685	0	0	0	0	0	31.2123	0	0	3.56048	7.46741	0.463243	0	0	0	0	0	0	0	2.50211	0	0	0	0	0	0	0	0
RE3|222132	11773	17	5	0	Low-quality	Genome-fragment	20.92	HMM-based (lower-bound)	Virulent	0	0	0	0	0	0	0	0	0	0	0	0	0	0	0	0.576904	0	210.001	0.665816	0	0.847783	0	0	0	0	0	0	0	0	0	0	0	0	0	0	0
RE12|990095	11803	14	3	0	Low-quality	Genome-fragment	11.34	AAI-based (medium-confidence)	Virulent	0	2.37077	3.40794	0	4.17329	0	0	0	0	0	0	0	0	0	68.5243	0	3.65311	0	0	0	4.01673	0	0	0	0	0	0	0	0	0	0	0	0	0	0	0
RE8|848657	11129	6	2	0	Low-quality	Genome-fragment	20.26	HMM-based (lower-bound)	Virulent	27.9483	0	0	0	0	0	0	0	0	0	0	2.98652	0	0	0	0	0	0	0	0	0	0.90237	325.779	0	0	0	0	0.826017	0	0	3.67715	0	0	0	1.86257	0
RF7|605170	14980	18	3	1	Low-quality	Genome-fragment	14.59	AAI-based (high-confidence)	Virulent	152.895	88.7286	53.7035	123.796	163.383	176.014	117.783	115.707	77.7344	140.825	244.788	97.3479	51.8103	87.819	10.4434	86.3721	82.9323	97.5122	173.204	76.1221	22.154	64.0225	282.007	77.8185	112.904	163.994	54.117	140.837	157.857	200.468	130.673	68.6525	139.223	104.024	182.654	81.7244
RE12|709771	5457	12	2	0	Low-quality	Genome-fragment	4.12	HMM-based (lower-bound)	Virulent	5.18161	0	1.22851	0	2.82076	0	2.89979	0	12.7396	3.47486	0	0	2.6584	1.51617	319.943	0	7.90134	17.579	1.43644	0	17.147	349.656	21.751	6.36614	0.858539	0	5.88342	0	29.7142	0	12.4986	0	2.39613	0	4.74815	2.03947
RE12|1299998	20936	26	1	0	Low-quality	Genome-fragment	7.99	HMM-based (lower-bound)	Virulent	0	2.00484	0.640427	0	0	0	0	0	0	0.226432	0	0	0	0.790386	48.7883	0	0	0	0	0	0.238368	0.479675	0	0	0	0	0	0	0.430281	0	0	0	0.624554	0	0	0
RE12|1886869	9396	13	3	0	Low-quality	Genome-fragment	26.17	AAI-based (medium-confidence)	Virulent	0	0	0	0	0	0	0	0	0	0	0	0	0	0	41.059	0	0	0	0	0	0.796691	0	0	0	0	0	0	0	0	0	0	0	0	0	0	0
RE11|1832127	7356	9	5	1	Low-quality	Genome-fragment	3.31	HMM-based (lower-bound)	Virulent	0	1.902	0	0	0	0	0	0	0	3.8667	0	0	1.97212	166.84	0	0	0	0	0	0	0	0	0	0	0	0	0	0	0	0	0	0	0	0	0	0
RF12|1922273	5535	14	5	0	Low-quality	Genome-fragment	10.2	AAI-based (high-confidence)	Virulent	95.0198	130.179	106.585	21.2822	46.1648	126.629	61.4669	24.3043	59.6604	42.8236	193.297	22.5183	47.8321	27.9031	6.58584	18.4062	74.9787	47.2672	60.8965	7.37975	9.24162	87.0893	105.273	9.06596	126.966	234.078	390.084	66.4335	195.303	123.889	250.146	11.5725	131.111	156.75	116.095	86.4612
RD2|526437	5421	8	2	0	Low-quality	Genome-fragment	14.47	AAI-based (high-confidence)	Virulent	11.4753	7.74272	18.55	27.9383	147.654	2.46271	39.4072	1.90887	12.8242	0	0	76.6393	42.8169	3.05249	0.420271	1.25288	41.7575	8.04353	5.78391	6.90703	4.83305	0	25.8764	14.953	0.86424	2.06927	5.92249	8.47882	4.98526	15.2665	3.77448	8.53364	15.6782	3.1588	0.955935	4.79036
RE12|738822	7255	10	1	0	Low-quality	Genome-fragment	3.12	HMM-based (lower-bound)	Virulent	0	1.92848	0	0.92781	0	0	2.18114	0	0	0	0	0	0	1.9007	56.4207	0	2.22868	0	0	0	1.0318	1.38421	2.97463	0	0	0	0	0	0	0	1.88022	0	0	0	0	0.511343
RE12|1164579	17736	15	6	2	Low-quality	Genome-fragment	24.71	AAI-based (medium-confidence)	Virulent	0	0	0	0	7.29028	0	0	0	0	0	0	0	0	4.50946	51.7676	0	4.10245	0	0	0	1.68825	0	0	0	0	0	0	0	0	0	0	0	0	2.57463	0	0.836669
RF5|626876	6806	6	1	0	Low-quality	Genome-fragment	3.8	HMM-based (lower-bound)	Virulent	173.661	27.752	34.4754	91.9788	11.7607	107.885	44.1756	104.149	75.7578	123.286	96.7382	86.0713	63.9446	40.5219	2.56639	99.2937	41.575	42.2842	156.635	106.528	12.0986	52.3814	147.445	63.5205	164.52	140.095	79.0145	183.017	107.211	121.598	85.181	199.207	155.617	116.575	162.941	125.913
RD5|422555	15938	24	8	1	Low-quality	Genome-fragment	31.62	AAI-based (medium-confidence)	Virulent	305.15	116.753	98.8478	145.707	55.0505	112.244	69.5	289.573	166.479	90.1238	153.192	138.678	76.0024	78.5604	6.8138	152.56	83.5272	53.6226	44.2639	108.281	30.7638	88.2135	77.8581	70.2348	176.373	98.5349	118.347	172.458	90.1514	114.608	77.457	100.919	172.286	105.292	49.7469	135.003
RE12|1451319	11908	15	5	0	Low-quality	Genome-fragment	36.61	AAI-based (medium-confidence)	Virulent	149.121	20.5613	5.06683	9.60963	20.1654	33.6337	49.8326	21.7249	47.6778	5.9715	12.2868	11.1646	94.1096	8.80089	23.4691	7.41472	16.0677	41.3776	35.5464	100.334	20.5352	50.6003	7.70229	88.8177	23.6062	11.7752	61.3375	11.5797	5.67372	8.43922	12.6008	34.366	20.8631	10.0661	20.8886	22.1192
RE6|122468	5274	5	0	2	Low-quality	Genome-fragment	5.54	AAI-based (medium-confidence)	Virulent	0	2.65284	15.2537	0	17.5118	0	0	0	5.49236	14.3817	0	1.57551	0	16.7337	43.0545	0	6.13163	0.826772	0	0	95.0972	0	0	0	0	0	0	0	0	0	5.17292	0	0	0	0	0
RF5|123250	6290	8	1	2	Low-quality	Genome-fragment	3.51	HMM-based (lower-bound)	Virulent	48.5503	32.2529	38.3694	108.621	14.6832	49.878	7.5473	105.29	24.8681	15.0734	8.72284	124.837	54.199	10.0846	2.53546	228.916	86.9721	18.0239	6.23104	66.0217	5.95049	44.7042	12.0085	59.5263	74.4841	25.8591	62.5272	162.956	50.126	16.9166	19.5181	140.304	66.5216	65.3375	5.76707	203.478
RD2|1936606	8183	12	2	0	Low-quality	Genome-fragment	10.92	HMM-based (lower-bound)	Virulent	0	0	0	0	179.832	0	1.93379	0	13.4515	2.31728	2.23499	3.04628	3.54562	1.34812	23.1086	0	63.5594	0	0	0	93.3084	0	0	3.30197	0	0	0	2.24679	8.8069	0	3.33398	0	0	1.39508	0	1.81341
RE12|71364	5494	8	1	0	Low-quality	Genome-fragment	4.75	AAI-based (medium-confidence)	Virulent	0	0	0	0	6.16389	0	0	0	0	12.0801	3.32888	0	0	0	29.581	0	6.86711	0	0	0	12.2627	0	0	0	0	0	0	0	0	0	12.4144	0	0	0	0	0
RE9|1123692	6453	6	6	0	Low-quality	Genome-fragment	11.79	AAI-based (medium-confidence)	Virulent	7.01096	4.33631	0	14.0821	23.8539	6.20657	24.5222	9.62157	14.3644	4.40778	11.3367	10.3012	74.7488	4.70124	0.235373	7.36761	1.67045	49.3273	12.1473	85.9812	19.7206	20.2312	3.34432	189.621	15.2466	0	0	0	0	5.49644	0	0	0	0	0	0
RD9|1294520	8866	13	4	1	Low-quality	Genome-fragment	16.62	HMM-based (lower-bound)	Virulent	8.2921	8.67934	12.0983	31.8873	11.4587	20.3282	6.24685	48.437	15.029	10.6938	2.06281	55.2949	30.2704	4.04387	1.88444	86.9478	32.523	4.91811	2.65237	24.9553	3.79943	22.6539	3.65118	26.1223	28.0067	18.3458	52.5078	73.0981	26.4175	4.66726	12.3086	47.7628	43.5069	23.1769	2.33798	83.2673
RF5|904523	5050	7	3	0	Low-quality	Genome-fragment	9.18	HMM-based (lower-bound)	Virulent	96.3066	47.0988	21.2403	307.239	18.8982	23.7927	9.40049	30.7366	52.771	7.50982	1.81078	164.539	61.762	2.73061	21.0535	43.0377	12.8072	12.0882	4.65662	18.8732	12.3527	10.9374	59.8283	9.17229	106.689	32.2086	20.6622	20.0238	42.812	19.8998	22.9601	45.0982	42.7224	46.3418	12.314	42.6075
RE6|1442465	16657	24	11	0	Low-quality	Genome-fragment	40.33	AAI-based (high-confidence)	Virulent	1.35804	5.87967	11.6717	0.40411	22.7331	3.60668	8.07501	3.41682	4.17363	3.98439	2.19594	3.24248	7.62054	1.159	0.182369	0	6.4714	1.83243	1.41178	4.90447	78.1962	7.53623	0.647803	6.95204	0.562532	0.33672	1.92747	0	1.08163	1.41956	0.818934	0	0.784995	0	0.622216	1.55902
RF1|1023944	5406	15	1	0	Low-quality	Genome-fragment	12.47	AAI-based (high-confidence)	Virulent	71.1347	5.17614	2.4802	87.7829	9.1116	2.46954	4.39072	146.434	23.5763	7.01528	10.1492	76.0835	65.7453	5.10159	0.280958	132.546	16.9488	3.22634	5.79996	117.116	7.38509	4.64414	1.99601	32.845	124.796	10.375	10.3931	155.593	47.4914	13.1219	20.1864	105.321	83.4462	13.7261	9.58588	157.148
RE12|1525550	8973	10	5	0	Low-quality	Genome-fragment	9.66	AAI-based (high-confidence)	Virulent	1.2605	0	0	0	0	0	0	0	0	0	0	0	0	0	43.4177	0	0	0	3.49433	0	0	0	0	0	0	0	0	0	0	0	0	0	0	0	0	0
RE10|274734	5597	9	1	0	Low-quality	Genome-fragment	13.09	AAI-based (high-confidence)	Virulent	16.1664	7.49925	2.39556	0	7.15054	0	0	0	28.9822	0	19.6057	0	223.552	0	1.35685	0	5.77778	3.11624	2.80102	0	12.4829	3.58852	0	114.483	0	0	0	0	1.6095	0	0	0	0	0	0	0
RE6|34428	9787	7	0	5	Low-quality	Genome-fragment	4.28	AAI-based (medium-confidence)	Virulent	106.321	130.805	87.6786	88.7231	100.659	74.3428	96.2029	80.8851	129.043	66.3593	56.0608	101.881	84.4889	67.9124	14.7432	44.0671	66.9101	84.205	77.6897	107.47	57.4922	96.9668	37.486	123.053	20.5841	25.7887	21.323	20.1945	46.0221	38.6565	23.6944	25.4518	23.3804	29.1609	27.004	24.2594
RF2|404412	9054	17	3	0	Low-quality	Genome-fragment	11.01	HMM-based (lower-bound)	Virulent	0	0	0	1.48692	2.72019	0	1.74775	0	0	0	4.03996	0	0.801132	0.609216	0.671022	0	5.05992	0	5.1946	0	0.275595	0	2.38358	6.39497	26.9077	35.3102	139.182	53.8121	175.113	68.5553	105.464	7.07461	27.4395	30.8913	149.958	115.137
RE10|831750	11277	15	5	2	Low-quality	Genome-fragment	13.48	HMM-based (lower-bound)	Virulent	221.655	159.427	73.7159	60.2871	50.7773	110.099	108.75	136.267	137.166	156.8	218.941	91.367	98.4107	107.607	11.179	71.9722	63.8047	94.3457	191.848	86.9314	32.0838	84.6001	154.054	86.2571	167.012	163.135	101.781	88.039	113.833	190.285	101.004	89.9336	166.968	113.886	170.945	88.1639
RE2|566763	6446	9	1	0	Low-quality	Genome-fragment	4.12	HMM-based (lower-bound)	Virulent	0	0	0	0	35.8197	0	0	0	0	0.735429	0	0	7.87684	41.0736	118.992	0	89.048	0.67645	1.21605	0	11.0323	0	0	0	2.18044	0	0	0	0.698756	0	21.1619	0	0	0	0	2.30207
RD1|1666650	8012	10	0	0	Low-quality	Genome-fragment	16.91	AAI-based (medium-confidence)	Virulent	0	0	0	214.238	1.53698	0	0	1.29156	1.44617	0	0	0	0	0	0	9.32486	1.00906	0	0	0	0.778594	0	0	0	5.84754	0	0	11.4737	3.37308	0	0	5.3298	9.79205	12.1112	2.58718	0.926059
RE7|683234	7980	10	5	0	Low-quality	Genome-fragment	21.89	AAI-based (medium-confidence)	Virulent	0	0	0	26.149	3.85787	0	7.93191	0	0	0	1.14592	0	0	0	0	1.27667	0	3.27849	1.96457	0.426555	2.50149	239.736	1.35219	0.48371	0	0	0	0	0	0	0	1.78372	0	0	0	0
RE1|1144494	14953	25	8	0	Low-quality	Genome-fragment	9.58	HMM-based (lower-bound)	Virulent	23.4484	20.5848	0.896674	95.4342	3.08826	3.12487	1.05826	131.141	12.7854	0.951095	0.611546	90.5775	18.9182	1.84439	0.0507878	164.199	9.37152	4.3741	4.19375	44.6175	0.83436	0.671603	2.8865	49.3052	20.3657	1.87546	4.83101	157.69	1.20489	0	0.912257	86.863	20.1124	7.25281	0	117.846
RE12|1817972	5754	13	1	0	Low-quality	Genome-fragment	3.21	HMM-based (lower-bound)	Virulent	0	0	0	0	0	0	0	0	0	0	0	0	0	0	54.245	0	0	0	0	0	0	0	0	0	0	0	0	0	0	0	9.48278	0	0	0	0	0
RE9|305317	5937	10	1	0	Low-quality	Genome-fragment	7.82	AAI-based (medium-confidence)	Virulent	11.4304	0	0	16.4398	1.03708	6.746	2.66535	8.71484	7.80642	0	0	2.09935	36.6521	4.64531	0	2.28799	0	27.9089	6.60152	112.948	2.942	0	0	155.388	0	1.88942	0	0	0	0	0	0	0	0	0	1.24972
RE1|611416	8763	12	0	0	Low-quality	Genome-fragment	18.17	AAI-based (medium-confidence)	Virulent	3.22676	1.59661	0	44.5525	0.702632	0	0	121.63	5.28891	1.62293	0	30.8171	12.0022	0.629447	0	161.601	0	0	0	63.7043	0	0	0	18.941	21.9202	0	0	97.5607	2.056	0	0	99.0849	2.98429	0	0	105.413
RD2|1675055	38986	60	23	1	High-quality	High-quality	100	AAI-based (medium-confidence)	Virulent	0.290115	0.897188	14.1006	0.690634	64.5944	0	1.82652	0	2.08041	3.16152	0.234557	2.66417	0.0930263	5.87153	32.0049	0.0871067	36.7046	0.782916	0	0	26.2414	2.96231	0	2.07921	0.240345	0	0.20588	0.235796	4.73686	0.303259	4.89852	0	0.838484	0.14641	0.265845	0.570942
RE12|2086350	9408	18	4	0	Low-quality	Genome-fragment	20.59	AAI-based (medium-confidence)	Virulent	0	1.48715	0	0	0	0	0	0	0	0	0	0	4.24043	0	42.5403	0	0	0	0	0	0	0	0.573472	0	1.99194	4.76934	0	0	0	0	5.79974	0	0.694922	2.42685	4.95739	0
RD1|669325	8157	7	0	6	Low-quality	Genome-fragment	19.41	AAI-based (high-confidence)	Virulent	655.164	584.892	475.862	332.974	168.705	429.626	542.216	417.371	534.803	443.43	763.438	306.618	310.786	302.604	44.7819	280.601	216.394	350.671	638.086	265.819	73.1104	461.681	582.714	357.276	441.682	489.57	410.326	342.037	379.904	552.226	412.223	235.141	521.776	410.76	440.262	296.529
RE12|1802979	79580	82	1	31	Medium-quality	Genome-fragment	77.29	HMM-based (lower-bound)	Temperate	4.40592	13.098	8.33997	3.59486	9.86477	6.03936	6.66134	2.73069	5.02313	7.02925	3.79199	6.83909	5.19536	3.88147	198.417	0.341387	8.02563	3.23276	3.05351	1.79648	4.40539	6.12039	1.35593	2.0857	1.41293	1.12767	3.83269	0.231031	2.37717	2.1542	8.31349	0.626029	4.10771	3.44285	2.34426	1.21205
RD2|2099064	5019	7	3	0	Low-quality	Genome-fragment	10.44	AAI-based (medium-confidence)	Virulent	84.5071	91.9917	81.479	28.1643	169.294	46.5493	69.3627	13.4015	78.4912	34.0029	30.9734	67.05	131.513	40.1132	83.9776	13.5323	49.3976	74.7149	53.101	52.8999	137.216	62.0277	9.67464	173.812	21.4696	4.47001	23.9882	6.41056	21.5382	17.6671	42.127	7.09011	13.0262	21.6081	38.2026	14.783
RE11|228780	5326	6	4	0	Low-quality	Genome-fragment	13.96	AAI-based (high-confidence)	Temperate	0	2.62694	3.77618	1.26385	4.62423	6.26659	1.48556	0	0	1.78016	1.71694	0.780064	0	78.709	2.13884	4.46331	4.55382	8.187	35.3225	4.47378	20.8483	18.8556	187.405	1.4495	0	0	0	0	0	0	0	0	0	0	0	0
RE7|2348507	6285	14	2	0	Low-quality	Genome-fragment	3.28	HMM-based (lower-bound)	Virulent	15.2965	2.22611	7.46665	1.60651	95.5168	0	15.1066	4.11615	0.921772	0.754268	1.45496	128.902	17.8884	0.87762	4.22912	0	0.85755	2.77511	0	3.79115	4.96268	171.769	1.71686	11.0549	17.8904	0	3.83124	0	5.73324	0	16.278	3.39716	8.32182	1.81637	0	10.6247
RE1|2309752	23804	50	3	1	Low-quality	Genome-fragment	32.25	HMM-based (lower-bound)	Virulent	92.8915	35.5596	68.1551	152.135	53.0255	69.2643	55.8406	107.158	83.7216	103.757	7.68312	95.8194	141.997	26.3001	41.4745	184.891	141.173	127.126	42.1504	156.153	55.7665	140.065	15.8656	100.7	213.744	112.156	114.982	110.256	201.14	56.3726	69.9126	57.1063	176.052	72.6563	14.8036	120.782
RE1|517051	17749	27	6	4	Low-quality	Genome-fragment	35.98	AAI-based (medium-confidence)	Virulent	11.1518	1.57655	0.755421	56.1286	1.90796	0	0	58.3019	5.54886	0	0	75.1385	7.15169	0	0	204.916	7.13606	0	0	16.8767	0.421754	0	0	21.5303	12.6701	2.52803	9.0444	107.988	1.26885	0	0	82.2016	1.84175	1.28637	0	164.285
RE8|1671800	13267	24	3	1	Low-quality	Genome-fragment	17.14	HMM-based (lower-bound)	Virulent	51.1514	134.986	104.094	19.7874	32.9508	116.225	91.8414	24.5694	59.3875	50.7395	161.977	29.7497	37.9976	39.7047	3.83521	10.2388	54.0311	65.0756	90.9891	12.3153	7.52314	101.053	129.726	33.459	64.9769	96.8118	160.323	22.5193	102.869	85.9957	88.9383	6.43738	95.601	96.8034	74.2145	32.1569
RF5|2004051	5909	4	1	0	Low-quality	Genome-fragment	2.66	HMM-based (lower-bound)	Virulent	0	0	0	2.27831	0	0	0	6.1293	0	0	0	0	0	0	0	0	0	0	0	25.9225	0	0	1.82611	1.30648	3.17147	0.949187	1.35834	35.7815	0	0	0	175.247	2.21284	0	0	33.2745
RE6|2109759	39008	61	23	1	High-quality	High-quality	100	AAI-based (high-confidence)	Virulent	0.289951	1.25535	14.0927	1.03537	68.8987	0	2.23116	0	2.6733	4.49654	0.703275	2.98219	0.278921	6.08032	33.0771	0.0870576	34.8877	0.447128	0	0	28.3375	1.28723	0	1.78118	0.600524	0	0.205764	0.589157	3.69498	0.303088	4.19637	0	0.670409	0	0.265696	0.190207
RF4|2308319	6719	12	3	0	Low-quality	Genome-fragment	16.13	AAI-based (medium-confidence)	Virulent	7.57507	10.4116	9.97765	1.00183	4.12371	67.5564	10.5981	8.47061	2.5867	8.46657	9.52688	20.4052	10.2557	7.38839	2.14752	14.6573	9.6259	5.19172	23.3328	3.54627	4.82781	14.1991	16.8626	1.72347	36.956	34.2251	93.1781	36.9406	186.361	428.466	148.205	89.5061	36.0023	61.1658	23.9092	71.7775
RE1|1692254	61447	104	20	1	High-quality	High-quality	100	AAI-based (medium-confidence)	Virulent	29.4509	23.9078	5.5642	107.574	17.3852	19.4453	1.28763	209.833	41.2955	10.9552	5.95274	119.337	53.71	4.62294	0.210105	334.029	27.7173	10.5733	3.82703	92.5664	6.51758	9.56084	3.95113	63.9492	68.3921	11.5923	9.66618	178.179	22.9435	6.06083	5.99389	157.058	37.984	17.5567	4.04807	173.092
RF2|314307	25415	35	4	0	Low-quality	Genome-fragment	33.48	HMM-based (lower-bound)	Virulent	69.4246	83.6769	25.3229	173.479	35.2495	145.244	7.16025	24.4297	18.4639	2.05179	1.07942	120.478	17.2667	4.44914	31.943	30.8661	21.2068	13.3823	4.31797	8.70565	16.4451	17.1886	10.6143	3.03758	39.4492	45.6821	39.7928	67.8197	96.4105	12.5602	14.2233	40.7449	72.028	78.382	18.351	63.0584
RD2|901359	5308	6	1	1	Low-quality	Genome-fragment	1.85	HMM-based (lower-bound)	Virulent	2.13083	17.133	11.367	0	473.851	0	11.9248	0.974755	2.18287	3.5724	0	21.1331	4.09954	11.9503	13.4488	0	191.401	2.46443	1.47676	0	37.6072	5.67586	0	18.1801	0	0	4.53643	0	28.8512	0	3.85484	0	0	3.22605	0	0
RE12|944507	10997	10	7	0	Low-quality	Genome-fragment	12.66	AAI-based (medium-confidence)	Virulent	0	85.2418	2.43848	0.6121	0.279947	0	0	0	0	0	0	0.377796	0.659584	38.1198	31.1451	0.617613	0	13.4813	111.197	5.88108	5.10529	31.0489	87.3284	4.91407	0	0	0	0	0	0	0	0	0	0	0	0
RE3|1752785	6053	11	1	0	Low-quality	Genome-fragment	12.86	AAI-based (high-confidence)	Temperate	0	0	0	0	0	0	0	0	0	0.783177	0	0	0	0.455629	0	0	1.78084	164.965	0	0	0	0	0	0	0.774004	0	0	0	0	1.95322	0	0	15.1214	0	0	0
RE8|1343852	7094	10	5	0	Low-quality	Genome-fragment	17.47	AAI-based (medium-confidence)	Virulent	74.138	50.2922	42.526	26.5683	21.6985	57.3985	61.3426	45.2196	55.5324	55.4648	91.5218	32.2109	39.3653	39.6543	4.60325	30.6372	23.5524	33.8063	70.718	40.7855	17.7628	38.9298	88.2219	37.0003	56.136	58.5068	26.0232	30.4524	46.3498	72.497	49.0337	29.0943	61.7472	55.5186	69.397	40.7899
RF9|201104	9299	14	2	0	Low-quality	Genome-fragment	14.17	HMM-based (lower-bound)	Temperate	36.4892	26.3302	17.3025	48.8612	24.4989	49.5308	31.4816	102.935	41.1184	28.5484	44.2521	49.5927	57.7218	9.19406	0.735011	96.0461	54.4824	26.259	19.388	32.2125	2.81751	22.679	15.6652	39.0193	101.772	50.0619	53.5155	144.826	46.9841	41.9565	22.7374	134.703	66.0884	38.671	16.1611	113.699
RE9|1570592	7990	16	3	0	Low-quality	Genome-fragment	6.78	AAI-based (medium-confidence)	Virulent	33.266	5.25323	0	21.4828	21.1917	11.6962	3.96099	1.29512	29.003	7.11976	9.15589	7.27968	79.8878	3.45172	0.76038	8.50048	0.674556	39.8384	15.6969	86.4823	17.1762	23.8807	1.3505	128.023	1.75909	0	0	0	1.12745	0	1.70726	0	0	2.85755	0	0
RD10|1984839	9383	13	4	0	Low-quality	Genome-fragment	9.48	HMM-based (lower-bound)	Virulent	314.614	184.152	144.325	88.9563	72.8386	223.383	114.68	185.278	201.899	118.729	283.602	112.909	83.4885	77.009	15.297	100.253	83.0024	126.402	101.085	79.8103	42.1502	148.77	135.7	60.0619	145.799	142.266	120.615	123.445	142.091	116.553	96.6775	53.0954	184.645	180.066	94.9937	130.473
RD1|2532967	8609	21	7	0	Low-quality	Genome-fragment	20.26	AAI-based (medium-confidence)	Virulent	1.31379	0	0	182.962	6.4368	0	16.5429	0	0	0	0	0	0	3.84424	0.0882134	1.18339	0.939082	0.506493	0	0	0.579681	0	8.14705	0.896737	0	0.651498	0	0	0	0	0	0.41335	0	0.663022	0	0
RE6|480049	13447	22	4	0	Low-quality	Genome-fragment	18.86	HMM-based (lower-bound)	Virulent	1.26167	2.60116	13.9594	0.500577	105.771	0.496406	1.17678	0	1.29248	172.743	0.680036	12.6675	24.2734	192.995	55.798	0.252543	62.3261	0.972796	2.33172	1.26568	85.7291	18.2971	0	12.9174	3.13568	0.4171	0.596896	0	13.0634	32.9707	18.7669	0.264634	9.23765	13.1588	0.770748	15.7253
RF5|1654089	8230	8	1	1	Low-quality	Genome-fragment	8.32	HMM-based (lower-bound)	Virulent	54.2845	15.3001	32.5832	90.7862	12.7183	19.4659	30.7639	152.14	42.2358	27.6485	6.66667	44.9284	25.9996	8.04254	0.276827	75.9239	10.4782	10.0665	10.4769	42.6005	2.88029	9.76183	9.83334	30.9551	48.3875	29.3045	45.8376	93.8263	28.459	12.929	12.431	144.849	36.5419	12.484	8.18562	63.5578
RE10|428814	7025	14	1	1	Low-quality	Genome-fragment	15.86	HMM-based (lower-bound)	Virulent	32.2005	7.96646	2.86291	73.7804	8.32641	3.80081	0	24.3049	2.47402	26.3178	6.5085	23.0648	185.853	2.35552	0	24.1704	8.823	0	95.9607	44.0933	3.01915	0	3.84002	13.7367	32.0117	0	1.14256	20.2829	1.92349	6.73187	0	125.625	7.44521	6.50017	9.5897	14.7864
RE6|1077976	8858	25	3	0	Low-quality	Genome-fragment	12.34	HMM-based (lower-bound)	Virulent	75.9732	108.985	67.3577	78.2705	66.0341	58.7788	72.3503	57.8264	81.0989	46.025	54.7139	91.9288	86.3895	48.5703	10.2881	33.7371	30.4228	62.5164	61.0597	99.1429	49.8597	78.2266	33.4994	126.808	28.032	19.6287	16.3102	15.5668	15.7631	24.0247	23.8694	23.7021	23.6183	35.4411	31.0062	23.872
RE6|589412	7442	8	2	0	Low-quality	Genome-fragment	15.73	AAI-based (medium-confidence)	Virulent	12.1585	17.8602	5.40499	9.49722	37.6446	15.2483	11.6948	10.4287	7.00619	1.274	0	11.7236	25.8286	10.7471	1.63274	0.912643	5.79382	16.9916	14.7462	10.0626	57.1672	37.1094	2.89988	29.046	0.629541	3.01464	4.31414	0	4.23667	3.17733	5.49892	2.39084	0	0	0	1.99398
RE12|2136761	6367	7	5	0	Low-quality	Genome-fragment	12.85	AAI-based (medium-confidence)	Virulent	0	0	0	0	1.93409	0	0	0	0	90.8355	0	0	0.569613	13.8611	36.0213	0	0	0	0	0	0.195951	0	0	0	0	0	0	0	0	0	2.14245	0	0	0	0	0
RD7|644046	5574	11	2	0	Low-quality	Genome-fragment	48.78	HMM-based (lower-bound)	Virulent	43.6265	43.9261	74.5689	3.01905	10.4939	38.3217	48.2617	6.49767	28.0625	47.6268	63.9816	2.98143	11.061	25.2339	8.58343	1.82774	27.5577	27.3796	67.5018	0	6.26719	32.43	32.9095	5.54001	34.4612	59.3678	139.678	3.29844	37.9793	65.7532	115.021	3.83049	46.9166	73.7304	42.766	7.32108
RE11|1924705	34573	39	2	1	Low-quality	Genome-fragment	17.37	HMM-based (lower-bound)	Virulent	0	4.04683	0	0	0.712366	0.386149	0	0	0	1.64541	0	0	0.629403	204.932	0	0	0	1.26121	0	0	0	1.45236	0	0	0	0	0	0	0.521121	0	0.394556	0	0.378204	0.660395	0	0
RD7|569878	7675	10	4	1	Low-quality	Genome-fragment	4.69	AAI-based (medium-confidence)	Virulent	0	0	0	0	3.20894	0	0	0	0	237.183	0	0	0.945074	7.5461	17.217	0	0	0	0	0	1.46301	0	0	0	0	0	0	0	0	0	12.4413	0	0	0	0	0
RE5|1721935	14509	17	6	0	Low-quality	Genome-fragment	21.18	AAI-based (medium-confidence)	Virulent	1.55909	1.92861	0	14.3821	0.848737	1.38021	0	0	0	1.30693	0	2.00443	22.7467	3.80167	0	7.02173	0	19.2339	5.94287	104.869	1.80577	2.07647	0.371854	114.93	0	4.63884	0	0	0	0.407431	0	0.490527	0	0	0	0.511378
RE1|657972	5190	9	2	0	Low-quality	Genome-fragment	4.9	HMM-based (lower-bound)	Virulent	51.2129	57.9593	74.9193	32.4242	13.0499	82.3142	56.406	62.8058	60.2775	13.7011	45.8103	42.4267	37.0359	6.3767	5.85302	96.84	44.6546	24.3644	4.53101	26.8902	8.41361	38.6993	9.35589	26.7746	75.8274	78.8899	41.7561	66.4215	46.8643	27.3361	28.9115	38.3965	39.0506	83.5847	10.9833	70.7648
RF2|568256	8153	16	2	0	Low-quality	Genome-fragment	5.3	HMM-based (lower-bound)	Virulent	0	0	0	0	5.28641	0	0	0	0	0	0	0	0	0	0	0	2.31374	0	0	0	1.22421	0	0	0	1.14928	52.9711	24.612	47.3562	359.649	2.90024	84.4928	0	53.7268	203.731	5.72049	12.7406
RE3|978874	14785	27	4	0	Low-quality	Genome-fragment	8.26	HMM-based (lower-bound)	Virulent	0	0.946304	0	0	0	0	0	0	0	0.320634	0	0	0	0	0	0	0	281.944	0	0	0	0	0	0	0	0	0	0	0	0	0	0	0	0.772128	0	0
RF9|1369556	13310	21	4	0	Low-quality	Genome-fragment	27.67	AAI-based (medium-confidence)	Virulent	37.3898	158.727	157.652	111.008	41.865	149.953	105.811	105.735	113.168	43.8084	58.398	69.2957	62.1257	8.90989	2.16817	94.6578	78.7601	89.7632	45.3476	42.1972	9.65475	130.907	26.3478	71.632	81.6627	136.531	247.246	135.025	113.366	39.0838	58.4174	53.4715	118.87	180.116	38.5447	163.889
RE6|1618696	13001	30	3	1	Low-quality	Genome-fragment	8.58	HMM-based (lower-bound)	Virulent	0	2.69039	13.9226	0	17.9965	0	0	0	0	5.46947	0	0.639123	1.11583	3.81837	280.675	0.261206	9.32761	0	1.20585	0	76.2908	2.70354	0.414986	0	0.720721	0	0.617372	0	0	0	22.5584	0	0	0	0	0.570693
RF5|515966	11847	20	2	0	Low-quality	Genome-fragment	18.05	HMM-based (lower-bound)	Temperate	34.8468	23.0292	13.0152	56.2501	14.8121	46.2027	30.0535	109.184	32.2749	28.0105	20.8407	62.072	53.5728	8.84621	1.15386	85.4217	48.4514	32.7573	15.2181	25.2844	4.63368	13.5629	22.315	30.953	112.311	50.1838	45.3931	142	44.8631	46.4052	21.3014	144.179	77.8116	47.6988	21.871	109.6
RE5|420199	6272	4	2	0	Low-quality	Genome-fragment	5.16	HMM-based (lower-bound)	Virulent	68.5262	8.9229	6.41325	12.8787	48.5937	29.7998	35.3218	0.824936	30.4815	4.53499	18.9537	12.5857	104.083	1.75888	2.17948	2.16578	1.71866	79.9498	31.2446	67.8394	20.0908	36.8267	1.72042	91.6997	8.21676	1.7885	0	0	0	0.94251	0	0	0	0	0	1.77445
RE6|1528572	11280	15	6	0	Low-quality	Genome-fragment	10.84	AAI-based (high-confidence)	Virulent	0	0	0	1.19349	1.0917	0	0	0	0	0	0	0	1.28607	0	0	0.602118	0	32.471	0	8.14765	69.6808	3.11602	0	0.684398	0	0	0	0	0	0	0	0	0	0	0	0
RE12|962134	18255	7	1	0	Low-quality	Genome-fragment	25.65	HMM-based (lower-bound)	Virulent	0	0	0	0	6.40844	0	0	0	1.26943	0.519372	0	0	0	3.92802	44.0972	0	1.47623	0	0	0	0.478408	2.20049	0	0.634348	0.769934	0	0	0	1.48042	0	0	0	0	0	0	0.406441
RE12|437709	30798	49	23	0	Medium-quality	Genome-fragment	63.23	AAI-based (medium-confidence)	Virulent	0	0	0.653028	0	0	0	0	0	0	0	0	0	0.235517	0	50.3771	0	0	0	0	0	0	0.815189	1.75181	0	0	0	0	0	0	0	0	0	0	0	0	0
RE2|395438	5360	11	2	0	Low-quality	Genome-fragment	2.57	HMM-based (lower-bound)	Virulent	24.2668	177.499	73.7939	55.2567	62.0311	165.634	66.4261	27.0284	121.055	45.1062	29.0029	51.9327	29.7716	19.5524	9.91792	60.8229	154.351	44.7429	24.8614	16.5115	13.5003	107.732	6.03943	60.4926	77.7928	123.476	59.8989	78.8929	152.94	27.5719	41.9918	30.5396	85.3821	218.308	6.7677	137.733
RD7|2050389	8873	13	1	0	Low-quality	Genome-fragment	19.84	AAI-based (medium-confidence)	Virulent	100.064	94.6091	58.9328	4.55174	26.369	114.35	66.8777	4.08182	52.2334	106.854	278.26	10.7693	20.0281	93.2465	2.3109	1.91364	20.0451	81.0848	178.452	3.83625	7.87407	93.9396	206.129	5.22034	55.4412	158.028	47.9434	4.66216	52.2856	207.196	69.1811	1.60421	62.6299	92.6345	165.865	10.0344
RD2|1168042	10254	21	3	0	Low-quality	Genome-fragment	15.8	HMM-based (lower-bound)	Virulent	0	0	0	0.656453	1125.57	0	4.62966	0	59.3233	0	0	0	0	10.7584	0	0	48.357	3.40191	0	0	1.46006	0.979372	0	0	0	0	0	0	0	0	0	0	5.1007	0.556657	0	0
RE6|1505930	5725	7	3	2	Low-quality	Genome-fragment	2.56	HMM-based (lower-bound)	Virulent	71.1223	128.303	66.7471	88.7704	87.1144	80.4518	49.7528	71.3967	116.373	49.6829	31.9457	107.403	104.526	48.655	11.6733	40.3361	39.5402	68.5477	62.983	75.5103	53.6095	115.774	46.1775	140.915	18.822	22.5329	25.236	13.6486	22.8159	20.6513	38.1233	35.4299	31.9754	26.9196	28.9656	20.0879
RE6|243636	6124	15	1	0	Low-quality	Genome-fragment	1.76	HMM-based (lower-bound)	Virulent	0	0	4.37883	0	0	0	0	0	0	0	0	0	2.36886	41.4319	1.3641	16.0814	0.880095	17.0884	29.4397	6.66997	75.7861	31.1573	166.508	1.89092	0	0	0	0	0	0	0	0	2.13515	0	0	0
RE1|1305347	13426	23	3	0	Low-quality	Genome-fragment	15.36	HMM-based (lower-bound)	Virulent	39.5941	3.12627	0	92.501	7.5669	11.4352	0	38.5372	5.17802	14.4766	1.3622	64.9836	35.3866	1.84875	0	91.8164	2.60934	0.324773	72.3963	81.1299	1.95144	0.373994	0.803698	17.8251	43.9681	0	0.597829	22.595	4.36126	4.84326	2.54003	86.6706	37.4954	6.37713	3.47379	20.4472
RE6|1500606	14800	28	3	0	Low-quality	Genome-fragment	24.55	AAI-based (high-confidence)	Virulent	64.1943	33.5597	2.71783	71.1786	127.719	24.3553	36.3528	21.6749	64.5879	15.0545	11.1216	156.921	191.383	8.19922	1.53938	17.6681	7.1013	60.692	32.8376	196.185	58.3346	73.283	3.64542	154.4	82.6214	3.41072	2.16931	2.79509	9.73877	35.149	10.1386	8.41544	95.8587	5.78509	45.1685	47.8764
RF2|1184919	5359	5	1	0	Low-quality	Genome-fragment	12.17	AAI-based (medium-confidence)	Virulent	0	0	0	0	0	0	0	0	0	0	0	0.77526	0	0	0	0	2.01146	0	0	0	0	0	0	0	3.49696	33.4913	8.98651	3.43077	216.846	6.6185	108.181	1.32806	30.4993	108.642	29.0099	16.6141
RE9|397173	7808	5	3	0	Low-quality	Genome-fragment	13.49	HMM-based (lower-bound)	Virulent	0	0	0	0	0	0	0	0	0	0	0	0	0	0	0	1.73972	0.69028	0	0	0	0	0	0	162.152	0	0	0	0	0	0	0	0	0	0	0	0
RD2|2021224	7172	11	3	0	Low-quality	Genome-fragment	14.5	HMM-based (lower-bound)	Virulent	0	0	0	0	160.969	0	7.72233	0	0	0	0	0	0	0	0	0	1.12724	0.607975	0	0	11.1332	0	0	0	0	0	0	0	0	0	0	1.48851	0	0	0	0
RE12|223562	7718	9	1	0	Low-quality	Genome-fragment	13.88	HMM-based (lower-bound)	Virulent	0	0	0	0	0.398883	0	0	0	0	1.22845	0	0	0	1.42934	39.9493	0	0	0	0	0	5.01117	3.25294	0	0.50013	0	0	0	0	0	0	0.883712	0	0	0	0	0
RE12|713400	5922	12	2	0	Low-quality	Genome-fragment	3	HMM-based (lower-bound)	Virulent	0	0	11.3205	0	2.07942	0	0	0	0	0	1.54415	0	0	0	30.0079	0	0	0	0	0	0	0	0	0	0	0	0	0	0	0	0	0	0	0	0	0
RE6|1602620	7311	13	5	0	Low-quality	Genome-fragment	15.43	AAI-based (medium-confidence)	Virulent	0	0	0	1.84141	6.31633	9.13031	0	0	0	0	2.50156	2.27308	1.98426	25.2743	1.662	12.0769	9.95226	16.1032	36.4538	42.834	80.0346	46.7028	247.955	21.1189	0	0	0	0	0	0	0	0	0	0	0	0
RE6|753481	5636	7	3	0	Low-quality	Genome-fragment	14.63	AAI-based (medium-confidence)	Virulent	8.02727	0	0	0	0	0	2.80769	0	2.05583	1.68225	0	0	6.43492	1.95736	0.134746	11.4484	0	57.2515	2.78164	4.22771	54.2347	7.12738	8.61552	4.1093	0	0	0	0	0	0	0	0	0	0	0	0
RE11|2316351	5673	4	1	0	Low-quality	Genome-fragment	13.28	AAI-based (medium-confidence)	Virulent	0	0	0	0	0	0	0	0	0	0	0	0	0	95.7713	0	0	0	0	0	0	0	0	0	0	0	0	0	0	0	0	0	0	0	0	0	0
RF11|314120	5439	6	1	1	Low-quality	Genome-fragment	5.16	HMM-based (lower-bound)	Virulent	199.632	155.628	115.862	81.0623	67.3563	214.774	148.379	91.3227	134.209	151.656	230.334	74.0941	67.3468	75.5525	11.1701	47.452	78.7794	101.013	247.885	54.4475	41.0597	69.2394	189.463	68.84	144.712	228.928	188.892	120.846	163.969	227.153	166.782	54.958	170.688	214.088	252.485	98.9005
RF8|2190862	5717	10	9	0	Low-quality	Genome-fragment	12.99	AAI-based (high-confidence)	Virulent	159.26	124.811	166.515	67.7012	59.773	210.168	98.2609	46.156	120.589	215.594	126.362	48.6898	52.0188	136.521	50.8766	40.3925	39.1241	138.813	278.336	6.54941	58.4855	145.798	223.661	66.8428	113.91	104.974	221.826	60.2987	124.481	221.278	172.988	9.3367	187.547	133.788	265.587	39.5832
RE12|1117411	5171	7	1	1	Low-quality	Genome-fragment	6.67	HMM-based (lower-bound)	Temperate	0	0	10.3717	0	1.19071	0	0	0	0	0	0	0	0	0	36.4221	0	7.29606	0	0	0	0	0	0	0	0	0	0	0	0	0	5.27595	0	0	0	0	0
RE6|1497681	7469	9	0	3	Low-quality	Genome-fragment	4.01	AAI-based (medium-confidence)	Virulent	0	8.4295	33.2103	1.80245	328.508	0	2.11865	0	6.20521	63.47	4.89728	19.4687	7.28355	142.899	212.608	0	165.249	1.1676	2.09898	0	172.051	10.7564	0	5.16803	5.01813	6.00749	0	2.46157	2.4122	0	39.2665	0	0.875328	0	0	0
RE6|1106745	6240	7	0	7	Low-quality	Genome-fragment	14.85	AAI-based (high-confidence)	Virulent	19.9383	156.951	96.6921	20.4958	70.5508	21.3948	40.5748	22.3875	38.9936	20.5121	36.6364	31.9586	19.761	63.6443	21.6632	14.1498	39.7318	19.5659	42.7106	46.9128	71.7781	88.5154	30.2617	28.4552	13.5146	20.6733	27.0121	7.36598	12.271	17.0522	37.1629	13.6866	20.9546	16.4653	13.2875	12.4849
RF9|1644801	10137	16	5	0	Low-quality	Genome-fragment	17.76	AAI-based (medium-confidence)	Virulent	15.6206	10.3515	18.5175	257.311	2.42958	71.1175	234.935	70.9467	58.865	45.8297	32.4751	79.9202	16.8152	1.36032	0.674249	139.027	12.2288	22.3676	9.27925	5.70844	3.32304	0	45.2396	0	139.576	144.41	21.3785	98.3932	235.94	156.868	59.882	83.5484	128.989	140.77	56.7442	135.407
RE2|1206945	8013	16	1	1	Low-quality	Genome-fragment	4.19	HMM-based (lower-bound)	Virulent	0	0	0	0	0	0	0	0	0	0	0	0	0	0	0	0	133.179	0	1.95648	0	0	0	0	0	0	0	0	0	0	0	0	0	0	0	0	0
RE12|1141018	14379	40	1	0	Low-quality	Genome-fragment	4.03	HMM-based (lower-bound)	Temperate	0	0.973023	1.86494	0	9.63462	0	2.20101	0	0	0	0	1.15575	3.53113	2.10982	43.7838	0	3.5609	1.21299	0	0.946911	19.4357	5.93651	0.750432	0	0	0	0	0	0.626494	0	0	0	0	0	0	0
RE6|1116134	15718	12	7	0	Low-quality	Genome-fragment	27.2	AAI-based (medium-confidence)	Virulent	1.43917	1.78026	0	0	0.783454	0	0	0	4.05438	0	0	0.528645	0	0	0	0	0	0	0	0	98.2664	1.91675	0	0	0	0	0	0	0	0	0	0	0	0	0	0
RE1|1153209	5882	6	1	0	Low-quality	Genome-fragment	3.28	HMM-based (lower-bound)	Virulent	186.52	99.9025	70.6642	115.583	45.0115	114.619	83.3983	168.89	66.975	136.205	127.481	122.901	94.9533	67.5179	9.03775	146.646	66.8902	102.301	213.224	181.712	22.2713	60.61	155.931	104.342	232.58	181.173	178.76	216.456	138.602	235.171	147.263	271.034	223.411	154.295	208.8	221.376
RE6|1720263	22505	36	1	0	Low-quality	Genome-fragment	29.24	AAI-based (medium-confidence)	Virulent	0	0	2.38311	0.299101	180.57	0.593216	0.70314	0	6.69304	2.52774	0	2.39991	4.51225	2.45094	23.9251	0.301795	66.6977	0	0	0.302502	94.6871	1.78493	0	8.7474	1.66542	0	0.713304	3.47204	12.0085	0	10.0012	0	0	1.01452	0	0.494529
RD10|2185272	8790	17	2	0	Low-quality	Genome-fragment	10.65	HMM-based (lower-bound)	Virulent	271.502	17.5088	12.2029	0	2.45166	3.03762	0	0	117.317	2.15726	0	0	7.83933	2.1963	4.66544	0.386342	4.9053	3.47244	0	0	23.2775	27.991	8.59308	19.7611	1.59899	0	58.4406	0	28.6956	1.34503	46.5563	8.90644	2.23134	8.4418	1.76864	1.68819
RE12|782263	5278	13	4	0	Low-quality	Genome-fragment	8.27	HMM-based (lower-bound)	Virulent	0	0	0	0	0	0	0	0	0	0	0	0	0.68714	0	34.6765	9.65122	0	0.826145	0	1.28985	0.709143	0	0	0	0	0	0	0	0	0	0	0	0	0	0	0
RE1|848879	8133	24	2	0	Low-quality	Genome-fragment	9.63	HMM-based (lower-bound)	Virulent	59.104	6.02101	0.824294	96.0072	15.1412	5.74526	0	154.59	19.2328	6.41169	3.37309	88.8852	73.132	5.08654	0.280129	178.712	12.9226	0.536136	1.92762	134.348	3.22144	0	3.98025	61.2247	173.968	7.58591	14.8035	211.931	63.6888	11.6295	1.67724	119.886	107.718	7.01827	2.54869	162.386
RE12|692089	25996	19	5	0	Low-quality	Genome-fragment	48.66	AAI-based (medium-confidence)	Virulent	0	20.1826	0.515771	0.258935	11.132	0.513553	1.82615	0	1.78284	38.2951	2.11058	0.958906	4.74337	110.334	59.4199	0	18.6595	2.68373	3.01533	0	30.2834	4.44255	0.415081	1.48485	2.16266	0.863017	0	0.707243	0.693057	0	9.18284	0	2.51494	11.1981	1.99343	0.285412
RE3|913421	5082	7	0	0	Low-quality	Genome-fragment	6.79	AAI-based (medium-confidence)	Virulent	15.5791	5.50614	0	0	6.05781	34.1508	40.479	0	0	26.1189	19.7932	0	80.6414	14.1098	13.4492	0	4.77246	184.472	257.586	0	10.3109	88.924	4.24654	28.8627	3.68756	7.72554	0	0	0	4.65283	0	0	0	0	3.05911	0
RE9|282444	5386	5	3	0	Low-quality	Genome-fragment	8.66	AAI-based (medium-confidence)	Virulent	11.5498	12.9884	0	3.74931	33.7238	4.95742	4.40703	0	16.1344	1.76033	13.5825	0.771374	97.6374	1.02411	4.51202	5.0441	1.00069	43.7173	29.1075	53.0873	14.825	16.781	0	129.001	0	1.04136	0	0	0	0	0	1.3214	0	2.11955	3.84859	0
RD7|1605950	38909	51	12	0	Medium-quality	Genome-fragment	68.87	HMM-based (lower-bound)	Virulent	0.290689	1.43834	0	0	15.6663	0	0	0	0	476.384	0	0	1.49137	10.4196	3.31808	0	0.415562	0	0.402922	0	2.78966	0.516203	0	0	0.481642	0	0	0	0	0	1.92823	0	0	1.7604	0	0
RD9|16394	23515	68	7	0	Low-quality	Genome-fragment	26.41	HMM-based (lower-bound)	Virulent	66.1358	86.5705	29.0796	165.455	34.6938	135.689	5.71998	18.9226	19.7094	2.41917	0.388877	112.898	17.7365	6.56787	25.6427	30.183	19.3676	14.2781	2.66677	6.0797	15.5985	12.1714	12.3896	2.29811	35.0656	33.8695	25.2587	52.3847	89.643	15.3348	13.6323	43.5831	71.4532	81.0741	12.341	63.7361
RE12|1234286	26501	39	8	0	Low-quality	Genome-fragment	30.94	AAI-based (high-confidence)	Virulent	0.426792	0	8.34804	0	11.733	0	0	0	0.874433	10.3752	1.38024	0.627089	1.77908	0	49.7193	0	0.610132	0	0	0	0.470782	0	0	1.45655	3.18218	0	0	0	0.679851	0.892257	0	0	0	0	0	0
RE5|1810336	13588	17	2	1	Low-quality	Genome-fragment	12.39	HMM-based (lower-bound)	Temperate	5.82668	1.5445	1.48013	66.629	1.13283	0	3.49371	162.592	2.9845	0	5.38384	107.32	2.13525	0.202967	0.0558897	146.704	0.198326	0.3209	3.46128	161.327	0.367271	2.58674	0.397058	30.1119	12.4125	1.23832	0.590702	260.804	2.65186	2.61028	2.0078	827.041	2.88688	2.52044	0.76275	306.055
RE12|710491	8937	12	3	0	Low-quality	Genome-fragment	11.19	AAI-based (medium-confidence)	Virulent	0	0.782763	3.00055	0	7.23399	0	0	0	6.48242	0	0	0	4.46391	6.17192	41.3833	0	3.31693	3.41533	6.13971	0.380878	22.4758	0	0	0	0	0	0	0	0	0	0	0	0.731546	0	0	0
RE7|1148109	6907	4	0	0	Low-quality	Genome-fragment	16.69	AAI-based (medium-confidence)	Virulent	108.896	36.4615	17.4709	5.84734	133.27	22.228	82.4772	26.2183	16.7753	17.1586	11.9154	329.025	70.3606	4.39223	8.13635	0.983334	7.80325	10.1008	14.7535	19.22	17.5212	409.289	8.59237	36.8844	52.9077	2.43611	67.4004	0	11.086	22.2524	21.7245	5.66727	32.1827	18.1808	13.5049	41.3572
RE3|1989057	5978	7	1	0	Low-quality	Genome-fragment	8.49	HMM-based (lower-bound)	Temperate	280.963	283.192	134.573	121.609	72.6129	180.893	158.824	164.446	179.285	175.254	411.485	127.182	149.85	155.935	17.2771	110.206	134.788	156.093	390.752	112.742	56.3495	115.074	242.776	142.054	211.603	226.114	169.176	133.785	151.445	261.06	175.704	126.197	255.914	266.397	271.329	149.558
RD9|1194478	6382	5	0	0	Low-quality	Genome-fragment	6.88	AAI-based (medium-confidence)	Virulent	49.6227	49.3262	81.9353	30.5871	9.16531	106.686	101.659	35.6716	48.1114	61.6527	25.7913	179.022	21.0261	3.88926	0.118996	39.9084	4.64484	18.4473	18.4236	2.13344	2.73686	17.3092	27.8976	3.62896	19.0867	22.8498	40.2455	21.6063	23.2902	21.3041	22.4429	12.8245	17.4151	9.83822	28.4197	40.6903
RF9|1456861	5208	13	2	0	Low-quality	Genome-fragment	8.11	AAI-based (high-confidence)	Virulent	14.1163	1.34323	0	30.3734	1.18225	2.56343	0	42.7193	2.22478	1.8205	0	15.9548	9.05288	7.94332	0	28.6908	8.79656	1.6745	0	96.078	0.239558	0	4.1438	48.176	41.381	3.23084	4.62353	141.21	85.6209	15.8909	0	136.656	72.8099	0	0	209.424
RE12|1364819	39535	63	7	1	Medium-quality	Genome-fragment	51.27	HMM-based (lower-bound)	Virulent	0.286086	0.530837	0.508713	0.170261	2.80331	0.337684	0.400257	0.785229	0	0	0	1.15596	0.366938	0.139518	75.2418	0	0.272655	0	0	0	0.157787	0	0.272934	0	0	0	0.406043	0	0	0.299048	0	0	0	0.866264	0.262154	0.187671
RD2|1695487	24013	28	7	0	Medium-quality	Genome-fragment	63.34	AAI-based (medium-confidence)	Virulent	8.00721	5.82647	0	0.560635	180.128	0.555963	11.8617	2.15467	2.65384	0	0.761625	28.0285	7.85365	1.49306	2.27705	0	41.1865	0.36317	2.61147	0	2.38997	3.76389	1.1234	1.92896	0	0	3.00829	0	0	0.492352	1.13613	0	0	0.475406	0	0.308982
RE8|953140	8965	5	4	0	Low-quality	Genome-fragment	12.59	AAI-based (medium-confidence)	Virulent	8.20053	8.5835	5.98236	0.750838	2.4038	10.4241	21.1813	0	1.29244	13.2197	70.3811	0.926853	0	24.6106	1.44008	0.7576	0.901791	19.4552	31.477	1.13907	0	44.8075	290.674	1.29169	5.22593	11.2613	12.5343	10.254	14.0677	28.3537	40.3219	0.793871	10.9389	10.1871	51.4455	2.89666
RE12|1081197	5970	8	1	0	Low-quality	Genome-fragment	8.85	HMM-based (lower-bound)	Virulent	0	4.68714	1.12295	0	2.0627	0	0	0	0	4.76439	0	0.695916	0.607491	1.84785	38.4167	0	2.25699	0	0	0	2.29879	0	0	0.646567	0.784765	0	0	0	0	0	0	0	0	0	0	0
RE5|299710	5734	11	1	0	Low-quality	Genome-fragment	15.31	AAI-based (medium-confidence)	Virulent	1.97252	4.88005	5.84582	11.1523	4.29519	2.32828	0	11.7304	8.08279	3.30699	0	7.24558	1.26499	1.44293	0	28.4278	4.69977	3.04178	0	154.939	0.87033	0	0	15.4831	3.26826	0	0	16.032	1.57104	0	0	6.20601	7.9813	3.98183	3.61502	15.5275
RF9|2550746	16233	16	2	1	Low-quality	Genome-fragment	27.16	AAI-based (medium-confidence)	Virulent	146.319	43.0946	6.60776	54.9432	40.0161	58.3918	68.237	122.712	144.539	54.3181	141.958	60.401	88.473	38.3965	0.842095	67.7808	58.2697	27.9358	72.9154	25.3726	20.5977	21.6526	73.1196	43.9907	260.617	116.093	51.9176	142.707	168.147	134.375	144.956	85.0557	239.636	100.565	93.5356	214.365
RF11|2373518	12447	10	9	0	Low-quality	Genome-fragment	11.23	AAI-based (medium-confidence)	Virulent	37.2562	60.6989	42.5496	5.40794	25.9702	48.2658	38.1397	14.9646	45.6132	38.8478	66.855	11.3487	20.6875	21.0494	5.67421	3.27399	31.3934	29.7769	37.7857	1.64083	4.91149	58.8978	45.9463	6.82254	70.3868	123.467	170.885	26.5878	92.2765	88.8114	104.661	9.14862	73.5355	106.391	65.781	43.5149
RE2|2338445	7419	13	6	0	Low-quality	Genome-fragment	17.65	AAI-based (medium-confidence)	Virulent	3.04904	37.7169	76.808	4.5365	17.0133	0	0	0	7.80879	1.27795	6.16286	5.03997	0	1.85869	21.7009	1.83094	83.9076	1.17547	4.22626	0	9.41726	12.1825	0	13.5274	0	3.77999	159.036	16.108	4.85691	1.59359	11.0319	0	19.387	15.3874	6.98494	0.500039
RF7|1098937	9125	5	1	0	Low-quality	Genome-fragment	6.31	HMM-based (lower-bound)	Virulent	45.2417	152.561	140.325	80.7752	37.449	122.165	82.3723	87.8871	132.056	32.2099	45.0959	71.4822	41.3347	4.23133	2.57998	95.2725	59.9512	49.6966	37.7973	26.8582	9.98095	106.753	38.4318	58.799	78.5548	107.565	184.718	118.876	117.972	38.8696	74.7451	41.7274	103.172	179.527	14.7655	153.27
RE12|436747	5136	10	4	0	Low-quality	Genome-fragment	12.71	AAI-based (medium-confidence)	Virulent	0	0	10.4423	0	0	0	0	0	4.51195	0	0	0	1.41228	0	33.713	0	0.524698	0	0	0	1.4575	0	0	1.50312	0	0	0	0	0	0	3.98393	0	0	0	0	0
RE9|2420036	10146	9	0	1	Low-quality	Genome-fragment	8.63	AAI-based (medium-confidence)	Temperate	43.4759	31.027	7.92902	17.5812	48.8519	19.7373	53.0279	11.219	43.9668	19.1567	11.7167	62.2415	111.168	7.61106	4.26646	10.7106	6.90579	69.6219	58.7165	53.3433	51.2771	61.3674	13.294	150.657	18.0088	12.1617	7.91096	4.07721	14.206	20.9749	10.0835	7.36538	25.1306	14.0646	27.5808	4.75333
RF12|108173	5857	6	0	5	Low-quality	Genome-fragment	3.35	AAI-based (high-confidence)	Virulent	295.458	244.85	233.501	91.3668	65.1774	255.291	275.579	227.031	244.315	227.437	452.773	143.996	99.0739	111.127	13.2255	112.483	95.2423	198.031	432.283	124.37	32.378	192.894	250.555	136.422	194.377	266.217	339.86	117.715	138.425	309.853	211.939	121.514	239.992	207.58	221.194	117.811
RF8|565164	16845	29	3	0	Low-quality	Genome-fragment	11.55	HMM-based (lower-bound)	Virulent	0	0	0	0	0	0	0	0	0	0	1.08572	0	0	0	0	0	0	0	1.86136	0	0	0	0.640573	0	0	1.99777	0	0	0	32.9875	24.6987	0	0	0	422.384	0.880924
RE9|336168	6349	8	0	0	Low-quality	Genome-fragment	14.45	AAI-based (medium-confidence)	Virulent	29.3939	5.50918	0	17.4934	64.9756	30.4898	31.1548	8.14932	70.261	4.47999	10.0821	8.50686	39.9859	3.90948	0.837298	9.09293	11.8847	118.814	45.6812	76.1309	20.4367	4.74523	0	94.8434	4.42751	8.83406	1.26421	5.06766	7.80375	0.931079	1.07426	2.24195	17.5056	0	2.44863	1.16862
RD2|516160	5606	10	1	1	Low-quality	Genome-fragment	2.26	HMM-based (lower-bound)	Virulent	1.00878	0	2.39172	4.8029	130.7	0	0	0	10.3342	0	0	1.4822	14.8795	0	0.948271	0	68.7413	17.8896	13.9826	4.85752	5.56376	0	0	39.2473	6.68576	0	0	0	23.3003	0	0	0	0	0	1.84878	0
RE1|208274	5948	19	1	0	Low-quality	Genome-fragment	5.28	HMM-based (lower-bound)	Virulent	7.6062	0	18.0336	76.9546	5.17582	4.48902	2.66042	61.7609	18.506	0	0	144.587	54.8764	0	0	129.032	13.5921	2.19926	1.31786	128.762	0	10.1303	0.907066	44.7781	31.5067	0	25.6393	91.9583	12.1162	1.9877	0	120.851	13.19	11.5157	1.74248	119.127
RE6|59194	76717	120	19	2	Medium-quality	Genome-fragment	76.65	HMM-based (lower-bound)	Virulent	0.147431	0.182373	0	0	0	0	0	0	0	0	0	3.46593	0.378192	0	3.83095	0	0.140509	0	0	0	111.968	0	0	4.47802	0	0	0	0	0.117423	0	0	0	0.51132	0	0	3.86855
RE7|1954692	7292	23	1	0	Low-quality	Genome-fragment	4.36	HMM-based (lower-bound)	Virulent	91.5133	137.186	250.066	16.1543	38.4189	140.973	88.9729	32.6391	109.638	65.0106	8.77827	38.743	11.4392	25.3402	3.74924	20.9569	66.5213	36.4762	23.6492	1.8672	13.6875	230.68	2.95953	62.4631	41.1195	97.6839	221.245	12.6066	123.538	60.8004	161.814	10.7361	55.5877	145.595	19.1878	48.8398
RE6|471296	17115	13	4	0	Low-quality	Genome-fragment	29.13	AAI-based (high-confidence)	Virulent	0.660849	0	0	0	0	0	0	0	1.35398	0	0	0	0	0	0.443722	1.19051	0	1.52862	0.915998	0	67.8664	33.1522	0.630468	1.80427	0	0	0	0	0	0	0	0	0	0	0	0
RE2|255848	5003	9	1	0	Low-quality	Genome-fragment	7.57	HMM-based (lower-bound)	Virulent	3.39109	0	0	0	8.61486	10.6739	4.7444	0	0	0	3.65558	1.66085	0	1.65376	0	0	135.2	0	3.13358	0	0	0	0	0	16.8561	36.9955	3.20866	5.51234	8.10266	7.08945	8.17968	0	18.2949	12.55	7.25063	0
RE9|2405155	5377	6	4	0	Low-quality	Genome-fragment	13.18	AAI-based (medium-confidence)	Virulent	35.7592	176.938	32.4165	28.1669	33.2077	44.6915	16.1861	3.84899	45.2521	37.9105	3.40132	53.3139	80.2641	58.4718	20.903	9.47353	23.5555	16.2187	14.5781	20.2576	13.2256	154.083	12.0407	142.139	12.1984	19.8189	41.7967	4.2741	35.1824	34.0811	8.8792	2.64722	35.2607	21.231	6.7463	2.75975
RE12|1308715	19986	18	2	0	Low-quality	Genome-fragment	38.26	AAI-based (medium-confidence)	Virulent	0	0	0	0	0.616147	0	0	0	0	0.237195	0	0	0.362926	0	44.4197	0	0	0	1.56883	0	2.87153	0.502476	0	0	2.34416	0	0.803208	0.459959	0	0.591556	19.452	0	0	0	0.777863	0
RE12|1799855	11430	9	1	0	Low-quality	Genome-fragment	4.34	HMM-based (lower-bound)	Virulent	3.95815	1.22407	6.45178	0	39.5933	0	0	0	4.05483	7.46547	0	0	2.22109	2.89546	37.8718	0	10.6097	0	0	0	29.5805	0.439304	0	0	1.63956	0	0	0	0	1.03437	5.96718	0	2.28795	0	0	0
RE10|970120	12118	21	4	0	Low-quality	Genome-fragment	35.98	AAI-based (medium-confidence)	Virulent	1.40004	0.577286	0	1.94417	2.5405	0	0	0	0.478077	0.782402	3.77308	1.71423	111.034	2.50348	0.689365	0.840719	5.11484	14.7529	4.52802	62.3591	14.2079	12.8452	1.33567	124.547	0.773238	0.925688	0	0.379301	0	0	0	0	0	1.41309	0	0
RF5|789786	5568	7	3	0	Low-quality	Genome-fragment	14.66	AAI-based (medium-confidence)	Virulent	14.2193	0	0	60.446	8.8465	2.39769	0	82.7023	7.28329	6.81117	0	47.7542	11.7243	9.90632	0	59.1606	14.5197	0	1.4078	80.0847	2.01662	0	3.87588	26.3434	68.1553	2.01464	7.20766	134.556	98.6907	12.7401	0	152.746	108.024	2.05027	3.72279	233.194
RE6|230927	5417	9	3	1	Low-quality	Genome-fragment	12.09	AAI-based (medium-confidence)	Virulent	0	10.3313	9.90066	0	22.1644	0	0	0	6.41684	20.128	0	0	164.029	38.6934	22.431	0	17.9093	0	0	0	105.024	31.516	0	4.98801	1.72976	0	0	0	0	2.18255	0	0	0	5.26856	0	1.36968
RF9|1218370	10757	17	5	1	Low-quality	Genome-fragment	21.96	AAI-based (high-confidence)	Virulent	13.1431	1.95098	4.98577	13.7666	2.28955	14.2725	5.88423	1.92396	3.23139	1.32209	4.25046	0.772449	6.40585	1.79469	0.423592	5.99823	11.2734	1.62142	7.28702	1.26575	0.463928	3.26752	19.5606	1.43535	36.1494	21.3776	151.471	14.9552	160.37	21.9817	67.8435	51.6064	37.682	16.4494	60.6998	170.367
RE6|932228	5225	7	1	0	Low-quality	Genome-fragment	12.19	AAI-based (medium-confidence)	Temperate	7.57636	0	0	0	17.6761	0	0	3.96096	6.65264	14.5166	0	0	40.9525	9.50097	16.2787	2.59977	11.8625	8.34525	0	3.90879	82.8562	23.0641	4.13032	107.12	0	0	3.07233	0	0	0	0	0	0	0	0	0
RF12|6936	7872	9	4	0	Low-quality	Genome-fragment	18.03	AAI-based (medium-confidence)	Virulent	11.4943	212.39	52.8007	98.3353	83.6911	4.23982	16.0815	32.2061	64.027	10.8397	2.32328	148.304	7.8321	17.1669	100.717	3.88256	85.5834	4.98521	4.97882	1.72963	130.753	34.4445	65.7955	9.31658	39.8753	19.9498	142.747	47.8789	289.522	55.5698	133.429	6.78073	97.1705	93.5374	206.047	49.4827
RE3|292036	8862	15	7	0	Low-quality	Genome-fragment	20.09	AAI-based (high-confidence)	Virulent	0	0	0	0	2.08435	7.53235	0	1.16768	0	0	0	0	11.8681	21.4733	0	33.3386	1.82454	223.383	10.6143	87.9592	14.7822	3.39962	0	0.871136	0	0	0	0	0	0	0	0	0	0	0	0
RE6|404086	9929	9	0	8	Low-quality	Genome-fragment	29.86	AAI-based (medium-confidence)	Virulent	479.004	559.419	278.854	223.381	177.354	296.48	322.731	388.219	399.682	382.913	664.029	282.861	251.303	253.599	30.7474	264.041	183.746	281.5	547.892	305.114	89.4656	303.934	466.221	244.142	374.181	331.588	265.959	238.406	279.895	411.996	223.251	212.53	312.109	297.786	352.817	225.3
RE5|1454511	7015	15	3	0	Low-quality	Genome-fragment	6.25	HMM-based (lower-bound)	Temperate	4.83696	0	0	16.3124	0.877714	0	0	5.16294	1.6517	0	0	13.0295	87.8892	3.53832	0	16.9434	2.68909	8.08056	3.35224	147.026	6.58045	0.715786	0	208.545	1.33572	7.99536	0	0	0	5.0561	0	4.56547	7.45583	0	2.95488	0
RD7|723904	29984	33	11	0	Low-quality	Genome-fragment	35.01	AAI-based (medium-confidence)	Virulent	0.754431	2.33309	0	0	70.4344	0	1.58326	0	0.386429	363.796	7.92941	8.17511	40.0362	35.0443	6.38261	0	13.3916	0.581696	0.522855	0	71.5267	5.35885	0	1.93103	0.625006	0.374116	0	0	0.600878	0	6.36919	0	1.30826	1.1422	0	5.44393
RE12|962941	5359	11	3	0	Low-quality	Genome-fragment	5.33	HMM-based (lower-bound)	Virulent	2.11055	10.4431	0	0	0.574469	0	0	1.93096	0	0	0	0	0	0	28.0588	0	0	0	0	0	0.465616	0	0	0	0	0	1.49775	0.857692	0	0	0	0	0	2.13023	1.93399	0
RE12|1337021	6960	17	1	0	Low-quality	Genome-fragment	9.21	HMM-based (lower-bound)	Virulent	0	0	0	0	0	0	0	0	0	0	0	0	0	0	27.7148	0	0	0.626494	0	0.489067	0.717022	1.44288	0	0.554598	0	0	0	0	0	2.54803	0	0	1.87869	0	0	0
RE5|461075	7748	10	1	0	Low-quality	Genome-fragment	20.92	AAI-based (medium-confidence)	Virulent	57.6616	46.0471	8.65254	51.2577	40.9259	27.5691	134.795	20.7014	151.787	9.78951	5.90116	71.317	83.7872	12.4583	14.4084	8.32769	21.5644	40.5199	18.2106	117.74	33.6541	117.301	14.6231	74.2309	46.5602	2.89558	12.4313	18.3902	8.72002	8.39257	7.92261	8.2671	43.878	1.4734	8.69484	14.3642
RD5|1086438	5222	6	0	0	Low-quality	Genome-fragment	3.29	AAI-based (medium-confidence)	Virulent	62.8116	46.8871	66.7574	171.44	43.626	80.5315	75.7572	284.362	127.582	49.0216	78.8012	116.953	47.2266	25.3505	3.63572	110.553	37.6722	36.7402	43.5314	67.7913	16.4852	33.6544	19.6303	47.3076	152.52	51.5549	170.612	123.227	93.1542	54.3371	61.387	154.689	66.3548	83.0725	51.6029	138.531
RF8|2482531	13668	13	0	11	Low-quality	Genome-fragment	7.83	AAI-based (medium-confidence)	Virulent	407.963	675.602	1052.1	136.91	123.657	546.985	1112.6	129.464	454.803	383.255	940.002	161.102	140.102	178.575	113.292	97.1476	141.959	424.3	892.945	62.2605	46.8268	601.755	485.523	135.558	271.135	566.702	819.793	110.638	309.769	457.586	707.1	66.3905	411.365	439.331	373.835	142.768
RE10|918690	39746	60	16	0	High-quality	High-quality	100	AAI-based (medium-confidence)	Temperate	0	0.352013	0	0	0	0	0	8.85201	1.16607	3.69742	0	0	342.634	0.208166	0	0	0	0	0	0.599491	0	0	0	0	0.235749	0	0	0	0.226648	0	0	0	0	0	0	0
RE12|714368	11913	15	1	1	Low-quality	Genome-fragment	22.83	AAI-based (medium-confidence)	Virulent	0	0	1.12549	0	0.258422	0	0	0	0	0	0	0	0	0	40.7349	0	0.904844	0	1.31598	0	2.40873	0	0	0	1.57309	0	1.34751	0	0	0	17.7483	0	5.48798	0	1.73999	0
RE12|168900	57673	39	2	6	Low-quality	Genome-fragment	12.3	HMM-based (lower-bound)	Virulent	34.5159	148.71	91.2494	61.0416	19.0033	31.4817	75.1794	11.8421	67.9052	13.727	10.9404	118.646	23.3929	5.11674	87.7901	5.59386	7.75658	2.87301	4.75704	0.590208	2.63918	7.4875	9.16776	2.81102	14.0536	3.11203	31.8703	4.62243	7.57556	11.3774	24.2436	6.47869	18.8178	12.5693	8.26653	11.7714
RE6|554018	13121	20	19	0	Low-quality	Genome-fragment	29.81	AAI-based (medium-confidence)	Virulent	0	0	0	0	0	0	0	0	0	0	0	0	0	0.420383	0	0	0.616154	0	0.597412	0	118.952	11.8633	1.23357	0	1.07119	0	0	0	0.34328	0	0	0	0	0	0	0
RE5|1677938	75125	115	8	1	Medium-quality	Genome-fragment	73.18	AAI-based (high-confidence)	Virulent	159.513	94.4225	65.4113	133.684	161.295	194.591	114.903	126.931	84.9818	140.277	238.699	108.006	52.8138	76.8363	11.6859	96.4651	83.5449	94.4341	171.955	93.8368	21.4732	59.8204	296.459	79.1783	129.279	157.232	50.1086	147.329	139.397	216.549	131.643	76.4521	137.849	97.1018	187.764	90.4177
RE1|150301	6549	9	2	1	Low-quality	Genome-fragment	4.94	HMM-based (lower-bound)	Virulent	24.1786	2.13637	2.04733	62.6977	7.99143	2.03853	3.62441	87.6949	19.4615	2.17159	0	67.8797	27.1354	0.842242	0	96.9677	4.5264	0	3.59077	82.6418	4.19111	0	0.823825	40.6689	87.2768	0	12.256	108.084	32.325	5.41587	2.08291	76.0718	46.9198	13.9452	3.95643	103.663
RE7|85271	6615	4	1	0	Low-quality	Genome-fragment	3.44	HMM-based (lower-bound)	Virulent	11.9687	22.2081	4.05381	5.59667	7.9117	38.3456	29.902	12.5146	7.00631	1.43328	5.52952	20.726	16.4477	15.0091	4.82177	0	0.81477	1.31834	4.73992	0	0.754418	383.33	10.6029	6.41875	0	0	9.70697	0	0	1.78728	5.15532	3.22769	1.97667	1.72576	1.56678	3.36489
RF3|2152591	8682	26	1	0	Low-quality	Genome-fragment	13.1	HMM-based (lower-bound)	Virulent	68.3941	19.3381	66.4067	17.4445	53.5436	302.927	75.6396	5.95946	19.3512	44.7739	125.339	31.5831	25.0637	57.4964	3.67381	7.4318	49.0424	37.1653	109.246	12.5461	7.18509	99.4763	193.264	13.7826	59.359	71.7082	19.4144	32.8237	42.5412	133.453	59.7048	22.1332	40.6638	74.2916	145.639	43.157
RE3|1089599	16497	32	3	1	Low-quality	Genome-fragment	23.81	HMM-based (lower-bound)	Virulent	0	0	0	0.204015	0	0	0	0	0.702351	0	0	0	0	0	0	0.823409	0	259.292	0	0	0	0.304373	0.654086	0	0.283994	0.339986	0	0	0	0	0.413438	0	0	0	0	0
RE1|767772	5889	7	0	1	Low-quality	Genome-fragment	5.68	AAI-based (medium-confidence)	Virulent	0	0	0	17.1454	0	0	0	7.90729	0	0	0	21.1646	0	15.4545	0	149.931	0	0	0	17.9183	0.423712	0	0	3.93276	0	0	0	90.5381	0	0	0	88.8273	0	0.969258	0	74.3344
RF12|2096981	5402	4	1	1	Low-quality	Genome-fragment	1.24	HMM-based (lower-bound)	Temperate	745.374	542.602	369.824	233.638	235.367	511.573	720.612	339.059	455.788	541.454	888.714	257.645	285.331	385.966	57.2173	184.822	286.347	389.062	792.281	254.568	127.025	342.991	678.149	257.953	461.393	594.93	597.304	319.925	413.564	703.637	489.883	235.171	551.879	566.358	697.409	287.059
RE6|2260767	5135	15	2	0	Low-quality	Genome-fragment	7.68	HMM-based (lower-bound)	Virulent	2.20261	0	5.22219	0	97.1237	0	6.16326	0	0	18.4638	0	0	2.8251	0	4.73257	0	1.5744	0	0	0	50.2935	1.95569	0	0	0	0	0	0	0	0	3.98471	0	0	0	0	0
RE12|701834	9509	11	4	0	Low-quality	Genome-fragment	22.69	AAI-based (high-confidence)	Virulent	0	0	0	0	0	0	0	0	0	1.99414	0	0	0	2.90033	34.4215	0	3.6842	0	0	0	2.62408	2.11221	0	0	0	2.35934	0	0	1.8947	3.10833	4.3036	0	3.4377	0	0	0
RE1|534971	5188	8	1	0	Low-quality	Genome-fragment	4.72	HMM-based (lower-bound)	Virulent	18.531	9.43887	15.5065	33.0854	8.90106	23.1598	18.3009	30.9164	18.9836	26.499	0	31.2317	30.7586	9.03713	15.5165	62.8393	47.269	29.4167	3.02184	32.1495	16.1123	35.8107	6.23966	33.4812	61.4077	22.7031	26.301	36.3244	49.4869	18.2311	11.832	19.8915	55.448	18.7038	1.99774	30.033
RE6|338404	16254	16	12	0	Low-quality	Genome-fragment	43.21	AAI-based (high-confidence)	Virulent	0	1.72156	0	0.41413	0.947023	0	0	0	0.356426	0.291656	0	2.04485	0.892512	0	0.0934452	0	0	0	0.964519	0.418839	125.883	10.8123	3.65126	0	0.576479	0	0.987628	0	0	0.727381	0	0	0	0	0	0
RD1|998973	25126	22	13	0	Low-quality	Genome-fragment	35.74	HMM-based (lower-bound)	Virulent	24.9832	0.278419	4.53585	143.595	115.542	2.65668	8.81709	4.73621	11.5286	0.566016	6.18704	7.27546	0	0	0.0302248	4.86564	1.17979	5.72686	2.49579	1.62568	3.12823	0	0.644181	1.22901	0	0	0	0.365866	1.43411	0	0.814355	0	0.260202	0.454347	1.64996	0
RE6|807728	20568	40	9	0	Low-quality	Genome-fragment	29.58	HMM-based (lower-bound)	Temperate	0	0.680236	0	0	0	0	0	0.503112	0.281668	0	0	1.21197	0.352657	0.268176	0.0738457	0	0	0	0	0	105.424	19.2862	2.88543	0.375341	0	0	0	0	0	0	0	0	0	0	0	0
RF11|1589847	23700	27	3	1	Low-quality	Genome-fragment	28.78	HMM-based (lower-bound)	Virulent	176.576	198.945	76.0917	10.3667	35.9817	282.216	100.153	21.8312	205.822	218.826	284.365	27.8728	49.8866	96.5854	2.27508	6.44799	23.7647	141.299	67.8027	0.430874	21.1621	105.086	186.898	24.7562	170.006	279.254	106.342	14.5455	179.407	248.679	117.992	3.00298	227.307	177.501	179.734	23.7928
RE5|1380007	30119	33	11	1	Medium-quality	Genome-fragment	81.98	AAI-based (medium-confidence)	Virulent	2.81643	0.929055	0.445167	16.0912	2.04428	0	0	6.18427	2.50053	0.944368	0.607221	6.06937	90.4303	5.31091	0	17.8146	1.52105	9.12065	0.520512	164.889	8.1189	4.50126	1.07478	203.9	2.95547	4.65549	0	2.59432	0	0.785076	0	5.08041	4.12426	0	0	1.47805
RE12|1468401	5116	6	1	0	Low-quality	Genome-fragment	5.61	AAI-based (medium-confidence)	Virulent	0	2.73477	5.24158	1.31573	4.81404	6.52381	0	0	0	0	0	1.62417	8.50678	15.6332	34.7354	0	3.1605	0	0	0	5.36505	0	0	0	0	0	0	0	0	0	0	0	0	0	0	0
RF9|2638210	8825	14	1	0	Low-quality	Genome-fragment	12.53	HMM-based (lower-bound)	Virulent	15.3796	14.2685	30.3863	60.2572	16.3958	31.0121	32.2759	106.705	13.1294	13.9666	46.6289	67.3213	43.1508	11.2504	2.83979	139.686	29.6205	15.317	40.8587	49.3711	4.66532	32.4318	29.3451	40.6777	71.6693	52.7508	69.123	151.563	61.757	33.4925	42.5073	141.535	56.3031	32.9865	45.2151	151.755
RE12|1011812	12098	28	3	0	Low-quality	Genome-fragment	21.79	HMM-based (lower-bound)	Virulent	0	0	0	0	0.50894	0	0	0	0	0	0	0	0	0	151.974	0	0	0	0	0	1.34064	0.830094	0.44596	0	0	0	1.32691	0	0	0	0	0	0.540406	0	0	0
RE6|987254	5179	6	6	0	Low-quality	Genome-fragment	11.98	AAI-based (medium-confidence)	Virulent	0	0	0	0	0	0	0	0	0	0	0	0	0	0	0.586545	0	2.08137	57.2518	201.301	2.62901	76.847	3.87815	2.0835	75.2772	0	0	0	0	0	0	0	0	0	0	0	0
RE6|1497973	27443	42	6	0	Low-quality	Genome-fragment	30.51	HMM-based (lower-bound)	Virulent	0	0	0	0	0	0	0	0	0	0	0	3.63338	0.26431	0	3.90189	0	0	0	0	0	94.6068	0	0	5.62622	0	0	0.584955	0	0	0	0	0	0	0	0	2.83881
RE12|538399	7924	17	1	0	Low-quality	Genome-fragment	5.67	HMM-based (lower-bound)	Virulent	0	0.882831	0	0	2.33108	0	0	0	0	101.703	0	0	0	0.696093	48.3988	0	12.5832	0.550277	0	0	6.14048	0	0	0	0	0	0	0	0	0	0.860738	0	0	0	0	0
RE12|1416005	5581	9	9	0	Low-quality	Genome-fragment	12.25	AAI-based (high-confidence)	Virulent	9.11968	0	19.2195	0	12.1356	2.3921	25.5183	5.56245	1.03805	0	0	8.93306	1.29967	0	37.4204	0	1.93145	1.56259	89.8895	0.60991	0	52.1827	3.86685	0	5.87625	2.00994	38.8307	2.47072	18.5623	15.8881	23.2197	6.37615	18.7431	12.273	33.4271	11.3002
RD1|2490306	5198	10	1	0	Low-quality	Genome-fragment	6.81	HMM-based (lower-bound)	Virulent	16.3194	10.7665	5.1589	65.3961	13.0298	30.8203	9.13284	60.7184	15.6035	20.976	24.6291	64.7411	42.5606	12.2032	0.730502	73.1715	21.256	13.4218	28.6522	49.7686	4.80038	9.65995	21.7968	33.4167	53.1777	33.4496	24.7063	107.879	67.5887	29.5685	10.4971	53.3985	59.1146	38.4337	17.945	103.486
RF1|1269179	6535	9	8	0	Low-quality	Genome-fragment	12.78	AAI-based (medium-confidence)	Virulent	0	0	0	11.8454	0	0	0	10.2926	0	1.45083	0	10.8077	4.43975	0	0	23.9041	3.29898	0	0	59.9004	0	0	0	38.984	43.7319	0	0	123.086	26.1911	0.904579	0	99.6497	51.0221	2.62033	1.58596	135.676
RE5|1236382	5182	10	2	0	Low-quality	Genome-fragment	8.32	AAI-based (medium-confidence)	Virulent	6.54791	0	0	20.134	6.535	2.57629	9.16104	9.98457	0	1.82963	0	0	4.19922	5.32212	0	22.2814	0	16.829	12.1014	158.963	1.44456	0	0	3.72444	0	2.1647	0	0	0	1.14076	0	0	0	0	0	0
RE10|1517054	8414	10	2	1	Low-quality	Genome-fragment	12.36	HMM-based (lower-bound)	Virulent	7.39331	3.32567	1.59353	0	7.31776	6.34672	0	0	8.95096	3.38049	8.69451	4.93774	174.138	0.655555	1.44413	0	0.640564	4.14585	16.7692	0	15.421	1.19354	0	97.2571	0	0	0	0	0	0	0	0	0	0	2.46357	0
RD6|1230157	10774	14	1	0	Low-quality	Genome-fragment	16.3	HMM-based (lower-bound)	Temperate	23.0954	1.2986	2.48895	11.2458	46.2901	19.826	121.905	0.960461	423.719	13.2	106.943	0.77123	43.7604	1.53588	9.72724	1.26079	13.2566	26.7112	152.786	18.6403	28.3708	2.79631	8.01222	5.73233	1.73939	0	1.48997	3.41293	9.19732	1.09735	7.59661	0	36.4089	0	2.40492	0
RD2|1818750	20481	32	1	0	Low-quality	Genome-fragment	14.26	HMM-based (lower-bound)	Virulent	7.73136	4.09876	1.30931	6.73751	212.093	1.30368	9.27152	0.505249	22.3463	0.925848	3.12539	10.7512	18.5931	1.21192	2.29894	3.64781	121.578	18.9481	2.67909	6.14934	6.57892	1.96133	5.79537	60.4981	12.3526	1.64311	0	0	36.7266	2.30904	0.999047	0	6.06507	0	2.02417	0.724533
RE9|413415	5870	7	0	0	Low-quality	Genome-fragment	5.03	AAI-based (high-confidence)	Virulent	15.4146	5.95873	1.14208	5.16025	13.1115	5.68583	17.5225	0.881431	7.89552	2.42278	1.55783	7.07771	70.4338	1.4095	0.646873	2.3141	0	34.17	10.683	67.2663	13.1776	10.2649	0	107.843	1.59627	0.955493	0	0	0	0	0	0.606223	0	0	0	0
RE10|894547	78495	164	4	1	High-quality	High-quality	100	AAI-based (medium-confidence)	Temperate	45.1005	40.8174	23.4014	45.2781	14.1192	41.4992	29.5336	83.2507	39.8548	22.2247	8.3878	48.6942	48.9292	15.354	5.21476	125.636	25.165	19.8869	14.48	76.4952	13.081	33.6476	11.5472	41.8972	64.5205	46.5162	35.4823	106.631	43.7823	29.7473	40.7518	90.6236	48.7245	40.5763	9.30861	79.0212
RE12|1889297	14355	13	8	0	Low-quality	Genome-fragment	31.62	AAI-based (medium-confidence)	Virulent	0	0	0	0	0	0	0	0	0	0	0	0	0	0	45.0738	0	0	0	0	0	0	0	0	0	0	0	0	0	0	0	0	0	0	0	0	0
RE12|111262	12869	28	8	0	Low-quality	Genome-fragment	18.66	HMM-based (lower-bound)	Virulent	0	2.71799	4.68847	0	10.7651	0	0	0	0.450178	15.4716	2.84232	0	1.40909	11.3583	55.4716	0	17.5901	0	0	0	14.736	0.780362	0	0	0	0	0	0	0.350002	0	5.29994	0	1.01606	2.21772	0	0
RE10|1259975	7520	12	2	0	Low-quality	Genome-fragment	13.34	AAI-based (medium-confidence)	Virulent	15.0405	14.8842	0	0.895115	0.818771	0	0	0	10.0151	0	0	6.62971	191.464	0	1.51482	0	1.43343	8.11776	2.08475	0	9.62259	4.00631	2.8698	91.8804	6.23012	0	0	0	0	0	0	0	1.73878	0	0	0
RD1|1711672	14942	29	4	0	Low-quality	Genome-fragment	18.05	HMM-based (lower-bound)	Virulent	0	0	0	181.323	0	0	0	0	0	0	0	0	0	0	0	0	0	0	0	0	0	0	0.722156	0	0	0	0	0	0	0	0	0.238156	0	0.764015	0	0
RE3|127676	9850	18	1	0	Low-quality	Genome-fragment	17.71	HMM-based (lower-bound)	Virulent	8.612	0.710208	10.8897	0	11.2517	7.4545	1.60651	4.72751	26.467	9.14425	0	4.21789	12.8868	5.59984	3.31528	0.344766	14.7738	376.278	1.5916	7.94821	26.979	3.05862	5.47739	9.79697	23.3063	1.13883	13.0379	0	8.68827	6.00145	50.5478	4.33526	24.5583	2.31795	29.4618	3.38966
RF5|64218	10661	9	0	4	Low-quality	Genome-fragment	8.29	AAI-based (medium-confidence)	Virulent	83.2819	101.052	101.871	129.12	73.0589	133.992	161.047	228.586	76.6214	117.392	199.855	191.344	104.437	38.0278	5.34258	260.565	59.9081	59.7146	140.435	57.7908	9.59617	87.6044	164.979	59.7412	122.608	142.573	267.272	264.288	119.988	182.427	238.631	247.338	109.158	137.599	201.724	239.409
RD6|850701	6426	8	1	1	Low-quality	Genome-fragment	7.29	HMM-based (lower-bound)	Virulent	115.287	198.131	272.291	60.7553	49.3454	196.328	286.884	70.0495	209.159	157.872	335.837	40.7315	46.8438	37.3388	25.4089	42.2775	81.3572	99.7476	146.38	18.0101	18.0561	173.47	109.147	11.413	67.8041	187.656	161.129	46.493	77.1024	149.947	192.112	28.2423	125.14	149.228	92.7396	47.3394
RF5|990501	6769	8	1	1	Low-quality	Genome-fragment	0.81	HMM-based (lower-bound)	Virulent	1.67092	4.13388	3.96158	39.777	4.54806	1.97228	0	191.856	0	0.700336	5.40372	115.389	1.07157	0.814868	0	286.967	2.3887	0	0	76.9387	0.921568	4.4508	0	67.8594	8.3056	0	4.74307	95.0645	0	0	0	225.004	1.9317	0	0	137.562
RF1|1478131	20823	35	7	0	Low-quality	Genome-fragment	43.44	AAI-based (medium-confidence)	Virulent	0	0	0	0	0	0	0	0	0	0	0	0	0	0	0.0364707	0.652345	0.258834	0	0	0	0	0	0	1.29761	0	0.538707	0	200.869	0.865232	0.567778	0	143.722	8.16326	0.822354	0.497731	21.379
RE11|1126246	6212	14	1	1	Low-quality	Genome-fragment	3.14	HMM-based (lower-bound)	Virulent	27.3111	7.88295	9.71279	1.08359	0.495586	8.59648	24.1999	0.832904	7.46084	0.763131	33.8574	6.01925	5.83825	128.306	1.83378	3.28005	5.63958	5.61545	37.8557	5.47957	4.61932	6.4665	45.1629	3.10689	10.5587	11.7376	3.87627	2.21975	1.45015	14.2742	36.2325	0	6.31471	15.6206	18.3527	5.37478
RE12|1519319	5220	12	4	0	Low-quality	Genome-fragment	5.54	HMM-based (lower-bound)	Virulent	0	0	0	0	0	0	0	0	0	0	0	0	0	0	45.1002	0	0	0	0	0	0	0	0	0.739465	0	0	0	0	0	0	0	0	0	0	0	0
RD7|228965	5877	5	4	0	Low-quality	Genome-fragment	9.06	AAI-based (high-confidence)	Virulent	0	0	1.14072	0	1.04767	0	0	0	0	219.404	0	0	4.93684	5.16201	18.2201	0	2.75125	0	0	0	1.69831	0	0	0	0	0	0	0	0	0	10.4449	0	0	1.94247	0	0
RD5|1861743	7314	7	2	0	Low-quality	Genome-fragment	10.75	HMM-based (lower-bound)	Virulent	43.2994	15.3034	3.66639	135.288	8.83924	10.0392	2.16354	284.379	20.5943	7.77781	13.7529	101.679	54.5446	28.2806	0	230.761	9.57973	4.76937	8.57386	519.848	9.72303	7.55177	21.3921	103.44	74.9454	9.96906	4.38964	186.017	30.7915	43.6446	20.5156	306.518	55.4205	1.56083	25.5068	165.86
RD5|824555	5302	10	3	0	Low-quality	Genome-fragment	4.14	HMM-based (lower-bound)	Virulent	2.13324	0	0	0	0	0	0	238.109	0	0	0	0	0	0	0	0	0	0	0	0	0	0	0	0	0	0	0	0	0	0	0	0	0	0	0	0
RE2|582493	9653	13	3	0	Low-quality	Genome-fragment	7.17	AAI-based (medium-confidence)	Virulent	0	0	0	0	49.1144	0	0	0	0	0	0	1.72159	9.39274	1.14282	0	0	115.019	0	0	0	0.258493	0	2.23567	0	1.94138	0	0	0	5.59931	2.44957	3.53283	0	0	0	10.7368	0
RE9|1777220	9793	14	1	0	Low-quality	Genome-fragment	23.19	AAI-based (medium-confidence)	Virulent	5.19728	6.42908	0	20.277	11.9459	9.54277	4.84759	0	6.50738	6.77709	16.8079	4.66668	158.875	9.85676	7.98746	24.9676	13.7591	35.1753	68.0369	56.6565	17.0715	95.3692	14.3241	295.62	41.1431	11.4546	13.1138	5.63223	11.4985	4.22546	10.447	0.72675	31.3773	14.5715	25.4	10.607
RF7|2055383	8663	11	5	0	Low-quality	Genome-fragment	8.16	AAI-based (high-confidence)	Virulent	55.4881	72.6769	57.2659	10.8782	39.0908	72.4305	51.1459	13.7368	54.1684	54.1748	98.1685	12.4691	21.7695	24.1951	5.43514	13.7202	48.5279	42.2802	40.7179	5.50095	5.47264	65.497	62.279	11.5849	69.7647	125.603	205.688	29.7122	88.9086	96.215	111.798	7.80469	88.298	120.577	73.5774	48.3904
RF8|606224	7212	13	1	0	Low-quality	Genome-fragment	6.4	HMM-based (lower-bound)	Virulent	0	0	3.71824	0	0	0	0	0	0	0	0	0	0	0	0.210602	0	0	1.20921	0	0	0	1.39247	0	0	0	1.55539	0	0	0	0.819665	9.45714	0	0	1.58291	214.844	0
RE6|17046	5391	4	1	0	Low-quality	Genome-fragment	2.43	HMM-based (lower-bound)	Virulent	4.19604	2.59527	17.4097	0	64.5297	0	0	0	2.14926	94.9697	0	4.62395	6.05463	99.2463	43.1062	0	37.9909	0	0	0	84.702	3.72565	0	5.72807	3.4762	0	0	0	0	0	18.9774	0	0	11.6467	0	0
RE10|230691	23469	37	8	5	Low-quality	Genome-fragment	37.43	AAI-based (medium-confidence)	Virulent	86.5065	39.048	4.28479	17.0655	97.0706	34.131	28.656	5.73199	74.7958	12.5236	32.3401	14.6931	215.109	6.69826	2.97701	6.94556	1.49274	150.307	75.484	84.5574	29.185	47.9253	2.29887	142.104	4.59142	3.58478	0	0	1.9192	2.26694	0	0	1.11429	0.243213	0.662422	0
RF7|2176747	10527	14	4	0	Low-quality	Genome-fragment	13.28	HMM-based (lower-bound)	Virulent	30.0838	110.977	82.152	74.4934	26.0277	86.2375	67.6439	66.3523	84.2007	24.7679	46.0393	54.8582	34.4516	5.23971	1.65925	55.4861	48.1269	42.6637	24.5726	21.6645	4.38509	84.4267	16.4004	42.9012	47.1754	75.657	132.669	81.6492	68.4591	26.9543	45.3533	35.156	72.0422	136.64	16.7372	105.37
RE12|245279	11788	29	3	0	Low-quality	Genome-fragment	23.82	AAI-based (medium-confidence)	Temperate	0	2.37379	9.0994	0	1.56697	0	0.671198	0	0.491461	0.402152	0	0	1.23065	2.57356	214.532	0	0.457219	0.739802	2.65987	0	17.9925	0.851924	0	1.96471	0	0	1.3618	0	0	0	0	0	0	0	0	0
RE5|2441303	7340	14	1	0	Low-quality	Genome-fragment	3.12	HMM-based (lower-bound)	Virulent	33.9005	34.3106	6.39345	54.5654	22.649	56.3842	22.6367	74.7199	14.2071	24.5425	46.096	36.7916	29.1521	36.4466	0.206929	37.013	28.6374	21.9802	73.6876	176.688	14.2779	18.4705	36.7522	39.4415	36.3825	27.5088	6.56114	30.6842	37.4326	38.6578	17.6552	50.4206	57.0056	12.4424	28.2405	23.7548
RE12|832376	10989	13	4	0	Low-quality	Genome-fragment	25.87	AAI-based (medium-confidence)	Virulent	1.02925	41.3787	106.151	5.81918	22.1319	7.28929	0	0	18.979	2.58835	0	3.40264	0.660064	1.25486	29.6474	1.23612	92.6976	5.55515	7.8465	0	8.74207	33.3561	4.90966	16.5093	0	2.55198	138.047	20.9135	11.8865	1.07588	6.82732	0	28.5573	15.0633	4.71574	1.01277
RE4|1152736	5310	4	0	2	Low-quality	Genome-fragment	5.29	AAI-based (medium-confidence)	Virulent	316.309	301.691	239.879	133.104	68.4129	233.819	315.887	237.751	300.032	214.263	494.248	102.496	120.208	112.706	30.177	123.431	83.2308	255.383	422.195	121.797	25.3753	214.656	294.655	105.405	203.813	224.984	222.201	117.722	159.47	283.882	267.168	106.555	233.934	230.038	266.426	99.2072
RE3|847699	6265	12	1	0	Low-quality	Genome-fragment	1.56	HMM-based (lower-bound)	Virulent	0	0	0	0	0	0	10.1032	0	0	0	0	0	0	0	0	5.4205	0	196.966	0	0	0	0	0	0	0	0	0	0	0	0	0	0.568001	0	0	0	0
RD2|2091389	11084	13	0	0	Low-quality	Genome-fragment	21.46	AAI-based (medium-confidence)	Virulent	0	0	0	0	199.147	0	1.42766	0	0	0.85539	0	0.74966	0	0	2.53509	0	27.4737	0	0	0	5.4029	0	0	1.393	0	0	0	0	0	0	0	0	0	0	0	0.669396
RE12|719555	5500	5	1	0	Low-quality	Genome-fragment	11.07	HMM-based (lower-bound)	Virulent	0	0	0	0	0	0	0	0	0	0	0	0	1.31881	0	53.5743	0	0	0	0	0	0	0	0	0	0	0	0	0	0.818942	0	0	0	0	0	0	0
RE6|2260551	5391	15	1	0	Low-quality	Genome-fragment	8.2	HMM-based (lower-bound)	Virulent	0	0	0	0	0	0	0	0	0	0	0	0	0	0	0	0	0	1.61766	0	0	55.3109	0	0	0	0	0	0	0	0	0	0	0	2.42546	0	0	1.37629
RE12|1545519	42658	62	5	1	Low-quality	Genome-fragment	32.23	HMM-based (lower-bound)	Temperate	2.12114	0.655966	0.47147	3.23482	0.144338	0.312962	3.70954	0.242581	5.83979	0	0.857466	3.60357	3.74082	0.517215	72.0833	0.398043	0.758081	0.204435	0.367511	0	0.233976	0.235418	0.505905	0	1.20811	0.78889	1.69342	1.07749	0.844705	4.15731	1.11921	1.16788	2.29892	0.802845	1.21481	0.956625
RF1|1070171	5488	9	2	0	Low-quality	Genome-fragment	4.55	HMM-based (lower-bound)	Virulent	34.0055	8.9229	2.44314	23.3043	1.12193	9.73056	41.8095	50.9104	4.22255	9.50188	6.66505	59.0489	2.64338	12.5634	0.55352	23.5142	8.8388	10.3289	14.2833	2.48098	0.454672	21.9588	23.5943	10.5503	98.1743	70.5181	48.264	255.447	114.903	112.024	114.338	78.4588	36.9301	43.6833	29.2722	87.8777
RE6|69148	7745	9	1	1	Low-quality	Genome-fragment	10.38	HMM-based (lower-bound)	Virulent	10.9526	21.6776	12.1182	13.9058	77.1136	4.30934	2.04315	8.01653	20.1963	31.2162	1.18069	21.457	24.8181	47.0039	34.319	5.7001	44.1893	2.81497	5.06046	9.66894	48.3261	3.2416	0.696608	19.9355	12.7032	0.724176	3.10902	8.90194	8.7234	5.3428	15.8514	5.51354	14.3503	19.1616	3.34547	5.7479
RD10|1791341	5457	8	1	0	Low-quality	Genome-fragment	2.46	HMM-based (lower-bound)	Virulent	216.591	179.472	120.394	86.9625	80.6738	172.475	268.231	177.302	145.444	173.743	291.577	95.1672	94.3732	115.735	14.0558	83.3895	88.8901	103.876	189.61	94.8129	38.1807	116.859	191.804	96.9069	200.898	212.756	114.727	110.34	148.571	272.985	111.238	83.4693	129.391	146.438	263.047	122.368
RD1|697223	5266	14	2	0	Low-quality	Genome-fragment	6.37	HMM-based (lower-bound)	Virulent	18.2565	1.32844	0	256.928	3.50769	3.80279	0	111.026	3.30042	22.5056	0	89.1515	40.6336	0.523722	0	54.8149	0	0	11.9083	46.5403	4.97531	0.953521	2.04908	24.9222	58.7188	0	3.04841	33.1679	4.27666	11.2256	1.29519	73.6574	2.48303	3.25178	2.95222	42.9733
RD7|257784	6552	6	0	6	Low-quality	Genome-fragment	7.34	AAI-based (medium-confidence)	Virulent	208.014	198.592	163.711	105.818	66.2515	151.801	134.042	108.187	209.558	248.894	203.768	107.163	77.4941	113.651	22.718	71.008	70.3327	167.042	356.52	54.0303	39.9878	153.274	200.921	76.5874	146.587	191.752	164.155	71.5552	167.738	231.874	140.532	65.1745	192.583	162.91	166.094	88.3283
RE12|606396	5650	7	1	0	Low-quality	Genome-fragment	11.54	AAI-based (medium-confidence)	Virulent	0	0	2.37309	0	1.08976	0	0	0	0	0	0	0	0	0.976255	45.5658	2.40421	45.3117	0	0	0	4.19553	0	0	7.51506	0	0	4.26183	0	19.1328	4.18508	28.972	0	0	0	0	0
RE9|485176	6888	7	2	0	Low-quality	Genome-fragment	15.43	AAI-based (medium-confidence)	Virulent	1.64205	8.12491	1.94657	13.6814	27.7108	10.6601	17.2301	1.50232	9.25185	8.94707	0	0.603168	152.693	8.0079	0.330762	15.2837	10.5634	84.1946	35.2785	117.615	15.7582	43.01	1.56656	230.323	20.4053	1.62856	11.6528	2.6692	10.4627	8.58221	4.951	1.03325	33.2207	0	13.5421	3.77011
RE10|1394978	15948	27	6	0	Low-quality	Genome-fragment	30.6	AAI-based (medium-confidence)	Virulent	0	4.38648	0	29.1232	10.231	0	0	5.83973	7.26529	0.594504	0	2.6051	231.503	0	0.571429	12.1375	0.67591	15.0377	3.9321	96.9008	27.5371	5.66731	0	60.0252	1.17508	0.703379	0	0.57642	0	0	0	0.892533	0	0	0	0
RE6|849161	5170	9	4	0	Low-quality	Genome-fragment	4.99	HMM-based (lower-bound)	Virulent	0	0	0	0	0	0	0	0	0	0	0	0	0	0	0	0	0	0	0	0	60.0884	0	0	0	0	0	0	0	0	0	0	0	0	0	0	0
RE10|558385	7692	10	2	3	Low-quality	Genome-fragment	1.88	AAI-based (medium-confidence)	Virulent	8.82249	1.81892	2.61466	0.875099	2.00116	30.3732	14.4006	4.03588	3.76582	4.31409	42.7977	5.94134	207.457	33.7031	3.85046	15.8936	13.3131	190.47	198.718	8.85051	56.7689	89.4319	42.7859	366.831	14.6179	32.8125	2.08696	2.98776	12.2969	22.287	8.86699	0.925254	23.7986	0.742064	14.1478	3.85834
RF2|979766	6167	16	1	0	Low-quality	Genome-fragment	4.2	HMM-based (lower-bound)	Virulent	0	0	0	0	0	0	0	0	0	0	0	0	0	0	0	0	6.55469	0	0	0	0	0	0	0	6.83727	20.0085	0	2.98127	241.021	0	5.52983	0	27.5634	139.76	0	16.8435
RD7|86870	14036	29	2	0	Low-quality	Genome-fragment	12.81	HMM-based (lower-bound)	Virulent	0	0.996801	2.86577	0.959143	1.97401	0	0	0	0	269.857	0	2.36798	0.516774	8.44903	16.9892	0	0.575987	0	0	0	1.15553	0	0	0	0	0	0	0.65494	0	0	10.2045	0	0	0.813331	0	0.264305
RE1|14143	5360	6	1	0	Low-quality	Genome-fragment	7.61	HMM-based (lower-bound)	Temperate	311.248	174.889	137.582	100.467	79.262	180.578	177.136	183.407	198.876	206.958	400.923	109.291	120.44	147.672	22.2445	108.341	121.671	148.058	348.059	109.23	54.4669	143.33	254.663	120.985	157.334	207.189	163.225	121.769	173.949	298.88	151.425	123.486	241.509	221.503	291.978	95.5133
RD4|1011844	9420	22	3	0	Low-quality	Genome-fragment	11.52	HMM-based (lower-bound)	Virulent	8.40478	7.42628	2.13503	2.14371	0.653626	3.54308	440.12	2.19703	0	4.02596	1.9415	15.8775	1.54001	2.34218	0.241857	1.08151	2.00254	0	4.99277	0	1.85421	3.73128	2.29097	1.63907	6.46556	1.78622	2.5562	1.46381	3.34706	6.90294	10.8607	3.02211	1.38807	2.42376	1.10024	5.11967
RF2|1131977	5026	10	3	0	Low-quality	Genome-fragment	4.91	AAI-based (medium-confidence)	Virulent	87.7649	158.673	112.044	13.3929	69.216	108.906	77.1373	32.9423	96.8246	81.116	191.04	35.5449	38.966	48.837	6.64841	6.75675	55.7629	117.122	118.531	13.5452	8.68815	135.871	71.9221	21.5042	98.8092	215.378	352.934	69.5034	230.317	159.959	227.983	12.7444	212.031	233.951	109.293	83.4076
RE11|2175100	33655	48	31	0	Medium-quality	Genome-fragment	74.53	AAI-based (high-confidence)	Virulent	1.00821	3.74149	0.398395	1.00004	5.48848	3.17346	3.99659	2.76726	0	0.140858	0.271711	0.370342	3.01733	220.273	1.15082	1.71538	0.160146	5.83027	6.52153	10.3164	0.333637	9.99623	0.16031	6.19344	0	0	0	0	0.535336	0	0.810636	1.4803	0	0	0.461934	0.11023
RE6|1456462	16387	25	4	0	Low-quality	Genome-fragment	13.23	HMM-based (lower-bound)	Virulent	37.6163	13.6607	32.7283	46.6222	15.0294	26.0701	14.4848	44.2034	33.2321	34.7146	3.90621	40.3115	59.7556	11.2761	14.6909	62.3774	59.0378	49.2264	14.8287	59.2002	26.571	52.0907	5.59705	33.9196	77.1931	36.9649	43.5928	43.7563	65.1425	30.302	22.8917	19.1097	64.6322	30.6524	6.95715	51.3897
RD11|1065898	6128	5	1	0	Low-quality	Genome-fragment	7.53	HMM-based (lower-bound)	Virulent	11.0742	192.926	241.772	2.19689	82.8926	22.8751	29.6961	13.5091	23.6347	7.73592	7.4612	124.069	1.18366	1.80021	1.98284	1.10834	3.95784	1.42311	0	0	0.407186	11.4715	7.9238	0	1.52906	1.83053	3.9294	0.75006	6.61515	0.964658	7.79103	2.3228	5.33439	12.1089	3.38259	4.84307
RE12|519640	5139	8	4	0	Low-quality	Genome-fragment	14.02	AAI-based (medium-confidence)	Virulent	4.4018	8.1676	0	0	9.585	2.59785	0	0	7.8913	0	1.77942	0	7.76298	1.07333	49.0622	0	18.8781	3.39396	3.05065	0	7.52601	0	0	6.00896	0	0	0	0	3.50588	0	26.544	0	0	0	1.00839	0
RF8|1479345	5779	7	0	0	Low-quality	Genome-fragment	4.94	AAI-based (medium-confidence)	Virulent	255.409	245.734	158.928	63.4805	91.0949	211.378	197.152	136.087	196.486	228.046	400.337	86.27	89.7424	128.375	25.8881	70.5162	112.849	147.887	348.595	71.8596	50.7338	151.185	309.952	114.217	158.898	289.221	223.613	96.2382	195.631	277.21	169.952	75.7396	186.666	285.447	357.79	87.9462
RE3|1113455	5691	6	1	1	Low-quality	Genome-fragment	3.11	AAI-based (high-confidence)	Virulent	5.96227	1.22923	0	0	0	0	16.6834	0	4.07193	0	0	1.46007	45.8837	0	0	8.3541	0	183.886	33.057	84.9332	1.31536	14.9993	0	69.183	9.87886	1.97109	0	0	0	0	0	0	0	0	0	0
RF1|1739577	62639	90	7	1	Medium-quality	Genome-fragment	80.28	HMM-based (lower-bound)	Virulent	57.8712	33.9509	9.41827	39.9218	22.6572	35.2732	15.4101	92.7602	40.5096	12.1089	13.5767	26.7959	45.5085	4.62303	0.0727434	76.4967	35.6222	21.51	5.88158	25.4862	4.68064	23.0865	6.45991	16.515	135.901	61.6936	43.9514	132.375	117.999	36.3336	33.2101	83.6245	90.3871	59.0488	10.9204	126.149
RD1|523335	18053	28	11	0	Low-quality	Genome-fragment	46.08	AAI-based (medium-confidence)	Virulent	0	0	0	270.138	0.34106	0	0	0.286601	0	0	0	0	0	0	0	0	0	0	0	0	0	0	0	0	0	0	4.00145	0.509208	0	0	0	0.985578	0	0	0	0
RE6|1744066	24700	36	1	1	Low-quality	Genome-fragment	26.53	AAI-based (medium-confidence)	Virulent	11.9057	9.91272	144.665	14.3073	171.752	1.081	8.32851	0	20.1711	13.8187	0.740441	67.7859	47.4264	115.118	200.557	0	27.8213	1.76534	0	0.82686	550.72	29.6802	1.31058	2.65668	8.72519	0	1.29983	0	7.29422	1.91463	25.6804	0.57628	10.8523	0	0.839211	2.70349
RE4|1254807	7339	12	1	3	Low-quality	Genome-fragment	6.02	HMM-based (lower-bound)	Virulent	77.057	281.195	221.974	11.9235	69.6341	227.387	274.912	23.97	127.092	115.624	352.62	24.9085	26.1911	75.1579	32.4923	7.40361	58.7514	108.728	286.246	6.95716	20.2298	176.52	261.712	13.1489	46.6015	147.498	254.825	8.14182	98.1971	149.014	206.315	7.75807	52.5592	281.548	179.351	15.1647
RE11|1278607	13117	26	1	0	Low-quality	Genome-fragment	8.28	HMM-based (lower-bound)	Virulent	0	2.13328	0	0	0	0	0	0	0	2.89125	0	0	0	186.917	0	0	0	0	0	0	0	0.765608	0	0	0	0	0	0	0.68677	0	1.03995	0	0	0.870315	0	0
RF2|148802	5611	8	0	2	Low-quality	Genome-fragment	12.59	AAI-based (medium-confidence)	Virulent	175.371	235.637	157.713	128.963	77.911	227.225	166.392	249.894	224.052	134.335	259.128	157.714	95.6612	76.1856	29.2349	115.599	89.8124	108.019	202.567	122.543	51.8081	113.651	150.001	133.459	212.919	203.918	191.685	165.473	215.135	183.316	148.298	145.867	254.009	145.471	153.312	169.919
RE6|897208	24127	24	18	0	Low-quality	Genome-fragment	39.92	AAI-based (medium-confidence)	Temperate	0	0	0	0	0	0	0	0	0	0	0	0	0.300636	0	0	0	0.223389	0	1.29956	0	82.6333	1.2487	0	0.319974	0	0	0	0	0	0	0	0	0	0	0	0
RF11|608181	8211	10	0	1	Low-quality	Genome-fragment	4.93	AAI-based (medium-confidence)	Virulent	138.436	312.674	199.217	94.2754	32.2443	316.239	269.807	322.627	211.668	127.593	278.421	76.4033	105.122	28.8858	3.14464	116.631	85.0038	102.491	174.701	43.1137	10.7881	156.551	76.2205	27.2659	141.504	221.317	270.774	150.022	169.503	117.35	261.656	175.088	199.853	226.622	80.1522	150.452
RE12|1917440	23926	25	16	1	Medium-quality	Genome-fragment	52.91	AAI-based (medium-confidence)	Virulent	1.8909	0	1.12079	1.12535	0.772026	10.8807	1.98414	0.4325	3.63204	0.594404	0	0	13.3391	21.2095	60.5931	0.283871	23.5402	8.74776	8.19051	2.84536	7.71744	5.4565	0.901986	22.909	1.95814	1.1721	0.67094	0	0.753018	0	0.570132	0.594923	1.09301	0	0	1.24042
RE3|1477703	6605	6	0	0	Low-quality	Genome-fragment	3.56	AAI-based (medium-confidence)	Virulent	3.42481	2.11826	2.02997	0	0	2.02125	7.18736	0	1.75423	1.43545	2.76895	1.25802	48.3197	0	0	2.05659	0	163.721	40.3504	75.2416	2.64446	6.84196	0	81.8169	7.09318	1.69833	4.86084	0	0	0	0	0	0	0	0	0
RD1|590342	5436	14	5	0	Low-quality	Genome-fragment	9.03	HMM-based (lower-bound)	Virulent	0	2.57379	2.46651	93.4898	2.83166	2.45591	17.466	70.4334	5.32868	1.74414	1.6822	60.378	8.67318	1.52203	0.838222	138.062	5.9489	1.60427	0	25.6733	3.44266	1.8474	2.9775	6.39074	17.2371	8.25422	79.733	192.784	47.2293	34.7987	26.3485	318.147	12.0269	7.3502	7.62638	210.877
RD2|1209766	9356	20	2	1	Low-quality	Genome-fragment	7.72	HMM-based (lower-bound)	Temperate	7.85782	5.98166	0	8.27379	156.956	7.13464	1.69134	0	21.6724	0	1.95478	0	8.52799	0	0	0.725939	0.576069	2.79632	1.67564	39.2927	2.53364	4.29349	0	7.42626	0	1.19896	0	0	2.88853	0	0	0	0	0	0	0
RD10|2132041	10975	13	1	5	Low-quality	Genome-fragment	20.5	HMM-based (lower-bound)	Virulent	453.963	365.872	190.583	179.705	138.291	317.489	342.436	331.89	274.491	354.193	558.249	178.677	184.393	225.157	25.5334	170.493	173.109	205.405	429.251	236.335	94.5803	195.359	386.392	197.66	388.037	325.537	261.82	233.692	253.629	478.839	252.312	199.407	355.634	297.49	445.261	209.236
RE1|601351	5787	5	0	3	Low-quality	Genome-fragment	1.5	AAI-based (medium-confidence)	Virulent	26.3851	26.5945	66.032	44.2005	42.5586	26.53	27.3443	53.6444	25.0274	9.01094	11.0612	93.3299	28.8283	5.71886	5.24921	150.813	22.818	4.52089	13.5453	9.41118	9.70154	43.3838	4.66151	11.3392	34.0024	23.2607	122.054	77.043	31.9114	10.215	31.8219	85.4736	9.03795	18.7405	7.16382	75.6446
RF11|1863466	5066	11	7	0	Low-quality	Genome-fragment	3.56	HMM-based (lower-bound)	Virulent	79.2578	67.6632	58.2265	7.97228	38.8925	94.8701	68.7192	27.5756	35.4508	53.3385	119.134	20.5025	34.363	26.1311	6.89573	7.37374	42.5559	37.8716	38.6826	6.71912	4.43291	83.2578	47.9244	6.85749	73.9842	169.392	245.578	44.4576	85.3536	91.0168	152.135	8.4292	92.9182	132.953	88.9943	55.6542
RE8|1092869	16115	24	4	0	Low-quality	Genome-fragment	32.69	AAI-based (medium-confidence)	Virulent	25.9687	0.868204	0	0	0	0	0	0	0	0	0	1.54686	0	0	0	0	0	0	0	0	0	1.86953	345.844	0.239529	0	0	0	0	0	0	1.69295	0	0	0	0	0.460415
RE12|1812372	5424	12	2	0	Low-quality	Genome-fragment	5.18	AAI-based (medium-confidence)	Virulent	2.08526	0	0	0	0	0	0	0	0	0	0	0	4.68051	0	40.7437	0	8.44625	0	0	0	3.91031	0	0	1.42331	0	0	0	0	0	0	0	0	0	0	0	0
RE3|695441	7532	12	2	0	Low-quality	Genome-fragment	17.74	AAI-based (high-confidence)	Virulent	0	0	0	0	0	0	0	0	0	0	0	0	0	0	0	0	0	248.355	2.08143	0	0.331285	0	0	0	0	0	0	0	0	0	0	0	0	0	0	0
RD9|2203052	7787	10	0	0	Low-quality	Genome-fragment	12.81	AAI-based (medium-confidence)	Virulent	29.0495	22.4591	7.74828	50.5688	83.8139	16.2872	26.4176	16.611	55.0542	14.0019	8.22025	145.121	134.599	5.31255	0.292576	12.2109	3.46071	39.757	41.2719	135.509	38.6126	42.5583	2.07855	91.7043	47.5303	0	5.15375	0.590262	2.89211	28.8473	9.6347	7.76872	56.252	1.46602	28.6158	28.5845
RD12|28667	10039	6	2	0	Low-quality	Genome-fragment	13.78	HMM-based (lower-bound)	Virulent	25.9129	288.491	355.267	8.38139	88.012	17.9529	22.0678	22.1618	10.9646	9.44431	0.910892	145.674	1.44505	0.549441	3.02592	3.04447	3.75813	7.81822	0	0	0.621386	18.0062	10.7485	2.30701	5.60022	3.35217	21.5872	2.74711	11.2167	3.53307	8.83219	4.96259	7.16367	21.0374	12.905	12.9338
RD2|787573	5282	10	1	0	Low-quality	Genome-fragment	2.86	HMM-based (lower-bound)	Virulent	0	5.29765	0	0	138.717	0	0	0	0	0	0	0.786562	0	0	0.287554	0	70.9171	0	0	0	3.07062	0	0	0	0	0	0	0	0	0	0	0	0	0	0	0
RE12|497417	19214	23	8	0	Low-quality	Genome-fragment	16.99	AAI-based (medium-confidence)	Virulent	1.17731	0	1.39565	0	10.2545	0	0.823575	1.07713	0.301517	1.48035	0	0.864915	2.26505	3.44489	41.3825	0	1.82331	0.907754	0	1.06295	21.6226	7.31731	0	0	0	0	0	0	0	0	0	0	0	0	0	0
RE6|215048	6846	10	5	0	Low-quality	Genome-fragment	11.53	AAI-based (high-confidence)	Virulent	29.7382	34.7427	1.95851	62.4358	45.4187	47.7773	79.7449	24.1846	64.314	4.84721	8.01441	33.3777	46.0889	25.3796	1.77489	15.8735	20.4692	117.831	12.595	53.2016	63.9664	150.358	7.09276	50.1812	10.2652	4.09637	3.51729	4.02837	3.94757	6.90789	10.959	11.9553	3.81994	5.00259	10.5974	10.8378
RD1|2447055	50011	68	21	0	High-quality	High-quality	100	AAI-based (medium-confidence)	Virulent	0	1.11904	0	205.258	0	0.266948	0	0	0	0	1.46279	0	0	0	0	0.135808	0.0538852	0	0	0	0	0	0.215762	0	0	0.2243	0.641975	0	0	0	0	0	0	0.913072	0	0
RD5|431780	5018	6	1	0	Low-quality	Genome-fragment	10.08	AAI-based (medium-confidence)	Virulent	446.286	421.016	284.565	174.385	171.782	319.259	416.259	303.14	340.581	316.479	517.541	237.62	245.01	224.239	43.5862	159.037	211.593	224.189	501.436	214.355	103.678	233.15	431.145	191.539	381.862	394.557	335.902	252.81	324.933	554.859	354.753	176.579	389.56	381.061	424.443	236.575
RE6|1721741	6538	15	2	0	Low-quality	Genome-fragment	5.89	HMM-based (lower-bound)	Virulent	0	0	0	0	0	0	0	0	0	0	0	0	0	0	0.232312	0	0.824366	0	0	0	51.3321	0	0	1.18079	0	0	0	0	1.37785	0	0	0	0	0	0	0
RE6|1668275	5085	10	1	1	Low-quality	Genome-fragment	1.73	HMM-based (lower-bound)	Virulent	13.3456	12.3815	9.22869	97.9574	8.47594	5.25087	17.1156	2.03501	14.8109	1.86453	0	4.08517	3.5661	0.542364	3.13629	0	1.05992	0	0	2.67761	66.4906	1.97492	7.42706	0	0	2.206	7.89229	18.0782	0.885778	8.13765	2.68259	2.09943	3.85713	1.12251	7.1337	1.45911
RF5|699627	7203	8	3	0	Low-quality	Genome-fragment	15.76	AAI-based (medium-confidence)	Virulent	12.5619	16.5104	8.37649	53.7342	17.5235	11.1206	9.88598	208.31	16.8902	17.1116	27.9297	92.8632	23.1611	11.8694	0.948891	95.7069	5.98606	6.65894	9.79423	301.026	5.02304	7.66814	19.4747	69.1296	31.8711	10.1227	23.4007	71.4693	18.1343	14.7724	6.62827	239.113	15.4301	13.4715	18.7054	82.4055
RE6|411691	9146	13	3	0	Low-quality	Genome-fragment	15.54	HMM-based (lower-bound)	Virulent	1.23665	4.58925	0	0	15.1472	0	0	0	3.80057	0	0	0	0.793073	0	1.74372	0	7.3662	0	3.42823	0	62.8857	1.09802	0	0	0	0	0	0	0	0	1.49147	0	0	0	0	0
RD10|599738	47766	60	16	2	Medium-quality	Genome-fragment	72.69	HMM-based (lower-bound)	Virulent	262.953	75.1312	49.6841	633.654	28.0363	47.2346	30.9752	64.8835	150.273	11.711	0.574328	311.818	92.0993	7.44822	46.727	92.0686	20.0847	14.4233	5.41547	37.3414	23.7948	20.1834	80.986	13.8186	206.367	60.472	79.4815	63.3172	75.7203	41.4589	46.835	63.1008	85.1344	71.46	36.995	101.199
RE6|901584	6501	9	5	0	Low-quality	Genome-fragment	18.84	AAI-based (medium-confidence)	Virulent	0	110.836	81.4667	0.51771	40.7257	7.18753	13.3876	0	8.91146	3.64603	0	15.3378	3.9051	31.8173	9.57902	0	20.3119	1.34145	13.2634	0	48.1699	55.6113	13.2785	11.8751	0.720666	0.862751	2.4693	0	0	0	0	0	0	2.63404	1.59425	1.1413
RE3|978198	7283	14	2	1	Low-quality	Genome-fragment	7.96	HMM-based (lower-bound)	Virulent	35.7188	99.8953	64.4348	15.7121	21.5581	101.736	87.9965	12.0772	66.0232	36.4509	94.1691	18.825	29.3803	29.9157	3.54532	3.73027	44.0323	74.8386	65.6539	10.7497	4.28264	85.4914	82.2285	27.5601	50.1763	71.6207	126.739	18.9333	89.6754	58.4405	87.094	8.79494	60.1448	79.9412	64.0383	22.4126
RE9|2438413	7121	9	2	0	Low-quality	Genome-fragment	13.95	HMM-based (lower-bound)	Virulent	2.38248	7.85907	0	5.67162	20.3192	9.37392	13.3331	0	24.4067	2.66287	2.5683	3.50059	94.2204	11.2315	2.55952	7.15337	2.27062	17.1452	7.70545	90.8219	13.1402	41.6028	7.5765	201.646	4.60544	11.0269	4.50861	0	0	0	0	2.99834	3.67242	0	0	0
RD1|1741776	10516	11	7	0	Low-quality	Genome-fragment	23.76	AAI-based (medium-confidence)	Virulent	1.07554	0	0	272.041	0	0	0	0	0	0	0	0	0	0	0	0	0	0	0	0	0	0	0	0	0	0	4.57957	0	0	0	0	0	0	0	0	0
RE3|282460	6599	11	6	0	Low-quality	Genome-fragment	14.73	AAI-based (high-confidence)	Virulent	0	0	0	1.02004	0	8.09234	0	0	0	0	0	0	21.4339	0.83586	0	0	0.816745	222.017	15.4421	30.4335	4.34842	54.0246	4.9055	0.584938	0	0	0	0	0	0	0	0	0	0	0.785289	0
RF2|1279214	5423	11	4	0	Low-quality	Genome-fragment	9.61	HMM-based (lower-bound)	Virulent	28.1561	0	0	71.9921	0.56769	3.6927	1.45899	6.67859	0	0	3.37247	1.53222	9.36274	8.13696	0.560154	6.26211	7.45395	0.804056	1.44545	2.51072	0.460121	2.77775	15.9181	4.2707	41.4682	2.0685	94.7249	28.8174	313.955	8.72052	52.8233	71.5249	28.9338	7.36782	21.9784	54.7268
RE8|91625	5277	11	2	0	Low-quality	Genome-fragment	9.81	AAI-based (high-confidence)	Virulent	0	0	0	1.91338	0	0	0	0	2.19569	0	0	0	0	1.04526	0.143913	0	0	0	0	0	0	0	290.363	0	0	0	0	0	0	2.24045	0	2.69739	0	0	2.94606	0
RE9|2167062	15272	37	2	0	Low-quality	Genome-fragment	19.09	HMM-based (lower-bound)	Virulent	0	0	0	0	0	0	0	0	0	0	0	0	0	0.361173	0	0	0	0.571031	0	0	0.163386	0	0	244.915	0	0	0	0	0	0	0	0	0	0	0	0
RD2|109819	5511	6	0	0	Low-quality	Genome-fragment	12.78	AAI-based (high-confidence)	Virulent	0	0	0	0	126.808	0	0	0	0	0	0	0	0	0	0	0	1.95598	0	0	0	1.13193	0	0	0	0	0	0	0	0	0	0	0	0	0	0	0
RD2|589823	21814	23	3	2	Low-quality	Genome-fragment	31.53	AAI-based (medium-confidence)	Virulent	0.518494	0	3.6879	0.617151	215.645	0	5.07789	0.474374	5.046	0.434636	0.838402	5.90415	3.15888	3.28715	25.1008	0.622709	68.4399	0	2.15604	0	92.9966	0.460369	0	10.0862	1.28864	0	1.4718	3.79273	11.3565	1.08397	16.884	0.326261	0.299708	0.52333	0.475119	0.170065
RF9|1425054	78542	164	4	1	High-quality	High-quality	100	AAI-based (medium-confidence)	Temperate	41.6174	43.1087	25.692	44.8225	12.5429	41.5594	30.7248	83.0691	39.3146	21.3061	10.4785	48.8766	48.5305	16.1173	4.89256	124.523	23.6746	21.3739	14.3715	79.9166	13.1208	33.0521	10.0291	42.1671	64.8994	44.3461	34.3369	104.109	42.4944	27.6221	42.9852	91.7927	50.2769	41.5695	10.3587	73.9672
RE4|1502684	10768	7	0	6	Low-quality	Genome-fragment	10.93	AAI-based (medium-confidence)	Virulent	464.79	625.624	661.184	295.993	285.615	730.871	843.524	508.847	505.734	328.864	833.089	364.609	285.611	177.493	23.0622	399.578	341.611	286.698	576.543	73.0222	47.504	469.575	411.857	158.802	594.768	718.803	1086.79	623.635	604.015	617.054	996.978	394.584	669.083	736.288	500.984	676.637
RE7|1837489	18871	25	2	0	Low-quality	Genome-fragment	16.69	HMM-based (lower-bound)	Virulent	88.4049	27.8028	16.3417	2.31854	131.653	35.7263	77.9846	19.4666	15.3498	11.3044	15.0219	243.936	67.0726	4.82282	6.5194	0.719823	4.42692	8.78041	16.1998	17.677	15.1399	348.036	2.859	32.7275	34.0126	2.08051	37.8546	3.40995	8.83126	23.8073	24.577	4.14857	39.4951	13.9137	17.8495	57.9931
RE5|18208	6498	5	1	0	Low-quality	Genome-fragment	12.05	HMM-based (lower-bound)	Virulent	0	0	1.0317	16.0564	1.89509	0	0	1.59249	2.67467	2.18863	0	0	5.58129	0.848852	0	6.27136	0.82944	12.7497	3.61895	158.723	6.72001	4.63642	0	49.3045	2.163	0	0	1.4147	0	0	2.09926	1.09527	2.01226	0	1.59499	1.14183
RD2|1706629	5583	3	1	0	Medium-quality	Genome-fragment	86.96	AAI-based (medium-confidence)	Virulent	0	0	2.40157	0	129.584	0	0	1.85348	0	0	0	0	0	0	8.29754	0	0	0	0	0	0	0	0	0	0	0	0	0	0	0	0	0	0	0	0	0
RE12|1556664	10378	23	5	0	Low-quality	Genome-fragment	17.85	HMM-based (lower-bound)	Virulent	0	0	0	0	0.59329	0	0	0	0	0.913581	0	0	0.698925	1.06299	38.5642	0	15.8398	1.68063	6.04251	0.655985	0.480871	0	0	2.97553	0	0	0	0.885791	0	0	2.62883	0	0	0	0	0
RF11|1854554	26497	38	9	3	Low-quality	Genome-fragment	37.76	AAI-based (medium-confidence)	Virulent	213.642	199.066	68.8185	11.3047	50.6571	301.046	105.407	19.9173	230.448	260.135	305.425	28.38	59.1291	112.411	2.37886	3.8449	28.2737	144.814	89.0453	1.28464	24.3902	113.322	258.797	19.5207	185.832	312.855	93.6021	13.0101	205.346	324.83	106.309	2.55169	242.297	220.589	187.947	23.5213
RE11|3524	6382	14	1	0	Low-quality	Genome-fragment	3.82	HMM-based (lower-bound)	Virulent	1.77224	2.19228	16.8072	0	8.68293	0	0	0	0	1.48561	0	1.30198	8.52411	115.814	28.3209	0	2.11129	0.683233	3.68473	0	6.25569	5.50747	0	3.02413	0	0	1.25767	0	0	0	6.41225	0	0	0	0	0
RD9|1252405	33356	44	7	2	Low-quality	Genome-fragment	41.16	HMM-based (lower-bound)	Virulent	63.7474	61.0297	21.3042	141.563	23.5351	129.277	7.11603	22.4916	15.6314	1.70545	1.64488	96.5292	16.3092	4.13407	24.8165	21.6853	18.0163	17.3862	2.82	5.30649	15.9337	10.989	9.70481	2.08299	33.288	35.4792	21.1754	46.9889	69.6773	13.1144	9.40588	33.3919	50.1764	64.6843	15.5358	51.2715
RE10|2017255	7599	16	7	0	Low-quality	Genome-fragment	15.35	AAI-based (medium-confidence)	Virulent	4.46523	6.44412	1.76444	15.9446	27.954	8.78427	4.1648	4.08528	3.81191	8.73378	10.8304	0	204.746	2.54052	8.79455	27.7074	8.86581	38.4454	46.4192	52.8571	22.9855	85.9009	9.22989	312.397	22.1953	6.64281	8.45001	10.8876	11.8547	15.5584	12.5657	0.936578	34.4141	12.7695	8.18338	16.5986
RE6|44945	5300	6	2	0	Low-quality	Genome-fragment	12.53	AAI-based (medium-confidence)	Virulent	0	0	0	0	0	0	0	0	3.27925	0	0	0	14.37	0	2.43591	6.40744	1.01693	28.7951	26.6218	10.2759	1302.23	5.68442	18.3234	8.73963	5.30383	3.17476	7.57213	0.86724	0	4.46145	2.57377	4.02852	4.93421	0	0	2.09988
RE6|907128	26950	39	6	0	Low-quality	Genome-fragment	46.01	AAI-based (medium-confidence)	Virulent	125.065	63.5959	30.8458	60.0694	36.5546	45.3267	19.6701	199.281	80.8273	55.0575	62.094	111.92	56.5204	38.8872	0.958093	156.503	36.698	41.5815	40.4294	80.9612	80.5513	76.9489	143.139	79.2053	74.5783	45.3694	77.733	92.439	51.3092	86.423	34.6719	111.047	85.392	42.5714	32.6887	103.103
RD12|1279688	6070	12	2	0	Low-quality	Genome-fragment	2.57	HMM-based (lower-bound)	Virulent	32.6083	205.141	428.525	5.5447	46.6605	52.7855	72.9945	12.7858	9.54422	0.780984	0	56.125	23.3018	0.908705	7.50672	8.95142	0	21.5506	0	0	0	38.8794	15.999	0	25.4706	19.4042	56.8596	1.51445	10.3886	6.81713	119.106	2.34499	21.5414	40.4353	22.1969	9.16752
RE1|408260	8489	7	1	0	Low-quality	Genome-fragment	5.48	HMM-based (lower-bound)	Virulent	27.9796	15.6574	0	86.0339	1.45062	0	0	162.126	13.6491	2.23375	2.15442	85.1577	12.3896	1.29953	0	156.016	6.98395	4.10922	0	32.8802	1.17575	0	0	48.1989	17.1088	6.60707	1.89102	118.578	8.48944	0	0	72.9396	24.6449	6.05155	0	123.674
RF5|997519	6076	2	2	0	Low-quality	Genome-fragment	13.48	AAI-based (medium-confidence)	Virulent	0	0	0	0	0	0	0	0	0	0	0	0	0	0	0	0	0	0	0	0	0	0	0	1.90586	0	0	0	139.192	0	0	0	118.891	11.8361	0	0	21.9803
RE12|133936	18233	33	6	1	Low-quality	Genome-fragment	20.14	AAI-based (medium-confidence)	Virulent	0	0	0	0	1.35077	0	0	0	0	0	0	0	0	0	48.6071	0	0.443402	0	0	0	0	0.275393	0	0.211704	0	0	0	0	0	0	0	0	0	0	0	0
RD7|1110595	5793	5	1	0	Low-quality	Genome-fragment	8.15	HMM-based (lower-bound)	Virulent	3.90486	36.2276	0	1.74295	5.31431	53.0049	64.1926	1.78629	28.0016	225.04	12.6283	0	0	1.42823	0	0	0	3.0108	102.837	0	0	1.73355	17.6954	0	2.42623	7.74555	2.77109	0	4.66513	10.2044	4.70947	0	0	0	8.9455	0
RE6|1455172	12122	16	6	0	Low-quality	Genome-fragment	23.09	AAI-based (medium-confidence)	Virulent	1.8661	1.15419	1.65913	0	8.88882	0	0	0	1.91168	17.5982	0	0.685468	29.6193	30.2593	3.44569	0	1.11155	0	0	0.280804	73.795	0	0	0	0	0	0	0	0	0	0	0	0	0	0	7.34491
RE5|466503	10370	13	3	0	Low-quality	Genome-fragment	26.06	AAI-based (medium-confidence)	Virulent	45.8089	14.8411	6.46479	73.3494	58.1873	15.4488	43.4897	10.4777	118.437	2.28571	12.3454	6.41021	82.5368	6.11689	1.7576	7.20451	11.6941	74.8457	34.0153	239.291	45.4773	33.4104	2.08109	199.886	18.0715	3.24518	4.64404	4.87561	10.4243	2.2802	2.63085	8.92206	10.7178	2.20172	0	1.07323
RF7|862606	10042	8	0	7	Low-quality	Genome-fragment	3.19	AAI-based (medium-confidence)	Virulent	101.368	365.73	343.811	13.7414	80.3215	208.724	354.555	28.338	156.92	158.617	490.824	34.7528	14.0851	101.616	44.8458	13.1888	66.5528	121.58	397.318	10.169	19.8784	268.013	287.975	19.9881	74.1807	275.913	333.303	17.8509	141.737	251.951	358.616	7.79602	94.402	344.456	226.544	28.0765
RE12|644177	5140	8	3	0	Low-quality	Genome-fragment	15.87	AAI-based (medium-confidence)	Virulent	224.448	21.776	3.91283	14.4054	14.9736	54.5442	60.0333	27.1786	77.7705	23.0573	10.6745	19.399	157.346	11.8043	26.7426	17.1779	27.2631	39.8713	53.376	162.249	28.1564	47.8678	9.4469	109.642	21.8757	9.82076	92.1325	13.4135	10.5156	19.5514	21.2311	38.0776	67.4134	5.55249	21.1721	51.9659
RD6|1392009	12163	24	1	0	Low-quality	Genome-fragment	11.06	HMM-based (lower-bound)	Virulent	0.464952	0	0	0	1.01244	0	0	0	341.99	2.33852	0	0	0	0	0.249751	0	0	0	0	0	11.4884	5.77961	0	1.90414	0	0	0	0.377898	0	0	0	0	0	0	0	0
RF5|2111733	15767	17	2	0	Low-quality	Genome-fragment	18.37	HMM-based (lower-bound)	Virulent	44.4756	0	0	2.56153	0.390509	0	0	3.60969	106.923	3.00664	1.15995	6.85102	0.69006	0.874586	0.288995	3.87689	2.22192	0.553104	3.97724	1.94299	5.61812	1.59233	8.55462	1.22408	2.37714	1.77863	2.54533	6.70492	1.14269	4.12416	1.73032	325	2.07326	4.34423	3.61536	1.17644
RD7|2328306	13237	18	6	3	Low-quality	Genome-fragment	24.75	AAI-based (medium-confidence)	Virulent	128.168	119.438	57.7362	6.10223	25.5831	162.883	56.1861	10.1627	119.044	161.159	169.252	26.6784	33.7	60.0046	1.20481	1.79585	15.4724	83.3406	52.1116	2.31436	15.4574	70.1767	127.575	11.6643	112.198	160.589	54.5729	12.5005	123.519	146.033	54.6175	1.34416	129.897	144.025	120.578	12.8919
RE6|850779	7218	9	1	1	Low-quality	Genome-fragment	2.56	HMM-based (lower-bound)	Virulent	3.13395	15.5069	13.003	2.7977	82.3173	0	2.19232	0	4.81574	53.1984	0	5.75591	17.5859	108.513	47.4512	0	46.2956	0	11.9458	0	73.6333	6.95655	0	1.06955	0.649078	0	0	0	1.24804	0	18.8986	0	0	9.48954	1.43589	3.08378
RF2|1106181	7455	5	2	1	Low-quality	Genome-fragment	6.74	HMM-based (lower-bound)	Virulent	23.516	10.3221	4.4963	272.682	2.47773	48.3513	212.262	90.224	48.9578	49.5995	55.1979	60.7449	17.9998	2.21965	0.203737	180.388	9.76003	19.8864	9.46316	10.0451	3.68177	0	86.8447	1.03555	252.006	202.381	11.8432	150.438	273.695	145.902	74.1059	119.334	128.038	120.208	59.7804	91.0653
RD7|956128	6509	7	0	0	Low-quality	Genome-fragment	13.28	AAI-based (high-confidence)	Virulent	0	5.37375	1.02996	0	0.472973	0	0	0	0.890051	169.696	0	0	13.3725	22.4566	6.6504	0	6.21029	4.01942	1.20428	0	11.6922	10.8	2.48666	6.52328	1.43956	0.861691	1.23313	0	0.691993	0	12.5743	0	0	0.876933	3.18459	0
RE9|1923529	11517	21	4	0	Low-quality	Genome-fragment	33.94	AAI-based (medium-confidence)	Virulent	1.4731	0.607411	0	3.50678	2.40577	0	0	0.898498	0.503025	0.82323	0.793995	0.721476	103.603	1.67626	0.263759	0.884591	1.87191	16.6586	1.36123	80.391	12.9994	11.3356	2.34229	142.107	3.25435	0	1.39384	1.19728	0.782179	0	0	0.617961	0	1.48683	0	0
RD2|655702	17252	21	1	0	Low-quality	Genome-fragment	31.48	HMM-based (lower-bound)	Virulent	3.278	13.3812	3.10873	12.6806	215.922	8.51227	2.29309	0.599815	1.34323	0	0.530051	3.61229	1.68176	0.639444	2.11295	0.984217	1.71826	0.758242	0	0.78922	0.795491	33.4711	0.625461	0	4.07348	4.8766	1.86099	5.86136	6.00488	2.39856	0.395345	3.30028	2.27376	4.63201	0.901135	4.51574
RF1|1195271	10767	4	2	0	Low-quality	Genome-fragment	23.22	AAI-based (high-confidence)	Virulent	0	0	0	0	0	0	0	0	0	0	0	0	0	0	0	0	0	0	0	0	0	0	0	1.79252	0	0	0	112.7	0	0	0	87.5834	4.85768	0	0	18.2613
RE5|884977	5436	10	2	0	Low-quality	Genome-fragment	4.18	HMM-based (lower-bound)	Virulent	26.0082	16.7296	0	39.6248	67.9599	9.82365	27.6544	12.3734	78.8645	6.97656	0	3.05711	72.7213	1.01469	0.558815	3.12357	19.8297	44.1173	25.9558	180.966	34.6561	18.474	0	110.773	16.3753	3.09533	0	0	4.14292	3.26237	0	1.96387	6.01345	0	1.9066	0
RE6|915041	9979	20	6	0	Low-quality	Genome-fragment	0.97	HMM-based (lower-bound)	Virulent	30.0357	0	47.6985	0	62.9352	0.668921	0	0	12.7722	0	0	3.33069	0	0	0	1.36124	0	14.8565	0	0	122.899	0	5.40658	4.64175	3.75593	0	0	0	4.06229	3.55432	0	0	0	0	2.07721	0
RF1|1174245	7637	6	0	0	Low-quality	Genome-fragment	4.58	AAI-based (medium-confidence)	Virulent	142.917	92.5168	167.665	237.097	29.0242	99.6424	151.259	253.382	114.547	113.595	83.8171	170.276	79.3064	24.5566	9.34744	156.524	65.2805	58.2376	58.505	72.2054	10.292	82.1861	34.6165	60.1467	155.821	96.2087	220.709	212.455	101.443	73.5348	98.2394	210.613	162.654	106.132	49.5345	168.075
RD9|470267	9778	10	2	0	Low-quality	Genome-fragment	7.78	HMM-based (lower-bound)	Temperate	50.3174	15.7396	46.6221	226.831	21.4096	21.8455	6.47337	38.0986	143.382	4.8482	0	273.207	47.8469	2.82054	8.23272	55.2214	5.78767	0.445939	0	21.5834	7.52807	4.62172	9.9319	18.5539	28.2694	21.7971	35.2974	54.9985	31.7845	6.04564	2.0926	35.3014	48.1411	26.269	3.70985	71.3275
RE6|585880	6080	11	2	1	Low-quality	Genome-fragment	7.38	HMM-based (lower-bound)	Virulent	0.930134	18.4093	14.3342	1.10712	12.6586	0	0	0	0	0	3.00804	0	0	9.07211	294.154	0	15.5131	0	0	0	56.0197	0	0	0	0.770567	0	1.32014	1.51196	0	0.972274	22.4358	0	0	1.87762	0	1.22033
RE7|430987	5487	7	3	0	Low-quality	Genome-fragment	7.06	HMM-based (lower-bound)	Virulent	59.7781	1.27493	245.581	10.4275	54.4236	34.0632	243.693	23.5739	32.7307	77.7568	19.9988	505.036	4.62677	9.04731	10.934	0	15.2251	2.38403	2.85717	0.620359	2.27377	271.789	6.88292	23.2149	28.1769	2.04438	20.4794	1.67537	0	116.354	149.163	20.1047	95.321	8.32216	172.832	2.70442
RE6|466935	5943	2	1	1	Low-quality	Genome-fragment	2.41	HMM-based (lower-bound)	Virulent	13.3221	7.06265	2.25609	3.96423	34.1892	11.232	17.3073	3.48242	25.3453	6.38139	0	11.1852	48.2099	23.2031	19.8068	5.14277	13.6035	25.6796	18.4656	8.01863	65.0785	29.5715	9.07829	85.7346	0	13.2126	0	1.54682	0	9.94687	12.6242	2.39511	2.20018	0	0	0
RF5|1234799	5763	11	6	0	Low-quality	Genome-fragment	15.8	AAI-based (high-confidence)	Virulent	29.4389	14.5665	17.4492	20.4402	33.6544	34.7484	46.6789	43.992	24.1263	36.1939	6.347	77.8585	46.5691	11.0068	5.27107	5.89267	9.81986	22.6986	36.7245	36.6202	10.1749	338.06	15.9151	54.9229	191.857	23.3576	32.0334	7.97565	13.2867	38.9787	67.4593	152.517	30.6301	12.8758	38.6659	31.5426
RF2|1438439	9730	16	6	0	Low-quality	Genome-fragment	22.43	AAI-based (high-confidence)	Virulent	0	6.4707	3.44501	0.691805	9.80843	1.37208	2.43949	0	1.19082	3.8977	0	0.426991	3.35463	0	0.936604	1.04705	15.7869	1.34442	0	1.39935	0.64112	0.516058	0	2.38027	174.305	215.588	75.8925	123.767	89.8058	160.392	89.0239	100.575	192.842	206.496	47.4007	136.496
RE9|2111227	5393	6	2	0	Low-quality	Genome-fragment	12.66	AAI-based (high-confidence)	Virulent	8.38897	0	1.24309	18.7222	37.6759	4.95099	8.80261	1.91878	10.7423	6.15316	6.78246	3.08149	119.03	7.15945	1.12654	22.669	11.9927	67.9164	21.8023	122.447	20.1266	43.7601	6.00248	229.038	34.7491	8.32004	0	1.70457	20.8798	9.86516	7.58816	1.31968	32.7316	10.584	5.76539	8.25468
RF8|1553154	18700	39	5	0	Low-quality	Genome-fragment	18.01	HMM-based (lower-bound)	Temperate	0	0	0	0	0.32926	0	0.846212	0	0	0	5.86809	0	0	0	0	0	0.864658	0	5.86851	0	0	0	7.50138	0	29.0623	109.176	128.767	0.983181	52.9904	61.9593	132.762	0	3.49616	64.1001	307.325	4.36446
RE10|1402937	6194	3	1	0	Low-quality	Genome-fragment	10.08	AAI-based (medium-confidence)	Virulent	18.2603	14.6823	0	3.26022	30.8156	8.62146	8.94165	0	10.2885	9.18419	19.1924	2.683	153.992	3.56205	3.67822	7.12742	0	55.6137	41.7623	64.2973	16.1139	8.91728	0	112.796	0	2.71654	0	0	0	1.90876	0	0	0	0	0	3.5936
RF5|302569	10203	10	5	0	Low-quality	Genome-fragment	21.83	AAI-based (medium-confidence)	Virulent	0	0	0	0	0	0	0	0	0	0	0	0	0	0	0	0	0	0	0	0	0	0	0	1.13496	0	0	0	134.697	0	0	0	114.397	5.1262	0	0	24.3611
RF10|2317019	16794	20	6	0	Low-quality	Genome-fragment	29.51	AAI-based (medium-confidence)	Virulent	15.49	16.2455	16.766	170.346	2.01646	54.4538	160.183	69.3194	44.1555	34.4379	29.9479	42.3032	7.77433	3.61285	0.135661	160.961	6.57907	15.5784	12.6023	7.70207	2.823	0.59798	38.5511	1.37907	321.375	144.944	11.4705	106.192	174.868	110.527	30.8656	98.3183	83.3092	110.461	37.0284	67.3744
RF2|1068649	9438	21	1	3	Low-quality	Genome-fragment	6.03	HMM-based (lower-bound)	Virulent	139.013	48.9199	9.94446	41.7227	40.1214	58.703	20.1197	94.8402	139.954	54.2469	141.459	62.0684	51.8762	26.5915	0.965581	83.4773	47.1128	22.6382	63.1211	20.5576	17.0526	24.4731	67.4546	33.9458	181.683	120.637	65.4839	157.303	212.849	112.742	115.626	82.5724	175.949	111.28	91.1457	176.881
RD2|233345	6964	12	3	0	Low-quality	Genome-fragment	11.55	AAI-based (high-confidence)	Virulent	34.9187	26.1178	1.92533	38.6632	80.0148	6.70967	24.9951	12.6304	24.1251	10.2109	9.19172	103.209	81.7627	5.14833	0.436203	11.2158	2.70878	27.5499	10.1304	86.5152	34.039	38.9355	8.52204	62.6336	37.0014	8.05391	4.61026	4.62013	1.94034	23.7679	2.93818	5.10989	30.0417	6.5571	37.2065	22.9065
RE12|1880582	5119	2	2	0	Low-quality	Genome-fragment	8.99	AAI-based (medium-confidence)	Virulent	2.2095	0	0	0	12.0281	0	0	0	0	5.55644	0	1.62321	4.95938	2.69381	42.7263	0	1.05288	0	0	0	18.523	1.96181	2.10792	0	0	0	0	0	0	0	0	0	0	0	0	0
RE3|1721176	6724	19	3	0	Low-quality	Genome-fragment	8.1	HMM-based (lower-bound)	Virulent	24.3904	5.20193	0	2.00216	16.0247	63.5352	47.0677	0	3.44637	35.9562	46.239	8.03243	71.7362	33.223	12.9885	2.02019	6.81328	245.126	307.764	4.04986	16.3281	44.0591	17.6524	28.1291	23.69	38.3704	0	0	5.35893	14.0664	2.0287	1.05846	1.94462	0	8.4776	0
RF5|563527	7729	11	3	1	Low-quality	Genome-fragment	17.08	AAI-based (medium-confidence)	Virulent	14.6338	5.43063	2.60214	43.981	5.1781	10.3638	6.14213	44.1822	11.9929	7.36018	1.18313	48.9158	24.8695	1.07048	1.3756	88.7541	16.3874	13.5398	2.02837	35.2326	2.42131	30.5341	4.88635	22.9733	20.6096	14.5135	42.5779	89.7984	12.8208	6.11869	6.17718	95.7658	31.2977	19.2013	2.68191	104.636
RE12|388790	9672	21	4	0	Low-quality	Genome-fragment	8.57	HMM-based (lower-bound)	Virulent	0	0	0	0	0.636597	0	0	0	0	0	0	0	0	0	47.9747	0	0	0	0	0	1.8059	0	0	0	0	0	0	0	0	0	0	0	0	0	0	0
RE6|235951	15301	13	0	10	Low-quality	Genome-fragment	10.23	AAI-based (medium-confidence)	Virulent	16.6319	96.0111	117.422	3.07946	130.982	17.014	22.7522	2.02889	42.406	13.3223	5.97637	14.1193	14.9326	12.2566	66.9048	1.77554	66.7504	23.6529	28.1763	0	89.9368	44.9585	11.2834	32.0385	20.2087	6.96465	15.2125	2.10278	32.6752	19.3171	77.1156	1.16284	16.2367	23.1288	12.8698	9.21326
RD7|693003	5061	5	0	3	Low-quality	Genome-fragment	0.5	AAI-based (medium-confidence)	Virulent	299.466	279.214	245.058	128.348	60.8295	221.582	298.599	219.8	286.176	300.676	435.45	122.315	111.79	123.7	19.8073	118.096	105.962	251.578	416.636	109.63	37.717	171.641	318.746	120.506	203.657	269.3	239.477	95.3604	171.766	320.041	206.192	120.235	232.525	201.882	246.768	121.681
RE6|1942694	5132	10	1	0	Low-quality	Genome-fragment	10.16	HMM-based (lower-bound)	Virulent	0	0	0	0	0	0	0	0	0	0	0	0	0	0	0	0	1.05021	0	0	0	74.6334	3.91367	0	0	0	0	0	0	0	0	0	0	0	0	0	0
RE6|781232	5573	14	2	0	Low-quality	Genome-fragment	2.91	HMM-based (lower-bound)	Virulent	13.1918	0	74.5823	0	21.544	1.19777	2.83943	0	40.5419	1.70126	0	0	0	0	0.136269	1.21871	0	14.0835	1.40654	0	62.6832	1.80199	0	1.38525	5.88468	0	0	3.29903	0	0	0	0	0	0	0	1.33134
RE9|1161119	6878	11	5	0	Low-quality	Genome-fragment	15.66	AAI-based (high-confidence)	Virulent	4.93331	6.10255	16.5699	26.424	10.7424	3.88204	17.2552	6.01803	30.3228	8.27084	2.65904	7.85258	169.788	4.81173	1.21456	2.4687	7.05253	48.1812	33.0504	7.42347	1.45114	7.30044	2.35325	158.823	2.72466	0.815462	16.3377	0	2.61947	3.43787	20.8244	15.5214	10.456	0	12.8084	16.1811
RE2|95432	5058	3	1	0	Low-quality	Genome-fragment	11.88	AAI-based (medium-confidence)	Virulent	0	38.7259	78.1999	4.65785	29.2155	1.31972	0	0	30.9253	6.5607	10.8475	2.46419	1.43405	0.545259	27.6265	3.357	80.4513	1.72416	4.64926	0	10.1132	32.7602	0	6.86834	3.70506	1.10889	98.3868	6.36113	4.45253	2.33745	14.833	0	31.0217	12.4135	17.4172	3.66725
RD4|1437572	6578	5	0	4	Low-quality	Genome-fragment	3.38	AAI-based (medium-confidence)	Virulent	511.531	620.007	520.787	438.484	247.11	699.178	554.495	706.332	505.53	459.067	861.897	527.38	409.647	267.491	75.0424	398.551	280.219	401.04	703.071	416.562	157.802	318.312	490.475	454.187	631.036	591.741	649.145	588.346	549.157	557.173	542.28	455.5	628.14	610.017	440.378	526.747
RD1|2505973	6210	7	2	0	Low-quality	Genome-fragment	8.84	HMM-based (lower-bound)	Virulent	0	0	0	189.147	0	0	0	0	0	1.52675	2.94507	0	0	0	0	0	0	0	0	0	0	0	0	0	0	0	0	0	0	0	0	0	0	0	0	0.59739
RE10|1707235	5628	10	1	0	Low-quality	Genome-fragment	9.64	AAI-based (medium-confidence)	Virulent	30.1451	13.6729	0	11.3623	32.2737	16.6049	11.2467	1.83866	13.3819	16.0041	25.997	2.21462	155.947	5.39039	2.96863	12.068	3.83063	55.7833	48.7478	89.5129	14.4092	2.67657	3.83456	102.193	3.32981	3.98631	0	0	0.800316	0	0	0	0	0	0	0
RE12|311811	8648	10	0	8	Low-quality	Genome-fragment	14.52	AAI-based (medium-confidence)	Virulent	0	0	18.605	0	32.3949	0	0	0	0.669905	3.28902	0	0	11.323	13.0753	31.8771	0	11.2182	2.01683	0.906412	1.57443	50.9262	1.16125	0	1.78539	0	0	0	0	0	0	7.88678	0	0	0	0	0
RE12|204054	22699	32	3	1	Low-quality	Genome-fragment	19.23	HMM-based (lower-bound)	Virulent	0	0	1.18137	0	0.271253	0	0	0	0	0.83538	0	0	0	0	57.1437	0	0	0	0	0	0	0	0	0	0	0	0	0	0	0	0	0	0	0	0	0
RF4|2166313	7617	8	6	0	Low-quality	Genome-fragment	8.13	AAI-based (high-confidence)	Virulent	34.1525	56.0232	33.4451	4.41858	21.017	51.7047	30.1235	11.5476	27.3809	29.2513	70.8313	6.54528	16.1886	10.5002	2.59225	2.22919	28.3035	24.6156	31.9021	7.59701	3.11209	58.6701	41.7905	2.53381	51.6665	87.6251	134.881	22.3271	66.2292	65.191	108.347	8.40929	84.1154	76.4358	59.8696	29.2225
RF2|1335014	16892	17	3	1	Low-quality	Genome-fragment	23.28	HMM-based (lower-bound)	Virulent	43.5222	19.8784	6.34997	29.4881	22.9636	33.5892	12.6466	65.8543	24.0074	10.945	7.57887	19.6761	31.3463	4.24496	0.0899159	54.6825	24.2492	15.488	6.96068	18.5389	2.95434	17.8353	5.74912	14.6247	93.468	53.7898	36.1124	83.2636	80.527	34.6454	16.1508	64.463	53.0241	45.2798	6.44238	90.2631
RE3|779130	10299	22	1	0	Low-quality	Genome-fragment	16.08	HMM-based (lower-bound)	Virulent	9.88386	10.8679	0	1.30717	9.56545	43.4252	38.4119	2.00952	0	17.4912	32.8522	1.6136	67.9636	22.2262	11.2819	0	9.41981	191.368	215.394	1.32203	14.7791	42.4165	8.90561	37.8542	10.4628	39.2106	3.11737	0	2.62405	6.88776	2.64899	0	0	0	5.03168	0
RF3|684369	5904	14	1	0	Low-quality	Genome-fragment	13.44	AAI-based (medium-confidence)	Virulent	0	3.55465	0	0.57006	3.12864	0	0	0.876355	0	0	0	0	0.614282	0	0.385889	0	5.93379	0	5.31074	1.15309	0	0	0	2.61518	122.998	128.249	39.4253	89.5296	34.3306	229.288	68.1587	71.7251	204.861	129.551	34.2315	93.6244
RE2|2051635	7374	10	1	0	Low-quality	Genome-fragment	12.5	AAI-based (high-confidence)	Virulent	0	0	0	0	0	0	0	0	0	0	0	0	0	0	0	0	143.989	0	0	0	0	0	0	0	0	0	0	0	1.22164	0	0	0	0	0	0	0
RE12|1421791	5693	5	2	0	Low-quality	Genome-fragment	14.86	AAI-based (medium-confidence)	Virulent	0	0	0	0	0	0	1.38979	0	0	0	0	0	0	0	30.6813	0	0	0	0	0	0	0	0	0	0	0	0	0	0	0	0	0	0	0	0	0
RE10|282742	5316	4	3	0	Low-quality	Genome-fragment	10.8	AAI-based (high-confidence)	Virulent	64.8924	34.2145	0	10.1298	74.1269	40.1816	43.1622	1.94658	44.6815	32.1032	46.4447	10.1599	145.997	2.07518	1	3.19408	2.53466	109.092	44.2362	65.312	25.816	26.4475	2.02981	110.369	7.9318	5.27534	0	0	0	1.11201	0	0	1.22984	0	0.974817	0.697854
RE8|196616	6382	8	3	0	Low-quality	Genome-fragment	7.47	HMM-based (lower-bound)	Virulent	0	0	1.05045	0.527363	6.271	0	4.959	0	0	0	0	0	0	56.6104	0.951964	0	1.68903	6.1491	11.0542	0.533361	11.9249	18.8828	174.994	8.46758	0	0	0	0	0	0	0	0	0	0	0	0
RD1|156896	9284	23	1	0	Low-quality	Genome-fragment	6.65	HMM-based (lower-bound)	Virulent	0	3.01402	0	171.834	0.663201	2.15699	0	0.557303	0	0.510617	0	0.895006	0	0	0	5.85255	0	0	0	0.733285	1.88137	0	0.581132	0.831539	7.06491	0	2.59364	9.9017	2.42578	1.9102	1.4693	3.83297	11.9715	25.8223	8.37267	2.39754
RE12|56961	14575	28	2	1	Low-quality	Genome-fragment	22.72	HMM-based (lower-bound)	Virulent	6.98414	63.3559	326.115	1.38551	6.75915	48.5467	333.312	4.96988	22.2591	29.5981	129.873	3.99071	3.23481	7.94735	53.3034	0.465996	6.47134	30.8145	121.008	0.700633	2.9104	96.1184	58.4869	0.529675	2.893	83.5058	269.843	3.1536	10.5072	33.2581	275.627	0.732459	13.9055	48.5617	38.7548	1.01812
RE3|175228	21384	45	1	0	Low-quality	Genome-fragment	9.64	HMM-based (lower-bound)	Virulent	0	0.654279	0	0	0	0	0	0	0	0	0	0	0	0	0	0.952846	0	267.733	0	0	0	0	0	0	0	0	0	0	0	0	0	0	0	0.533853	0	0
RD10|1001859	9200	8	3	0	Low-quality	Genome-fragment	14.15	HMM-based (lower-bound)	Virulent	319.642	113.298	85.9859	128.406	69.6027	112.462	80.8408	214.834	169.392	87.5975	138.161	136.38	105.254	82.7376	5.69572	141.375	70.0075	54.031	61.3459	101.007	25.088	78.0475	83.2742	76.7806	159.393	103.64	95.9685	148.882	83.2294	129.152	75.6185	88.9632	130.757	101.13	59.1438	99.1966
RE12|956515	34014	51	11	1	Medium-quality	Genome-fragment	54.22	HMM-based (lower-bound)	Temperate	0.332523	10.6947	51.0476	0	19.0974	0.78499	0	0	0.340644	2.64805	0	3.42004	0.213249	7.37845	63.8328	0	14.261	0	0	0	6.60232	8.26687	0	0.453931	1.92834	1.31916	5.42743	0	2.38358	1.73794	1.20312	0	2.30652	14.5996	0	0.872533
RE12|1321298	5596	8	4	0	Low-quality	Genome-fragment	12.05	AAI-based (medium-confidence)	Virulent	0	0	0	0	2.7507	0	0	0	0	11.0128	0	0	0	1.97135	27.6847	0	1.4447	0	0	0	2.00653	3.58916	0	0	0	0	0	0	0	0	0	0	0	0	0	0
RE6|1344595	9261	17	4	0	Low-quality	Genome-fragment	18.11	AAI-based (medium-confidence)	Temperate	0	0	1.44779	1.45368	7.97818	0.720782	1.70869	0	0	0	0	4.48614	5.09096	89.9354	1.31205	15.0344	11.0576	16.0084	44.86	41.901	122.593	86.7507	296.531	15.8385	0	0	0	0	0	0	0	0	0	0	0	0
RE9|1437521	5682	7	5	0	Low-quality	Genome-fragment	7.14	HMM-based (lower-bound)	Virulent	62.703	35.7041	9.43891	10.662	70.9775	37.5933	36.2045	0.910595	42.823	19.1892	38.6249	10.9678	154.464	7.76606	1.60386	5.379	2.84567	109.739	64.8392	80.2752	29.2033	31.8136	0	118.884	4.12271	1.97422	5.65044	0	0	1.04038	0	0	0	0	0	0
RE12|1080557	26903	29	8	0	Medium-quality	Genome-fragment	60.66	AAI-based (medium-confidence)	Virulent	0	20.2822	17.1942	0	17.5082	0.49624	1.47048	0	1.07671	291.803	0.679809	1.23544	6.87518	24.1932	289.003	0	20.0338	0	0.582734	0.506101	17.1123	1.49314	0.401087	0	0	0	0	0	0	0	4.56339	0	0	10.6084	0	0
RD2|542059	9658	9	2	2	Low-quality	Genome-fragment	4.62	HMM-based (lower-bound)	Virulent	97.7863	49.2542	4.16483	15.6817	155.873	73.2623	95.0302	6.42866	73.7814	42.7034	80.4802	18.4975	227.187	11.4223	6.99826	7.38401	1.39514	97.5197	133.106	60.9729	18.4727	37.953	3.91039	137.886	3.88076	12.7762	0	0	0	4.28453	2.82481	0	0.676934	0	4.2925	0
RD4|1354557	9548	14	1	1	Low-quality	Genome-fragment	24.82	AAI-based (medium-confidence)	Virulent	104.836	199.287	264.705	36.3071	58.3602	211.832	355.497	94.2895	173.533	118.167	374.474	64.3992	69.5109	36.9725	20.5208	34.1444	87.7774	109.604	130.535	12.8342	21.8216	188.27	123.184	20.2137	98.1367	226.746	213.523	53.9164	85.8568	102.775	210.015	22.7346	124.621	182.334	67.3003	32.6375
RD1|326574	17165	31	7	0	Low-quality	Genome-fragment	27.46	AAI-based (medium-confidence)	Virulent	18.1204	3.26038	7.81123	184.703	154.064	1.55553	5.99225	7.53568	25.6507	0	5.86012	4.59876	0	0	0	8.30933	1.09898	3.81042	2.73999	1.38814	2.83467	0	0.628631	1.34926	0	0	0	1.0711	1.83683	0	2.38409	1.45119	0.761763	0.332535	0.301901	0.864501
RE12|2075588	37215	54	15	1	Medium-quality	Genome-fragment	62.22	HMM-based (lower-bound)	Temperate	0	0	0.720568	0	0.0827242	0	2.12605	0.13903	1.24538	0	0	0.558191	7.11409	0.592862	64.1582	0	2.60687	14.8803	5.89768	0.45733	3.52008	1.88895	0.144975	6.74191	0	0	0	0	0	0	0	0	0	0	0	0
RF5|133325	10504	10	4	0	Low-quality	Genome-fragment	20.37	AAI-based (high-confidence)	Virulent	0	0	0	0.640829	0	0	0	0	0	0	0	0	0	0	0	0	0	0	0	0	0	0	0	1.46992	0	0	0	143.527	0	0	0	132.124	8.09137	0	0	31.0797
RE6|1112059	7043	8	1	0	Low-quality	Genome-fragment	14.59	AAI-based (medium-confidence)	Virulent	0.802955	41.717	0	22.4598	76.9317	3.79109	29.2083	12.4887	8.22567	8.75017	5.1935	8.8484	32.9562	7.44008	6.68531	4.33956	3.44365	9.90577	12.2427	19.8154	54.2058	37.0729	1.53208	24.1148	4.65644	1.59271	11.3964	0	4.47668	1.67867	9.68407	1.01052	0	1.62089	0	2.63367
RF10|2077506	6061	11	3	0	Low-quality	Genome-fragment	13.48	AAI-based (medium-confidence)	Virulent	122.229	34.6257	34.2887	38.8705	16.2538	42.9519	92.684	152.804	64.0412	21.1179	122.208	36.3298	124.461	20.0212	2.00476	42.5824	24.4542	23.0214	33.6256	15.1634	4.7344	19.0544	91.6859	8.91603	199.429	63.8514	27.8099	116.028	68.369	76.0751	21.3809	68.6929	53.9336	61.2139	39.3298	67.9404
RE1|1213683	15003	23	6	0	Low-quality	Genome-fragment	28.74	AAI-based (medium-confidence)	Virulent	3.01551	0	0.893686	60.7936	2.05198	0	0	47.2464	3.86145	0	0	57.3223	5.8016	0	0.101237	176.554	6.10711	0	0	10.8903	0.166316	0	0	20.068	13.4278	1.49537	11.7698	82.1054	1.20087	0	0	67.5985	3.48614	3.04364	0	125.366
RE12|1642039	10457	20	2	2	Low-quality	Genome-fragment	12.18	HMM-based (lower-bound)	Virulent	0	1.33797	6.411	0	10.5985	0	0	0.494788	0	1.81336	0	0	0	0	187.152	0	3.60791	0	1.49922	0	45.5762	2.4009	0	0	0.44803	0	2.3027	0	0	0	23.4807	0	0	0.54585	0	0.354766
RE6|181767	5974	7	2	0	Low-quality	Genome-fragment	12.95	HMM-based (lower-bound)	Virulent	0.946638	1.171	0	0	1.03066	4.46948	2.64884	0	5.81855	10.3159	59.6976	3.47725	164.52	29.0842	2.2882	6.25299	14.4351	145.979	211.252	3.98851	57.8491	100.021	29.8029	318.544	17.2533	41.3098	0	5.38577	5.27775	28.6962	0	1.19134	16.4157	3.82187	7.80702	8.69385
RF2|1572677	5464	9	2	0	Low-quality	Genome-fragment	7.17	HMM-based (lower-bound)	Virulent	22.7699	5.12119	3.68081	127.505	1.12686	39.0932	156.388	46.3994	34.9891	8.67601	28.4509	38.7785	7.96499	0.504744	0.555951	89.4978	8.38442	14.3644	2.8692	3.11485	0	0	33.5721	0.706443	72.0249	112.914	5.87588	47.1077	164.868	62.7494	32.4548	33.8659	83.757	76.2593	56.9047	38.7002
RD2|612540	14234	13	1	0	Low-quality	Genome-fragment	11.53	HMM-based (lower-bound)	Virulent	0	0	0	0	248.294	0.937919	2.22343	0	0	0	0	0	0	0	0	0	0	0.612673	2.2028	0.478278	0	0	0	0	0	0	0	0	0	0	0	0	0	0	0	0
RF5|2418855	7808	5	0	4	Low-quality	Genome-fragment	3.34	AAI-based (high-confidence)	Virulent	68.807	53.7568	32.627	68.5368	26.4171	47.8752	62.8265	231.266	44.5185	30.9643	77.2968	77.6863	53.8806	20.8398	3.69599	110.473	21.0535	32.3902	70.2748	283.804	6.55128	42.4439	42.1502	83.5477	55.2029	54.5933	66.8186	110.082	47.88	48.4543	54.1586	232.89	57.7754	48.2486	34.5121	86.4731
RF1|1093	9449	13	4	0	Low-quality	Genome-fragment	17.4	HMM-based (lower-bound)	Virulent	1.197	0	0	11.0419	0.32581	0	0	14.2369	3.6787	0	0	12.3113	2.68675	0.583749	0	31.6269	5.13359	0.922933	0	83.9359	0	1.06281	0	43.302	45.12	5.93581	0	166.362	34.7979	3.12807	0	130.305	62.2716	1.20816	0	162.934
RE3|671964	13342	19	2	0	Low-quality	Genome-fragment	12.07	HMM-based (lower-bound)	Virulent	0	0	0	0	0	0	8.30229	1.55119	0	0	0	0	0	0	0	2.03624	0	258.186	0	0	0	0	0	0	0	0	10.8287	1.37802	0	0	0	0	0	1.28346	2.33044	0.556107
RD7|970174	8306	16	0	14	Low-quality	Genome-fragment	5.5	AAI-based (medium-confidence)	Virulent	768.689	683.047	481.854	294.989	186.435	576.221	662.992	432.932	560.083	522.798	860.939	361.141	325.296	273.601	49.4644	318.906	237.819	430.475	721.956	273.345	76.0047	412.291	636.567	339.714	491.857	507.123	470.61	328.154	357.363	579.328	488.586	231.351	523.436	478.985	431.74	332.747
RE10|858114	5861	6	1	0	Low-quality	Genome-fragment	5.24	HMM-based (lower-bound)	Virulent	37.6307	20.2908	11.4383	49.3848	65.1329	26.195	47.2484	9.71063	42.5036	21.8385	43.6861	25.5189	297.638	19.7633	4.79421	30.1295	31.266	112.339	53.497	206.174	58.1129	112.23	23.0133	570.999	76.7385	14.3544	15.0642	7.05807	10.759	65.5592	20.9467	4.85723	76.9681	3.89555	21.2201	12.0263
RE12|2008296	5025	3	0	3	Low-quality	Genome-fragment	0.73	AAI-based (medium-confidence)	Virulent	0	0	9.33888	1.33956	41.0477	0	0	0	4.61161	8.49058	0	0	3.60868	12.0745	31.7373	0	11.2621	0	0	1.35479	49.4082	2.99776	0	0	0	0	0	0	0	0	5.42925	0	0	0	0	0
RE3|542104	5168	12	2	0	Low-quality	Genome-fragment	2.56	HMM-based (lower-bound)	Virulent	0	0	0	0	0	0	0	0	0	0	0	0	0	0	0	0	0	166.215	3.03353	0	0	0	0	0	0	0	0	0	0	2.2877	0	0	0	0	0	0
RE3|676464	11937	12	5	0	Low-quality	Genome-fragment	27.51	AAI-based (high-confidence)	Virulent	0	0	0	0	0	0	0	0	0	0	0	0	0	0	0	0.568978	0.451512	258.621	0	0	0	0	0	0	0	0	0	0	0	0	0	0	0	0	0	0
RE12|1444623	11662	13	4	0	Low-quality	Genome-fragment	13.41	HMM-based (lower-bound)	Virulent	0	0	0	0	0.527968	0	0	0	0	0.812995	0	0	1.24395	0.472976	33.7973	0	0	0	0	0	0	0	0	0	0	0	0	0	0	0	0	0	0	0	0	0
RE2|1562028	6185	14	2	0	Low-quality	Genome-fragment	3.54	HMM-based (lower-bound)	Virulent	5.48606	0	2.16782	1.08832	0	5.39625	2.55847	0	0	1.53293	5.91395	0	0	4.01314	0.245571	0	142.476	4.22997	0	0	0	0	5.23385	6.24091	11.3623	12.6956	7.78638	3.71574	8.01067	5.73461	19.8494	0	4.22818	12.9202	7.54068	0
RE12|891984	6207	5	5	0	Low-quality	Genome-fragment	16.8	AAI-based (high-confidence)	Virulent	0	0	0	0	0	1.07543	2.54941	0	0	1.52749	0	2.00803	0	0	28.263	0	0	0	0	0	0	0	0	0	0	0	0	0	0	0	0	0	1.0533	0	1.66977	0
RE4|1965283	5442	2	0	2	Low-quality	Genome-fragment	2.77	AAI-based (high-confidence)	Virulent	325.263	312.37	234.061	127.402	60.5307	329.956	380.92	266.211	260.817	313.599	487.3	148.87	162.609	129.23	26.7935	131.669	85.1735	215.536	481.093	156.372	33.2423	261.119	357.897	123.418	229.862	285.487	292.032	143.584	190.364	343.258	305.807	129.472	264.3	256.973	305.671	143.838
RD5|61480	6676	8	0	4	Low-quality	Genome-fragment	1.98	AAI-based (medium-confidence)	Virulent	25.4129	29.3402	22.0922	84.1912	17.5234	19.9975	48.5913	240.255	38.1826	36.9248	32.874	140.645	21.7299	17.3506	4.55021	280.282	23.4124	24.1664	34.0505	99.935	6.16708	34.5981	30.7098	74.5867	20.3515	32.7653	61.3165	115.667	13.4936	29.2206	39.8441	224.94	42.11	26.5049	25.6157	138.923
RE12|1917693	8680	10	2	1	Low-quality	Genome-fragment	15.34	AAI-based (medium-confidence)	Virulent	0	6.44751	1.5447	0	0	0	0	0	0	0	0	0	0	0	41.2087	0	0	0	0	0	19.6917	4.62787	0	0	0	0	0	0	0	0	0	0	0	0	0	0
RF9|1163942	8723	10	4	0	Low-quality	Genome-fragment	16.55	AAI-based (medium-confidence)	Virulent	155.595	36.0885	9.99104	53.631	31.7634	44.3838	42.6307	107.359	132.165	59.7802	114.266	45.2469	90.2211	30.9843	0.522363	79.4191	51.2834	26.9932	56.613	21.072	19.7376	20.1471	56.9025	26.993	223.43	95.1616	46.0074	157.024	161.103	138.247	140.742	117.081	208.359	90.9557	96.8344	208.391
RF10|1073791	6293	12	3	0	Low-quality	Genome-fragment	7.44	HMM-based (lower-bound)	Virulent	107.838	43.354	31.9593	63.1089	24.9496	45.6113	46.5195	109.35	57.0772	38.4188	49.4059	50.8351	36.8839	35.9367	4.58578	59.3602	37.256	20.7869	13.7018	45.9768	15.6621	26.331	28.2921	26.3754	87.8493	44.5634	35.7128	70.8482	27.914	46.9682	50.9396	56.5474	66.4899	36.2813	19.7634	37.1392
RE12|361716	6990	7	2	0	Low-quality	Genome-fragment	19.9	AAI-based (high-confidence)	Virulent	0	0	0	0	0	0	0	0	0	0	0	0	0.518845	0	35.9615	0	6.554	0.623805	1.12141	0	0.178486	0	0	0.552218	0	0	0	0	0	0	0	0	0	0	0	0
RE8|583913	5213	8	2	0	Low-quality	Genome-fragment	7.52	HMM-based (lower-bound)	Virulent	0	0	0	0	0	0	0	0	0	0	0	0	12.5227	3.17428	0.58272	1.30287	0	103.719	0	1.30593	0.478657	1.92643	210.096	91.8167	0	0	0	0	6.91223	0	0	6.14363	0	0	0	0
RD2|739190	20662	21	3	0	Medium-quality	Genome-fragment	50.33	AAI-based (medium-confidence)	Virulent	0	0.677142	2.92014	1.46601	197.719	0.323065	0.382929	0	0	730.519	9.73661	4.82581	23.8716	14.0152	0.845362	0	15.1294	0	0	0	20.53	0.729054	0.522237	0	0	0	0	1.77964	0.435987	0.572202	7.26216	0.172226	0	1.10502	0.250805	0.359093
RE12|710152	8995	2	0	0	Low-quality	Genome-fragment	10.33	AAI-based (high-confidence)	Virulent	0	1.55543	7.45301	0	7.18735	0	7.03687	0	0	0	0	6.46633	7.66067	11.3444	37.7393	0	1.79757	0	0	0	3.88364	1.11645	0	1.71651	0	0	0	1.02198	0	0	5.30778	0	0	0	0	0.824856
RE1|229121	10748	26	3	0	Low-quality	Genome-fragment	9.55	HMM-based (lower-bound)	Virulent	28.4129	20.8278	13.7223	56.3653	12.603	8.69486	16.9313	134.79	15.6315	8.38025	13.6129	59.5284	36.7801	7.44136	1.55447	147.869	37.6096	7.30249	13.1276	52.2557	1.62511	14.9497	20.581	32.3223	69.308	24.0047	34.3522	175.764	38.9736	15.9501	39.3441	144.354	57.7869	26.0225	25.0717	128.745
RE12|177637	7181	4	2	0	Low-quality	Genome-fragment	9.12	HMM-based (lower-bound)	Virulent	0	18.5093	110.162	0	4.28712	1.85912	0	0	0	0	0	1.15711	15.1513	0	38.7065	0	2.25165	0	0	0	2.95356	1.39848	0	2.15012	0	0	4.47094	0	1.25447	0	1.89959	0	0	0	1.44329	0
RE6|1548949	5116	11	3	0	Low-quality	Genome-fragment	6.83	AAI-based (medium-confidence)	Virulent	0	0	0	0	4.81404	0	0	0	0	0	0	0	2.83559	1.07815	0	2.65516	1.0535	34.0922	0	5.32276	60.4788	1.96296	0	0	0	0	0	0	0	0	0	0	0	0	0	0
RE6|1381155	9684	6	0	0	Low-quality	Genome-fragment	21.39	AAI-based (medium-confidence)	Virulent	1.16795	9.39097	19.3837	0.347546	21.6175	1.3786	0	3.2057	3.58943	83.2195	1.88857	7.29332	1.12352	72.337	69.2458	0	7.79181	0.450268	0	0	95.0787	2.07404	0	0	1.93517	0	4.97302	0	1.86046	0	5.63444	0	0	0.589422	0	1.53234
RE11|870778	8199	8	0	3	Low-quality	Genome-fragment	7.71	AAI-based (medium-confidence)	Virulent	1.37949	8.5322	30.2534	0	60.4527	1.62829	0	0	1.41318	81.5247	2.23062	8.10756	7.51973	120.085	54.0002	0	44.7005	0	5.7363	0	77.1488	2.44968	2.63214	4.23711	5.71417	0	0	1.1212	1.09871	0	34.1066	0	0	6.96177	2.52817	0
RF1|7609	7859	14	1	0	Low-quality	Genome-fragment	5.01	HMM-based (lower-bound)	Virulent	13.6721	3.56053	1.70607	39.8274	24.6788	0	4.02702	107.312	6.63444	3.61922	0	75.5962	20.7663	0.350925	0	165.066	38.0619	1.66448	0.99741	16.0255	1.74625	0.638916	0	14.2436	37.5567	1.42734	0	144.459	25.7906	3.00874	0	114.558	19.1335	3.63148	3.29694	127.924
RF9|1478408	7045	18	2	0	Low-quality	Genome-fragment	9.13	HMM-based (lower-bound)	Virulent	4.01364	15.8877	2.85478	6.68827	4.36988	15.1601	12.3539	12.4852	0	12.7851	7.78803	2.3589	9.78108	4.69766	1.40136	58.3263	15.3008	2.47574	28.929	1.4495	1.23965	5.70191	35.9937	2.19163	51.8714	63.6905	68.3587	37.1885	101.016	290.327	116.176	41.4194	43.6165	25.9269	27.2163	222.745
RD2|170404	5281	6	0	0	Low-quality	Genome-fragment	12.18	AAI-based (medium-confidence)	Virulent	0	0	0	0	120.089	0	0	0	0	0	0	0	0	0	0	0	4.08233	0	0	0	2.36247	0	0	0	0	0	0	0	0	0	0	0	0	0	0	0
RD2|946757	5613	6	1	0	Low-quality	Genome-fragment	5.19	HMM-based (lower-bound)	Virulent	30.2256	7.47787	54.9409	101.934	159.057	29.7308	83.1664	45.1677	70.1848	60.809	13.0332	356.766	97.5655	8.35287	2.16477	3.02507	5.76131	10.0989	2.79303	32.7474	49.7892	305.944	7.68962	93.5259	67.6089	129.901	104.388	4.91328	48.1473	124.274	46.1747	24.0912	138.607	16.2707	32.3133	18.506
RF4|3386	6538	6	0	0	Low-quality	Genome-fragment	11.3	AAI-based (medium-confidence)	Virulent	9.51474	9.62985	7.17771	6.17736	7.534	22.4616	22.9932	11.0792	7.08882	1.45016	11.1893	12.0737	2.21886	5.06195	0.464625	7.27183	21.8457	8.6701	14.3872	3.12381	1.14495	12.2881	16.5042	0.590395	22.9308	17.1574	19.6426	68.8963	126.073	21.6999	324.438	31.0242	14.9996	28.8104	31.7047	120.86
RE12|1002424	6039	6	2	0	Low-quality	Genome-fragment	16.11	AAI-based (high-confidence)	Virulent	5.61869	22.0095	62.1664	0	7.13696	1.10534	0	0	0	0	0	8.25558	39.6363	0.91337	34.5824	0	12.0485	4.33224	0	2.25462	6.61099	22.4497	0.893397	9.58769	21.7224	1.85751	13.291	3.04446	17.1545	40.1339	42.9175	1.76777	28.1476	22.6844	12.8716	7.37167
RE5|466085	5424	9	6	1	Low-quality	Genome-fragment	13.54	AAI-based (medium-confidence)	Virulent	36.492	30.9538	8.6519	35.9894	107.841	22.1521	37.9266	13.3547	71.5623	19.228	6.74369	125.619	197.919	8.13546	5.18047	18.7829	5.46522	53.0579	59.2523	160.029	49.4539	97.2032	1.98939	234.134	19.8665	1.03406	0	12.7112	3.32167	3.26959	2.51493	6.56071	28.9284	2.1047	16.2419	17.099
RE1|189850	19364	11	4	0	Low-quality	Genome-fragment	11.62	HMM-based (lower-bound)	Virulent	14.8944	2.52886	11.0787	118.364	6.67736	4.82609	11.8493	160.051	8.67625	1.46888	3.77792	113.928	18.9165	1.1394	0.392186	169.762	7.93258	1.35108	2.02403	145.023	0.515438	2.59308	0	67.1773	30.9691	2.89648	14.5076	143.132	11.3977	3.66335	8.80563	134.887	13.8427	6.77975	2.67616	144.453
RE12|1713763	6847	15	3	0	Low-quality	Genome-fragment	7.52	HMM-based (lower-bound)	Virulent	0	0	0	1.96619	2.24812	0	0	1.51132	0.846114	0	0	0.606779	0	2.41676	42.9238	0	0.787163	0	2.28966	0	1.45771	0	0	1.1275	1.3685	0	0	0	1.9735	1.72672	0.996128	0	0	0	0	2.16725
RD7|2118886	14939	24	6	2	Low-quality	Genome-fragment	19.5	AAI-based (medium-confidence)	Virulent	0	0.936549	1.34627	0	1.44254	0	0	0	0	272.903	4.89695	0	1.21384	7.38449	12.7597	0	0	0	0	0	0.918656	0	0	0	0	0	0	0	0	0.791408	11.8705	0	0	1.52834	0.693771	0
RF6|1448331	8650	7	1	0	Low-quality	Genome-fragment	4.82	HMM-based (lower-bound)	Virulent	155.6	128.589	70.5275	112.836	29.5401	86.4299	92.3838	168.678	70.3238	144.683	181.832	125.359	108.592	78.4334	7.19922	138.586	53.2739	66.0361	234.706	140.091	17.0195	53.9856	205.206	88.3562	252.397	197.765	153.106	237.523	130.179	275.411	149.026	220.505	264.536	171.569	225.857	191.279
RF8|1895042	58214	102	28	0	High-quality	High-quality	100	AAI-based (medium-confidence)	Virulent	0	0.480678	0.921288	0.231259	0.105768	0	0	0	0.398072	1.14007	4.08416	0	0	10.9911	0.0782729	0	0	0.749029	41.069	0	0	1.20757	51.715	0.397843	0.160959	32.1799	34.8832	0.157913	0.464237	15.9428	36.3203	0	0	47.5549	813.986	2.03926
RE10|1160508	17990	14	1	2	Low-quality	Genome-fragment	9.36	HMM-based (lower-bound)	Virulent	21.0617	20.2206	4.47181	19.8309	32.0008	5.56573	22.8698	6.6149	42.8301	3.68916	8.64122	13.8564	219.337	2.14624	3.3349	10.0047	2.69635	43.6282	45.3151	113.905	30.653	32.3771	1.79941	248.25	14.8442	0.62354	0	0	1.50223	5.91471	0.758254	0.791224	5.0878	0	4.6089	1.64971
RF5|2403507	12651	11	0	8	Low-quality	Genome-fragment	17.17	AAI-based (medium-confidence)	Virulent	176.572	264.87	293.574	155.898	88.3349	322.388	406.517	271.562	190.959	164.127	703.308	180.293	147.351	114.45	7.44362	277.291	108.212	150.965	472.141	54.6197	18.9347	199.246	442.672	89.0935	284.043	343.148	368.617	307.369	205.787	328.023	413.51	232.622	209.814	300.039	410.031	263.917
RF9|859846	5547	12	1	0	Low-quality	Genome-fragment	9.29	AAI-based (medium-confidence)	Virulent	0	2.52228	0	18.2024	1.665	0	0	0	0	0	1.64854	2.24695	5.23054	0	0	42.8549	0.971643	0	0	6.13648	0	0	0	5.56698	6.75687	2.02226	0	55.5177	6.49602	0	0	80.8319	14.1435	0	0	176.561
RE12|1709343	13378	19	2	0	Low-quality	Genome-fragment	20.56	HMM-based (lower-bound)	Virulent	0	0	0	0	0	0	0	0	0	0	0	0	4.06644	0.412307	41.9508	0	9.46763	0	1.17187	0	7.08768	0.750671	0	2.01974	0.700411	0	0	0	0.673371	0	2.54914	0	0	0	0	0
RE3|1639655	5752	7	0	4	Low-quality	Genome-fragment	13.69	AAI-based (high-confidence)	Virulent	341.161	400.128	293.707	143.94	85.6351	306.371	367.268	299.538	249.782	338.73	556.425	160.349	139.974	134.252	25.3495	151.141	131.182	270.63	542.382	135.517	44.031	282.838	386.445	117.438	255.755	293.504	266.525	137.444	198.115	341.202	252.567	154.046	269.378	311.596	301.81	147.05
RE6|2084455	5836	5	4	0	Low-quality	Genome-fragment	11.21	HMM-based (lower-bound)	Virulent	0	0	0	0	0	0	0	0	0	0	0	0	1.24288	0	0	0	0	0	0	0	65.2028	0	0	0	0	0	0	0	0	0	0	0	0	0	0	0
RF5|1340151	8046	11	4	0	Low-quality	Genome-fragment	8.18	HMM-based (lower-bound)	Virulent	30.9258	25.2139	9.16528	29.2809	11.0961	28.2073	54.0846	18.0055	3.60014	23.5673	11.3652	16.5235	5.85973	15.7674	4.53053	16.8826	13.7322	8.129	38.9692	1.69222	3.41134	7.4888	53.6438	0	60.5574	40.4309	117.713	38.2745	108.602	72.0009	83.0734	191.504	56.8789	75.9075	87.5925	58.5562
RD2|1011855	5151	11	6	0	Low-quality	Genome-fragment	8.17	HMM-based (lower-bound)	Virulent	0	0	9.11044	0	132.084	0	0	0	0	3.68128	0	2.4197	0	0	31.8456	0	13.0793	0	0	0	3.87534	0	0	0	0	0	0	0	1.74886	0	5.29644	0	0	0	0	0
RE1|1159705	46488	69	4	1	High-quality	High-quality	92.49	AAI-based (medium-confidence)	Virulent	16.5442	3.61154	0.865254	57.4115	3.90716	3.8769	1.53177	187.314	29.1611	3.05922	0	54.6049	33.234	0.949207	0.016336	78.9669	21.6223	2.25111	0.843083	71.83	1.85178	0.972104	0.348169	22.0036	38.0947	2.77493	5.52501	81.4707	4.55379	2.03456	1.46715	117.117	26.8612	2.2101	0.780306	66.3147
RF7|968779	6935	5	0	4	Low-quality	Genome-fragment	2.5	AAI-based (medium-confidence)	Virulent	123.134	344.986	308.374	14.074	79.0177	256.034	395.889	15.6675	134.496	108.688	373.162	8.38712	35.5612	63.629	4.8183	15.6698	80.0489	149.014	236.233	4.9083	17.0907	191.147	217.832	17.8111	68.9077	289.536	317.123	19.2206	136.392	170.481	308.815	10.2625	127.268	314.411	175.602	30.4914
RE2|1116203	48008	47	6	3	Medium-quality	Genome-fragment	60.62	AAI-based (medium-confidence)	Virulent	10.3662	70.9639	194.244	43.6758	41.105	19.3269	94.1051	47.0971	30.8927	2.46864	1.33334	73.0399	8.3854	0.631918	22.2887	68.1905	68.2582	15.713	17.4707	29.0702	4.15804	58.8851	1.91049	33.3674	16.4925	13.9027	238.246	52.275	53.7597	1.84701	85.384	46.8462	46.7104	69.3163	1.83503	78.3563
RE12|1939994	5287	5	1	0	Low-quality	Genome-fragment	12.9	AAI-based (medium-confidence)	Virulent	2.13929	1.32316	2.53603	0	2.91146	0	0	0	0	3.58659	3.45922	0	8.91761	2.08657	31.1701	0	0	0.824739	4.44788	0	0.707936	0	0	2.92037	5.31687	2.12171	0	0	0	0	0	0	0	0	0	1.40336
RE12|1822655	20060	13	5	0	Low-quality	Genome-fragment	21.14	HMM-based (lower-bound)	Virulent	0.845745	0	0	0	6.59915	0	0.788842	0	0	0.945279	0	0	2.71191	3.02464	72.0057	0	20.1509	0.217368	0.78152	0	26.4948	0	0	0.577269	1.16776	0	0.800245	0	0.449071	0	9.18012	0	0	2.84544	0.516663	0.369869
RE11|1435011	6174	4	0	0	Low-quality	Genome-fragment	7.85	AAI-based (medium-confidence)	Virulent	6.41181	50.988	51.0346	0	212.918	3.24352	6.40758	0	18.7669	33.0166	10.3679	95.5549	11.161	237.644	48.9558	0	94.717	4.23751	6.34811	0	111.344	23.5854	1.74772	33.1358	2.27651	0.908446	7.80025	0	4.37724	1.91494	27.6178	0	3.17679	12.0187	0	3.60524
RF5|1671332	11606	15	1	7	Low-quality	Genome-fragment	3.33	HMM-based (lower-bound)	Virulent	131.075	211.566	156.538	138.616	120.162	254.215	233.149	245.192	198.669	161.75	200.916	165.383	184.367	55.8428	7.32863	198.677	221.514	167.187	186.409	65.9899	25.907	156.184	224.995	138.024	328.995	385.644	323.659	308.114	308.532	319.867	348.488	247.742	354.888	322.628	211.196	372.385
RE12|944994	53731	96	27	1	Medium-quality	Genome-fragment	58.15	AAI-based (high-confidence)	Virulent	0	0	0	0	0	0	0	0	0	0	0	0	1.14746	0	53.935	0	9.83028	0	1.31298	0	0	0	0	0	0	0	0	0	0	0	10.155	0	0	0	0	0.207131
RE11|286565	17759	21	15	0	Low-quality	Genome-fragment	39.19	AAI-based (medium-confidence)	Virulent	57.9565	5.90874	155.529	8.52826	104.705	34.2046	25.8405	7.86632	201.604	44.3119	4.11935	14.5046	11.0278	332.18	74.6216	1.14734	2425.05	462.582	23.3937	18.9756	79.8071	35.0602	61.9757	44.7751	37.4614	0.947477	21.6943	0.776458	133.662	18.9735	306.479	4.20796	18.4071	3.85695	41.7278	1.88007
RE8|306369	5389	7	6	0	Low-quality	Genome-fragment	14.14	AAI-based (high-confidence)	Virulent	0	1.29812	4.97605	0	4.57017	11.148	1.46819	0	0	0	0	3.85472	0	66.5299	2.39568	2.52065	3.50046	8.09129	46.5461	5.05312	15.7428	41.9291	181.209	7.16275	0	0	0	0	0	0	0	0	0	0	0	0
RE9|1041080	5438	7	3	0	Low-quality	Genome-fragment	8.53	AAI-based (medium-confidence)	Virulent	54.0771	64.321	4.93121	96.5499	234.375	51.5552	80.0229	21.8834	127.841	42.7157	13.4527	274.275	314.12	9.12883	0.837914	36.2201	10.4067	72.9673	53.334	329.875	77.7754	88.6427	5.95281	246.308	97.3539	26.8164	5.90398	0	14.909	71.7459	7.52537	7.85258	108.202	12.5957	28.5884	60.0334
RE5|583297	6903	8	2	0	Low-quality	Genome-fragment	7.07	HMM-based (lower-bound)	Virulent	4.91544	10.1341	0	2.92536	21.8529	7.73596	4.58472	0	1.6785	4.12045	5.29882	1.20371	69.3506	3.1962	0	5.90342	4.68466	17.055	10.2199	182.942	2.16883	31.2782	3.12631	132.525	9.50176	8.12508	0	6.65851	15.6599	3.42542	3.95219	1.03101	13.2594	0	5.25494	3.76192
RE12|1612562	36197	54	7	3	Medium-quality	Genome-fragment	77.4	HMM-based (lower-bound)	Virulent	0	0	24.6327	0.185962	0	0	0	0	0	0	0	0	0.901746	2.74291	45.3388	0	0	0	2.16555	0	0.13787	2.49696	0.298104	0	0	0	0.443487	0	0	0	15.6394	0	0	0	0	0
RF5|228294	5444	8	2	0	Low-quality	Genome-fragment	8.58	HMM-based (lower-bound)	Virulent	42.5907	2.57	13.5459	37.7119	0	8.58306	97.375	101.693	6.38502	52.2473	10.0784	32.0525	19.9856	6.58578	0	82.9648	0	0	20.1582	6.25259	0	9.22344	47.57	0	43.8901	57.6947	33.9104	48.9694	8.27366	109.672	16.287	246.43	28.8222	28.3091	84.7188	96.7653
RE11|1005553	67319	97	5	4	Low-quality	Genome-fragment	33.15	HMM-based (lower-bound)	Virulent	51.8318	55.4914	56.9628	13.8487	25.3351	59.5935	85.2101	10.2221	21.9448	75.701	9.37279	3.57949	23.5428	201.726	1.9065	0.807129	130.661	15.7396	11.0618	1.2641	9.37767	239.952	2.16389	3.6697	27.7683	37.4089	36.9614	43.0831	221.867	50.492	44.9843	0.581468	55.4539	37.1379	131.557	12.6196
RE10|2049257	7461	13	4	0	Low-quality	Genome-fragment	7.45	HMM-based (lower-bound)	Virulent	35.6246	38.4422	5.39122	52.3272	90.7771	39.3657	38.1765	13.176	52.0244	30.4983	24.5127	47.3318	402.483	22.918	5.90362	41.4195	22.0327	131.496	100.859	288.335	67.5563	120.467	13.7394	754.825	104.866	30.0697	10.7579	4.31237	4.82957	48.3309	10.0557	3.33865	52.576	10.7105	23.6151	18.3973
RE6|1872605	5806	8	4	0	Low-quality	Genome-fragment	15.92	AAI-based (high-confidence)	Virulent	0	12.0488	0	0	16.9677	0	2.72548	0	0	0	0	1.43115	0	0	0	0	1.39245	0	0	0	48.1341	0.864836	0	0.66483	0	0	0	0	0	0	4.69893	4.90324	0	0	0	2.55583
RE12|1285846	17149	19	1	2	Low-quality	Genome-fragment	9.05	HMM-based (lower-bound)	Virulent	0	0.815855	0	0	11.1302	0	0	0	0	1.10574	0	0	2.32631	4.02053	66.1606	0	13.9858	0	0	0	24.5173	0	0	0	0	0	0	0.536051	0.525299	0	4.37491	0	1.14371	0.332845	0	0.865308
RE9|1434310	7428	11	6	0	Low-quality	Genome-fragment	7.66	HMM-based (lower-bound)	Virulent	4.56802	7.53425	0	0.906201	10.3614	3.5946	4.26068	0	0.779933	1.27641	4.92431	1.11864	101.068	1.48515	2.04478	4.57181	0.725593	14.0885	16.8845	17.8719	9.23789	8.78785	13.0741	128.875	6.93801	0	0	0	0	4.77498	0	0	11.4421	0	0	0
RE10|134362	6703	11	5	0	Low-quality	Genome-fragment	12.02	AAI-based (medium-confidence)	Virulent	23.6231	8.34916	0	0	1.83714	0	0	0	12.1001	1.41446	2.72846	2.47926	151.497	0.822891	1.24627	0	1.60815	10.4082	11.6942	0	8.37578	4.49462	0	80.0449	1.3979	0	0	0	0	0	0	0	0	0	0	0
RE12|2017239	6083	16	2	0	Low-quality	Genome-fragment	2.99	HMM-based (lower-bound)	Virulent	0	0	0	0	0	0	0	0	0	0	0	0	1.19241	0	28.9639	0	18.1636	0	0	0	1.2306	0	0	0	0	0	0	0	0	0	10.0911	0	0	0	0	0
RE1|745640	5192	14	0	0	Low-quality	Genome-fragment	5.07	AAI-based (medium-confidence)	Virulent	0	0	0	11.6682	0	0	0	7.97227	0	0	0	24.8061	0	15.9356	0	155.015	0	0	0	10.4897	0.480593	0	0	0	3.60944	0	3.09185	159.35	0	0	0	106.235	2.51842	0	0	122.183
RF9|2188412	17641	35	4	0	Low-quality	Genome-fragment	9.32	HMM-based (lower-bound)	Virulent	49.6887	179.241	184.311	102.261	43.8027	206.601	128.272	100.893	125.45	33.8593	73.0892	89.258	61.2643	15.4772	2.58295	110.882	94.8644	99.1167	27.9936	54.0272	9.83045	146.587	32.4185	73.7386	110.48	143.072	277.998	144.866	128.939	52.2749	72.6859	62.7347	134.159	207.403	29.0817	197.045
RE12|29595	34603	36	2	0	Low-quality	Genome-fragment	19.98	HMM-based (lower-bound)	Virulent	0	2.02166	1.16244	0	0	0	0.457306	0	0.334846	1.09599	0	0	0	1.11582	52.4312	0	0	0	0	0	0.612939	2.46687	0	0.892409	0	0	0	0	0.260335	0	1.18264	0	1.13363	0	0	0
RE2|1959989	7484	16	2	0	Low-quality	Genome-fragment	5.67	HMM-based (lower-bound)	Temperate	39.2933	143.949	59.1212	28.7815	56.767	140.924	79.29	36.6411	111.47	53.2079	20.7717	41.0799	20.3531	23.2161	6.69727	53.09	134.671	62.9239	16.7582	15.0092	13.003	119.426	6.48811	50.0295	56.3408	110.916	90.0885	95.8089	105.322	52.1317	74.7301	20.4459	107.45	170.842	4.84699	103.601
RE6|614017	83963	122	15	2	Medium-quality	Genome-fragment	83.97	HMM-based (lower-bound)	Virulent	0.808244	0.166634	0	0	1.5033	0	3.20392	0.431357	0.758986	0.225841	0	0	28.897	6.7993	3.96163	0.0808914	5.64884	59.2548	83.0889	2.47297	110.626	13.3361	0	0.551672	3.12474	0.1336	0.19119	0	0.10729	0.14081	0.812321	1.01717	0.311462	0	0	0.0883673
RE5|100138	24116	34	9	0	Low-quality	Genome-fragment	37.04	AAI-based (medium-confidence)	Virulent	17.353	2.90079	9.45163	138.723	10.8509	6.08947	9.84253	213.903	12.9723	3.7349	4.17104	139.716	24.0619	1.02925	0.598323	209.395	7.59868	1.80809	0.650079	181.515	1.29335	11.8681	2.46092	79.0696	34.9688	6.04691	36.2781	173.25	12.1401	3.18662	5.6564	189.318	11.9284	9.4675	6.01673	181.367
RD7|458423	6072	12	3	0	Low-quality	Genome-fragment	8.15	HMM-based (lower-bound)	Virulent	1163.27	717.758	309.143	490.544	277.336	521.085	479.52	789.904	677.416	830.693	1162.63	452.957	532.182	502.803	52.9049	462.524	392.777	466.057	934.648	572.924	188.622	383.705	772.143	534.629	936.701	755.592	454.727	551.08	565.248	1011.52	356.076	494.045	879.678	586.589	827.843	564.533
RD1|762253	5280	8	1	1	Low-quality	Genome-fragment	2.24	HMM-based (lower-bound)	Virulent	237.776	370.976	462.169	175.931	65.8863	460.182	485.514	218.523	286.375	184.954	663.319	201.436	171.72	106.034	11.3627	106.766	148.013	178.38	350.364	174.708	14.8864	306.22	308.591	171.799	249.337	351.609	658.23	210.667	274.687	246.309	430.156	136.815	303.365	380.531	286.587	195.326
RE9|1315557	5779	7	2	0	Low-quality	Genome-fragment	7.57	HMM-based (lower-bound)	Virulent	5.87148	10.8946	0	1.16478	14.3834	2.31015	24.644	0	10.0248	9.84372	4.74707	0.718916	134.927	19.0893	6.04495	7.05162	14.9222	48.2895	112.581	17.6704	54.188	71.2479	30.8085	189.026	24.3211	15.5286	11.1112	1.59071	3.11762	33.7562	33.0462	1.23154	14.707	4.93853	38.5588	6.41943
RE12|767014	60199	70	9	3	Medium-quality	Genome-fragment	63.53	AAI-based (medium-confidence)	Virulent	1.31519	0	0.334091	3.35451	0.409121	1.10885	2.36578	0.257845	4.90806	0.157497	1.21523	9.86911	3.07252	0.549761	73.7365	0.394884	0.179063	0.941629	0	0.113089	0.352323	0.667285	1.61322	0.192362	2.87956	0.55902	2.26664	0.229059	1.12232	2.35675	1.81279	1.00492	3.58392	0.189636	1.72167	0.986007
RE12|170607	5299	7	6	0	Low-quality	Genome-fragment	5.95	HMM-based (lower-bound)	Virulent	0	0	2.53028	0	8.13363	0	0	0	0	0	0	0	4.1065	0	33.6792	0	2.54279	0.822871	0	0	1.64811	0	0	0	0	0	0	0	0	0	5.14851	0	0	0	0	0
RD10|180484	6412	6	2	0	Low-quality	Genome-fragment	11.56	AAI-based (medium-confidence)	Virulent	243.425	16.3651	8.3643	4.19917	3.3609	8.32834	1.23395	0	224.072	6.65395	0	0.647944	7.91861	3.87107	20.8452	2.64812	11.7679	103.366	0	5.83952	191.073	377.454	21.8771	15.0499	2.19201	0	50.0715	0.716839	34.4206	12.907	42.5483	0	11.2159	9.79219	4.04096	4.62856
RE7|30902	7795	10	1	1	Low-quality	Genome-fragment	11.79	HMM-based (lower-bound)	Virulent	50.7845	125.642	83.4236	23.3155	40.6791	122.457	90.3368	20.5765	78.0373	37.7056	140.774	30.3801	27.4505	39.6263	3.89701	11.3271	66.0316	88.942	94.5264	12.6637	8.32279	92.1151	105.205	34.1681	58.9012	93.5391	143.127	22.9966	112.677	60.6689	79.6234	6.3912	62.0653	103.981	80.441	39.9772
RF2|2287475	46957	57	14	2	Medium-quality	Genome-fragment	72.39	HMM-based (lower-bound)	Virulent	18.7877	263.095	58.2496	103.785	91.7208	6.96559	25.9484	29.7502	70.2006	7.16785	12.0739	171.026	8.57308	22.3772	97.4901	2.82049	98.5382	6.03586	4.84104	1.23233	123.707	30.262	61.0104	7.39827	50.6848	33.9222	124.951	42.0904	296.397	66.8477	123.462	5.45636	105.954	110.739	212.993	48.4294
RE10|1014705	9091	16	2	1	Low-quality	Genome-fragment	21.63	HMM-based (lower-bound)	Virulent	164.226	56.1737	72.2682	147.346	38.605	143.181	50.4786	176.432	129.364	140.272	52.3057	109.681	205.053	31.5503	2.58963	230.48	112.051	51.801	31.903	66.6478	15.096	87.2683	47.4775	39.0629	322.609	162.876	190.707	337.232	109.991	117.045	46.5153	230.555	254.58	135.62	27.9314	248.924
RD4|523243	30829	44	5	2	Medium-quality	Genome-fragment	78.5	AAI-based (medium-confidence)	Virulent	11.0063	9.98424	2.39203	1.96508	0.898739	5.41306	440.145	0.671316	1.12751	5.22818	7.11884	8.35533	2.82336	5.90427	0.61584	0.440617	2.53497	1.55582	1.52557	0.993713	1.74017	1.79161	2.27506	0.876449	4.71103	1.45545	6.76921	1.78911	4.67527	6.32771	5.97338	2.0777	3.60515	3.33268	4.03422	3.8507
RD2|1908571	6055	6	1	0	Low-quality	Genome-fragment	11.6	HMM-based (lower-bound)	Virulent	5.60384	12.7087	4.42873	10.561	224.729	19.8436	1.3067	5.127	1.91357	0	0	10.2922	2.39585	0.455478	1.63048	1.68255	1.78025	0.720131	1.29457	0.562165	2.26652	35.6587	0.891037	1.27498	3.09499	8.3367	1.32559	2.27731	3.71939	0.976288	1.12642	4.70161	7.55818	6.5988	0.855842	6.12682
RD3|174457	5732	7	2	3	Low-quality	Genome-fragment	5.13	HMM-based (lower-bound)	Virulent	489.356	349.045	232.745	173.801	145.013	377.312	317.477	332.176	308.264	296.906	633.347	192.8	244.861	247.308	31.0025	177.736	161.729	298.959	548.377	244.663	106.653	201.48	365.204	247.816	390.693	347.366	228.247	194.857	315.89	524.933	285.575	205.491	357.003	373.427	464.692	221.345
RE10|1876803	11568	19	2	0	Low-quality	Genome-fragment	25.08	AAI-based (high-confidence)	Virulent	31.2875	21.1657	5.79528	14.5472	48.4355	19.0422	21.2028	4.47269	17.5283	1.2294	5.53346	11.4927	186.227	3.81455	3.80765	9.98116	13.5115	70.487	11.5195	25.0114	37.1007	85.0763	6.0631	129.801	1.62	6.7879	0	0.397335	0.778731	2.04406	1.1792	1.84571	6.21681	1.48028	9.85536	0
RF9|2325519	5266	7	2	0	Low-quality	Genome-fragment	5.42	HMM-based (lower-bound)	Virulent	63.3607	6.64219	2.54614	170.007	17.5384	31.6899	3.00497	274.126	27.5035	27.9069	26.0476	102.564	53.0303	27.7573	0	265.046	4.60571	17.3886	17.8625	526.811	15.8736	4.7676	28.6871	96.7567	134.341	15.9763	10.6694	274.071	17.962	35.9221	15.5423	323.687	75.7325	4.33571	41.331	227.547
RE11|1977329	15623	21	9	0	Low-quality	Genome-fragment	42.91	AAI-based (medium-confidence)	Virulent	0	0	1.28733	0	9.85272	0	0	0	0	1.82061	0	0	0	128.337	0	0	0.344985	0	0	0	0	0	0	0	0	0	0	0	0	0	0	0	0	0	0	0
RF10|2053073	7105	5	1	0	Low-quality	Genome-fragment	3.96	HMM-based (lower-bound)	Virulent	221.274	105.352	53.7829	128.846	26.4312	108.982	65.702	171.132	87.2466	193.493	162.168	114.025	120.976	62.8829	8.0165	160.596	61.8242	79.1683	313.325	129.832	25.1104	91.8735	233.122	108.113	296.071	256.558	160.416	214.131	148.343	288.707	147.833	248.421	254.888	216.91	266.947	199.457
RE12|710293	5830	12	3	0	Low-quality	Genome-fragment	8.06	HMM-based (lower-bound)	Virulent	91.1818	3.59977	9.19929	4.61836	1.58418	32.0591	0	0.887479	46.7045	24.394	0	0.712628	1.24416	11.3534	93.1376	5.24245	11.0937	441.275	1.34454	5.83861	365.298	80.0987	10.1797	5.29675	3.21444	0	79.8515	0	10.8162	3.0419	56.155	0	6.72847	13.7069	1.77774	1.27266
RE11|1551620	13465	21	2	1	Low-quality	Genome-fragment	8.49	HMM-based (lower-bound)	Virulent	0	3.11722	0	0	0	0.991484	0	0.768511	0	0	0	0	0.538689	196.219	0	0	0	0	0	0	0	0	0	0	0	0	0	0	0	1.75609	1.01307	0	0.971085	2.54346	0	0
RD5|1625093	77262	160	4	1	High-quality	High-quality	98.97	AAI-based (medium-confidence)	Temperate	41.4285	41.1066	24.3822	44.2583	12.5913	42.2479	33.3843	80.8291	37.5665	21.7818	10.6521	45.976	46.8936	15.956	4.57061	121.488	24.5202	18.6805	14.1023	77.4076	12.0302	35.0295	9.98573	42.0663	65.1257	43.4111	40.6195	109.403	41.3329	28.7683	39.1952	87.464	48.5713	41.741	9.59131	80.7144
RF11|1800554	5810	7	0	5	Low-quality	Genome-fragment	2.46	AAI-based (medium-confidence)	Virulent	993.799	1029.47	591.935	440.834	311.037	639.943	836.148	713.318	858.531	855.914	1380.32	540.601	505.619	455.698	66.9239	488.057	408.17	592.894	1260.12	513.808	172.433	665.466	1017.76	488.978	612.846	737.535	657.589	371.823	584.536	864.838	547.048	423.226	778.688	654.303	676.085	480.804
RE5|473134	5805	4	1	0	Low-quality	Genome-fragment	9.04	AAI-based (medium-confidence)	Virulent	31.1743	3.61527	0	48.1219	11.6673	4.5996	1.36298	5.34781	11.9759	0	4.72581	14.3139	60.6016	1.42528	0	9.36005	0	13.5206	2.70065	207.577	45.5633	1.72997	0	196.159	4.84243	1.93238	0	0.791795	1.55183	1.01833	2.34987	2.45204	0	0	0	1.27814
RE11|437002	7224	8	1	4	Low-quality	Genome-fragment	6.51	AAI-based (medium-confidence)	Virulent	1.56567	0	3.71206	0	8.5232	1.84805	0	0	0	11.1558	0	1.15023	1.00408	116.822	7.88444	0	8.57995	0	4.34034	0	18.8248	0	0	1.06866	0	0	0	0	0	0	0	0	0	0	0	0
RE6|828366	5372	5	3	0	Low-quality	Genome-fragment	9.15	AAI-based (high-confidence)	Virulent	2.10544	0	0	0	0	0	0	0	1.07843	0	0	0.773384	0	0	0	0	0	1.62338	2.91834	0	55.042	36.4535	0	2.87417	0	0	0	0	0	0	0	0	0	0	0	0
RE11|886778	10664	14	3	0	Low-quality	Genome-fragment	33.38	AAI-based (medium-confidence)	Virulent	0	0	0	0	0	0	0	0	0	0	0	0	0	145.603	0	0	0	0	1.47011	0	0	2.82515	0	0	0	0	0	0	0	0	0	0	0	1.07051	9.23297	0
RE12|70833	7389	10	6	0	Low-quality	Genome-fragment	19.19	AAI-based (medium-confidence)	Virulent	0	0	0	0	4.16644	0	0	0	0	0	0	0	0	1.86623	25.489	0	0	0	0	0	0.337696	0	0	0	0	0	0	0	0	0	0	0	0	0	0	0
RE12|1567856	84449	128	20	6	High-quality	High-quality	95.27	AAI-based (medium-confidence)	Temperate	0.33483	3.39634	18.2586	0	3.68195	0	0.374763	0	0.548813	22.3419	0.324851	0.196787	1.11659	73.7414	56.4835	0	2.80817	0.103267	0.556927	0	2.49674	1.18918	0	0.594206	0.110956	0	0.38018	0.217711	0	0.14	12.1147	0.0842764	0	0.608315	0	0.175717
RE9|1785682	5983	4	2	0	Low-quality	Genome-fragment	18.71	AAI-based (medium-confidence)	Virulent	108.7	10.5231	10.0846	15.7509	12.3493	21.1981	27.771	19.89	45.5101	1.58468	4.58521	8.33285	69.1035	4.60959	11.1699	8.51398	11.7109	34.9823	17.032	74.5298	13.5543	32.7308	15.3299	74.8388	21.9257	1.87489	49.6371	8.45062	6.02264	6.91626	9.11983	25.5753	15.2983	1.90806	18.189	24.1822
RE6|243097	5863	13	2	0	Low-quality	Genome-fragment	8.97	HMM-based (lower-bound)	Virulent	0	2.38634	0	0	16.2777	2.27705	0	0	0	3.23423	1.55969	0	0	7.9967	43.5218	0	3.6771	0	1.33697	0.580574	68.9457	5.995	0	1.9751	0.799087	0	0	0.783962	0	0	5.81655	0	0	0	0	0
RF9|993695	7944	10	3	0	Low-quality	Genome-fragment	4.13	AAI-based (medium-confidence)	Virulent	0	0	0	0	0	0	0	0	0	0	0	0	0	0	0	0	0	0	0	0	0	0	0	2.91541	0	2.82414	8.08304	1.15719	81.6468	0	3.43429	0	6.58392	0	7.82798	115.347
RE12|1710482	5792	8	4	0	Low-quality	Genome-fragment	12.18	AAI-based (high-confidence)	Virulent	0	0	0	2.32433	2.12609	6.91488	0	1.7866	0	0	0	0	7.51393	1.42848	36.0572	24.6253	0	2.25849	0	3.52615	4.09267	0	0	2.66575	0	0	0	1.58714	0	0	0	0	4.51507	0	0	0
RF5|1179661	15304	20	8	2	Low-quality	Genome-fragment	26.97	AAI-based (medium-confidence)	Virulent	25.4972	7.3137	14.8939	43.104	1.40813	32.2767	48.0805	68.6306	6.05681	49.2519	29.2785	18.4601	25.8307	3.24376	0.496229	115.166	0.704352	3.13411	48.1464	12.4555	0.570657	3.281	44.4197	2.01778	66.4307	52.4079	47.7266	43.549	11.4782	141.76	14.2614	231.36	21.3599	45.5025	115.128	91.3873
RE5|1138068	5651	7	1	0	Low-quality	Genome-fragment	2.77	HMM-based (lower-bound)	Temperate	180.134	157.217	47.4534	92.3152	35.9558	94.4989	95.2082	162.975	123.023	107.378	210.366	83.0777	96.9094	74.1823	7.66015	83.5314	50.5493	81.0196	134.551	137.337	31.3505	66.6418	120.297	75.1372	148.403	104.215	106.527	82.1507	93.2559	128.668	82.0728	93.8278	111.066	71.7156	104.541	102.411
RE6|2172474	11425	24	8	0	Low-quality	Genome-fragment	25.13	AAI-based (medium-confidence)	Virulent	0	0	0	0	0	0	0	0	0	0	0	0	0.634875	1.20697	0	0.594476	0.70762	0.763308	2.74438	3.87316	69.8885	1.31849	0	1.35142	0.82014	1.47276	0	0	0.394239	0.517411	0.59698	0	0	0.499602	0	0
RF10|297096	9956	18	2	2	Low-quality	Genome-fragment	13.85	HMM-based (lower-bound)	Virulent	59.0741	14.7556	39.055	89.5834	27.2112	27.4891	19.8676	79.5121	63.4265	60.4713	8.26637	61.7601	81.9619	11.6345	23.8752	97.2121	93.3833	84.9655	22.8325	86.8414	29.5739	89.7731	15.7153	44.1985	143.055	65.349	61.2707	66.9419	114.007	34.4378	36.3084	32.1683	118.201	33.8258	11.4511	67.0713
RE6|1703221	16443	19	5	0	Low-quality	Genome-fragment	27.14	AAI-based (high-confidence)	Virulent	45.3985	9.78518	2.44626	2.86559	0	23.9515	0	0	41.2225	36.6145	3.33678	0	12.131	6.03814	0.0461856	0	0	35.7996	0.953433	0	75.1925	0	0	1.87801	0.569853	0	0	0	0	0.35951	0	0	0	0	0	0
RF5|1186548	18938	47	3	1	Low-quality	Genome-fragment	17.27	HMM-based (lower-bound)	Virulent	35.2368	33.9841	16.2838	108.941	40.6403	38.4197	25.4851	195.343	27.2261	20.7766	56.9778	130.531	27.1937	14.126	2.08524	277.765	22.9101	14.7357	28.9738	222.518	8.16901	21.2113	55.8382	95.1855	57.3942	40.5744	36.4492	177.418	47.3298	43.3883	24.8502	243.336	50.4025	29.8388	37.7618	142.413
RE12|973109	9120	13	0	0	Low-quality	Genome-fragment	18.87	AAI-based (medium-confidence)	Virulent	1.24018	0	0	0	3.37564	0	0	0	0	97.7223	0	0	0.397667	1.20961	46.0487	0	13.5925	0	0	0	5.88241	0	0	0	0	0	0	0	0	0	0.747861	0	0	0	0	0
RE12|622974	7159	24	6	0	Low-quality	Genome-fragment	8.45	HMM-based (lower-bound)	Virulent	0	0	0	0	0	0	0	0	0	0	0	0	6.07916	0.385238	41.7957	0	3.01143	0	0	0	5.05391	2.10417	0	0.539182	0	0	0	0	0	0	0	0	0	0	0	0
RE1|147238	22467	41	7	0	Low-quality	Genome-fragment	18.41	AAI-based (medium-confidence)	Virulent	60.9143	28.0233	14.9196	130.479	16.4432	45.7549	21.482	127.352	38.679	11.8161	8.14034	136.841	59.8885	17.9221	1.7239	233.379	28.5474	16.1086	11.8625	175.142	7.16352	18.103	5.76336	58.7583	56.7202	34.2012	23.2216	165.303	41.0984	14.2083	17.0004	125.919	52.0885	15.2436	2.76786	125.162
RE1|2287852	5487	13	0	1	Low-quality	Genome-fragment	11.67	AAI-based (medium-confidence)	Virulent	28.8584	31.8733	17.1051	105.502	37.0305	19.4647	12.9777	142.386	27.4516	15.5514	44.9973	79.5034	15.2022	10.0526	3.59854	188.767	26.5212	15.0989	40.0004	113.526	5.22968	9.15116	25.5651	64.0169	52.0845	30.6656	27.7934	118.951	44.3276	33.3979	24.8605	122.574	50.0435	45.7719	33.0553	131.841
RF6|2005623	7444	8	0	7	Low-quality	Genome-fragment	14.59	AAI-based (high-confidence)	Virulent	0	0	0	0	0	0	0	0	0	0	0	0	0	0	0	0	0	0	0	0	0	0	0	0	129.651	224.531	50.6775	87.6793	30.8588	41.2942	108.116	46.3699	337.255	44.4736	143.406	182.4
RD2|417388	7943	7	6	0	Low-quality	Genome-fragment	10.87	HMM-based (lower-bound)	Virulent	2.8479	9.68791	1.68802	2.11862	170.149	5.0423	3.98443	0	15.3166	6.56506	0	6.7997	0.456594	2.08328	0	0.427539	11.8746	1.09792	1.97373	0.857084	31.1001	5.05727	0	2.91578	0	1.41225	0	0	0	0	0	0	0	0	0	0
RE5|1484238	7505	8	1	0	Low-quality	Genome-fragment	12.24	AAI-based (medium-confidence)	Virulent	24.8664	25.1672	8.03942	39.9122	84.0918	8.00486	27.4103	15.167	45.5439	13.2648	9.74758	100.198	146.905	3.3073	1.11309	20.3621	4.30889	41.8319	45.9561	166	36.4062	58.2076	11.5022	100.293	39.3282	0	4.27792	1.83732	3.60094	16.541	2.72638	6.63816	53.1389	0.760554	29.6911	26.1984
RE5|533239	10769	15	7	0	Low-quality	Genome-fragment	34.39	AAI-based (medium-confidence)	Virulent	194.826	20.7872	6.22526	19.3768	26.0146	42.1498	66.8585	30.2686	73.1632	10.1247	28.0218	25.8482	113.156	12.0366	21.9317	8.19895	20.5198	49.803	23.2925	127.066	20.9694	48.0256	13.0259	109.323	35.6741	15.1039	74.533	9.38993	12.5476	14.8211	10.7669	32.0529	34.6045	2.65018	25.0228	21.3583
RE3|1164683	12896	23	3	0	Low-quality	Genome-fragment	6.2	HMM-based (lower-bound)	Virulent	0	0	0	0	0	0	0	0	0	0	0	0	0	0	0	0	0	247.504	0	0	0	0	0	0	0	0	0	0	0	0	0	0	0	0	0	0
RE12|2020471	14125	32	3	0	Low-quality	Genome-fragment	11.86	HMM-based (lower-bound)	Virulent	0	0	0	0	0	0	0	0	0	1.34246	0	0	0	0	54.4101	0	0	0	0	0	0	0	0	0	0	0	0	0	0	0	0	0	0	0	0.366876	0
RE5|1278700	6319	8	1	0	Low-quality	Genome-fragment	8.25	AAI-based (medium-confidence)	Virulent	1.78991	2.21413	0	15.9786	0.974389	0	7.51266	0	1.83363	0	0	1.31496	43.0455	4.36449	0	3.22451	0	27.6018	0	144.366	3.94878	4.76775	0	171.04	0	0	0	1.45478	1.4256	0	0	0	0	0	0	1.17417
RE6|644445	8271	23	4	0	Low-quality	Genome-fragment	9.65	AAI-based (high-confidence)	Virulent	0	0	3.24216	0	1.48886	0	3.82642	0	0	0	0	0	1.75395	37.0124	0	12.3175	6.51639	11.071	11.3727	3.29238	61.5438	35.8183	140.898	0	0	0	0	0	0	0	0	0	0	0	0	0
RF11|20215	14900	31	3	1	Low-quality	Genome-fragment	18.63	HMM-based (lower-bound)	Virulent	105.513	90.6135	57.5913	76.5738	70.2495	193.087	83.3689	155.22	105.758	85.5848	46.0291	76.958	97.1183	28.3196	5.50459	107.12	141.073	97.7431	45.2432	77.4446	21.7705	86.271	127.458	105.438	325.752	257.475	158.913	167.814	207.374	157.506	154.72	177.926	314.606	163.194	58.0815	290.559
RF1|303613	5943	16	2	1	Low-quality	Genome-fragment	9.65	HMM-based (lower-bound)	Virulent	12.3705	23.5422	11.2805	44.7392	11.9144	22.464	29.2892	82.7074	29.2445	6.38139	21.5417	20.9723	8.54352	11.1375	0.511142	136.569	29.0208	4.40222	38.2502	38.9476	8.81709	8.449	31.774	11.6911	112.731	38.694	113.448	287.708	234.19	505.301	148.047	1170.61	57.2046	59.5479	61.91	553.067
RE9|518850	16910	24	3	0	Low-quality	Genome-fragment	20.3	AAI-based (medium-confidence)	Virulent	12.7083	24.8216	15.858	19.3061	61.7173	24.869	27.6057	7.95529	12.3335	9.25127	11.3562	27.0259	63.9127	5.05592	3.05389	6.82803	4.30284	102.628	21.3234	70.6547	8.92737	32.9602	2.55244	321.173	0.831173	7.96037	0	0	0	1.39833	0	2.52527	0	0	0	0.438769
RF9|336491	13766	39	2	0	Low-quality	Genome-fragment	19.47	HMM-based (lower-bound)	Virulent	19.3081	15.7535	4.86996	63.8116	8.49819	7.75844	2.29902	117.266	24.8298	2.75495	4.64994	58.8516	28.1897	2.20377	0.441336	173.67	20.1634	6.96852	2.27768	39.0685	5.16594	7.29513	0.783848	31.9658	45.2645	8.96356	2.33225	98.8323	9.48868	4.29422	1.98184	75.2239	15.1976	11.61	5.64666	99.4416
RE12|2100168	6481	8	0	0	Low-quality	Genome-fragment	4.39	AAI-based (medium-confidence)	Virulent	0	0	2.06881	0	0	0	0	0	0	0	0	0	1.11919	0.851079	31.2865	0	0	0	0	0	0.385008	0	0	0	0	0	0	0	0	0	0	0	0	0	0	0
RE12|277285	17699	15	1	1	Low-quality	Genome-fragment	25.51	HMM-based (lower-bound)	Virulent	0	0	1.51511	0	0.347882	0	0.894071	0	0.654652	0.535688	1.03333	0.469475	1.22947	2.02571	56.0379	0	0.60904	0	0	0	1.40982	1.70221	1.21933	0	0.529414	0	0.906995	0	0	1.33599	1.54144	0	0	0	0.585584	0.838418
RE6|875595	7026	11	2	0	Low-quality	Genome-fragment	2.37	HMM-based (lower-bound)	Virulent	22.5371	0	53.4334	0	28.9192	0	0	0	19.7894	1.34944	0	5.91321	0	0	0.216177	0	0.767108	6.82669	0	0	62.8604	0	0	0	2.66726	0	0	0	2.56429	1.68273	3.883	0	0	0	0	0
RD12|964499	28281	34	3	2	Low-quality	Genome-fragment	38.06	HMM-based (lower-bound)	Virulent	12.7978	85.8335	206.944	42.2474	46.6996	21.9508	91.7635	49.5794	32.571	1.84386	5.17348	69.0453	6.9249	0.487592	22.6102	67.6043	61.9375	13.7221	15.2444	27.8032	4.32328	62.497	2.09849	27.98	22.1985	15.8658	253.727	52.4956	53.6724	1.6722	80.3092	47.0595	46.2348	72.0534	5.49711	73.9833
RE9|1305019	7187	14	2	0	Low-quality	Genome-fragment	2.97	HMM-based (lower-bound)	Virulent	0	0	0	0	0	5.5727	0	0	0	0	0	4.62459	2.01849	0	10.0384	0	2.24977	2.42682	2.18134	0	0	0	0	182.071	0	0	3.35041	0	0	0	0	0	0	0	0	2.06472
RE7|1295286	5034	9	0	0	Low-quality	Genome-fragment	6.27	AAI-based (medium-confidence)	Virulent	106.723	59.7554	173.126	43.4577	104.576	631.184	116.308	33.9178	23.0168	99.8213	245.232	57.7718	24.4951	112.311	11.4654	14.1666	107.066	94.4146	300.528	8.1142	6.19596	230.414	320.455	17.6361	121.919	182.724	20.7278	58.4362	160.161	239.557	124.649	31.1036	79.2228	121.325	238.827	84.0119
RD12|577208	5944	8	0	0	Low-quality	Genome-fragment	7.56	AAI-based (medium-confidence)	Virulent	7.61132	151.821	328.207	9.05958	51.7931	65.1345	62.5619	11.316	3.89861	2.39262	3.07687	58.0137	10.9827	0	6.64373	7.99852	0.906747	15.4052	0	0	0	44.7722	29.0456	4.54577	17.3404	13.2104	27.0069	1.54656	7.57769	3.97808	45.8983	8.38146	14.2987	24.9675	8.71825	4.36887
RD11|339114	5244	2	0	2	Low-quality	Genome-fragment	1.83	AAI-based (medium-confidence)	Virulent	29.1172	268.136	201.989	35.2993	165.553	49.6437	42.246	20.7197	17.6761	6.32799	3.48758	80.8106	9.68233	5.25919	6.08239	5.18069	23.1252	8.31502	0	0	4.28244	16.2779	28.8075	2.94432	5.36047	7.48688	27.5508	7.01201	8.58921	4.50909	15.6075	6.78591	12.4673	18.5041	14.823	8.48922
RE11|1532822	26173	37	3	1	Low-quality	Genome-fragment	10.04	HMM-based (lower-bound)	Virulent	0	0.534562	0	0	0.235249	0	0	0	0	2.17349	0	0	0.969971	174.076	0.0580315	0	0.205926	0	0	0	0	1.15109	0	0	0	0	0	0.35123	0	0	0.521185	0	0	0.218086	0	0
RE6|1299173	5106	13	1	0	Low-quality	Genome-fragment	2.36	HMM-based (lower-bound)	Virulent	49.8403	8.22039	7.87777	8.56898	80.1902	23.5317	27.8922	0	49.923	42.7079	0	4.88204	191.067	3.78093	1.78479	5.32071	8.4445	78.5657	46.0555	19.9995	60.5972	63.921	4.22658	148.927	8.25802	1.09846	0	0	1.76427	31.259	0	0	12.8042	0	15.2236	2.17967
RE6|374885	5521	10	1	0	Low-quality	Genome-fragment	3.21	HMM-based (lower-bound)	Virulent	0	0	0	0	5.57613	0	0	0	4.19731	0	0	6.0201	1.97069	3.99626	0.687764	0	1.95244	6.31827	0	0	56.4942	1.81896	0	20.9745	0	0	0	0	0	4.28286	0	0	0	0	0	0
RD12|1298445	52848	68	5	2	Medium-quality	Genome-fragment	66.73	AAI-based (medium-confidence)	Virulent	14.3392	95.0425	260.558	55.7882	52.0204	21.8514	123.215	58.9379	41.6566	2.78076	4.49886	96.0669	11.3232	0.678417	31.4705	84.7572	80.2622	17.6568	21.952	34.0082	5.90192	79.8108	2.04179	43.8969	26.2408	15.8133	319.703	74.9711	74.7458	3.80314	111.894	62.891	62.9684	88.6738	1.3728	104.383
RE5|1526377	8310	13	3	0	Low-quality	Genome-fragment	9.94	HMM-based (lower-bound)	Virulent	17.0133	23.571	6.4539	43.3361	11.8549	32.934	3.80846	21.1692	18.126	13.1207	4.40166	6.99936	48.88	15.2665	0.36555	37.1878	4.21577	8.39547	29.2417	471.877	6.75606	9.06361	4.54472	36.6956	12.4033	13.4988	0	1.65934	9.21433	12.0932	7.38681	8.56445	14.9481	6.86878	33.6745	6.69637
RE9|1631576	8295	12	2	0	Low-quality	Genome-fragment	24.53	AAI-based (medium-confidence)	Virulent	6.81762	1.68669	0	4.46317	2.9691	0	0	0	0	2.28599	4.40962	1.00172	110.179	2.65984	0.457763	1.63759	4.54827	25.2319	10.3948	88.2267	20.9064	7.86933	0	194.513	0	3.3808	0	0	0	0	1.64448	0	1.57633	0	0	0
RE6|1566707	7436	3	1	0	Low-quality	Genome-fragment	16.25	HMM-based (lower-bound)	Virulent	0	0	0	0	0	0	0	0	0	0	0	1.11743	0	1.48355	0	5.48027	1.08722	1.17278	0	0.915521	208.887	0	0	0	0	0	0	0	0	0	0	0	0	0	0	0
RE12|480598	5932	9	3	0	Low-quality	Genome-fragment	13.88	AAI-based (medium-confidence)	Virulent	0	0	16.9521	2.26948	21.7971	0	0	0	0.976625	0	1.54154	2.10112	1.83415	0	43.3996	1.14496	11.8116	1.47013	0	0	1.0516	3.38587	10.0046	0.650709	0.789792	0	0	0	0	0	2.29956	0	0	0.962232	0	0
RF2|1742813	5545	12	2	0	Low-quality	Genome-fragment	8.67	HMM-based (lower-bound)	Virulent	0	0	0	0	2.776	0	0	0	0	0	0	0	0	0	0.273915	0	3.88797	0	0	0	0	1.81109	1.94598	0	3.37966	43.4943	57.9005	38.1304	328.98	4.26433	84.8718	0	54.2363	236.759	13.0838	8.0284
RF10|2277837	6782	9	1	0	Low-quality	Genome-fragment	4.77	HMM-based (lower-bound)	Virulent	152.596	112.432	10.8735	21.3392	29.9596	102.362	26.8325	83.9192	186.221	64.3074	6.7417	12.2519	110.16	49.205	0.559886	13.5197	6.35766	43.7197	47.3879	0	11.0376	11.846	141.603	31.8726	158.885	33.0802	9.46795	31.1756	77.0399	118.542	78.4427	14.6917	110.86	26.0906	6.8769	37.1964
RE12|963406	12021	15	4	1	Low-quality	Genome-fragment	16.58	AAI-based (high-confidence)	Virulent	0	0	0	0.559959	1.0244	0	0	0	0	3.94358	0	0.345613	0	6.19448	42.4538	0	0.672536	0.725463	0	0	0.415146	0	0	0	0	0.466579	0	0	0	0	4.53905	0	0	0	0	0
RF9|967577	7919	18	1	0	Low-quality	Genome-fragment	14.84	AAI-based (medium-confidence)	Virulent	9.99785	0	0	32.3006	3.49883	0	0	18.9476	0	0	1.15475	147.424	1.83191	0	0	107.209	0	0	1.97971	10.3162	0	0	0	53.618	1.77486	0	0	22.6365	1.13756	0	1.72256	43.5885	1.65118	0	0	99.315
RE12|875318	5279	7	1	0	Low-quality	Genome-fragment	11.78	AAI-based (medium-confidence)	Virulent	0	0	0	0	1.16635	0	0	0	0	0	0	0	0	1.5673	40.5681	0	0	0	0	1.2896	0.472672	0	0	0	0	0	0	0	1.70645	0	2.58401	0	0	0	0	0
RE10|2197701	8685	10	7	0	Low-quality	Genome-fragment	19.35	AAI-based (high-confidence)	Virulent	3.90688	18.5259	13.8943	18.9886	7.44389	6.14869	10.9321	14.2978	10.0058	15.2834	3.1587	8.61061	293.98	12.3844	1.48651	3.1281	3.72346	40.6669	27.0765	5.87894	2.29843	4.04706	2.48485	135.556	1.61832	0.645797	24.0285	1.05846	2.07446	10.2097	32.1981	15.9796	7.52772	4.60054	8.95013	16.6588
RE6|1980613	5668	7	0	7	Low-quality	Genome-fragment	3.25	AAI-based (high-confidence)	Virulent	74.8308	76.5216	66.2356	131.823	36.9343	69.4839	124.237	38.3395	127.764	29.2731	70.9872	76.2315	142.689	19.9497	16.4802	22.7674	29.0025	28.4641	31.8082	21.6197	63.8337	17.7179	35.2194	19.0685	44.6352	16.8223	35.4025	18.6515	19.8667	56.3191	20.4567	25.7409	72.6682	35.2467	44.7996	21.599
RD2|1514008	5373	9	3	0	Low-quality	Genome-fragment	8.85	AAI-based (medium-confidence)	Virulent	32.6283	14.3218	6.23859	36.331	111.157	12.4235	30.9238	21.1852	53.9116	12.3521	5.10578	119.079	103.274	4.61963	0.282684	10.1126	10.0311	38.1423	37.9313	98.8293	30.6506	48.5957	0	94.1114	35.7504	0	1.49385	0	3.3532	31.9061	5.0776	3.97379	77.8747	1.06234	35.6856	29.6894
RE10|593674	31568	53	21	0	High-quality	High-quality	100	AAI-based (high-confidence)	Temperate	3.40373	27.2571	19.7501	1.06615	32.4749	7.40088	2.757	3.7697	4.03743	12.1638	2.3174	15.5298	928.739	8.99854	9.38221	0.107576	15.5367	4.28194	8.19423	0	3.55695	16.2242	1.02545	5.38014	6.38169	2.66508	11.6959	1.74723	4.56582	2.24712	7.12988	2.02906	7.45571	35.6205	11.1627	1.17517
RE12|729886	7686	9	0	3	Low-quality	Genome-fragment	4.9	AAI-based (medium-confidence)	Virulent	8.82937	12.7424	31.4004	2.62735	63.6865	8.68484	3.08824	0	25.6276	8.63492	0	29.7299	57.567	38.3942	40.3132	0	9.46669	14.1829	0	3.54297	74.0195	20.2522	0	32.1416	3.04778	0	0	0	0.586024	0	3.54957	0	0	0.742644	0	0
RF1|1780977	9478	13	3	0	Low-quality	Genome-fragment	18.29	AAI-based (medium-confidence)	Virulent	22.0767	14.0236	1.41464	23.7917	1.62407	4.22568	20.0348	49.6765	2.44496	13.5045	15.4369	52.6012	3.82646	12.2212	1.68264	15.0485	17.9126	5.52065	12.4055	2.15483	2.50103	7.94668	33.0157	5.29437	105.288	79.8882	73.6761	278.362	135.439	135.343	103.624	105.502	31.0405	59.621	36.6325	107.638
RD7|2222159	6737	10	2	0	Low-quality	Genome-fragment	7.87	AAI-based (high-confidence)	Virulent	0	0	0	0	27.418	0	0	0	0	216.728	1.35735	4.93349	20.4565	16.3748	2.81813	0	2.40005	0	0	0	42.7787	2.98129	0	0	0.69542	0	0	0	1.33715	0	1.01239	0	0	0	0	8.81055
RE6|389973	7121	7	2	0	Low-quality	Genome-fragment	8.91	AAI-based (high-confidence)	Virulent	1.58832	0.982383	1.88288	0	18.5899	0	0	0	11.3898	0	0	0	5.093	5.80941	31.4607	0	6.43343	1.83699	1.10078	0.47801	55.7145	0	0	0	0	0	0	0	0	0	0	0	0.918105	0	0	0
RE4|1143101	13934	14	1	9	Low-quality	Genome-fragment	6.28	HMM-based (lower-bound)	Virulent	224.033	238.975	248.741	88.8871	71.3637	189.227	264.607	112.882	218.695	166.366	303.196	78.119	54.3982	64.7223	29.1585	79.4515	60.728	149.582	411.791	47.3918	30.3533	122.162	237.353	63.1607	102.214	162.216	176.842	65.3137	106.35	205.334	167.894	54.9077	165.158	132.724	212.358	61.2352
RE12|749859	5612	7	4	0	Low-quality	Genome-fragment	12.22	AAI-based (medium-confidence)	Virulent	0	0	0	0	0	0	0	0	0	0	0	0	0	0	39.9201	0	0	0	0	0	0	0	0	0	0	0	0	0	0	0	0	0	0	0	0	0
RE10|1209094	39951	69	11	1	Low-quality	Genome-fragment	25.78	HMM-based (lower-bound)	Virulent	9.34255	5.2531	0.839026	2.8643	10.5571	8.52128	3.76285	0	7.39557	2.96649	5.4934	7.17551	148.696	3.65873	2.12901	1.61505	6.61048	51.4066	18.2472	7.07177	25.8886	26.7709	1.89065	276.522	4.69079	5.61562	0.401815	0.2301	0	1.47967	0	0.267217	0.163646	0	0	0.371434
RD12|508955	5647	9	3	0	Low-quality	Genome-fragment	15.14	AAI-based (medium-confidence)	Virulent	0	0	332.409	0	23.9875	0	0	0	7.1814	0	6.47738	1.47144	5.13791	1.95355	4.43796	0	0	1.54432	0	0	0.220935	0.889187	0	0	1.65931	9.93226	7.10683	0	4.78574	9.42143	84.5466	0	16.2085	6.06477	3.67071	0
RE12|512049	19063	28	2	0	Low-quality	Genome-fragment	38.05	AAI-based (medium-confidence)	Temperate	0	0.73394	0.351675	0	3.3914	0	0	0	0	0.497358	0	0	0.760997	0.289348	67.087	0	1.97912	2.05862	0.411197	0	0.850813	8.95568	0	0.404974	0	0	0	0	0	0	0	0	0	0	0	0.194607
RE12|1387654	7056	12	1	1	Low-quality	Genome-fragment	6.41	HMM-based (lower-bound)	Virulent	0	0	1.90022	0.476989	0.872614	0	0	0	0	0	0	0	0.513991	3.51776	59.8417	0	9.16616	0	0	0.482413	2.29862	0.711627	0	2.73526	2.65592	0	0	0	0	0.837787	4.83311	0	0	0	0	2.62882
RE12|1604044	5519	4	1	0	Low-quality	Genome-fragment	4.14	HMM-based (lower-bound)	Virulent	0	27.8859	91.1033	2.43931	16.7344	6.04744	0	0	14.6959	0.858955	6.62761	5.26949	1.31427	0.499714	21.466	1.84596	64.9421	1.58014	7.10151	0	5.87753	20.9256	0	12.5893	0	2.03252	93.0772	9.16109	13.058	2.14221	3.70746	0	21.3229	22.7532	4.6948	0.672185
RD8|1290502	19015	44	3	0	Low-quality	Genome-fragment	21.83	HMM-based (lower-bound)	Virulent	24.09	5.88634	2.11538	3.18598	5.01899	13.3398	8.73803	2.17681	13.1009	16.7036	645.858	5.68078	3.81459	19.1452	0.319507	4.82201	6.37751	5.0449	32.5666	1.43209	2.03398	3.43288	52.7748	1.01499	33.2622	20.0576	6.75379	16.6789	34.3469	46.0106	121.955	7.11144	15.8159	44.4269	43.8771	41.5559
RE12|411782	6940	17	4	0	Low-quality	Genome-fragment	16.58	AAI-based (high-confidence)	Virulent	8.14872	18.1441	5.79595	1.45488	21.2928	7.69472	10.2606	0.745533	5.00865	2.04924	0	4.19054	22.9936	0.397395	72.2224	1.95732	1.55323	1.2566	2.25898	5.88572	0.179772	5.78817	0	1.11239	0.675079	0	3.46965	0	1.94705	0	0.98278	1.53827	0	18.0944	1.49341	0.534552
RE8|298802	5368	5	1	1	Low-quality	Genome-fragment	1.18	HMM-based (lower-bound)	Temperate	666.868	549.948	348.437	239.507	223.667	483.726	565.991	364.339	402.555	470.701	810.871	230.64	270.923	309.804	58.57	246.725	277.618	395.587	714.065	246.035	121.554	313.36	621.135	253.115	466.061	546.456	475.487	274.001	465.689	692.676	443.434	259.2	496.914	532.729	605.289	327.578
RE7|151485	9166	24	4	0	Low-quality	Genome-fragment	20.53	AAI-based (medium-confidence)	Virulent	3.70186	9.15848	5.85118	0.734373	0	0	1.7264	0	0	1.03438	0	2.71958	1.58269	7.22126	0.331412	0	0.58801	1.42714	1.71038	0.742725	0.272228	259.115	0	0	1.02227	1.22382	1.75135	2.00583	0.982802	39.9856	4.46465	0	0	2.49093	0	4.85681
RE3|1422281	10839	8	5	0	Low-quality	Genome-fragment	24.83	AAI-based (high-confidence)	Virulent	0	0	0	1.24205	0.568056	3.07924	0	0	1.06898	2.62418	0	0	16.73	0.254444	0.0700645	5.32623	1.24313	232.522	7.95508	33.6026	8.74795	50.0317	9.45745	6.05407	0	0.51746	1.48103	0	0	0	0	0.656616	1.80953	0	0.9562	0
RE6|173771	5667	6	3	0	Low-quality	Genome-fragment	5.43	AAI-based (medium-confidence)	Virulent	0	0	0	0	2.17299	0	0	0	0	5.01913	0	0	62.0773	0.486663	0.268018	0	0.951068	0	0	1.20131	56.3597	0	0	1.36227	0	0	0	0	0	0	27.6815	0	0	0	0	0
RE8|2476967	17637	20	6	3	Low-quality	Genome-fragment	38.72	AAI-based (medium-confidence)	Virulent	243.369	174.919	83.2439	79.1936	66.679	145.713	154.769	149.321	135.332	151.326	236.946	93.0472	96.8525	117.435	13.5205	83.7577	84.9542	108.534	213.333	93.0251	40.4625	88.5414	204.956	98.7051	166.555	156.461	136.528	111.541	125.648	204.12	121.428	97.6543	177.93	148.549	208.613	103.278
RE12|916893	16132	21	4	0	Low-quality	Genome-fragment	37.02	AAI-based (medium-confidence)	Virulent	0	0	0	0	0.763348	1.65514	9.80918	0	0	4.11406	3.40111	0	11.6904	1.02576	38.0845	0	0.3341	30.273	42.2739	0	0	1.86756	2.00666	16.7493	0.580839	2.78143	0	0	0	0	1.69117	0	0	0	0	0
RE6|771645	5459	6	1	1	Low-quality	Genome-fragment	7.72	HMM-based (lower-bound)	Virulent	0	0	0	0	0	0	0	0	0	0	0	0	0	1.01041	0	2.48833	0	71.8878	0	1.87062	66.0491	0	0	88.3863	0	2.05486	0	0	0	0	0	0	2.39525	0	0	0
RE4|1540826	5327	10	2	0	Low-quality	Genome-fragment	9.04	AAI-based (medium-confidence)	Virulent	21.2323	6.56613	2.51698	15.1634	1.73376	35.0863	2.97056	19.4256	16.3131	6.2294	20.5995	11.6988	3.4041	11.9077	0.712812	14.6624	5.05885	0	266.34	29.3936	2.57627	17.9094	8.10246	10.1446	24.6257	1.05289	12.054	19.8454	10.1465	17.7554	16.6447	26.7207	20.8641	4.28606	22.3745	25.0709
RF8|1678613	5802	11	4	0	Low-quality	Genome-fragment	6.3	HMM-based (lower-bound)	Virulent	150.104	90.4285	49.6848	79.4711	34.4894	130.006	83.1846	55.2892	120.819	184.655	152.88	80.1995	41.2554	90.3145	6.67544	49.751	48.3048	78.911	214.813	52.801	30.1046	61.4457	172.96	61.8719	118.701	173.038	143.873	83.1815	104.803	187.47	151.645	45.9996	136.346	157.407	209.893	69.6945
RE12|1032469	6720	8	1	0	Low-quality	Genome-fragment	3.01	HMM-based (lower-bound)	Virulent	0	0	0	0	9.62056	0	0	0	1.72421	0	0	0	2.69845	3.28324	37.9715	0	0.802039	0	0	0	21.7219	4.48325	0	1.72322	0	0	0	0	0	0	0	0	0	0	0	0
RF12|1900979	38147	37	4	3	Low-quality	Genome-fragment	39.56	AAI-based (medium-confidence)	Virulent	12.7493	64.3678	173.105	36.7028	37.769	17.4985	82.5493	39.7405	25.6658	1.61553	4.07517	59.6831	8.17622	0.722972	18.594	58.3988	54.9609	14.4024	14.5895	25.3417	3.59761	57.2585	1.83862	28.4337	18.2995	10.4391	218.404	43.0153	48.6466	1.85957	69.5512	40.6721	33.4201	55.0641	3.66785	63.8932
RE12|1544774	26120	45	11	0	Medium-quality	Genome-fragment	57.3	AAI-based (medium-confidence)	Virulent	1.51556	6.15994	77.5116	0	14.7329	0	1.21165	0	2.66156	13.7934	0.700187	17.9737	2.36042	46.3525	98.8247	0	6.80935	0.500811	1.50051	0	9.07533	2.30685	0	0.14778	0.896832	0	0.614583	0.703885	0	0	21.1508	0	0	7.64849	1.19038	0.284057
RE5|391118	33936	58	1	4	Low-quality	Genome-fragment	21.66	HMM-based (lower-bound)	Virulent	1.1665	0.412279	0	35.4058	0.181435	0	0.466294	94.9848	1.36571	0.558766	0	66.4768	2.35113	0.162537	0	47.2326	0	0.513955	0	259.085	0.0735277	0	0	121.478	3.58944	0.330548	0	22.4834	0.265451	0.348387	0	77.7013	0	0.336395	0	31.2647
RD2|394795	6978	13	4	0	Low-quality	Genome-fragment	13.4	AAI-based (high-confidence)	Virulent	0	2.00503	9.60732	0	175.591	0	10.2047	2.96589	3.32092	1.35872	0	4.76311	0	0.790462	6.74758	0	16.2201	3.12439	2.24668	1.95122	26.6402	0	0	4.97851	0	0	4.60101	0	0	1.6943	3.90971	0	13.1169	0	0	0
RE2|1078001	13449	15	3	1	Low-quality	Genome-fragment	10.79	HMM-based (lower-bound)	Virulent	88.3036	88.9463	22.4314	35.5357	95.4545	61.0488	16.4725	77.3273	96.9218	50.7578	11.5589	56.2228	60.1353	11.2786	0.564674	101.002	135.454	20.1015	6.99411	9.11151	16.1414	25.0147	11.6337	19.2297	107.642	64.2239	20.2914	96.3772	108.175	39.1194	16.7355	65.884	102.571	101.011	9.63292	91.8552
RF11|1379822	8233	8	6	0	Low-quality	Genome-fragment	7.64	AAI-based (medium-confidence)	Virulent	36.4055	75.623	47.2284	11.8551	30.2885	75.4027	51.8951	21.9956	42.2204	36.2755	59.9781	19.1759	24.6686	23.4489	6.36471	9.48703	36.3329	33.3663	53.3177	6.61515	6.36463	42.6924	36.0425	7.03268	60.8891	111.725	196.932	37.4052	79.3278	63.9034	99.412	10.3735	60.3516	118.555	69.8671	33.795
RF9|2391999	5747	9	3	0	Low-quality	Genome-fragment	9.72	AAI-based (medium-confidence)	Virulent	10.8243	27.9968	38.4951	17.569	39.105	17.4226	22.0277	18.0059	14.1129	8.24878	27.0499	36.8689	93.3974	89.2593	38.8502	32.4999	172.092	29.5903	95.4768	61.5985	14.1109	83.0029	20.6534	194.78	110.869	67.3401	198.322	72.7805	65.0508	111.09	29.6698	107.121	100.109	35.7554	18.9359	108.447
RF9|934320	8463	13	1	0	Low-quality	Genome-fragment	15.56	AAI-based (medium-confidence)	Temperate	41.4301	53.7293	9.50583	50.5064	18.5522	44.1698	36.4612	132.667	48.603	25.2069	21.6104	70.6918	65.995	13.687	0.448676	121.986	50.3115	26.2768	26.8605	45.4498	3.39067	25.5126	19.1252	36.4883	117.361	55.0072	63.544	196.064	48.9643	41.2116	37.0723	173.659	93.4748	44.5144	9.79724	161.753
RE11|592712	7332	22	4	0	Low-quality	Genome-fragment	9.11	HMM-based (lower-bound)	Virulent	1.54261	1.90822	0	0	3.77895	0	1.07912	9.17376	0.790145	0	0	1.13328	0	119.615	1.13935	0	0.735093	1.18941	1.0691	2.78552	0	0	0	0.52646	1.27797	0.764968	1.09472	0.626892	8.60045	3.225	5.58142	2.91205	4.45842	2.3355	1.41356	5.05973
RE6|906972	5149	8	6	0	Low-quality	Genome-fragment	12.04	AAI-based (medium-confidence)	Virulent	0	0	0	0	0	0	0	0	0	0	0	0	0	0	0.294981	0	1.04675	63.5132	138.535	9.25514	79.7177	0	0	76.4654	0	0	0	0	0	0	0	0	0	0	0	0
RE5|267878	13978	25	3	0	Low-quality	Genome-fragment	14.72	HMM-based (lower-bound)	Virulent	35.1984	20.5192	1.43883	24.0781	96.6874	30.5631	33.3962	9.62398	100.714	6.78291	13.7383	10.4029	77.3189	5.52452	2.28187	12.6334	15.0378	181.865	78.5099	145.624	27.223	16.8835	0.77196	151.606	4.69242	15.2477	1.14844	2.63063	6.12244	5.92073	1.95178	5.85536	11.2253	3.26682	3.33661	0.530804
RE12|1101103	5220	11	7	0	Low-quality	Genome-fragment	8.35	HMM-based (lower-bound)	Virulent	0	0	0	0	123.261	0	0	0	0	5.44893	0	1.59181	0	0	35.4982	0	19.1014	0	0	0	1.43404	0	0	0	0	0	0	0	0	0	2.61321	0	1.25246	2.18696	0	2.84275
RF4|1305437	6022	11	0	0	Low-quality	Genome-fragment	5.87	AAI-based (high-confidence)	Virulent	113.63	90.6099	41.1902	105.071	126.272	140.775	103.795	88.4959	40.4052	103.912	214.109	80.7191	49.9864	70.986	9.71041	78.3853	75.6277	67.3392	137.977	61.0465	17.61	50.029	219.5	60.2525	109.696	127.598	38.6528	111.436	115.185	186.511	121.188	59.6831	124.851	89.098	170.385	72.6927
RE12|760059	21081	27	3	1	Low-quality	Genome-fragment	24.61	AAI-based (high-confidence)	Virulent	3.21913	1.65921	12.7204	0	17.2322	0	0	0	1.09925	6.0716	0	0	1.03223	0.130825	51.0825	0	0.511333	0	0	0	0.295911	0	0	0.732414	4.44481	0	0	0	0	0	0.647075	0	0	0	0	0
RE11|1628750	12141	18	10	1	Low-quality	Genome-fragment	31.85	AAI-based (medium-confidence)	Virulent	2.32897	6.91431	25.9523	0.277212	16.2284	1.09961	3.25841	0	3.3402	6.63782	0.753187	2.39538	15.5333	117.441	177.332	0.279709	5.77103	2.51402	6.45635	0	31.1365	12.8209	1.33314	9.22001	1.54355	0	1.32221	0	0	0	23.5945	0	0	1.88056	0.853657	2.13891
RE12|1705892	19646	34	2	1	Low-quality	Genome-fragment	8.62	HMM-based (lower-bound)	Virulent	0	0.71216	1.36496	0	1.25362	0.679545	1.61093	0	0.589773	0.965198	0	0.422948	2.95366	3.22876	49.7112	0	1.92039	0	0	0.693048	1.2701	0	0	0.392956	0.476947	0	0	0	0.917068	0	0	0.72453	0	0	0	0.377664
RE5|290915	5812	4	1	0	Low-quality	Genome-fragment	3.19	HMM-based (lower-bound)	Virulent	8.75721	2.40728	0	6.36992	7.41571	0	5.44534	0	1.99358	4.07826	3.14675	2.85934	124.177	4.2707	3.52798	2.92149	1.85468	11.2536	13.487	118.305	9.23049	26.7823	1.85658	67.7427	8.06099	0	0	0	0	0	0	0	4.49954	0	0	0
RE10|690703	5328	13	1	0	Low-quality	Genome-fragment	2.89	HMM-based (lower-bound)	Virulent	13.7984	5.25192	2.51651	0	50.8474	6.26423	16.335	0	51.1049	6.22823	10.2978	0	174.257	1.55288	0.285071	0	6.06948	69.5634	20.5971	0	14.0498	2.82727	4.05047	4.34685	10.5519	0	0	0	0	6.65701	0	0	0	0	0	0
RE12|807083	7542	8	4	0	Low-quality	Genome-fragment	18.19	AAI-based (medium-confidence)	Virulent	0	0	0	0.446252	0	0	0	0	0	0	0	0	0.96174	4.3881	47.7287	0	22.1534	0	4.15733	0	0	0	0	0	1.24239	0	0	0	0	0	3.61734	0.943657	0	0	0	2.95131
RD2|821252	6629	12	5	0	Low-quality	Genome-fragment	9.87	HMM-based (lower-bound)	Virulent	26.4462	283.874	313.507	8.63113	100.777	25.1741	35.8067	30.4399	20.9745	0.715126	2.75892	165.458	1.6413	5.4085	2.63492	2.56143	13.4153	9.20886	1.18248	1.02697	1.50565	11.362	10.5805	0	6.36075	4.23046	20.5838	2.08012	25.1402	4.45876	14.4044	2.14725	6.90373	21.5265	7.03562	10.633
RF1|327616	5761	9	7	0	Low-quality	Genome-fragment	9.87	HMM-based (lower-bound)	Virulent	87.3657	25.5002	22.11	230.179	16.5659	11.5868	8.24032	17.9622	54.3031	2.46862	0	137.742	40.9195	5.26595	16.6096	35.9577	8.88772	10.5963	6.8032	14.7713	9.3122	7.84433	28.0953	4.69016	84.5764	24.3393	51.5499	36.7007	53.1651	11.2872	23.6782	23.4723	38.5846	31.7054	23.3875	41.8567
RE5|1463474	5215	10	0	1	Low-quality	Genome-fragment	6.91	AAI-based (medium-confidence)	Virulent	4.33765	0	0	25.1696	2.36133	12.7999	3.03436	0	0	3.63611	0	0	34.0766	9.51919	0	14.3261	0	30.9367	0	152.083	1.43542	1.92569	0	128.05	0	0	0	1.76275	0	2.26708	0	1.36473	0	0	0	0
RE6|1500881	16740	14	1	2	Low-quality	Genome-fragment	8.71	HMM-based (lower-bound)	Virulent	277.693	243.632	198.236	203.466	111.263	267.166	224.034	326.08	239.14	152.922	288.973	208.972	158.155	102.31	27.8548	162.088	105.927	123.987	223.828	155.555	69.2376	122.381	177.585	186.544	232.293	202.37	214.326	236.683	198.84	206.935	195.57	172.187	264.403	197.767	187.287	220.504
RF8|1872820	13857	26	6	1	Low-quality	Genome-fragment	16.59	HMM-based (lower-bound)	Virulent	26.5273	5.04839	23.2223	10.9297	23.1055	33.7203	9.70667	7.84109	90.7234	14.7106	2.63966	22.4866	36.6415	16.1212	0.548048	63.2282	19.0586	12.9015	15.2734	3.93033	14.7658	23.5535	4.6722	6.964	85.8773	60.3091	38.2295	30.1847	107.266	18.3439	22.6415	27.478	60.3913	33.7773	209.05	44.9769
RF4|84743	6722	9	2	0	Low-quality	Genome-fragment	11.47	HMM-based (lower-bound)	Virulent	0	0	0	0	0	0	0	0	0	0	0	0	0	0	0	0	0	0	52.4753	0	0	0	0	0	0	0	4.77623	0	0	0	495.15	0	0	0	0	0
RE12|67205	16304	22	1	1	Low-quality	Genome-fragment	32.11	AAI-based (medium-confidence)	Virulent	4.16233	6.00697	6.1678	2.89002	23.7918	1.22826	0.970569	0	3.55332	6.68751	1.68261	10.1929	2.44688	6.25877	104.757	0.624867	2.97518	1.60466	2.4039	2.08777	54.6369	3.38774	0.661829	2.13077	1.14942	0	1.9692	0	0.552524	0.362575	2.50999	0.873044	2.80697	2.10057	0	0.682616
RE10|1034596	5916	18	2	0	Low-quality	Genome-fragment	5.01	HMM-based (lower-bound)	Virulent	20.0743	14.1898	2.26639	5.68903	7.28535	2.25665	6.68702	0	8.8134	4.80788	0	0	154.485	3.72944	0	4.59222	9.11038	13.2669	0	57.5373	8.01378	23.7652	0	45.6728	6.33543	0	0	1.55388	2.28407	0	1.15289	0	4.42044	0	0	0
RE5|1802163	20214	33	4	0	Low-quality	Genome-fragment	20.95	HMM-based (lower-bound)	Virulent	69.662	15.9194	40.793	86.247	28.48	38.6363	22.7021	75.5086	60.1861	61.2095	4.9762	65.7702	97.4231	16.2359	23.5185	84.8398	89.855	74.2048	26.3693	99.0154	34.1932	99.1132	9.07479	55.1866	125.389	77.4137	71.8704	64.1227	119.434	45.0361	44.2013	36.7929	98.9698	48.004	5.89635	73.2268
RF5|2170603	17499	26	5	0	Low-quality	Genome-fragment	39.31	AAI-based (medium-confidence)	Temperate	0	0	2.29864	27.1189	0.527787	0	0	120.635	3.31067	0	0.52257	29.915	0.414506	0	0.0867969	124.008	0.308001	1.74426	0	42.5999	0.0712966	1.14778	0.308316	8.82337	1.60639	0	0	43.6023	0.514793	0	0.389765	172.649	1.49445	1.30475	1.48069	47.276
RE1|553421	6072	9	1	0	Low-quality	Genome-fragment	3.87	HMM-based (lower-bound)	Virulent	12.1077	3.4563	2.20816	52.103	15.7174	0	0	86.0629	3.81643	0	0	69.1068	20.905	0.908406	0	158.835	33.73	0.718115	3.87285	17.3783	2.67112	1.6539	0	19.7069	43.9802	0	0	127.929	22.9957	2.92066	0	87.9083	8.61374	0.940046	0.853446	102.642
RE12|1121718	8540	18	3	1	Low-quality	Genome-fragment	11.84	AAI-based (high-confidence)	Virulent	0	0	1.57002	0	0.720979	0	0	0	0	0	0	0	0.84935	6.45883	53.0889	0	0.631113	1.02117	0	0.398584	0.438274	0	0	0	0.5486	0	0	0	0	0	0	0	0	0	0	0
RE12|909043	5367	11	2	0	Low-quality	Genome-fragment	9.68	HMM-based (lower-bound)	Virulent	0	0	2.49822	0	2.86806	0	0	0	0	0	0	0	0	0	44.5724	0	21.0888	0	5.84211	0	0	8.42019	0	7.19211	0	0	0	0	0	0	0	0	0	0	0	0
RE2|328905	12267	19	5	0	Low-quality	Genome-fragment	32.25	AAI-based (high-confidence)	Virulent	23.5115	19.9596	28.9648	43.624	16.5637	26.1195	16.1247	48.0832	11.3345	13.9122	7.45451	64.3497	28.0866	3.59719	1.91916	115.44	57.7766	11.7301	5.11202	37.7379	4.98356	24.9691	12.3149	30.2079	46.9765	16.9172	68.0485	94.4229	32.3117	7.71034	13.9001	80.3548	46.3676	33.9676	4.22444	127.017
RE1|577340	12179	29	4	0	Low-quality	Genome-fragment	23.06	HMM-based (lower-bound)	Temperate	2.32171	2.87197	1.65136	45.8736	3.79167	9.86559	3.24825	71.7962	7.13524	2.72469	0.750837	44.688	8.33798	0.679347	0.685912	100.66	0.885081	0.358026	4.50534	22.6387	4.71225	2.47372	5.75893	7.92349	20.3882	4.60526	38.2244	164.924	47.7083	15.0467	18.4807	416.657	9.66261	7.03008	13.1904	245.207
RE1|349742	23144	32	8	1	Low-quality	Genome-fragment	37.91	HMM-based (lower-bound)	Virulent	118.021	37.4805	33.3114	278.191	14.632	28.8419	12.6489	26.3797	62.8296	5.73522	0.395111	143.609	65.5017	4.52821	22.6739	54.7307	10.0137	8.47813	6.77381	12.5014	12.5064	12.5835	40.5621	6.00416	107.895	33.4431	45.4315	25.222	37.5608	24.2648	30.3539	32.4425	44.3501	37.4875	22.6147	50.011
RE2|2455200	9091	13	1	0	Low-quality	Genome-fragment	25.74	AAI-based (medium-confidence)	Virulent	0	0	0	0	0	0	0	0	0	0	0	0	0	0	0	0	142.583	0	0	0	0	0	0	0	0	0	0	0	0	0	0	0	0	0	0	0
RE11|1435234	16532	22	12	0	Low-quality	Genome-fragment	41.19	AAI-based (medium-confidence)	Virulent	0.342077	0	6.48825	0	1.11732	0	0	0	0	32.9764	0	0.502615	18.8663	162.486	11.1627	0	0.652033	0	0	0	1.88667	0.911186	0	0	0	0	0	0	0.272452	0.357575	4.12563	0	0	1.38107	3.1346	0
RD7|30134	18959	32	3	0	Low-quality	Genome-fragment	28.36	HMM-based (lower-bound)	Virulent	50.1121	24.7219	43.4933	42.4277	7.14476	34.5043	79.7092	22.3782	15.8897	420.073	19.7754	12.7099	17.0251	4.80043	7.85106	26.6889	18.3362	38.1785	25.2206	9.51564	10.9896	21.1878	19.9201	17.1022	36.0787	36.0919	66.0439	21.3345	2.13817	32.739	76.6267	27.2159	22.4146	34.0207	13.12	31.1122
RD2|1812038	5093	8	0	0	Low-quality	Genome-fragment	11.26	AAI-based (medium-confidence)	Virulent	54.4091	35.7126	21.061	9.25169	99.738	41.941	38.838	2.03181	39.8129	22.3392	12.5685	4.8945	50.5591	8.12268	6.85917	4.00072	11.1117	53.9377	20.0083	46.7845	7.10405	133.098	4.23737	36.3794	1.8398	5.50633	4.72793	0	7.07509	37.1423	8.03514	4.89097	30.8085	2.24149	9.1575	1.45682
RE9|1655571	7525	5	2	0	Low-quality	Genome-fragment	7.15	HMM-based (lower-bound)	Virulent	0	0	0	3.57808	0	0.887065	0	0	0	2.51991	0	4.41687	15.9046	1.466	0	4.51288	0	15.0658	3.12504	75.5419	1.49217	4.00365	0.716974	81.0473	0	0	0	0	0	0.785571	0	0.945788	0	0	0	0
RE12|182408	16238	14	1	5	Low-quality	Genome-fragment	28.43	HMM-based (lower-bound)	Virulent	0	6.03139	0.825716	0.829075	7.77324	0	0	0	0.356777	0	0	2.04686	0.446696	5.77468	60.5186	0	1.32768	0	0	0	35.1128	0.618455	0	0	0	0	0	0	0	0	0	0	0	0	0	0
RF9|1070458	5331	4	1	0	Low-quality	Genome-fragment	4.85	AAI-based (high-confidence)	Virulent	7.42572	56.4263	44.0142	27.1473	40.4241	46.3292	53.4299	13.5877	49.9894	18.6742	8.57667	18.704	14.2865	13.4507	4.27366	37.5841	59.1442	58.0732	7.35195	5.74661	4.91465	81.0029	2.0241	44.1681	29.0014	71.5428	63.236	46.5586	76.0413	13.3065	21.7498	17.3554	93.2048	73.879	12.637	96.0328
RF8|797264	5177	4	1	0	Low-quality	Genome-fragment	2.89	HMM-based (lower-bound)	Virulent	208.643	116.21	60.8629	131.973	29.7333	117.334	94.7555	157.909	106.31	178.561	261.421	140.44	98.7769	77.778	7.04126	165.304	70.2733	96.018	351.278	152.541	26.0272	86.3223	269.918	131.972	281.447	240.514	206.204	201.541	162.697	391.659	202.889	244.705	241.206	218.307	322.319	208.528
RE5|503516	9056	11	7	0	Low-quality	Genome-fragment	20.47	AAI-based (medium-confidence)	Virulent	0	0	0	0	0	0	0	0	0	0	0	0	0.400477	0	0	0	0	0	0	170.646	0	0	0	0	1.03468	0	0	1.0151	0	0	0	0	1.44387	0	0	0
RE9|2098386	8269	5	1	4	Low-quality	Genome-fragment	3.73	HMM-based (lower-bound)	Virulent	9.57467	109.98	4.86442	8.14036	46.9103	16.9523	23.9209	2.50284	18.9165	3.43977	16.5881	8.54136	108.771	3.33525	13.0414	4.10684	1.30359	75.4065	115.651	106.617	12.2212	51.6151	1.30493	232.469	3.96606	13.5657	3.88267	0	0	1.42978	0	0	0	0	0	0.897277
RF1|1301092	12127	15	4	0	Low-quality	Genome-fragment	12.89	HMM-based (lower-bound)	Virulent	6.52865	17.8826	6.08096	123.779	10.9161	23.1184	11.7438	106.236	3.82178	9.38185	10.5568	87.0185	10.4672	7.05002	1.87869	172.78	7.33323	5.39341	15.5131	38.1736	6.68716	9.1092	19.1304	11.777	56.4045	37.0001	61.5536	239.919	133.71	60.9325	70.3028	394.675	24.7992	27.2995	44.4414	275.32
RE12|303996	34420	57	16	0	Medium-quality	Genome-fragment	85.3	AAI-based (medium-confidence)	Virulent	0.3286	2.03241	4.86925	0	6.08203	0.387866	0.229869	0	0.50494	0.688636	0.265672	0.120704	0.6322	2.32364	342.03	0	4.07125	0.253364	0	0.197787	5.2558	0.583526	0	0.78501	0.680571	0.3259	0	0	0.654297	0	12.6819	0	0	0.66333	0	0.10778
RE6|290517	12074	16	5	0	Low-quality	Genome-fragment	18.72	HMM-based (lower-bound)	Virulent	0	2.31756	6.6629	0	33.1469	0	0	0	0.959639	1.57051	0	13.0757	0	0	9.0573	0	1.56236	0	0	0	74.915	2.49523	0	0	0	0	0	0	0	0	0	0	0	0	0	0
RE9|1593689	10086	20	1	1	Low-quality	Genome-fragment	6.42	HMM-based (lower-bound)	Virulent	8.97119	6.9359	0	0	18.6192	13.8983	18.0426	1.02598	20.1038	2.82009	16.3197	7.00263	146.349	7.38289	2.86123	2.69359	2.1375	62.6866	72.2779	13.837	8.28777	11.9482	7.48891	229.243	0.92902	3.33655	7.16221	0	2.67946	0	4.0574	0	5.18567	0	4.11035	1.47126
RE12|1754712	11409	15	2	0	Low-quality	Genome-fragment	16.07	AAI-based (medium-confidence)	Virulent	0	0	7.05126	0	64.2214	0	1.38699	0	1.01557	32.4099	1.60302	1.45661	4.45036	103.945	49.324	0	10.8654	0	0	0.596706	29.963	0.880224	0	0	0	0	0	0	0	0	5.97817	0	0	2.00121	0	1.30065
RE12|918236	6708	16	1	0	Low-quality	Genome-fragment	6.03	HMM-based (lower-bound)	Virulent	0	0	0	0	2.75365	0	0	0	0	0	0	0	0	0	41.2094	0	0	0	0	0	0	0	0	0	0	0	0	0	0	0	0	0	0	0	0	0
RF2|1388814	11530	27	2	0	Low-quality	Genome-fragment	10.28	HMM-based (lower-bound)	Virulent	73.5717	74.6273	38.3749	7.58946	17.8894	120.998	37.0557	8.97485	99.4867	97.0317	103.896	10.0893	24.2201	39.4672	0.856252	2.65078	14.491	53.3231	25.1544	0	10.1714	47.0333	90.7783	6.02603	66.639	118.693	52.9064	5.97967	86.3334	121.51	49.6896	1.85179	92.4255	80.6936	67.8665	6.75677
RE6|2095352	6924	4	4	0	Low-quality	Genome-fragment	15.34	AAI-based (medium-confidence)	Virulent	0	24.248	0	0	0	0	0	0	0	0	0	0	0	0	0	1.47138	2.72443	0	4.52839	3.44127	60.3628	21.7558	6.23365	5.57482	0	0	0	0	0	0	0	0	0	0	0	0
RE12|1101117	9211	11	4	0	Low-quality	Genome-fragment	13.52	AAI-based (medium-confidence)	Virulent	0	0	0	0	1.33691	0	0	0	0	34.4825	0	0	0	2.69474	34.1335	0	0.585138	0	0	0	0.812693	0	0	0	0	0	0	0	0	0.641779	8.88567	0	0	0	0	0
RD1|728725	6550	4	4	0	Low-quality	Genome-fragment	13.09	AAI-based (medium-confidence)	Virulent	1.72678	0	0	144.388	0.470012	0	1.20795	0.789924	0	0	0	0	6.64438	0	0.579717	0	0	0	0	0	0	1.5332	0	0	0.715274	0	12.2541	0.701736	1.37532	4.51254	3.12389	3.80301	0.998142	0.871444	3.16466	0.56638
RD2|85820	6372	21	1	0	Low-quality	Genome-fragment	1.73	HMM-based (lower-bound)	Virulent	5.32506	7.68501	2.1042	7.39467	270.56	1.04758	2.48339	4.05995	0	0	0	10.4322	0	1.29846	3.69465	3.19769	6.76673	0	0	0	0.783188	31.5207	3.38683	0.605776	8.82306	7.04174	0	10.8201	7.06871	0	4.28154	7.81849	1.02602	13.4368	1.62653	3.49321
RD12|2248533	5627	7	1	0	Low-quality	Genome-fragment	13.85	AAI-based (medium-confidence)	Virulent	22.1103	4.97285	202.537	6.57934	41.5803	46.2647	177.168	7.35596	28.8277	42.1234	21.1263	391.318	4.51165	9.31233	8.77251	0	8.14154	1.54981	6.96521	7.25909	2.43892	112.436	13.4233	10.9757	11.6564	3.98702	14.2642	1.63368	0.800458	60.9317	95.756	18.3397	75.5214	2.02877	121.564	7.25212
RE12|247933	29478	50	3	0	Medium-quality	Genome-fragment	74.83	AAI-based (medium-confidence)	Virulent	0	2.84777	3.8662	0	1.1488	0	0	0	0	1.12572	0	0.281879	2.3376	3.27455	168.668	0	0.548514	0	0.53183	0.346418	18.8341	2.2144	0	0.261891	0	0	0.544573	0	0	0	1.61963	0	0	0	0	0
RE12|339555	8137	9	4	0	Low-quality	Genome-fragment	20.71	AAI-based (medium-confidence)	Virulent	0	0	0	0	5.67515	0	0	0	0	0	0	0	0	0	43.5853	0	2.64948	0	0	0	0.306653	0	0	0	0	0	0	0	0	0	0	0	0	0	0	0
RE12|419470	8874	12	4	1	Low-quality	Genome-fragment	18.99	AAI-based (medium-confidence)	Virulent	0.637279	3.15328	2.26639	0.379269	4.16306	1.50443	1.7832	0.583052	1.30569	0	0	0	2.04345	1.24315	44.2444	0.382685	0.911038	0.491368	0	0	4.49896	0	0	1.73992	1.58386	0	0	0	1.52271	0	0	0	0	0	0	0
RE9|2263711	5037	5	0	3	Low-quality	Genome-fragment	1.56	AAI-based (medium-confidence)	Virulent	1075.58	1054.12	694.755	481.091	347.158	691.768	856.082	860.793	862.618	860.211	1524.98	612.016	542.172	520.703	69.6558	528.572	423.729	734.956	1385.03	505.484	185.273	749.647	1115.04	482.788	680.853	899.715	595.969	528.35	583.925	975.262	486.114	444.375	806.034	681.057	765.436	502.298
RD2|1166378	14788	27	6	1	Low-quality	Genome-fragment	28.29	AAI-based (high-confidence)	Virulent	0	1.41917	0	0	172.166	0	0	0.699757	0	1.60284	0	0	0	1.30548	27.7314	0	21.5034	0	0	0	6.41189	0.339548	0	1.82716	0	0	0	0	0	0	2.76731	0	0.884207	0	0	1.00346
RE6|1388791	6473	8	7	0	Low-quality	Genome-fragment	10.7	HMM-based (lower-bound)	Virulent	6.98929	3.24218	18.6423	0	21.8778	14.4373	0	0	8.05501	10.9854	2.82541	12.1949	33.0568	5.11278	13.3748	1.5739	2.49793	16.1671	8.47683	3.68104	45.8726	24.0473	0.833497	4.77059	3.61892	0	0	0	4.17505	10.9589	18.9663	0	1.01002	0	4.80345	5.73118
RF9|370298	5247	12	3	0	Low-quality	Genome-fragment	10.22	AAI-based (medium-confidence)	Virulent	14.0114	11.9992	17.8875	152.021	2.34693	47.0709	107.063	42.4018	24.2907	21.6836	0	50.6757	8.98559	1.57686	0.144736	113.91	10.7856	10.8033	1.49393	1.9462	2.85333	0	22.6215	0	128.578	60.9298	4.58917	69.204	108.162	86.7504	11.699	74.6023	41.1184	78.3253	25.6785	132.922
RE1|1949888	5497	6	1	0	Low-quality	Genome-fragment	5.38	AAI-based (high-confidence)	Virulent	0	0	0	11.0208	0	0	0	7.52993	0	0	0	36.2783	0	25.0857	0	142.09	0	0	0	18.5769	0	0	0	0	6.81833	0	2.9203	108.701	0	0	4.96306	89.3355	0	2.07675	0	101.231
RE1|1497344	17595	21	6	0	Low-quality	Genome-fragment	39.52	AAI-based (medium-confidence)	Virulent	0.964231	0	0.381017	15.3027	0.349938	0	0.449678	73.2212	0.329261	0	0.519718	16.7649	0.824489	0.313489	0	96.8891	0.15316	0	0	38.3048	0.0709076	0.570758	0	5.92328	0.266272	0.318769	0	28.213	1.02397	0	0	110.022	1.48629	0	0.589045	29.0964
RE6|346950	19037	23	10	0	Low-quality	Genome-fragment	35.81	AAI-based (medium-confidence)	Virulent	0	0	0	0	0	0	0	0	0	0	0	0	0	0	0	0	2.83117	0	0	0	87.0325	1.58257	0	0	0	0	0	0	0	0	0	0	0.686855	0	0	0
RE10|2240003	33196	48	1	0	Medium-quality	Genome-fragment	88.78	AAI-based (medium-confidence)	Virulent	0	0	0	0.101387	0.278219	0	0	0	0.349038	0.142806	0	0.250308	193.594	0.16616	0	0	0	0	0.708397	0	0.0375834	0.907562	0.325053	1.97675	0	0	0	0	0	0.712306	0	0	0	0	0.156107	0.223508
RE6|2075205	7581	17	3	0	Low-quality	Genome-fragment	18.55	AAI-based (medium-confidence)	Virulent	4.47583	0	12.3804	0	10.1523	5.28308	1.04367	0	6.87773	0.625323	0	2.74015	4.78396	1.09138	0.500877	0	0.710949	2.3007	4.13595	3.14304	71.2596	4.63642	0	4.07335	1.236	0	4.23504	0	0	3.11907	12.5956	0	3.44959	0	2.73427	0
RD2|352777	7926	11	4	0	Low-quality	Genome-fragment	13.36	AAI-based (medium-confidence)	Virulent	32.8211	14.1217	2.53747	25.9025	98.2691	24.4234	24.9561	10.4446	36.5464	18.5412	3.46118	122.133	109.36	5.21938	0.479075	4.28456	4.76002	41.2604	28.6804	96.1993	38.8799	40.545	3.4035	71.1028	36.057	1.41528	0	2.31964	2.8414	23.1206	3.44209	3.59175	29.6949	1.44031	36.6136	22.4666
RE6|151908	5139	9	0	0	Low-quality	Genome-fragment	10.49	AAI-based (high-confidence)	Virulent	2.2009	1.36127	1.30453	0	0.599062	0	0	0	0	9.2247	0	0	22.5832	25.2232	5.91111	0	2.09757	3.39396	4.57598	0.662368	55.1098	9.77085	1.04986	6.00896	1.82333	1.09141	3.12374	0	0	0	5.30881	0	1.2722	0	0	0
RE9|2343641	18390	18	6	2	Low-quality	Genome-fragment	33.36	AAI-based (medium-confidence)	Virulent	159.601	79.1231	12.3945	29.2823	136.937	68.9658	63.6753	12.942	123.805	27.5824	77.5712	21.0103	354.981	12.2974	6.68992	13.111	3.51693	223.118	128.726	144.56	61.3972	95.5647	4.69405	239.912	9.6809	11.2846	0	0	0.489851	4.50027	0.37088	1.16102	0.71102	0	0	0.806915
RE2|1973086	5039	12	0	0	Low-quality	Genome-fragment	9.19	AAI-based (medium-confidence)	Temperate	0	0	0	0	0	0	0	0	0	0	0	0	0	0	0	0	120.865	0	0	0	0	0	0	0	0	0	0	0	1.78773	0	0	0	0	0	0	0
RE10|24098	5819	11	5	0	Low-quality	Genome-fragment	3.24	AAI-based (medium-confidence)	Virulent	5.83112	0	0	9.25419	17.9879	2.29427	0	1.77831	16.925	2.44401	6.28592	17.1354	134.623	5.21346	1.43559	1.16719	0.926225	32.2215	9.42955	72.5356	20.154	18.9839	8.34457	94.195	15.2975	0	0	0	0	0	0	1.22307	2.24706	0	3.56221	1.27506
RE6|2251618	10245	13	0	1	Low-quality	Genome-fragment	20.53	AAI-based (medium-confidence)	Virulent	0	1.36565	0	0	25.2417	0	0	0	3.39288	8.79169	0	0	9.20398	16.6902	3.26158	0	12.3629	0	0	0	88.4111	1.96046	0	0	0	0	0	0.89729	0	0	0	0	0	0	0	0
RE12|955195	5275	11	6	0	Low-quality	Genome-fragment	6.62	AAI-based (medium-confidence)	Virulent	0	0	0	0	0	0	0	0	0	0	0	0	2.06259	0	44.0541	0	21.4566	0	0	0	0	0	0	0	0	0	0	0	0	0	20.6877	0	0	0	0	0
RE12|237826	9155	19	2	0	Low-quality	Genome-fragment	7.36	HMM-based (lower-bound)	Virulent	0	0	0	0	0.672546	0	0	0	0	0	0	0	0	0	38.0752	0	0.294358	0	0	0	0.817664	0	1.17864	0	0	0	0	0	0	0	0	0	0	0	0	0
RE10|1840715	20996	19	3	0	Low-quality	Genome-fragment	14.28	HMM-based (lower-bound)	Virulent	18.8543	3.99822	0	3.04568	12.0234	8.26607	1.50735	0	3.31111	0.677354	5.66193	4.74904	160.47	2.10167	1.88085	2.26439	7.44434	50.4656	22.7737	5.02577	23.4716	15.784	1.02786	226.864	4.23966	8.81542	0	0.656749	1.07263	0.28155	0	0.169486	1.24554	0	0.246815	0.706761
RD7|1173441	8357	7	0	0	Low-quality	Genome-fragment	14.87	AAI-based (medium-confidence)	Virulent	1686.35	1247.26	1034.04	778.481	424.009	1950.55	1278.13	775.141	911.6	1738.64	1872.22	712.405	598.451	879.155	94.5084	548.991	561.414	931.352	2605.69	541.318	210.798	690.368	1962.61	538.101	1445.26	1767.79	1481.01	1010.35	1234.78	2276.29	1773.47	559.946	1394.87	1568.89	2286.29	675.193
RE9|1868206	7256	7	1	0	Low-quality	Genome-fragment	11.87	AAI-based (medium-confidence)	Virulent	28.0578	22.1744	8.31531	39.4265	75.0977	11.0394	28.3509	11.409	55.8894	12.4133	15.1231	123.677	149.947	4.56106	0.523311	12.6365	2.97117	42.6665	29.1681	115.872	33.0131	38.0607	5.94843	112.779	41.9691	1.54596	0	0	0.620753	21.1821	9.39979	4.41383	36.0409	2.35996	34.2809	17.8945
RF4|1523358	6203	8	2	0	Low-quality	Genome-fragment	11.5	AAI-based (medium-confidence)	Virulent	1.82338	13.5332	62.6844	0	54.0973	0	7.65315	0	2.80187	3.05695	0	2.6791	29.8183	0.444611	6.2439	0	81.6753	1.4059	29.0648	20.8526	5.63168	3.23794	2.60933	1.24456	3.77644	2.7126	34.937	8.15091	37.7587	7.62395	301.276	0	13.7017	18.4039	3.34169	19.7361
RE6|2159903	6430	16	3	0	Low-quality	Genome-fragment	2.45	HMM-based (lower-bound)	Virulent	0	0	4.17044	0	0	0	0	0	0	0	0	0	0	11.1518	0.118107	3.16884	2.09553	0	3.65722	0.529379	74.8959	51.5399	11.747	1.20062	0	0	0	0	0	0	0	0	0	0	0	0
RD3|2185870	6769	12	4	1	Low-quality	Genome-fragment	3.47	HMM-based (lower-bound)	Virulent	0	0	0	0	0	295.841	0	0	0	0	4.05279	2.45509	0	0.814868	0	0	0	2.57669	0	0	0	2.2254	0	0	1.38427	0	0	0	0	0	0	0	0	0	0	3.28834
RE6|955773	12224	17	3	0	Low-quality	Genome-fragment	14.11	AAI-based (medium-confidence)	Virulent	0	0	0	0	0	0	0	0	0	0	0	0	0	0	0.124252	0	0	0	0.641251	0	81.1401	0	0	0	0	0	0	0	0	0	0	0	0	0	0	0
RE12|1519787	9324	19	6	0	Low-quality	Genome-fragment	12.88	AAI-based (high-confidence)	Virulent	0	0	0	0	0	0	0	0	0	1.01685	0	0	0	7.69047	59.5391	0	1.15609	0.935306	0	0	1.47188	0.538528	0	0	0	0.601539	0	0	0	0	0	0	0	0	0	0
RD12|953362	6043	6	1	0	Low-quality	Genome-fragment	4.18	HMM-based (lower-bound)	Virulent	32.754	113.448	348.345	5.56947	47.8879	24.3014	51.0626	5.13718	20.1324	1.56895	6.05292	57.0633	20.4052	0.912765	4.7755	4.49571	0	5.77249	2.59429	0	0	42.3768	22.3202	6.38756	20.1574	16.7065	34.5338	9.88794	8.94426	10.7605	106.094	8.83302	10.8188	32.1149	23.1536	5.52509
RE12|2005342	8032	14	4	0	Low-quality	Genome-fragment	7.16	HMM-based (lower-bound)	Virulent	0	0.87096	3.33864	0	4.21618	0	0	0	0	8.26295	0	1.03452	0	0	35.9292	0	1.34206	0	0	0	6.21324	0	0	0	0	0	0	0	0	0	0	0	0	0	0	0
RF2|2287637	24239	36	7	0	Low-quality	Genome-fragment	47.28	AAI-based (medium-confidence)	Virulent	33.3634	6.63797	69.9744	9.85849	48.2636	14.0449	16.6474	7.89794	110.183	23.078	4.14988	3.59945	6.13456	120.721	21.8376	0.980717	1100	173.416	7.43797	17.9752	63.4129	31.0733	39.1749	29.6201	13.53	2.08254	10.9276	0	161.852	14.8767	305.865	2.9362	7.82198	2.82584	30.5724	2.29576
RD2|1033278	9584	12	0	1	Low-quality	Genome-fragment	27.01	AAI-based (high-confidence)	Virulent	0	2.18976	1.399	1.40469	159.004	0	0	0	1.20896	850.77	7.63309	3.90146	23.0833	18.1291	0.316957	0.708669	10.4037	1.3649	0	0	22.2603	1.04784	0	0	0.977681	0	0	0.479588	3.28978	0	4.26992	0	0	0.595572	0	3.87082
RE1|1011548	82903	150	7	1	High-quality	High-quality	95.97	AAI-based (high-confidence)	Temperate	7.64006	9.1133	10.7551	87.1217	2.5623	15.5399	8.68484	9.36155	7.26762	7.43368	7.5006	565.138	1.8811	127.479	3.13288	642.052	3.67319	13.6225	29.3111	8.70449	1.98649	6.96528	101.132	2.32802	2.65608	12.8543	13.0704	5.3225	7.00866	16.9707	21.0613	8.24141	9.77879	22.7208	25.6284	9.57619
RE3|1767731	23892	9	1	0	Low-quality	Genome-fragment	10.89	HMM-based (lower-bound)	Virulent	0	0	0	0	0	0.558778	0	0	0	0	0	0	0.303593	0	0	0	0	274.487	0	0	0	0	0	0	0	0	0	0	0	0	0.570944	0	0	0.955627	0	0
RE12|168612	14678	29	1	0	Low-quality	Genome-fragment	34.92	HMM-based (lower-bound)	Virulent	0	0	12.7886	0	0.629223	0	0	0	0	0	0	0	0.988343	0	82.6794	0	0.183598	0	1.06808	0	0.0849992	0.684186	0	0.525958	0	0	0	0	0	0	0	0	0	0	0.706108	0
RF8|1522717	42265	87	19	0	Medium-quality	Genome-fragment	70.51	HMM-based (lower-bound)	Virulent	0	0	0	0	0.21852	0	0	0	0	0	1.94724	0	0	0.130506	0	0.401744	0.255043	0	1.85464	0.0805373	0	0.237607	6.25497	0	34.2525	13.9339	15.5724	5.87257	6.71391	13.567	226.892	0.252587	6.03278	18.7722	350.543	1.93104
RE6|1776581	5157	12	5	0	Low-quality	Genome-fragment	11.55	AAI-based (high-confidence)	Virulent	0	0	0	0	2.38788	0	0	0	0	0	0	0	0	0	0.589047	0	19.3348	0	6.08001	0	50.3209	14.6051	0	4.49099	0	0	0	0	0	0	0	0	0	0	0	0
RE6|1222690	6524	5	0	1	Low-quality	Genome-fragment	14.03	AAI-based (medium-confidence)	Virulent	0	0	1.02759	0	32.5601	0	0	0	0	0	0	0	0	5.91829	4.65622	0	14.8704	1.33672	0	0	77.6415	0	0	0	0	0	0	0	0	0	0	0	0	0	0	0
RE6|1119345	11157	15	6	0	Low-quality	Genome-fragment	15.48	HMM-based (lower-bound)	Virulent	111.513	65.8361	21.0307	75.7169	27.3173	54.4447	20.5656	205.903	103.332	55.6615	42.62	105.011	44.8586	32.8765	1.56555	181.105	36.4724	35.5648	54.801	91.8326	85.9925	70.6583	143.621	70.9242	89.023	45.7467	77.6963	85.2782	54.5007	78.9461	23.2301	96.6419	100.789	40.9283	24.6171	117.375
RE5|1181306	13007	17	5	0	Low-quality	Genome-fragment	33.06	AAI-based (medium-confidence)	Virulent	2.17391	1.07566	0	9.83271	1.42012	0	0	2.38672	0.890803	1.45785	2.10912	0	10.8743	0.848134	0	1.04434	0	1.67617	0	213.284	4.70003	1.54417	1.65918	28.4893	3.24175	0	0	0.706753	0	0.90896	2.09748	0	0.502639	0	0	0
RE10|769621	5346	6	0	1	Low-quality	Genome-fragment	9.78	AAI-based (medium-confidence)	Virulent	338.509	319.288	279.646	167.463	116.325	405.804	321.16	170.338	219.987	262.478	468.683	158.538	151.961	145.48	38.0709	74.9572	154.251	190.043	442.812	88.5041	72.1126	190.668	352.214	135.021	328.637	393.43	328.805	175.395	296.572	379.278	454.189	83.871	305.735	370.494	362.536	176.26
RE12|793923	35367	56	8	0	Medium-quality	Genome-fragment	58.12	HMM-based (lower-bound)	Temperate	0	0	0	0	0.435234	0	0	0	0	0	0	0	0	0	90.8945	0	0	0	0	0	0	0	0	0	0.132469	0	0	0	0	0	0	0.100617	0	0	0	0
RD2|122615	9476	24	2	0	Low-quality	Genome-fragment	5.88	HMM-based (lower-bound)	Virulent	7.16152	0	0.70747	2.84139	141.973	0	3.33984	0	14.6729	0	0	7.89184	12.63	0	1.20214	0.716746	67.6841	14.7248	3.30884	6.46584	1.97491	1.05978	0	27.2921	2.96647	3.55134	0	0	24.2416	1.87149	0	0	1.37987	1.20472	0	0
RE6|2241002	5960	9	4	0	Low-quality	Genome-fragment	6.96	AAI-based (high-confidence)	Virulent	0	0	2.24966	0	26.3436	0	0	0	0	202.031	4.60291	6.97084	20.0808	19.8977	3.05811	0	2.26078	0	0	0	39.7731	0	0	0	0.786082	0	0	0	1.51147	0	1.14438	0	0	0	0	4.97958
RD3|818523	5160	7	0	7	Low-quality	Genome-fragment	3.37	AAI-based (medium-confidence)	Virulent	268.513	267.078	215.671	137.626	63.2422	313.06	254.536	109.296	189.743	190.174	269.371	136.877	89.2624	90.8617	25.1671	94.1124	115.941	143.656	215.715	57.3915	36.268	144.02	175.659	110.713	204.29	255.437	335.991	148.758	222.59	274.95	203.557	114.48	296.483	297.566	213.913	166.797
RE1|1246151	9045	12	2	0	Low-quality	Genome-fragment	8.41	HMM-based (lower-bound)	Virulent	56.896	17.7886	26.6825	50.2333	18.0392	20.6639	14.8707	38.3259	37.7896	25.6814	3.03298	47.7701	67.763	8.84242	16.7083	85.2271	54.5227	65.0805	15.5993	59.4602	22.2075	49.9626	6.56136	37.9813	96.3426	39.0659	29.2839	40.1452	71.7083	25.4887	24.13	19.2778	72.2811	29.6599	10.3127	57.8309
RD7|588577	11998	28	6	0	Low-quality	Genome-fragment	13.83	HMM-based (lower-bound)	Virulent	0	0	0.558759	0	7.69773	1.11271	0	0	0.482859	283.296	4.57299	0	6.95238	9.8842	2.21537	0	11.2304	0	0	0	7.38297	0.418506	0	0.643441	1.56194	0	0	0	0	0	8.52704	0	0	1.90297	0	0
RF11|1980151	5902	6	0	2	Low-quality	Genome-fragment	0.57	AAI-based (medium-confidence)	Virulent	196.428	178.978	112.452	121.464	67.8101	230.724	199.746	124.485	112.883	180.723	181.278	97.1429	108.765	114.485	16.7275	70.7728	66.207	131.506	280.236	66.3249	36.5703	83.3754	246.817	75.2119	180.194	240.429	193.114	123.048	164.843	244.39	218.413	76.5729	165.052	219.537	247.604	81.7134
RD2|333668	8639	14	1	0	Low-quality	Genome-fragment	12.13	HMM-based (lower-bound)	Virulent	16.3654	34.8199	6.20811	18.3105	121.875	37.0885	27.4757	0	29.5065	26.8883	16.9361	19.7175	60.0326	3.51165	0.263721	3.14476	1.24776	63.5965	15.4251	28.7632	10.9757	8.71844	3.74712	123.32	5.96545	4.54465	1.85819	0	1.04275	0.684272	3.9475	0	0	0	1.79956	0
RD2|1490154	7323	5	2	0	Low-quality	Genome-fragment	2.34	HMM-based (lower-bound)	Virulent	1.54451	3.82114	40.2807	5.05557	123.597	4.55767	65.907	4.23925	4.74669	50.4936	9.98984	13.6161	6.43826	5.27255	0.414819	0	4.04798	1.19088	2.14083	5.57789	1.02222	88.4528	0	8.43371	7.03749	0	0	0	0	44.3982	11.1766	0	26.7834	12.4713	0	0
RD1|1155942	7580	11	6	0	Low-quality	Genome-fragment	19.21	AAI-based (medium-confidence)	Virulent	4.47642	1.84579	0	183.378	10.1536	5.28377	10.4381	0	3.05717	0.625405	0	0	0	5.45763	0	0	0	0	0	0	0.164593	0	0	0.509236	0	0	0	0	0	0	0	0	0	0	0	0.489418
RF2|918961	9261	25	8	1	Low-quality	Genome-fragment	8.35	AAI-based (medium-confidence)	Virulent	76.9417	131.436	79.6284	16.7173	48.2015	107.397	62.3671	33.5212	77.5698	70.1283	130.339	20.1876	28.9793	26.5041	8.2003	9.16732	53.833	38.1376	60.0955	8.08616	7.00531	123.078	92.0469	16.6721	101.178	166.548	286.009	69.9804	145.422	106.598	178.963	10.759	97.4215	152.853	86.1729	72.1048
RE6|1075908	5249	9	4	0	Low-quality	Genome-fragment	9.14	HMM-based (lower-bound)	Virulent	0	1.33274	19.1579	0	11.1437	0	0	0	0	6.32197	0	1.58301	0	2.10167	303.974	0	10.7815	0	0	0	59.8971	7.65287	0	0.735379	0.89256	0	0	0	0	0	32.4847	0	0	0	0	0
RE6|940620	5212	6	4	0	Low-quality	Genome-fragment	13.56	AAI-based (high-confidence)	Virulent	22.7858	24.1596	16.7214	11.6234	63.7925	12.8073	28.843	13.8979	18.8962	5.4573	5.2635	61.3787	66.1049	2.11659	5.82832	2.60625	9.8239	11.7125	33.0872	64.656	56.4923	57.804	6.21093	58.5074	17.9779	0	3.07999	1.76376	1.72839	9.07356	2.61723	6.82757	22.5788	6.57094	19.8854	12.1002
RE6|368370	5197	5	4	0	Low-quality	Genome-fragment	11.65	AAI-based (medium-confidence)	Virulent	0	0	0	0	1.18475	0	6.08973	0	0	0	0	0	4.1871	0	0	5.22754	2.5927	59.5705	0	17.0294	61.2166	1.93236	2.07629	2.97095	0	0	0	0	0	0	0	0	0	0	0	0
RE11|657819	11645	21	2	0	Low-quality	Genome-fragment	5.44	HMM-based (lower-bound)	Virulent	0	0	0	0	0.528739	0	0	0	0	2.44254	0	0	1.24576	176.204	0	0	0	0	0	0	0.214275	0	0	0	0	0	0	0	0	0	0	0	0	0	0	0
RD1|1681464	19813	33	5	0	Low-quality	Genome-fragment	26.86	HMM-based (lower-bound)	Virulent	42.8144	4.59002	0	209.619	5.90451	33.017	0.798676	45.961	3.50881	19.3805	3.23076	65.8431	62.2362	2.64475	0	67.7029	5.30456	0.660232	121.855	92.6011	3.71521	3.04118	3.26769	24.3527	45.8739	0.566168	4.05111	30.6224	5.9107	7.75738	1.37697	94.6522	33.3276	9.50702	6.27724	22.6561
RE5|20172	16452	16	5	0	Low-quality	Genome-fragment	5.51	HMM-based (lower-bound)	Virulent	10.3122	10.6302	0	30.2768	20.5838	17.4466	10.5802	6.60431	16.9025	8.64437	3.33495	6.56577	104.71	4.19086	1.01553	3.50906	4.42262	34.1898	6.19392	376.764	13.8018	8.85096	0.655875	99.7145	2.27817	1.70458	0	0.558761	0.547554	1.07794	0	0	0.794776	0	0	1.57844
RD3|2312727	8852	15	4	0	Low-quality	Genome-fragment	19.46	AAI-based (medium-confidence)	Virulent	0	11.8542	0	0	0	303.142	1.78764	0	0	1.07107	2.06607	0.938685	0	1.86935	0	0.767271	0	0	0	1.53814	0	0	0	0.87212	0	1.26723	1.81348	0	0	0	0	0	0	0	0	1.67636
RE1|235174	19339	30	7	1	Medium-quality	Genome-fragment	50.78	AAI-based (medium-confidence)	Virulent	24.8562	27.13	27.0392	62.652	19.262	43.1458	13.9103	81.6004	21.2693	19.6104	3.7828	103.763	37.6944	2.70958	1.76712	162.782	76.5021	24.1255	17.4291	47.6994	4.58043	43.3604	7.25352	44.1109	55.4773	36.5428	94.214	125.254	43.3206	19.2574	19.0448	93.844	59.1613	37.7795	3.75147	157.876
RE6|1672946	7102	13	1	0	Low-quality	Genome-fragment	15.32	AAI-based (medium-confidence)	Virulent	162.442	179.272	115.163	139.326	94.4988	187.98	94.6954	201.074	146.832	93.4497	66.9545	112.319	157.795	44.2696	7.37829	325.154	179.1	90.2532	60.7048	85.7927	47.9583	109.588	82.8048	72.8303	191.967	142.943	163.874	237.52	190.898	83.236	111.402	151.32	172.145	139.042	51.077	213.122
RE7|144409	5784	9	0	0	Low-quality	Genome-fragment	14.28	AAI-based (medium-confidence)	Virulent	102.662	29.0272	18.5449	9.31019	78.2419	31.16	50.6132	1.78907	30.0484	20.49	17.3909	8.61954	47.654	6.19865	8.27179	8.21978	3.2614	42.9707	42.0121	51.7884	6.25535	172.757	0	24.6923	4.86001	9.697	6.9385	1.58934	3.11492	47.0134	14.1504	8.61331	29.3886	1.97371	10.7513	6.41388
RE12|405549	9624	31	3	0	Low-quality	Genome-fragment	14.46	HMM-based (lower-bound)	Temperate	9.40185	5.81509	3.48295	1.39885	1.59943	0	4.1106	0	1.20394	4.4332	0	0.863387	2.63789	0.859701	54.8424	0.352862	0.280014	0	2.44347	2.12214	0	0.521741	0	0	0.486809	0	2.50201	0.477595	0	0	0	0.369756	0	0.593096	0	0.770946
RE6|496389	12551	16	8	0	Low-quality	Genome-fragment	20.45	HMM-based (lower-bound)	Virulent	3.15405	0	1.06828	0	8.09443	0	0	0	1.84634	18.5075	0	0	37.2757	37.1356	1.87573	0	1.28827	0.694828	0	0	83.6981	0	0	1.23018	2.23969	0	0	0	0	0	2.17369	0	1.0418	0	0	5.91155
RE6|2178970	7679	14	3	0	Low-quality	Genome-fragment	8.39	AAI-based (high-confidence)	Virulent	0	0	0	0.876581	0	0	0	0	0	0	0	0	1.88916	21.5491	0	10.1715	3.50938	1.13567	8.16632	0	85.1351	81.7365	42.1557	0	0	0	0	0	0	0	0	0	0	0	0	0
RE10|194514	8141	10	1	0	Low-quality	Genome-fragment	13.25	AAI-based (medium-confidence)	Virulent	19.4504	10.3116	1.64697	5.78785	46.5134	11.4792	23.3251	5.71994	14.9441	5.24077	41.5606	3.57233	173.741	4.06523	4.75751	6.67425	3.97227	51.4185	59.6974	86.9688	23.6007	17.8867	1.32545	155.045	2.87744	4.1337	0	0	0	0	0	0	0	0	0	1.82277
[truncated: 571 more rows]

## Sheet: TableS4
Table S4. Host prediation of vOTUs using iPHoP.
For all predicted MAG hosts
[truncated: 165 more rows]

## Sheet: TableS5
Table S5. Viral AMGs identified by VIBRANT and DRAMV, and their functions annotation.
[truncated: 443 more rows]

[truncated: 1 more sheets: TableS6]
